# Supplementary material
Source: Royal Society of Chemistry journal article supplement (doi:10.1039/d6cp00581k)
Supplement: d6cp00581k1.pdf [file d6cp00581k1.pdf]

### Supplementary Information

A Systematic Study of Spin-Orbit Coupling and Rate of inter system crossing in pristine and donor-acceptor substituted Phospha-Helicenes as a function of position of phosphole ring.

Avantika,<sup>a</sup> Tejendra Banana,<sup>a</sup> Neelam Chandravanshi,<sup>a</sup> Samarth Razdan,<sup>a</sup> and Md. Mehboob Alam<sup>a,\*</sup>

*Department of Chemistry, Indian Institute of Technology Bhilai, Durg, Chhattisgarh, 491001, India*

E-mail: [mehboob@iitbhilai.ac.in](mailto:mehboob@iitbhilai.ac.in)

#### Contents:

1. Optimized cartesian coordinates of  $S_0$ ,  $S_1$  and  $T_n$  geometries (B3LYP/6-311+G(d,p)) of all the systems considered in this work.
2. Energy difference (eV) between singlet and nearest low-lying triplet.
3. Value of spin-orbit coupling matrix element calculated at CAM-B3LYP/cc-PVTZ level of theory.
4. Value of rate of inter system crossing (in  $\text{sec}^{-1}$ ).
5.  $S_0 \rightarrow S_n$  and  $S_0 \rightarrow T_n$  excitation energy (in eV), wavelength (in nm) and oscillator strength (unitless) calculated at CAM-B3LYP/cc-PVTZ level of theory.
6. s and p character (in %) obtained from Natural Transition Orbitals.
7. Root-mean-square deviation values of all systems in vacuum and other solvents.
8. Python code for calculating rate of inter system crossing ( $k_{ISC}$ ) in ( $\text{sec}^{-1}$ ).
9. Structure of experimentally Studied Phosphahelicene (Yavari et al. *Chem. Eur. J.* **2019**, *25*, 5303-5310)
10. Vibronic spectra of each excited state and convoluted for all states.
11. Merged structure and RMSD value between  $S_0$ - $S_1$  and  $S_0$ - $S_2$  geometries of experimentally studied system considered for benchmarked.
12. Optimized Cartesian coordinates of experimentally studied phosphahelicene  $S_0$  geometry (B3LYP/6-311+G(d,p)) in DCM solvent considered for benchmark.
13. Benchmarking the methodology for experimentally available absorption data.
14. Nearest low lying triplet state optimized for all considered systems in vacuum and four solvents.

ST1: Optimized Cartesian coordinates of  $S_0$ ,  $S_1$  and  $T_n$  geometries (B3LYP/6-311+G(d,p)) of all the systems considered in this work.

|              |           |           |           |              |           |           |           |
|--------------|-----------|-----------|-----------|--------------|-----------|-----------|-----------|
| P1234-vacuum |           |           |           | C1234-vacuum |           |           |           |
| C            | -2.670114 | -3.777477 | -1.011761 | C            | -2.449504 | -3.789561 | -1.030596 |
| C            | -1.900684 | -2.878116 | -1.771908 | C            | -1.678897 | -2.893765 | -1.792814 |
| H            | -1.414835 | -3.215033 | -2.680700 | H            | -1.181233 | -3.238354 | -2.692465 |
| C            | -3.349945 | -3.315252 | 0.093008  | C            | -3.147899 | -3.318002 | 0.058914  |
| H            | -3.996589 | -3.979453 | 0.657053  | H            | -3.796850 | -3.979999 | 0.622848  |
| C            | -1.767313 | -1.562995 | -1.376522 | C            | -1.561407 | -1.572241 | -1.412288 |
| H            | -1.183713 | -0.891292 | -1.988121 | H            | -0.978477 | -0.901685 | -2.025724 |
| C            | -3.264190 | -1.959922 | 0.489749  | C            | -3.079154 | -1.957077 | 0.437937  |
| C            | -2.391866 | -1.070181 | -0.205762 | C            | -2.203453 | -1.069816 | -0.256284 |
| C            | -4.125555 | -1.454478 | 1.514733  | C            | -3.963184 | -1.444376 | 1.440494  |
| H            | -4.769649 | -2.148070 | 2.044629  | H            | -4.610857 | -2.136023 | 1.968511  |
| C            | -4.202724 | -0.119290 | 1.744268  | C            | -4.055326 | -0.107235 | 1.649576  |
| H            | -4.925491 | 0.279773  | 2.448125  | H            | -4.792802 | 0.295525  | 2.335816  |
| C            | -3.331559 | 0.803116  | 1.078999  | C            | -3.177303 | 0.813379  | 0.989900  |
| C            | -2.297092 | 0.324218  | 0.223784  | C            | -2.125424 | 0.331546  | 0.155879  |
| C            | -3.509303 | 2.194237  | 1.269253  | C            | -3.356245 | 2.203024  | 1.174867  |
| H            | -4.321512 | 2.536156  | 1.901669  | H            | -4.181376 | 2.547646  | 1.788815  |
| C            | -2.700328 | 3.090485  | 0.624118  | C            | -2.522920 | 3.097980  | 0.557015  |
| H            | -2.882782 | 4.156670  | 0.705106  | H            | -2.699982 | 4.164680  | 0.642429  |
| C            | -1.566964 | 2.644181  | -0.095622 | C            | -1.374111 | 2.649075  | -0.132924 |
| C            | -1.287316 | 1.259689  | -0.197130 | C            | -1.108328 | 1.262809  | -0.246959 |
| C            | -0.699677 | 3.631055  | -0.711007 | C            | -0.476124 | 3.648938  | -0.697993 |
| H            | -1.035040 | 4.663019  | -0.693840 | H            | -0.816145 | 4.679241  | -0.672363 |
| C            | 0.469303  | 3.303587  | -1.303129 | C            | 0.720474  | 3.341138  | -1.239299 |
| H            | 1.086989  | 4.054789  | -1.782608 | H            | 1.361391  | 4.104836  | -1.665570 |
| C            | 0.950449  | 1.950658  | -1.208727 | C            | 1.173316  | 1.977143  | -1.169635 |
| C            | 0.084739  | 0.910607  | -0.601973 | C            | 0.266407  | 0.917582  | -0.648687 |
| C            | 2.213291  | 1.520706  | -1.513215 | C            | 2.401116  | 1.452936  | -1.403541 |
| H            | 2.986369  | 2.136340  | -1.952319 | H            | 3.276533  | 1.980768  | -1.756145 |
| H            | -2.755502 | -4.814827 | -1.314926 | H            | -2.522406 | -4.831581 | -1.320668 |
| C            | 0.764059  | -0.257756 | -0.373820 | C            | 0.995006  | -0.220896 | -0.517438 |
| P            | 2.344677  | -0.240471 | -1.216163 | C            | 3.508077  | -0.414631 | -0.063517 |
| C            | 3.681164  | -0.492190 | 0.033445  | C            | 3.573324  | 0.140036  | 1.220955  |
| C            | 3.678494  | 0.169000  | 1.269710  | C            | 4.480463  | -1.342096 | -0.443032 |
| C            | 4.725611  | -1.371544 | -0.269463 | C            | 4.587275  | -0.225251 | 2.100384  |
| C            | 4.706190  | -0.047968 | 2.181953  | H            | 2.821792  | 0.859682  | 1.527779  |
| H            | 2.870658  | 0.849518  | 1.512818  | C            | 5.499413  | -1.710506 | 0.437672  |
| C            | 5.757366  | -1.585054 | 0.646225  | H            | 4.442680  | -1.782499 | -1.434418 |
| H            | 4.731732  | -1.891255 | -1.221256 | C            | 5.555671  | -1.153188 | 1.711525  |
| C            | 5.748054  | -0.924675 | 1.871377  | H            | 4.622997  | 0.212621  | 3.091924  |
| H            | 4.695804  | 0.466360  | 3.136641  | H            | 6.245293  | -2.433217 | 0.125551  |
| H            | 6.562640  | -2.268450 | 0.401003  | H            | 6.344857  | -1.438092 | 2.398159  |
| H            | 6.547266  | -1.091489 | 2.584912  | H            | 0.665055  | -1.172187 | -0.130371 |
| H            | 0.348956  | -1.143536 | 0.080768  | C            | 2.399069  | -0.004448 | -1.024077 |
|              |           |           |           | H            | 2.517548  | -0.606355 | -1.940296 |
| *****        |           |           |           | *****        |           |           |           |

|            |           |           |           |             |           |           |           |
|------------|-----------|-----------|-----------|-------------|-----------|-----------|-----------|
| P1234-CCl4 |           |           |           | C1234- CCl4 |           |           |           |
| C          | -2.670152 | -3.779606 | -1.012537 | C           | -2.449434 | -3.792017 | -1.028840 |
| C          | -1.898857 | -2.880001 | -1.771241 | C           | -1.675894 | -2.896977 | -1.789675 |

|   |           |           |           |   |           |           |           |
|---|-----------|-----------|-----------|---|-----------|-----------|-----------|
| H | -1.411369 | -3.217043 | -2.679107 | H | -1.175238 | -3.242662 | -2.687212 |
| C | -3.352068 | -3.317439 | 0.091469  | C | -3.150908 | -3.319245 | 0.058684  |
| H | -4.000039 | -3.981385 | 0.654188  | H | -3.801906 | -3.980261 | 0.621330  |
| C | -1.765820 | -1.564726 | -1.375153 | C | -1.558760 | -1.574940 | -1.409676 |
| H | -1.180596 | -0.893438 | -1.985741 | H | -0.972934 | -0.905952 | -2.022094 |
| C | -3.266611 | -1.961778 | 0.488518  | C | -3.082408 | -1.957632 | 0.436705  |
| C | -2.392925 | -1.071833 | -0.205484 | C | -2.204288 | -1.071072 | -0.255920 |
| C | -4.130070 | -1.456983 | 1.512579  | C | -3.969501 | -1.444398 | 1.436786  |
| H | -4.774657 | -2.151021 | 2.041168  | H | -4.618738 | -2.135770 | 1.963110  |
| C | -4.208041 | -0.121505 | 1.742278  | C | -4.061989 | -0.106788 | 1.644924  |
| H | -4.932191 | 0.277382  | 2.444754  | H | -4.801476 | 0.296705  | 2.328515  |
| C | -3.335841 | 0.801228  | 1.077982  | C | -3.181638 | 0.813208  | 0.986673  |
| C | -2.299675 | 0.322815  | 0.224211  | C | -2.127369 | 0.330880  | 0.155498  |
| C | -3.515169 | 2.192601  | 1.267877  | C | -3.361844 | 2.203235  | 1.170288  |
| H | -4.327994 | 2.533987  | 1.899622  | H | -4.188418 | 2.547952  | 1.782064  |
| C | -2.706513 | 3.089590  | 0.622679  | C | -2.527442 | 3.098259  | 0.553331  |
| H | -2.890262 | 4.155524  | 0.702954  | H | -2.705623 | 4.164823  | 0.636985  |
| C | -1.571840 | 2.643719  | -0.096056 | C | -1.376484 | 2.648968  | -0.133533 |
| C | -1.290263 | 1.259295  | -0.196047 | C | -1.109572 | 1.262491  | -0.245864 |
| C | -0.705365 | 3.631548  | -0.711889 | C | -0.477801 | 3.649577  | -0.697132 |
| H | -1.041803 | 4.663110  | -0.695656 | H | -0.817789 | 4.679829  | -0.671376 |
| C | 0.464567  | 3.304581  | -1.303298 | C | 0.719893  | 3.341685  | -1.236892 |
| H | 1.081808  | 4.055998  | -1.782989 | H | 1.361550  | 4.105398  | -1.662057 |
| C | 0.947173  | 1.951986  | -1.206868 | C | 1.172738  | 1.977461  | -1.166235 |
| C | 0.082900  | 0.911608  | -0.598501 | C | 0.266282  | 0.917791  | -0.644720 |
| C | 2.211092  | 1.523510  | -1.510478 | C | 2.401025  | 1.453537  | -1.399984 |
| H | 2.983938  | 2.139480  | -1.949670 | H | 3.275703  | 1.981734  | -1.754031 |
| H | -2.755202 | -4.816802 | -1.316244 | H | -2.521930 | -4.834187 | -1.318411 |
| C | 0.763830  | -0.255345 | -0.366922 | C | 0.995720  | -0.220136 | -0.511760 |
| P | 2.344691  | -0.236452 | -1.208260 | C | 3.510454  | -0.413835 | -0.061866 |
| C | 3.685832  | -0.490568 | 0.034935  | C | 3.572847  | 0.131915  | 1.226875  |
| C | 3.685371  | 0.165024  | 1.274509  | C | 4.489248  | -1.332032 | -0.449000 |
| C | 4.732096  | -1.365269 | -0.276555 | C | 4.590171  | -0.232751 | 2.103481  |
| C | 4.717573  | -0.052743 | 2.182020  | H | 2.817035  | 0.844235  | 1.540452  |
| H | 2.876791  | 0.841922  | 1.525177  | C | 5.511571  | -1.699754 | 0.428644  |
| C | 5.768298  | -1.579338 | 0.634389  | H | 4.453909  | -1.765260 | -1.443529 |
| H | 4.737305  | -1.880842 | -1.230534 | C | 5.564966  | -1.151327 | 1.707068  |
| C | 5.761434  | -0.924560 | 1.863032  | H | 4.623361  | 0.198182  | 3.098141  |
| H | 4.709026  | 0.457067  | 3.139063  | H | 6.262207  | -2.414978 | 0.110729  |
| H | 6.574863  | -2.258763 | 0.382750  | H | 6.356548  | -1.435826 | 2.391129  |
| H | 6.563973  | -1.091965 | 2.572597  | H | 0.666027  | -1.171843 | -0.125434 |
| H | 0.350286  | -1.141278 | 0.088883  | C | 2.399076  | -0.003798 | -1.019900 |
|   | *****     |           |           | H | 2.515749  | -0.605945 | -1.936077 |
|   |           |           |           |   |           | *****     |           |

| P1234-DCM |           |           |           | C1234-DCM |           |           |           |
|-----------|-----------|-----------|-----------|-----------|-----------|-----------|-----------|
| C         | -2.666450 | -3.782778 | -1.014053 | C         | -2.441575 | -3.796811 | -1.026868 |
| C         | -1.894624 | -2.881987 | -1.771629 | C         | -1.666024 | -2.901317 | -1.785856 |
| H         | -1.405724 | -3.218669 | -2.678862 | H         | -1.160726 | -3.247358 | -2.680573 |
| C         | -3.350561 | -3.321584 | 0.089512  | C         | -3.147755 | -3.323996 | 0.058145  |
| H         | -3.998571 | -3.986265 | 0.651164  | H         | -3.799851 | -3.985266 | 0.619087  |
| C         | -1.763073 | -1.566471 | -1.374649 | C         | -1.551842 | -1.578481 | -1.406493 |
| H         | -1.176986 | -0.894878 | -1.984213 | H         | -0.963332 | -0.910515 | -2.017474 |
| C         | -3.266898 | -1.965440 | 0.486936  | C         | -3.082086 | -1.961498 | 0.435181  |
| C         | -2.392852 | -1.074295 | -0.205724 | C         | -2.202585 | -1.074102 | -0.255473 |

|   |           |           |           |   |           |           |           |
|---|-----------|-----------|-----------|---|-----------|-----------|-----------|
| C | -4.132843 | -1.462152 | 1.510233  | C | -3.973536 | -1.449208 | 1.432476  |
| H | -4.777194 | -2.157098 | 2.037744  | H | -4.623463 | -2.141218 | 1.956959  |
| C | -4.212918 | -0.126415 | 1.740063  | C | -4.068542 | -0.111264 | 1.639786  |
| H | -4.938683 | 0.271584  | 2.441249  | H | -4.810814 | 0.291687  | 2.320550  |
| C | -3.340568 | 0.797531  | 1.076742  | C | -3.187042 | 0.809642  | 0.983433  |
| C | -2.302216 | 0.320646  | 0.224343  | C | -2.129266 | 0.328652  | 0.155331  |
| C | -3.522810 | 2.189021  | 1.266484  | C | -3.370723 | 2.199764  | 1.166239  |
| H | -4.336735 | 2.528984  | 1.897380  | H | -4.199398 | 2.543007  | 1.775804  |
| C | -2.714931 | 3.087581  | 0.621785  | C | -2.536402 | 3.096406  | 0.550813  |
| H | -2.900862 | 4.153074  | 0.701465  | H | -2.717106 | 4.162534  | 0.633394  |
| C | -1.578189 | 2.643251  | -0.095556 | C | -1.382504 | 2.648744  | -0.133080 |
| C | -1.293776 | 1.259072  | -0.194962 | C | -1.112157 | 1.262453  | -0.244208 |
| C | -0.712694 | 3.633212  | -0.710174 | C | -0.484864 | 3.651844  | -0.694947 |
| H | -1.050462 | 4.664211  | -0.693161 | H | -0.826936 | 4.681293  | -0.669185 |
| C | 0.458670  | 3.308014  | -1.300645 | C | 0.714655  | 3.346098  | -1.232849 |
| H | 1.075451  | 4.060613  | -1.779007 | H | 1.355588  | 4.111059  | -1.656844 |
| C | 0.943316  | 1.955854  | -1.203547 | C | 1.169962  | 1.982433  | -1.161336 |
| C | 0.080819  | 0.913931  | -0.595097 | C | 0.265477  | 0.920761  | -0.640254 |
| C | 2.208676  | 1.529863  | -1.506472 | C | 2.399562  | 1.460779  | -1.395287 |
| H | 2.980734  | 2.147148  | -1.945361 | H | 3.272174  | 1.990855  | -1.751805 |
| H | -2.750028 | -4.819894 | -1.318257 | H | -2.511555 | -4.839295 | -1.315774 |
| C | 0.764063  | -0.251597 | -0.361659 | C | 0.997531  | -0.215703 | -0.507189 |
| P | 2.345318  | -0.229167 | -1.201766 | C | 3.513277  | -0.408721 | -0.061845 |
| C | 3.690317  | -0.487512 | 0.035477  | C | 3.582473  | 0.138749  | 1.226252  |
| C | 3.693639  | 0.164373  | 1.277356  | C | 4.487242  | -1.331747 | -0.451209 |
| C | 4.735857  | -1.361150 | -0.282817 | C | 4.601429  | -0.228827 | 2.100604  |
| C | 4.729105  | -0.056051 | 2.181097  | H | 2.831413  | 0.855181  | 1.542248  |
| H | 2.886522  | 0.840819  | 1.534024  | C | 5.511113  | -1.702500 | 0.424054  |
| C | 5.775213  | -1.577807 | 0.624389  | H | 4.447101  | -1.765949 | -1.444985 |
| H | 4.739347  | -1.873606 | -1.238387 | C | 5.571236  | -1.152436 | 1.702080  |
| C | 5.772247  | -0.926873 | 1.855581  | H | 4.639902  | 0.203708  | 3.094367  |
| H | 4.723683  | 0.450883  | 3.139590  | H | 6.257769  | -2.421098 | 0.104456  |
| H | 6.581192  | -2.255904 | 0.367734  | H | 6.364011  | -1.439186 | 2.383797  |
| H | 6.577221  | -1.096235 | 2.561777  | H | 0.669351  | -1.169226 | -0.124037 |
| H | 0.352230  | -1.138696 | 0.093530  | C | 2.399798  | 0.003143  | -1.016812 |
|   | *****     |           |           | H | 2.514761  | -0.597363 | -1.934107 |
|   |           |           |           |   | *****     |           |           |

| P1234-DMSO |           |           |           | C1234-DMSO |           |           |           |
|------------|-----------|-----------|-----------|------------|-----------|-----------|-----------|
| C          | -2.662709 | -3.784705 | -1.014614 | C          | -2.435117 | -3.799509 | -1.026084 |
| C          | -1.891372 | -2.882995 | -1.771918 | C          | -1.659506 | -2.903222 | -1.784350 |
| H          | -1.401826 | -3.219306 | -2.678934 | H          | -1.152037 | -3.248970 | -2.677904 |
| C          | -3.347950 | -3.324283 | 0.088760  | C          | -3.143483 | -3.327316 | 0.057991  |
| H          | -3.995368 | -3.989735 | 0.650110  | H          | -3.795392 | -3.989298 | 0.618241  |
| C          | -1.761225 | -1.567279 | -1.374673 | C          | -1.547542 | -1.579986 | -1.405235 |
| H          | -1.175240 | -0.895205 | -1.983877 | H          | -0.958410 | -0.912039 | -2.015644 |
| C          | -3.265955 | -1.967838 | 0.486195  | C          | -3.079984 | -1.964435 | 0.434729  |
| C          | -2.392289 | -1.075730 | -0.206005 | C          | -2.200682 | -1.075971 | -0.255226 |
| C          | -4.133279 | -1.465524 | 1.509045  | C          | -3.973380 | -1.453243 | 1.431100  |
| H          | -4.777214 | -2.161076 | 2.036188  | H          | -4.623007 | -2.145955 | 1.954971  |
| C          | -4.214999 | -0.129703 | 1.738731  | C          | -4.070323 | -0.115257 | 1.638216  |
| H          | -4.941700 | 0.267605  | 2.439266  | H          | -4.813864 | 0.286840  | 2.318025  |
| C          | -3.343000 | 0.795161  | 1.075879  | C          | -3.189158 | 0.806744  | 0.982588  |
| C          | -2.303397 | 0.319386  | 0.224198  | C          | -2.129776 | 0.327145  | 0.155453  |
| C          | -3.527112 | 2.186612  | 1.265548  | C          | -3.375118 | 2.196750  | 1.165410  |

|       |           |           |           |       |           |           |           |
|-------|-----------|-----------|-----------|-------|-----------|-----------|-----------|
| H     | -4.341831 | 2.525588  | 1.895876  | H     | -4.204744 | 2.538715  | 1.774332  |
| C     | -2.719689 | 3.086185  | 0.621425  | C     | -2.541520 | 3.094723  | 0.550662  |
| H     | -2.906961 | 4.151418  | 0.700877  | H     | -2.723855 | 4.160546  | 0.633192  |
| C     | -1.581667 | 2.643018  | -0.094997 | C     | -1.386308 | 2.648630  | -0.132422 |
| C     | -1.295624 | 1.259038  | -0.194468 | C     | -1.113654 | 1.262607  | -0.243416 |
| C     | -0.716613 | 3.634320  | -0.708359 | C     | -0.489928 | 3.653434  | -0.693658 |
| H     | -1.055101 | 4.665003  | -0.690478 | H     | -0.833720 | 4.682247  | -0.667938 |
| C     | 0.455593  | 3.310416  | -1.298215 | C     | 0.710512  | 3.349512  | -1.230899 |
| H     | 1.072169  | 4.063893  | -1.775419 | H     | 1.350446  | 4.115488  | -1.654542 |
| C     | 0.941365  | 1.958520  | -1.201377 | C     | 1.167867  | 1.986423  | -1.159201 |
| C     | 0.079743  | 0.915470  | -0.593541 | C     | 0.264882  | 0.923152  | -0.638658 |
| C     | 2.207457  | 1.533970  | -1.504055 | C     | 2.398320  | 1.466560  | -1.393468 |
| H     | 2.979040  | 2.152161  | -1.942558 | H     | 3.269595  | 1.998044  | -1.751236 |
| H     | -2.744982 | -4.821882 | -1.318870 | H     | -2.503273 | -4.842162 | -1.314733 |
| C     | 0.764237  | -0.249447 | -0.359919 | C     | 0.998714  | -0.212360 | -0.506315 |
| P     | 2.345656  | -0.224795 | -1.199526 | C     | 3.514416  | -0.404758 | -0.062835 |
| C     | 3.692066  | -0.485524 | 0.035325  | C     | 3.591879  | 0.150107  | 1.221818  |
| C     | 3.698159  | 0.166247  | 1.277396  | C     | 4.479847  | -1.338121 | -0.449359 |
| C     | 4.735869  | -1.360729 | -0.284867 | C     | 4.610344  | -0.220384 | 2.095848  |
| C     | 4.734634  | -0.055936 | 2.179774  | H     | 2.848069  | 0.875044  | 1.535758  |
| H     | 2.892837  | 0.844235  | 1.535713  | C     | 5.503143  | -1.711913 | 0.425569  |
| C     | 5.776169  | -1.579190 | 0.621012  | H     | 4.433577  | -1.777853 | -1.440365 |
| H     | 4.737805  | -1.872817 | -1.240595 | C     | 5.571451  | -1.154543 | 1.700243  |
| C     | 5.775972  | -0.928473 | 1.852503  | H     | 4.655408  | 0.218175  | 3.086686  |
| H     | 4.731479  | 0.450986  | 3.138242  | H     | 6.243093  | -2.438353 | 0.108170  |
| H     | 6.580821  | -2.258280 | 0.362995  | H     | 6.363916  | -1.443480 | 2.381378  |
| H     | 6.581731  | -1.099127 | 2.557424  | H     | 0.671788  | -1.167229 | -0.125448 |
| H     | 0.353169  | -1.137449 | 0.094238  | C     | 2.400387  | 0.008678  | -1.016538 |
| ***** |           |           |           | H     | 2.514730  | -0.590460 | -1.934719 |
|       |           |           |           | ***** |           |           |           |

|                |           |           |           |                |           |           |           |
|----------------|-----------|-----------|-----------|----------------|-----------|-----------|-----------|
| P1234-n-hexane |           |           |           | C1234-n-hexane |           |           |           |
| C              | -2.670264 | -3.779193 | -1.012317 | C              | -2.449841 | -3.791427 | -1.029204 |
| C              | -1.899245 | -2.879679 | -1.771266 | C              | -1.676829 | -2.896297 | -1.790337 |
| H              | -1.412016 | -3.216723 | -2.679270 | H              | -1.176849 | -3.241805 | -2.688326 |
| C              | -3.351825 | -3.316963 | 0.091786  | C              | -3.150628 | -3.318835 | 0.058741  |
| H              | -3.999622 | -3.980907 | 0.654731  | H              | -3.801275 | -3.979980 | 0.621661  |
| C              | -1.766125 | -1.564428 | -1.375337 | C              | -1.559493 | -1.574374 | -1.410226 |
| H              | -1.181166 | -0.893098 | -1.986113 | H              | -0.974226 | -0.905105 | -2.022868 |
| C              | -3.266273 | -1.961365 | 0.488757  | C              | -3.081946 | -1.957365 | 0.436958  |
| C              | -2.392787 | -1.071504 | -0.205507 | C              | -2.204250 | -1.070744 | -0.256002 |
| C              | -4.129361 | -1.456407 | 1.512947  | C              | -3.968376 | -1.444167 | 1.437543  |
| H              | -4.773896 | -2.150345 | 2.041756  | H              | -4.617348 | -2.135552 | 1.964203  |
| C              | -4.207147 | -0.120981 | 1.742597  | C              | -4.060695 | -0.106640 | 1.645858  |
| H              | -4.931056 | 0.277975  | 2.445297  | H              | -4.799754 | 0.296771  | 2.329973  |
| C              | -3.335090 | 0.801651  | 1.078135  | C              | -3.180743 | 0.813402  | 0.987298  |
| C              | -2.299233 | 0.323102  | 0.224135  | C              | -2.126995 | 0.331083  | 0.155554  |
| C              | -3.514081 | 2.192982  | 1.268069  | C              | -3.360608 | 2.203369  | 1.171143  |
| H              | -4.326792 | 2.534504  | 1.899919  | H              | -4.186870 | 2.548143  | 1.783341  |
| C              | -2.705333 | 3.089796  | 0.622874  | C              | -2.526363 | 3.098308  | 0.553974  |
| H              | -2.888813 | 4.155785  | 0.703263  | H              | -2.704277 | 4.164910  | 0.637924  |
| C              | -1.570916 | 2.643798  | -0.096030 | C              | -1.375854 | 2.648995  | -0.133474 |
| C              | -1.289723 | 1.259356  | -0.196236 | C              | -1.109269 | 1.262540  | -0.246112 |
| C              | -0.704278 | 3.631391  | -0.711854 | C              | -0.477214 | 3.649381  | -0.697351 |
| H              | -1.040517 | 4.663032  | -0.695559 | H              | -0.817098 | 4.679683  | -0.671603 |

|       |           |           |           |       |           |           |           |
|-------|-----------|-----------|-----------|-------|-----------|-----------|-----------|
| C     | 0.465465  | 3.304273  | -1.303383 | C     | 0.720238  | 3.341399  | -1.237416 |
| H     | 1.082789  | 4.055601  | -1.783115 | H     | 1.361838  | 4.105049  | -1.662778 |
| C     | 0.947783  | 1.951619  | -1.207245 | C     | 1.172955  | 1.977177  | -1.166955 |
| C     | 0.083232  | 0.911365  | -0.599093 | C     | 0.266342  | 0.917619  | -0.645514 |
| C     | 2.211487  | 1.522821  | -1.510992 | C     | 2.401110  | 1.453109  | -1.400717 |
| H     | 2.984421  | 2.138669  | -1.950171 | H     | 3.276002  | 1.981163  | -1.754416 |
| H     | -2.755407 | -4.816420 | -1.315913 | H     | -2.522527 | -4.833557 | -1.318887 |
| C     | 0.763834  | -0.255842 | -0.368037 | C     | 0.995528  | -0.220461 | -0.512796 |
| P     | 2.344634  | -0.237346 | -1.209583 | C     | 3.509973  | -0.414195 | -0.062100 |
| C     | 3.685001  | -0.490923 | 0.034722  | C     | 3.572388  | 0.132677  | 1.226094  |
| C     | 3.684078  | 0.165576  | 1.273753  | C     | 4.488141  | -1.333429 | -0.448068 |
| C     | 4.731078  | -1.366257 | -0.275340 | C     | 4.589150  | -0.231943 | 2.103219  |
| C     | 4.715559  | -0.051933 | 2.182037  | H     | 2.816924  | 0.845805  | 1.538621  |
| H     | 2.875502  | 0.842943  | 1.523154  | C     | 5.509905  | -1.701102 | 0.430125  |
| C     | 5.766575  | -1.580100 | 0.636376  | H     | 4.452721  | -1.767585 | -1.442213 |
| H     | 4.736466  | -1.882524 | -1.228957 | C     | 5.563327  | -1.151547 | 1.707953  |
| C     | 5.759213  | -0.924405 | 1.864436  | H     | 4.622397  | 0.199856  | 3.097502  |
| H     | 4.706629  | 0.458602  | 3.138707  | H     | 6.260100  | -2.417187 | 0.113100  |
| H     | 6.573011  | -2.260092 | 0.385800  | H     | 6.354510  | -1.435997 | 2.392495  |
| H     | 6.561222  | -1.091620 | 2.574665  | H     | 0.665735  | -1.172024 | -0.126213 |
| H     | 0.349995  | -1.141696 | 0.087637  | C     | 2.399038  | -0.004225 | -1.020644 |
| ***** |           |           |           | H     | 2.516049  | -0.606420 | -1.936772 |
|       |           |           |           | ***** |           |           |           |

| 1P234-vacuum |           |           |           | 1C234-vacuum |           |           |           |
|--------------|-----------|-----------|-----------|--------------|-----------|-----------|-----------|
| C            | 5.573218  | 1.031547  | 0.103795  | C            | 5.522619  | 0.987974  | 0.021353  |
| C            | 4.508203  | 1.715755  | -0.507429 | C            | 4.451143  | 1.711479  | -0.528949 |
| H            | 4.670141  | 2.699053  | -0.934562 | H            | 4.617614  | 2.704875  | -0.930396 |
| C            | 5.375328  | -0.252036 | 0.565148  | C            | 5.315962  | -0.307426 | 0.445915  |
| H            | 6.201224  | -0.816654 | 0.985344  | H            | 6.145254  | -0.900771 | 0.817029  |
| C            | 3.256815  | 1.136859  | -0.582926 | C            | 3.186681  | 1.157173  | -0.579393 |
| H            | 2.463479  | 1.671269  | -1.085504 | H            | 2.389304  | 1.716495  | -1.046179 |
| C            | 4.113153  | -0.879695 | 0.459702  | C            | 4.039156  | -0.907533 | 0.366407  |
| C            | 2.999933  | -0.149364 | -0.053679 | C            | 2.923565  | -0.139545 | -0.082487 |
| C            | 3.967609  | -2.270853 | 0.766577  | C            | 3.875774  | -2.305249 | 0.634963  |
| H            | 4.820362  | -2.807524 | 1.168592  | H            | 4.733039  | -2.871903 | 0.982621  |
| C            | 2.815141  | -2.922053 | 0.469545  | C            | 2.696483  | -2.922011 | 0.373675  |
| H            | 2.735423  | -3.994561 | 0.612187  | H            | 2.598049  | -3.995778 | 0.493764  |
| C            | 1.666375  | -2.221579 | -0.027686 | C            | 1.540380  | -2.182559 | -0.046572 |
| C            | 1.695712  | -0.798056 | -0.138978 | C            | 1.603452  | -0.756856 | -0.134386 |
| C            | 0.514767  | -2.948966 | -0.406600 | C            | 0.345433  | -2.871995 | -0.350497 |
| H            | 0.534776  | -4.031162 | -0.334199 | H            | 0.342840  | -3.955329 | -0.294439 |
| C            | -0.595589 | -2.301440 | -0.898535 | C            | -0.793924 | -2.189934 | -0.721930 |
| H            | -1.448158 | -2.865025 | -1.260849 | H            | -1.700758 | -2.722528 | -0.985231 |
| C            | -0.640679 | -0.901393 | -0.847247 | C            | -0.781776 | -0.794356 | -0.670736 |
| C            | 0.445813  | -0.139328 | -0.380596 | C            | 0.362885  | -0.070206 | -0.307904 |
| C            | -1.255555 | 1.567564  | -0.581665 | C            | -1.415537 | 1.460449  | -0.454907 |
| H            | 6.549967  | 1.496152  | 0.176916  | H            | 6.510267  | 1.431703  | 0.075499  |
| C            | -3.433507 | -0.297974 | -0.280472 | C            | -3.278980 | -0.291174 | -0.306048 |
| C            | -4.378398 | -0.741780 | 1.906677  | C            | -4.602381 | -0.832871 | 1.653920  |
| C            | -4.688299 | -0.533821 | -0.852353 | C            | -4.402860 | -0.527869 | -1.101030 |
| C            | -5.627784 | -0.974439 | 1.326938  | C            | -5.719837 | -1.066625 | 0.849887  |
| C            | -5.782049 | -0.870068 | -0.052226 | C            | -5.617115 | -0.913096 | -0.529392 |
| H            | -4.810149 | -0.454514 | -1.927489 | H            | -4.329969 | -0.410521 | -2.177803 |
| H            | -6.749312 | -1.049914 | -0.508210 | H            | -6.478376 | -1.092076 | -1.163576 |

|   |           |           |           |   |           |           |           |
|---|-----------|-----------|-----------|---|-----------|-----------|-----------|
| P | -2.034351 | 0.138676  | -1.418985 | C | -0.061238 | 1.336430  | -0.081479 |
| C | 0.041431  | 1.264172  | -0.106977 | C | 0.568233  | 2.427103  | 0.531743  |
| C | 0.699953  | 2.227333  | 0.673467  | C | -0.129488 | 3.623268  | 0.694065  |
| C | 0.108761  | 3.464478  | 0.910010  | C | -1.449553 | 3.750942  | 0.259102  |
| C | -1.143453 | 3.774799  | 0.374306  | C | -2.103554 | 2.656519  | -0.308103 |
| C | -1.828798 | 2.820062  | -0.371898 | H | 1.580863  | 2.352937  | 0.901730  |
| H | 1.663408  | 2.012718  | 1.113806  | H | 0.362180  | 4.462653  | 1.173303  |
| H | 0.628792  | 4.192490  | 1.522697  | H | -1.974937 | 4.690479  | 0.387975  |
| H | -1.589459 | 4.745869  | 0.557245  | H | -3.145838 | 2.729268  | -0.599615 |
| H | -2.816926 | 3.040671  | -0.761534 | C | -3.394441 | -0.448772 | 1.081090  |
| C | -3.288910 | -0.405505 | 1.109819  | H | -6.660798 | -1.365778 | 1.297734  |
| H | -6.475113 | -1.236095 | 1.950956  | H | -4.674326 | -0.950230 | 2.729611  |
| H | -4.255478 | -0.822652 | 2.981187  | H | -2.531577 | -0.268507 | 1.713285  |
| H | -2.322852 | -0.225564 | 1.567910  | C | -1.959925 | 0.128374  | -0.933927 |
|   | *****     |           |           | H | -2.109783 | 0.175214  | -2.021583 |
|   | *****     |           |           |   | *****     |           |           |

| 1P234-CCI4 |           |           |           | 1C234-CCI4 |           |           |           |
|------------|-----------|-----------|-----------|------------|-----------|-----------|-----------|
| C          | 5.575285  | 1.033735  | 0.102923  | C          | 5.523193  | 0.990155  | 0.026457  |
| C          | 4.509616  | 1.718214  | -0.507713 | C          | 4.451856  | 1.714409  | -0.524059 |
| H          | 4.671116  | 2.701943  | -0.933927 | H          | 4.618378  | 2.708645  | -0.923287 |
| C          | 5.378025  | -0.250519 | 0.563861  | C          | 5.316534  | -0.306324 | 0.449074  |
| H          | 6.204179  | -0.815186 | 0.983323  | H          | 6.145574  | -0.899922 | 0.820187  |
| C          | 3.258099  | 1.138881  | -0.582985 | C          | 3.187359  | 1.159649  | -0.576637 |
| H          | 2.464779  | 1.673890  | -1.084966 | H          | 2.390658  | 1.720125  | -1.043157 |
| C          | 4.115527  | -0.878384 | 0.458375  | C          | 4.039546  | -0.906658 | 0.367082  |
| C          | 3.001763  | -0.147924 | -0.054324 | C          | 2.923975  | -0.138142 | -0.082026 |
| C          | 3.971095  | -2.270196 | 0.764723  | C          | 3.876815  | -2.305234 | 0.633639  |
| H          | 4.824300  | -2.806581 | 1.165972  | H          | 4.733843  | -2.871920 | 0.981641  |
| C          | 2.818585  | -2.921945 | 0.467668  | C          | 2.697842  | -2.922249 | 0.369729  |
| H          | 2.739253  | -3.994566 | 0.609073  | H          | 2.599518  | -3.996198 | 0.487699  |
| C          | 1.669086  | -2.221139 | -0.028505 | C          | 1.541796  | -2.182139 | -0.050737 |
| C          | 1.697527  | -0.797274 | -0.139251 | C          | 1.603823  | -0.755999 | -0.136043 |
| C          | 0.517715  | -2.949700 | -0.406929 | C          | 0.347716  | -2.872476 | -0.357643 |
| H          | 0.538590  | -4.031802 | -0.334668 | H          | 0.346235  | -3.955878 | -0.304103 |
| C          | -0.593650 | -2.302538 | -0.898011 | C          | -0.791948 | -2.190318 | -0.728881 |
| H          | -1.445693 | -2.866959 | -1.260151 | H          | -1.697255 | -2.723799 | -0.995542 |
| C          | -0.639389 | -0.902275 | -0.845917 | C          | -0.781526 | -0.794546 | -0.674106 |
| C          | 0.446859  | -0.139197 | -0.379802 | C          | 0.362539  | -0.069917 | -0.309471 |
| C          | -1.256026 | 1.567009  | -0.579228 | C          | -1.417282 | 1.459296  | -0.456096 |
| H          | 6.551857  | 1.498662  | 0.175914  | H          | 6.510584  | 1.434179  | 0.082396  |
| C          | -3.435903 | -0.300264 | -0.280988 | C          | -3.278760 | -0.293452 | -0.304814 |
| C          | -4.382121 | -0.755886 | 1.903642  | C          | -4.597450 | -0.843156 | 1.656944  |
| C          | -4.693010 | -0.521757 | -0.854231 | C          | -4.406406 | -0.520508 | -1.097746 |
| C          | -5.634058 | -0.973767 | 1.322839  | C          | -5.718957 | -1.067103 | 0.855109  |
| C          | -5.788766 | -0.856317 | -0.055649 | C          | -5.620344 | -0.904776 | -0.523968 |
| H          | -4.816193 | -0.432953 | -1.928402 | H          | -4.336941 | -0.396542 | -2.173879 |
| H          | -6.757673 | -1.024857 | -0.512315 | H          | -6.484489 | -1.076232 | -1.156300 |
| P          | -2.034399 | 0.137061  | -1.415308 | C          | -0.062865 | 1.336322  | -0.081977 |
| C          | 0.041587  | 1.264074  | -0.105465 | C          | 0.565727  | 2.427561  | 0.531667  |
| C          | 0.699949  | 2.227423  | 0.675052  | C          | -0.132717 | 3.623679  | 0.693873  |
| C          | 0.108213  | 3.464482  | 0.912576  | C          | -1.452864 | 3.750614  | 0.257618  |
| C          | -1.144678 | 3.774451  | 0.377365  | C          | -2.105939 | 2.655474  | -0.310174 |
| C          | -1.830151 | 2.819357  | -0.369035 | H          | 1.578389  | 2.354995  | 0.901828  |
| H          | 1.663772  | 2.013770  | 1.115035  | H          | 0.358360  | 4.463340  | 1.173191  |

|       |           |           |           |       |           |           |           |
|-------|-----------|-----------|-----------|-------|-----------|-----------|-----------|
| H     | 0.628212  | 4.192482  | 1.525236  | H     | -1.978835 | 4.689936  | 0.385658  |
| H     | -1.591097 | 4.745211  | 0.560756  | H     | -3.147613 | 2.728692  | -0.603718 |
| H     | -2.818490 | 3.040147  | -0.758000 | C     | -3.389758 | -0.459892 | 1.081905  |
| C     | -3.290577 | -0.420998 | 1.108374  | H     | -6.659513 | -1.365534 | 1.304305  |
| H     | -6.482794 | -1.234277 | 1.945323  | H     | -4.665833 | -0.967466 | 2.732080  |
| H     | -4.258701 | -0.847134 | 2.977198  | H     | -2.524405 | -0.287829 | 1.713100  |
| H     | -2.323060 | -0.252981 | 1.568010  | C     | -1.960854 | 0.126949  | -0.935334 |
| ***** |           |           |           | H     | -2.112960 | 0.174081  | -2.022417 |
| ***** |           |           |           | ***** |           |           |           |

| 1P234-DCM |           |           |           | 1C234-DCM |           |           |           |
|-----------|-----------|-----------|-----------|-----------|-----------|-----------|-----------|
| C         | 5.577660  | 1.035931  | 0.101421  | C         | 5.522675  | 0.992932  | 0.038399  |
| C         | 4.510995  | 1.721183  | -0.507467 | C         | 4.452233  | 1.718637  | -0.512901 |
| H         | 4.671819  | 2.705756  | -0.931848 | H         | 4.619184  | 2.714433  | -0.907834 |
| C         | 5.381191  | -0.249217 | 0.561433  | C         | 5.315588  | -0.305312 | 0.456786  |
| H         | 6.207782  | -0.814057 | 0.979539  | H         | 6.143912  | -0.899554 | 0.828210  |
| C         | 3.259211  | 1.141588  | -0.582008 | C         | 3.187812  | 1.163374  | -0.570314 |
| H         | 2.465586  | 1.677954  | -1.082065 | H         | 2.392510  | 1.725831  | -1.036769 |
| C         | 4.118226  | -0.877148 | 0.456380  | C         | 4.038590  | -0.905940 | 0.369448  |
| C         | 3.003631  | -0.146220 | -0.054746 | C         | 2.923537  | -0.136308 | -0.080402 |
| C         | 3.974943  | -2.269690 | 0.761931  | C         | 3.876426  | -2.305893 | 0.631390  |
| H         | 4.828592  | -2.805903 | 1.162250  | H         | 4.732772  | -2.873072 | 0.980043  |
| C         | 2.822276  | -2.921980 | 0.465123  | C         | 2.698307  | -2.923009 | 0.361990  |
| H         | 2.743583  | -3.994704 | 0.605431  | H         | 2.600424  | -3.997374 | 0.475697  |
| C         | 1.671965  | -2.220670 | -0.029758 | C         | 1.542716  | -2.181698 | -0.059085 |
| C         | 1.699362  | -0.796309 | -0.139248 | C         | 1.603453  | -0.754863 | -0.139470 |
| C         | 0.520945  | -2.950270 | -0.408575 | C         | 0.350129  | -2.872763 | -0.372139 |
| H         | 0.542605  | -4.032311 | -0.337427 | H         | 0.350050  | -3.956323 | -0.323740 |
| C         | -0.591344 | -2.303220 | -0.898697 | C         | -0.789485 | -2.190048 | -0.743381 |
| H         | -1.442480 | -2.868449 | -1.261602 | H         | -1.692458 | -2.724080 | -1.016663 |
| C         | -0.638106 | -0.902739 | -0.844644 | C         | -0.781397 | -0.794184 | -0.682145 |
| C         | 0.447775  | -0.138815 | -0.378389 | C         | 0.361468  | -0.069257 | -0.313502 |
| C         | -1.256748 | 1.566667  | -0.575664 | C         | -1.419994 | 1.458302  | -0.460908 |
| H         | 6.554074  | 1.501094  | 0.174161  | H         | 6.509595  | 1.437324  | 0.098473  |
| C         | -3.438452 | -0.302678 | -0.281678 | C         | -3.277408 | -0.296314 | -0.302725 |
| C         | -4.385277 | -0.776293 | 1.899476  | C         | -4.584642 | -0.855618 | 1.665113  |
| C         | -4.698606 | -0.505066 | -0.855857 | C         | -4.411480 | -0.513197 | -1.089735 |
| C         | -5.640534 | -0.974682 | 1.317948  | C         | -5.712875 | -1.069300 | 0.869224  |
| C         | -5.796398 | -0.838565 | -0.059123 | C         | -5.623018 | -0.897049 | -0.509781 |
| H         | -4.823761 | -0.402566 | -1.928479 | H         | -4.349168 | -0.381736 | -2.165219 |
| H         | -6.767500 | -0.992094 | -0.516191 | H         | -6.492109 | -1.060629 | -1.137348 |
| P         | -2.034498 | 0.136020  | -1.411284 | C         | -0.065872 | 1.336457  | -0.084405 |
| C         | 0.041492  | 1.264142  | -0.102732 | C         | 0.560982  | 2.428573  | 0.530124  |
| C         | 0.699721  | 2.227738  | 0.677853  | C         | -0.138439 | 3.624684  | 0.691119  |
| C         | 0.107464  | 3.464742  | 0.916336  | C         | -1.458062 | 3.750815  | 0.251651  |
| C         | -1.146079 | 3.774389  | 0.381579  | C         | -2.109335 | 2.654807  | -0.317479 |
| C         | -1.831688 | 2.818969  | -0.365094 | H         | 1.573505  | 2.358364  | 0.901009  |
| H         | 1.664050  | 2.015325  | 1.117275  | H         | 0.351622  | 4.464867  | 1.170450  |
| H         | 0.627484  | 4.192870  | 1.528699  | H         | -1.984490 | 4.690193  | 0.377188  |
| H         | -1.592737 | 4.744937  | 0.565142  | H         | -3.149580 | 2.728774  | -0.615866 |
| H         | -2.819988 | 3.040222  | -0.753869 | C         | -3.379262 | -0.472658 | 1.083797  |
| C         | -3.291639 | -0.442041 | 1.106083  | H         | -6.651402 | -1.367543 | 1.322726  |
| H         | -6.490665 | -1.234766 | 1.938551  | H         | -4.645799 | -0.987840 | 2.739732  |
| H         | -4.260891 | -0.882315 | 2.971486  | H         | -2.509217 | -0.309280 | 1.711040  |
| H         | -2.322007 | -0.289769 | 1.566920  | C         | -1.962557 | 0.125640  | -0.939874 |

|            |            |           |           |           |           |           |           |
|------------|------------|-----------|-----------|-----------|-----------|-----------|-----------|
| *****      | H          | -2.119893 | 0.172793  | -2.025887 | *****     |           |           |
| 1P234-DMSO | 1C234-DMSO |           |           |           |           |           |           |
| C          | C          | 5.578717  | 1.035943  | 0.100403  | 5.522162  | 0.993971  | 0.045354  |
| C          | C          | 4.511704  | 1.721670  | -0.507665 | 4.452359  | 1.720576  | -0.506347 |
| H          | H          | 4.672368  | 2.706550  | -0.931325 | 4.619649  | 2.717226  | -0.898868 |
| C          | C          | 5.382354  | -0.249439 | 0.560264  | 5.314692  | -0.305189 | 0.461223  |
| H          | H          | 6.209047  | -0.814412 | 0.977860  | 6.142557  | -0.899894 | 0.832804  |
| C          | C          | 3.259679  | 1.142236  | -0.581626 | 3.187988  | 1.165190  | -0.566581 |
| H          | H          | 2.465937  | 1.679364  | -1.080686 | 2.393524  | 1.728757  | -1.033061 |
| C          | C          | 4.119061  | -0.877156 | 0.455689  | 4.037722  | -0.905856 | 0.370855  |
| C          | C          | 3.004217  | -0.145894 | -0.054798 | 2.923070  | -0.135503 | -0.079372 |
| C          | C          | 3.975943  | -2.269882 | 0.761249  | 3.875659  | -2.306489 | 0.630072  |
| H          | H          | 4.829629  | -2.806095 | 1.161403  | 4.731581  | -2.874099 | 0.978974  |
| C          | C          | 2.823091  | -2.922253 | 0.464723  | 2.698009  | -2.923480 | 0.357634  |
| H          | H          | 2.744521  | -3.994951 | 0.605014  | 2.600335  | -3.998077 | 0.468956  |
| C          | C          | 1.672597  | -2.220647 | -0.029877 | 1.542758  | -2.181458 | -0.063727 |
| C          | C          | 1.699820  | -0.796082 | -0.138999 | 1.603001  | -0.754278 | -0.141381 |
| C          | C          | 0.521621  | -2.950444 | -0.409028 | 0.350960  | -2.872680 | -0.380231 |
| H          | H          | 0.543314  | -4.032467 | -0.338390 | 0.351514  | -3.956329 | -0.334782 |
| C          | C          | -0.590857 | -2.303265 | -0.898967 | -0.788508 | -2.189579 | -0.751506 |
| H          | H          | -1.441608 | -2.868747 | -1.262364 | -1.690294 | -2.723649 | -1.028544 |
| C          | C          | -0.637861 | -0.902675 | -0.844101 | -0.781477 | -0.793735 | -0.686778 |
| C          | C          | 0.447988  | -0.138607 | -0.377690 | 0.360757  | -0.068753 | -0.315854 |
| C          | C          | -1.256867 | 1.566865  | -0.574310 | -1.421378 | 1.458127  | -0.463871 |
| H          | H          | 6.555156  | 1.501018  | 0.172901  | 6.508858  | 1.438456  | 0.107810  |
| C          | C          | -3.439434 | -0.303048 | -0.281944 | -3.276463 | -0.297608 | -0.301650 |
| C          | C          | -4.386787 | -0.781675 | 1.898161  | -4.576863 | -0.861371 | 1.669965  |
| C          | C          | -4.700155 | -0.500808 | -0.856662 | -4.413913 | -0.510423 | -1.085017 |
| C          | C          | -5.642688 | -0.975467 | 1.316121  | -5.708599 | -1.070921 | 0.877682  |
| C          | C          | -5.798538 | -0.834473 | -0.060623 | -5.623760 | -0.894384 | -0.501300 |
| H          | H          | -4.825718 | -0.394738 | -1.928840 | -4.355659 | -0.375699 | -2.160221 |
| H          | H          | -6.770000 | -0.984418 | -0.518004 | -6.495470 | -1.054818 | -1.126002 |
| P          | C          | -2.034582 | 0.136144  | -1.409798 | -0.067483 | 1.336725  | -0.085972 |
| C          | C          | 0.041563  | 1.264331  | -0.101611 | 0.558414  | 2.429312  | 0.529038  |
| C          | C          | 0.699928  | 2.228056  | 0.678828  | -0.141474 | 3.625426  | 0.689169  |
| C          | C          | 0.107699  | 3.465200  | 0.917431  | -1.460655 | 3.751267  | 0.247787  |
| C          | C          | -1.146020 | 3.774869  | 0.382771  | -2.110983 | 2.654858  | -0.322020 |
| C          | H          | -1.831864 | 2.819324  | -0.363848 | 1.570829  | 2.360298  | 0.900384  |
| H          | H          | 1.664464  | 2.016113  | 1.117996  | 0.348101  | 4.465905  | 1.168414  |
| H          | H          | 0.627904  | 4.193438  | 1.529440  | -1.987145 | 4.690817  | 0.371654  |
| H          | H          | -1.592519 | 4.745501  | 0.566092  | -3.150366 | 2.729219  | -0.623289 |
| H          | C          | -2.820018 | 3.040936  | -0.752787 | -3.373135 | -0.478265 | 1.084841  |
| C          | H          | -3.292512 | -0.447183 | 1.105446  | -6.645753 | -1.369351 | 1.333859  |
| H          | H          | -6.493219 | -1.235821 | 1.935989  | -4.633953 | -0.997068 | 2.744371  |
| H          | H          | -4.262408 | -0.891588 | 2.969750  | -2.500511 | -0.318445 | 1.709534  |
| H          | C          | -2.322518 | -0.298813 | 1.566896  | -1.963520 | 0.125259  | -0.942662 |
| *****      | H          | -2.123845 | 0.172299  | -2.028092 | *****     |           |           |

|                |                |          |           |           |          |           |           |
|----------------|----------------|----------|-----------|-----------|----------|-----------|-----------|
| 1P234-n-hexane | 1C234-n-hexane |          |           |           |          |           |           |
| C              | C              | 5.574892 | 1.033237  | 0.103100  | 5.523117 | 0.989785  | 0.025166  |
| C              | C              | 4.509384 | 1.717632  | -0.507749 | 4.451706 | 1.713844  | -0.525287 |
| H              | H              | 4.671002 | 2.701237  | -0.934228 | 4.618183 | 2.707884  | -0.925045 |
| C              | C              | 5.377474 | -0.250856 | 0.564194  | 5.316503 | -0.306462 | 0.448258  |

|   |           |           |           |   |           |           |           |
|---|-----------|-----------|-----------|---|-----------|-----------|-----------|
| H | 6.203553  | -0.815509 | 0.983860  | H | 6.145623  | -0.899978 | 0.819361  |
| C | 3.257889  | 1.138393  | -0.583082 | C | 3.187222  | 1.159145  | -0.577337 |
| H | 2.464601  | 1.673238  | -1.085285 | H | 2.390347  | 1.719342  | -1.043907 |
| C | 4.115034  | -0.878670 | 0.458703  | C | 4.039555  | -0.906775 | 0.366866  |
| C | 3.001410  | -0.148253 | -0.054214 | C | 2.923945  | -0.138406 | -0.082174 |
| C | 3.970363  | -2.270342 | 0.765215  | C | 3.876730  | -2.305170 | 0.633915  |
| H | 4.823471  | -2.806771 | 1.166647  | H | 4.733833  | -2.871814 | 0.981837  |
| C | 2.817859  | -2.921976 | 0.468158  | C | 2.697681  | -2.922161 | 0.370630  |
| H | 2.738412  | -3.994569 | 0.609828  | H | 2.599336  | -3.996068 | 0.489087  |
| C | 1.668516  | -2.221239 | -0.028261 | C | 1.541596  | -2.182218 | -0.049771 |
| C | 1.697165  | -0.797452 | -0.139201 | C | 1.603807  | -0.756176 | -0.135655 |
| C | 0.517080  | -2.949578 | -0.406696 | C | 0.347330  | -2.872411 | -0.355959 |
| H | 0.537771  | -4.031694 | -0.334313 | H | 0.345650  | -3.955796 | -0.301820 |
| C | -0.594091 | -2.302354 | -0.897965 | C | -0.792309 | -2.190312 | -0.727208 |
| H | -1.446272 | -2.866614 | -1.260053 | H | -1.697943 | -2.723651 | -0.993053 |
| C | -0.639650 | -0.902131 | -0.846144 | C | -0.781550 | -0.794569 | -0.673240 |
| C | 0.446670  | -0.139238 | -0.379999 | C | 0.362646  | -0.070011 | -0.309054 |
| C | -1.255898 | 1.567120  | -0.579807 | C | -1.416916 | 1.459468  | -0.455678 |
| H | 6.551505  | 1.498093  | 0.176112  | H | 6.510558  | 1.433769  | 0.080657  |
| C | -3.435440 | -0.299770 | -0.280871 | C | -3.278854 | -0.293037 | -0.305085 |
| C | -4.381549 | -0.752297 | 1.904350  | C | -4.598756 | -0.841253 | 1.656098  |
| C | -4.691960 | -0.524752 | -0.853927 | C | -4.405702 | -0.521743 | -1.098589 |
| C | -5.632845 | -0.973760 | 1.323684  | C | -5.719413 | -1.066876 | 0.853670  |
| C | -5.787324 | -0.859615 | -0.055029 | C | -5.619823 | -0.906118 | -0.525422 |
| H | -4.814774 | -0.438362 | -1.928352 | H | -4.335427 | -0.398957 | -2.174832 |
| H | -6.755802 | -1.030899 | -0.511615 | H | -6.483357 | -1.078860 | -1.158244 |
| P | -2.034390 | 0.137344  | -1.416035 | C | -0.062500 | 1.336306  | -0.081773 |
| C | 0.041599  | 1.264094  | -0.105876 | C | 0.566293  | 2.427421  | 0.531777  |
| C | 0.700001  | 2.227409  | 0.674611  | C | -0.132010 | 3.623541  | 0.694061  |
| C | 0.108382  | 3.464496  | 0.911929  | C | -1.452174 | 3.750607  | 0.258147  |
| C | -1.144378 | 3.774538  | 0.376622  | C | -2.105462 | 2.655605  | -0.309494 |
| C | -1.829843 | 2.819502  | -0.369716 | H | 1.578957  | 2.354520  | 0.901878  |
| H | 1.663743  | 2.013552  | 1.114679  | H | 0.359193  | 4.463139  | 1.173372  |
| H | 0.628400  | 4.192492  | 1.524595  | H | -1.978054 | 4.689946  | 0.386440  |
| H | -1.590715 | 4.745362  | 0.559920  | H | -3.147300 | 2.728705  | -0.602487 |
| H | -2.818155 | 3.040248  | -0.758782 | C | -3.390895 | -0.457905 | 1.081688  |
| C | -3.290402 | -0.417187 | 1.108755  | H | -6.660141 | -1.365379 | 1.302458  |
| H | -6.481310 | -1.234447 | 1.946485  | H | -4.667969 | -0.964321 | 2.731325  |
| H | -4.258325 | -0.840934 | 2.978160  | H | -2.526088 | -0.284431 | 1.713215  |
| H | -2.323287 | -0.246299 | 1.568158  | C | -1.960637 | 0.127165  | -0.934903 |
|   | *****     |           |           | H | -2.112169 | 0.174261  | -2.022118 |
|   |           |           |           |   | *****     |           |           |

|              |          |           |           |              |          |           |           |
|--------------|----------|-----------|-----------|--------------|----------|-----------|-----------|
| 12P34-vacuum |          |           |           | 12C34-vacuum |          |           |           |
| C            | 2.775817 | 2.978695  | 1.398924  | C            | 3.081528 | 2.963083  | 1.144164  |
| C            | 2.374669 | 4.240189  | 0.909278  | C            | 2.655546 | 4.227221  | 0.682034  |
| H            | 2.870399 | 5.139854  | 1.255864  | H            | 3.219868 | 5.116790  | 0.937976  |
| C            | 2.173476 | 1.827056  | 0.946626  | C            | 2.388679 | 1.823262  | 0.805660  |
| H            | 2.481385 | 0.878326  | 1.360621  | H            | 2.711917 | 0.874728  | 1.208043  |
| C            | 1.326263 | 4.320721  | 0.025810  | C            | 1.501112 | 4.325255  | -0.055178 |
| H            | 0.972455 | 5.286654  | -0.319411 | H            | 1.134137 | 5.295880  | -0.372606 |
| C            | 4.488732 | -1.376276 | -0.122797 | C            | 4.252331 | -1.905865 | -0.118063 |
| C            | 3.296456 | -0.719787 | -0.324979 | C            | 3.171400 | -1.067619 | -0.268022 |
| C            | 4.504430 | -2.722330 | 0.302447  | C            | 4.065961 | -3.272443 | 0.183918  |
| H            | 5.448925 | -3.224202 | 0.479525  | H            | 4.924782 | -3.919949 | 0.319796  |

|   |           |           |           |   |           |           |           |
|---|-----------|-----------|-----------|---|-----------|-----------|-----------|
| C | 3.319427  | -3.401791 | 0.446040  | C | 2.793063  | -3.781904 | 0.260406  |
| H | 3.318658  | -4.452012 | 0.718823  | H | 2.636153  | -4.840549 | 0.439857  |
| C | 2.073777  | -2.767965 | 0.197138  | C | 1.655151  | -2.954378 | 0.067171  |
| C | 2.047905  | -1.367589 | -0.121793 | C | 1.838892  | -1.541151 | -0.128728 |
| C | 0.871632  | -3.523720 | 0.174891  | C | 0.355895  | -3.522302 | -0.004467 |
| H | 0.911543  | -4.578011 | 0.427281  | H | 0.244793  | -4.589692 | 0.153945  |
| C | -0.300567 | -2.951183 | -0.250163 | C | -0.731240 | -2.748625 | -0.334116 |
| H | -1.193049 | -3.555081 | -0.373284 | H | -1.712397 | -3.193826 | -0.457704 |
| C | -0.346559 | -1.567716 | -0.516582 | C | -0.561764 | -1.364094 | -0.493630 |
| C | 0.769157  | -0.740830 | -0.332599 | C | 0.664103  | -0.732396 | -0.285913 |
| C | -0.797279 | 0.876992  | -1.132946 | C | -0.846673 | 0.936352  | -0.876642 |
| H | 3.558315  | 2.915286  | 2.146874  | H | 3.954402  | 2.889934  | 1.783369  |
| C | -3.076491 | -0.556629 | -0.147438 | C | -2.923444 | -0.380751 | -0.198713 |
| C | -3.946627 | -0.131005 | 2.073544  | C | -4.155360 | -0.165725 | 1.879675  |
| C | -4.377448 | -0.818710 | -0.589993 | C | -4.129947 | -0.612754 | -0.863217 |
| C | -5.242701 | -0.391147 | 1.622463  | C | -5.356098 | -0.398145 | 1.205971  |
| C | -5.457356 | -0.734356 | 0.290908  | C | -5.340441 | -0.621720 | -0.167460 |
| H | -4.546259 | -1.091023 | -1.626485 | H | -4.125262 | -0.789168 | -1.934353 |
| H | -6.461060 | -0.939175 | -0.064727 | H | -6.266873 | -0.804134 | -0.700792 |
| P | -1.697590 | -0.697664 | -1.383145 | C | 0.444391  | 0.733474  | -0.391385 |
| C | 0.438009  | 0.696728  | -0.505205 | C | 1.227884  | 1.874573  | -0.012209 |
| C | 1.128930  | 1.862556  | -0.016969 | C | 0.738151  | 3.174166  | -0.386323 |
| C | 0.651959  | 3.155350  | -0.424024 | C | -0.529473 | 3.306979  | -1.012432 |
| C | -0.528879 | 3.264764  | -1.205158 | C | -1.335515 | 2.210997  | -1.205156 |
| C | -1.268240 | 2.150557  | -1.510107 | H | -0.874662 | 4.299154  | -1.282954 |
| H | -0.866554 | 4.250623  | -1.506721 | H | -2.337811 | 2.323070  | -1.604085 |
| H | -2.209854 | 2.244652  | -2.040055 | C | -2.951094 | -0.157011 | 1.183645  |
| C | -2.870675 | -0.211988 | 1.195459  | H | -6.293957 | -0.404719 | 1.749850  |
| H | -6.079289 | -0.326577 | 2.309305  | H | -4.159146 | 0.009088  | 2.949918  |
| H | -3.776523 | 0.135813  | 3.110865  | H | -2.022680 | 0.024288  | 1.714611  |
| H | -1.867679 | -0.007472 | 1.552882  | H | 5.255637  | -1.515353 | -0.247334 |
| H | 5.423658  | -0.857519 | -0.303051 | H | 3.341453  | -0.036821 | -0.541379 |
| H | 3.311875  | 0.301313  | -0.677791 | C | -1.606500 | -0.371909 | -0.961496 |
|   | *****     |           |           | H | -1.829590 | -0.598137 | -2.013110 |
|   |           |           |           |   | *****     |           |           |

|            |           |           |           |            |           |           |           |
|------------|-----------|-----------|-----------|------------|-----------|-----------|-----------|
| 12P34-CCI4 |           |           |           | 12C34-CCI4 |           |           |           |
| C          | 2.775550  | 2.981670  | 1.399691  | C          | 3.075477  | 2.970028  | 1.145570  |
| C          | 2.373325  | 4.243038  | 0.909357  | C          | 2.647258  | 4.233444  | 0.682355  |
| H          | 2.868612  | 5.143074  | 1.255513  | H          | 3.209697  | 5.124168  | 0.938333  |
| C          | 2.173792  | 1.829224  | 0.947870  | C          | 2.385072  | 1.828408  | 0.806820  |
| H          | 2.482836  | 0.881117  | 1.362488  | H          | 2.710869  | 0.881044  | 1.209842  |
| C          | 1.324392  | 4.322609  | 0.025861  | C          | 1.492913  | 4.328852  | -0.056104 |
| H          | 0.969645  | 5.288001  | -0.319736 | H          | 1.124232  | 5.298486  | -0.374484 |
| C          | 4.491790  | -1.373176 | -0.125544 | C          | 4.255950  | -1.900728 | -0.114375 |
| C          | 3.298538  | -0.717220 | -0.325500 | C          | 3.173668  | -1.063712 | -0.264451 |
| C          | 4.508959  | -2.720115 | 0.298249  | C          | 4.071106  | -3.268535 | 0.184728  |
| H          | 5.454103  | -3.221305 | 0.473588  | H          | 4.930739  | -3.914916 | 0.320669  |
| C          | 3.324395  | -3.400888 | 0.442647  | C          | 2.798487  | -3.780188 | 0.258545  |
| H          | 3.324509  | -4.451367 | 0.714171  | H          | 2.642855  | -4.839342 | 0.435864  |
| C          | 2.077772  | -2.767206 | 0.195894  | C          | 1.659489  | -2.953487 | 0.065117  |
| C          | 2.050467  | -1.366320 | -0.121855 | C          | 1.841308  | -1.539319 | -0.128309 |
| C          | 0.876191  | -3.524484 | 0.174867  | C          | 0.361048  | -3.523838 | -0.009382 |
| H          | 0.917383  | -4.578855 | 0.426435  | H          | 0.251365  | -4.591705 | 0.146435  |
| C          | -0.297403 | -2.952302 | -0.247985 | C          | -0.726944 | -2.750872 | -0.339002 |

|       |           |           |           |       |           |           |           |
|-------|-----------|-----------|-----------|-------|-----------|-----------|-----------|
| H     | -1.189420 | -3.556969 | -0.370249 | H     | -1.706694 | -3.198145 | -0.466016 |
| C     | -0.344467 | -1.568408 | -0.513466 | C     | -0.559665 | -1.365461 | -0.495721 |
| C     | 0.770798  | -0.740374 | -0.330675 | C     | 0.665181  | -0.731958 | -0.285932 |
| C     | -0.797345 | 0.876622  | -1.130640 | C     | -0.848100 | 0.934360  | -0.877614 |
| H     | 3.558402  | 2.919294  | 2.147312  | H     | 3.948220  | 2.898878  | 1.785130  |
| C     | -3.078666 | -0.559605 | -0.147323 | C     | -2.922219 | -0.385110 | -0.197633 |
| C     | -3.952717 | -0.144463 | 2.074563  | C     | -4.152188 | -0.176378 | 1.883347  |
| C     | -4.379973 | -0.811075 | -0.595950 | C     | -4.129715 | -0.612308 | -0.862584 |
| C     | -5.249232 | -0.393787 | 1.617667  | C     | -5.354149 | -0.403692 | 1.209319  |
| C     | -5.462079 | -0.726281 | 0.282637  | C     | -5.339832 | -0.621733 | -0.165544 |
| H     | -4.548410 | -1.075330 | -1.634515 | H     | -4.126165 | -0.784469 | -1.934272 |
| H     | -6.465817 | -0.922562 | -0.077496 | H     | -6.266990 | -0.800214 | -0.698924 |
| P     | -1.696662 | -0.699016 | -1.378668 | C     | 0.443144  | 0.733826  | -0.391248 |
| C     | 0.438421  | 0.697059  | -0.503321 | C     | 1.224439  | 1.876769  | -0.011869 |
| C     | 1.128700  | 1.863573  | -0.015483 | C     | 0.732462  | 3.175552  | -0.387032 |
| C     | 0.650795  | 3.156045  | -0.423191 | C     | -0.534943 | 3.306085  | -1.014869 |
| C     | -0.530687 | 3.264901  | -1.204013 | C     | -1.338732 | 2.208176  | -1.208004 |
| C     | -1.269830 | 2.149875  | -1.508039 | H     | -0.881568 | 4.297361  | -1.286653 |
| H     | -0.869025 | 4.250416  | -1.505737 | H     | -2.340014 | 2.318441  | -1.609882 |
| H     | -2.211771 | 2.243683  | -2.037389 | C     | -2.948179 | -0.167029 | 1.185908  |
| C     | -2.874434 | -0.225553 | 1.198715  | H     | -6.291643 | -0.410737 | 1.753829  |
| H     | -6.087406 | -0.329243 | 2.302487  | H     | -4.154647 | -0.006102 | 2.954316  |
| H     | -3.783935 | 0.113780  | 3.114204  | H     | -2.019468 | 0.010322  | 1.717827  |
| H     | -1.871634 | -0.029477 | 1.561501  | H     | 5.258859  | -1.508345 | -0.240746 |
| H     | 5.426173  | -0.853528 | -0.305841 | H     | 3.343488  | -0.032119 | -0.534791 |
| H     | 3.313366  | 0.304358  | -0.676932 | C     | -1.606075 | -0.374812 | -0.962515 |
| ***** |           |           |           | H     | -1.830688 | -0.600643 | -2.013615 |
| ***** |           |           |           | ***** |           |           |           |

| 12P34-DCM |           |           |           | 12C34-DCM |           |           |           |
|-----------|-----------|-----------|-----------|-----------|-----------|-----------|-----------|
| C         | 2.766973  | 2.990570  | 1.401171  | C         | 3.062885  | 2.980849  | 1.149161  |
| C         | 2.359876  | 4.251025  | 0.911328  | C         | 2.631689  | 4.242871  | 0.683726  |
| H         | 2.852106  | 5.152546  | 1.257787  | H         | 3.190823  | 5.135444  | 0.940281  |
| C         | 2.169196  | 1.835855  | 0.948989  | C         | 2.376642  | 1.836484  | 0.809729  |
| H         | 2.482384  | 0.889076  | 1.363495  | H         | 2.705718  | 0.890944  | 1.214255  |
| C         | 1.310134  | 4.327352  | 0.027913  | C         | 1.478495  | 4.334089  | -0.057855 |
| H         | 0.951569  | 5.291428  | -0.317169 | H         | 1.107393  | 5.302106  | -0.378133 |
| C         | 4.497865  | -1.360604 | -0.127410 | C         | 4.260496  | -1.891789 | -0.103727 |
| C         | 3.302303  | -0.707803 | -0.325978 | C         | 3.176397  | -1.056903 | -0.255810 |
| C         | 4.519262  | -2.708480 | 0.294534  | C         | 4.077887  | -3.261566 | 0.189422  |
| H         | 5.466026  | -3.206747 | 0.469088  | H         | 4.938642  | -3.906019 | 0.326966  |
| C         | 3.336602  | -3.393394 | 0.438529  | C         | 2.805912  | -3.776965 | 0.255767  |
| H         | 3.339883  | -4.444126 | 0.708732  | H         | 2.652130  | -4.837063 | 0.428585  |
| C         | 2.087771  | -2.762625 | 0.192946  | C         | 1.665479  | -2.951917 | 0.060424  |
| C         | 2.055986  | -1.361082 | -0.123114 | C         | 1.844236  | -1.536198 | -0.127688 |
| C         | 0.888559  | -3.524310 | 0.171785  | C         | 0.368802  | -3.526280 | -0.021415 |
| H         | 0.933331  | -4.578754 | 0.421987  | H         | 0.261755  | -4.595151 | 0.128778  |
| C         | -0.287437 | -2.955088 | -0.249539 | C         | -0.720250 | -2.754742 | -0.351988 |
| H         | -1.177290 | -3.562837 | -0.371919 | H         | -1.697471 | -3.205191 | -0.486763 |
| C         | -0.338814 | -1.570626 | -0.513182 | C         | -0.556571 | -1.367884 | -0.502562 |
| C         | 0.773969  | -0.738858 | -0.330545 | C         | 0.666131  | -0.731354 | -0.287550 |
| C         | -0.799710 | 0.873938  | -1.129432 | C         | -0.850445 | 0.931142  | -0.882462 |
| H         | 3.550551  | 2.930940  | 2.148164  | H         | 3.934792  | 2.912947  | 1.790103  |
| C         | -3.078470 | -0.569513 | -0.146875 | C         | -2.918970 | -0.391723 | -0.196306 |
| C         | -3.952143 | -0.179534 | 2.080333  | C         | -4.140656 | -0.190432 | 1.891388  |

|   |           |           |           |   |           |           |           |
|---|-----------|-----------|-----------|---|-----------|-----------|-----------|
| C | -4.381925 | -0.796942 | -0.602806 | C | -4.129474 | -0.614158 | -0.857970 |
| C | -5.250994 | -0.404269 | 1.616271  | C | -5.345843 | -0.412964 | 1.220707  |
| C | -5.465007 | -0.711948 | 0.275026  | C | -5.336965 | -0.624853 | -0.155715 |
| H | -4.552485 | -1.042328 | -1.645540 | H | -4.130500 | -0.781300 | -1.930244 |
| H | -6.470236 | -0.889187 | -0.090502 | H | -6.266382 | -0.799582 | -0.686325 |
| P | -1.694674 | -0.704614 | -1.375729 | C | 0.440277  | 0.734319  | -0.392455 |
| C | 0.436862  | 0.697901  | -0.502309 | C | 1.217503  | 1.880150  | -0.011820 |
| C | 1.123354  | 1.866706  | -0.013983 | C | 0.722616  | 3.177506  | -0.389666 |
| C | 0.640716  | 3.157914  | -0.421266 | C | -0.543218 | 3.304206  | -1.022390 |
| C | -0.541503 | 3.263581  | -1.202061 | C | -1.343280 | 2.203465  | -1.216927 |
| C | -1.277054 | 2.145835  | -1.506577 | H | -0.890991 | 4.294014  | -1.297766 |
| H | -0.882985 | 4.248017  | -1.503430 | H | -2.342209 | 2.310435  | -1.625411 |
| H | -2.219240 | 2.237004  | -2.035894 | C | -2.939096 | -0.179839 | 1.188643  |
| C | -2.872722 | -0.260228 | 1.205155  | H | -6.281231 | -0.421213 | 1.768780  |
| H | -6.089840 | -0.340301 | 2.300188  | H | -4.138562 | -0.025254 | 2.963151  |
| H | -3.782426 | 0.058871  | 3.124478  | H | -2.008463 | -0.006600 | 1.718812  |
| H | -1.868564 | -0.083525 | 1.574277  | H | 5.262907  | -1.496080 | -0.222907 |
| H | 5.430674  | -0.837759 | -0.306248 | H | 3.345979  | -0.023842 | -0.520350 |
| H | 3.314762  | 0.314637  | -0.674963 | C | -1.605647 | -0.379452 | -0.967136 |
|   | *****     |           |           | H | -1.834532 | -0.604967 | -2.016986 |
|   |           |           |           |   | *****     |           |           |

| 12P34-DMSO |           |           |           | 12C34-DMSO |           |           |           |
|------------|-----------|-----------|-----------|------------|-----------|-----------|-----------|
| C          | 2.760279  | 2.996121  | 1.402324  | C          | 3.054904  | 2.987048  | 1.151366  |
| C          | 2.349947  | 4.255930  | 0.913088  | C          | 2.621959  | 4.248180  | 0.684711  |
| H          | 2.839991  | 5.158428  | 1.259998  | H          | 3.179100  | 5.141853  | 0.941649  |
| C          | 2.165340  | 1.840023  | 0.949601  | C          | 2.371200  | 1.841124  | 0.811477  |
| H          | 2.481189  | 0.893994  | 1.363769  | H          | 2.702098  | 0.896580  | 1.216787  |
| C          | 1.299907  | 4.330180  | 0.029626  | C          | 1.469581  | 4.336929  | -0.058734 |
| H          | 0.938869  | 5.293469  | -0.314944 | H          | 1.097056  | 5.303988  | -0.380128 |
| C          | 4.501320  | -1.351822 | -0.127708 | C          | 4.263047  | -1.885942 | -0.097481 |
| C          | 3.304323  | -0.701322 | -0.326024 | C          | 3.177869  | -1.052476 | -0.250906 |
| C          | 4.525488  | -2.700132 | 0.293166  | C          | 4.081950  | -3.256757 | 0.192354  |
| H          | 5.473276  | -3.196369 | 0.467758  | H          | 4.943426  | -3.899968 | 0.330946  |
| C          | 3.344184  | -3.387823 | 0.436404  | C          | 2.810520  | -3.774464 | 0.254297  |
| H          | 3.349637  | -4.438680 | 0.705947  | H          | 2.657944  | -4.835113 | 0.424567  |
| C          | 2.093992  | -2.759319 | 0.190959  | C          | 1.669185  | -2.950661 | 0.057710  |
| C          | 2.059222  | -1.357449 | -0.124087 | C          | 1.845974  | -1.534110 | -0.127420 |
| C          | 0.896443  | -3.523856 | 0.169097  | C          | 0.373688  | -3.527451 | -0.028403 |
| H          | 0.943529  | -4.578359 | 0.418408  | H          | 0.268409  | -4.596905 | 0.118636  |
| C          | -0.280916 | -2.956789 | -0.251758 | C          | -0.716079 | -2.757043 | -0.359664 |
| H          | -1.169239 | -3.566644 | -0.374650 | H          | -1.691815 | -3.209333 | -0.498854 |
| C          | -0.335289 | -1.572037 | -0.514178 | C          | -0.554646 | -1.369411 | -0.506797 |
| C          | 0.775736  | -0.737829 | -0.331136 | C          | 0.666660  | -0.730962 | -0.288728 |
| C          | -0.801525 | 0.872048  | -1.129409 | C          | -0.851930 | 0.929160  | -0.885641 |
| H          | 3.544210  | 2.938152  | 2.149027  | H          | 3.926267  | 2.921043  | 1.793185  |
| C          | -3.077414 | -0.576027 | -0.146510 | C          | -2.916863 | -0.395806 | -0.195759 |
| C          | -3.949408 | -0.202419 | 2.084439  | C          | -4.133075 | -0.198841 | 1.896062  |
| C          | -4.382366 | -0.788172 | -0.605788 | C          | -4.129294 | -0.615534 | -0.854999 |
| C          | -5.249825 | -0.411487 | 1.617065  | C          | -5.340262 | -0.418745 | 1.227801  |
| C          | -5.465359 | -0.703239 | 0.272324  | C          | -5.334983 | -0.627077 | -0.149392 |
| H          | -4.554617 | -1.021394 | -1.650978 | H          | -4.133339 | -0.779755 | -1.927612 |
| H          | -6.471692 | -0.868404 | -0.095680 | H          | -6.265854 | -0.799747 | -0.678078 |
| P          | -1.693517 | -0.708383 | -1.375259 | C          | 0.438410  | 0.734581  | -0.393398 |
| C          | 0.435443  | 0.698426  | -0.502201 | C          | 1.213090  | 1.882083  | -0.011862 |

|   |           |           |           |   |           |           |           |
|---|-----------|-----------|-----------|---|-----------|-----------|-----------|
| C | 1.119219  | 1.868698  | -0.013267 | C | 0.716468  | 3.178538  | -0.391240 |
| C | 0.633443  | 3.159057  | -0.420092 | C | -0.548377 | 3.302904  | -1.026790 |
| C | -0.548977 | 3.262499  | -1.201149 | C | -1.346193 | 2.200552  | -1.222245 |
| C | -1.281927 | 2.143021  | -1.506353 | H | -0.896781 | 4.291889  | -1.304207 |
| H | -0.892494 | 4.246233  | -1.502360 | H | -2.343840 | 2.305453  | -1.634354 |
| H | -2.224117 | 2.232230  | -2.035980 | C | -2.933224 | -0.187484 | 1.189943  |
| C | -2.869973 | -0.282716 | 1.208944  | H | -6.274231 | -0.427792 | 1.778253  |
| H | -6.088596 | -0.348006 | 2.301052  | H | -4.128054 | -0.036602 | 2.968266  |
| H | -3.778477 | 0.023242  | 3.131189  | H | -2.001217 | -0.016653 | 1.718623  |
| H | -1.864733 | -0.118409 | 1.580948  | H | 5.265092  | -1.488200 | -0.212573 |
| H | 5.433080  | -0.826758 | -0.305317 | H | 3.347029  | -0.018590 | -0.512320 |
| H | 3.315092  | 0.321627  | -0.673562 | C | -1.605348 | -0.382373 | -0.970179 |
|   | *****     |           |           | H | -1.836687 | -0.607913 | -2.019287 |
|   | *****     |           |           |   | *****     |           |           |

| 12P34-n-hexane |           |           |           | 12C34-n-hexane |           |           |           |
|----------------|-----------|-----------|-----------|----------------|-----------|-----------|-----------|
| C              | 2.776691  | 2.980319  | 1.399492  | C              | 3.076845  | 2.968636  | 1.145189  |
| C              | 2.375181  | 4.241824  | 0.909145  | C              | 2.649022  | 4.232204  | 0.682247  |
| H              | 2.870886  | 5.141631  | 1.255323  | H              | 3.211853  | 5.122701  | 0.938186  |
| C              | 2.174386  | 1.828224  | 0.947665  | C              | 2.385946  | 1.827372  | 0.806505  |
| H              | 2.482827  | 0.879910  | 1.362263  | H              | 2.711275  | 0.879766  | 1.209348  |
| C              | 1.326416  | 4.321895  | 0.025608  | C              | 1.494596  | 4.328136  | -0.055870 |
| H              | 0.972235  | 5.287491  | -0.320035 | H              | 1.126226  | 5.297972  | -0.374020 |
| C              | 4.490776  | -1.375139 | -0.124947 | C              | 4.255315  | -1.901720 | -0.115520 |
| C              | 3.297923  | -0.718683 | -0.325266 | C              | 3.173270  | -1.064473 | -0.265441 |
| C              | 4.507229  | -2.721934 | 0.299083  | C              | 4.070216  | -3.269262 | 0.184302  |
| H              | 5.452093  | -3.223574 | 0.474691  | H              | 4.929713  | -3.915860 | 0.320121  |
| C              | 3.322360  | -3.402057 | 0.443347  | C              | 2.797551  | -3.780476 | 0.258924  |
| H              | 3.321945  | -4.452496 | 0.715078  | H              | 2.641701  | -4.839516 | 0.436781  |
| C              | 2.076120  | -2.767917 | 0.196258  | C              | 1.658734  | -2.953627 | 0.065654  |
| C              | 2.049551  | -1.367125 | -0.121697 | C              | 1.840907  | -1.539664 | -0.128401 |
| C              | 0.874186  | -3.524509 | 0.175061  | C              | 0.360113  | -3.523494 | -0.008031 |
| H              | 0.914801  | -4.578882 | 0.426770  | H              | 0.250149  | -4.591244 | 0.148457  |
| C              | -0.298993 | -2.951850 | -0.248100 | C              | -0.727750 | -2.750407 | -0.337587 |
| H              | -1.191317 | -3.556053 | -0.370491 | H              | -1.707808 | -3.197272 | -0.463693 |
| C              | -0.345374 | -1.568033 | -0.513753 | C              | -0.560045 | -1.365187 | -0.495030 |
| C              | 0.770264  | -0.740593 | -0.330826 | C              | 0.665027  | -0.732032 | -0.285822 |
| C              | -0.796990 | 0.877056  | -1.130999 | C              | -0.847824 | 0.934745  | -0.877189 |
| H              | 3.559423  | 2.917514  | 2.147212  | H              | 3.949658  | 2.897082  | 1.784623  |
| C              | -3.078550 | -0.558035 | -0.147383 | C              | -2.922547 | -0.384294 | -0.197848 |
| C              | -3.952342 | -0.139051 | 2.073786  | C              | -4.153259 | -0.174513 | 1.882417  |
| C              | -4.379540 | -0.813331 | -0.594595 | C              | -4.129746 | -0.612227 | -0.862977 |
| C              | -5.248510 | -0.392313 | 1.618278  | C              | -5.354881 | -0.402595 | 1.208192  |
| C              | -5.461338 | -0.728678 | 0.284302  | C              | -5.340073 | -0.621530 | -0.166424 |
| H              | -4.547777 | -1.080484 | -1.632465 | H              | -4.125781 | -0.785093 | -1.934581 |
| H              | -6.464867 | -0.928001 | -0.074784 | H              | -6.267012 | -0.800610 | -0.699993 |
| P              | -1.697018 | -0.698099 | -1.379362 | C              | 0.443441  | 0.733754  | -0.391188 |
| C              | 0.438621  | 0.696951  | -0.503593 | C              | 1.225199  | 1.876330  | -0.011906 |
| C              | 1.129443  | 1.863112  | -0.015771 | C              | 0.733611  | 3.175276  | -0.386769 |
| C              | 0.652249  | 3.155777  | -0.423516 | C              | -0.533927 | 3.306265  | -1.014082 |
| C              | -0.529058 | 3.265120  | -1.204421 | C              | -1.338171 | 2.208730  | -1.207083 |
| C              | -1.268703 | 2.150509  | -1.508468 | H              | -0.880353 | 4.297729  | -1.285476 |
| H              | -0.866882 | 4.250803  | -1.506224 | H              | -2.339734 | 2.319371  | -1.608174 |
| H              | -2.210558 | 2.244689  | -2.037915 | C              | -2.949065 | -0.165305 | 1.185487  |
| C              | -2.874390 | -0.220113 | 1.197643  | H              | -6.292552 | -0.409521 | 1.752400  |

|   |           |           |           |   |           |           |           |
|---|-----------|-----------|-----------|---|-----------|-----------|-----------|
| H | -6.086465 | -0.327771 | 2.303384  | H | -4.156157 | -0.003498 | 2.953268  |
| H | -3.783574 | 0.122282  | 3.112669  | H | -2.020500 | 0.012657  | 1.717423  |
| H | -1.871776 | -0.020949 | 1.559232  | H | 5.258281  | -1.509726 | -0.242712 |
| H | 5.425431  | -0.855976 | -0.305277 | H | 3.343075  | -0.033060 | -0.536510 |
| H | 3.313188  | 0.302787  | -0.677000 | C | -1.606132 | -0.374260 | -0.962100 |
|   | *****     |           |           | H | -1.830275 | -0.600177 | -2.013340 |
|   |           |           |           |   | *****     |           |           |

| 1-A-13-D-P1234-vacuum |           |           |           | 1-A-13-D-P1234-CCl4 |           |           |           |
|-----------------------|-----------|-----------|-----------|---------------------|-----------|-----------|-----------|
| C                     | 2.588991  | -3.620543 | 0.317555  | C                   | 2.605104  | -3.622563 | 0.314820  |
| C                     | 2.063116  | -2.756316 | 1.288890  | C                   | 2.064841  | -2.762899 | 1.282881  |
| C                     | 3.123791  | -3.104668 | -0.839316 | H                   | 1.762547  | -3.180102 | 2.233797  |
| H                     | 3.622268  | -3.746251 | -1.557128 | C                   | 3.147983  | -3.101650 | -0.836719 |
| C                     | 1.972223  | -1.384151 | 1.074956  | H                   | 3.658991  | -3.738562 | -1.549904 |
| C                     | 3.049393  | -1.719033 | -1.096987 | C                   | 1.970405  | -1.389662 | 1.072225  |
| C                     | 2.339560  | -0.856191 | -0.209565 | C                   | 3.066540  | -1.715349 | -1.093013 |
| C                     | 3.753119  | -1.164550 | -2.214961 | C                   | 2.344721  | -0.857129 | -0.209638 |
| H                     | 4.294651  | -1.840603 | -2.867583 | C                   | 3.775591  | -1.156554 | -2.205945 |
| C                     | 3.822578  | 0.178791  | -2.396022 | H                   | 4.325438  | -1.829145 | -2.855144 |
| H                     | 4.446365  | 0.605298  | -3.174230 | C                   | 3.838885  | 0.187602  | -2.385428 |
| C                     | 3.028372  | 1.063065  | -1.599038 | H                   | 4.465785  | 0.618351  | -3.158715 |
| C                     | 2.130574  | 0.525299  | -0.630707 | C                   | 3.035993  | 1.067110  | -1.591555 |
| C                     | 3.114171  | 2.464386  | -1.779132 | C                   | 2.134321  | 0.525157  | -0.629296 |
| H                     | 3.831421  | 2.854673  | -2.493275 | C                   | 3.120725  | 2.469438  | -1.768404 |
| C                     | 2.341426  | 3.314507  | -1.029566 | H                   | 3.840024  | 2.861996  | -2.479092 |
| H                     | 2.472647  | 4.388919  | -1.098271 | C                   | 2.345679  | 3.317117  | -1.018433 |
| C                     | 1.305273  | 2.798976  | -0.217163 | H                   | 2.477181  | 4.391602  | -1.083356 |
| C                     | 1.103370  | 1.398941  | -0.139795 | C                   | 1.307921  | 2.798408  | -0.209352 |
| C                     | 0.475652  | 3.706194  | 0.551140  | C                   | 1.105501  | 1.397830  | -0.138255 |
| H                     | 0.752990  | 4.755339  | 0.550255  | C                   | 0.478515  | 3.703670  | 0.561887  |
| C                     | -0.575702 | 3.277089  | 1.284084  | H                   | 0.755633  | 4.752702  | 0.564497  |
| H                     | -1.154436 | 3.959731  | 1.895841  | C                   | -0.572373 | 3.271357  | 1.294012  |
| C                     | -1.011714 | 1.910134  | 1.150608  | H                   | -1.150762 | 3.950833  | 1.909421  |
| C                     | -0.203812 | 0.969456  | 0.348890  | C                   | -1.008322 | 1.905050  | 1.153686  |
| C                     | -2.216157 | 1.409208  | 1.561294  | C                   | -0.202404 | 0.968389  | 0.346304  |
| H                     | 2.630193  | -4.685556 | 0.516242  | C                   | -2.213197 | 1.402718  | 1.562418  |
| C                     | -0.909322 | -0.181709 | 0.040355  | H                   | -2.939144 | 1.947982  | 2.150911  |
| P                     | -2.395404 | -0.305035 | 1.080902  | H                   | 2.652132  | -4.687436 | 0.513285  |
| C                     | -3.864054 | -0.375559 | -0.033597 | C                   | -0.911707 | -0.179557 | 0.030306  |
| C                     | -4.020399 | 0.492182  | -1.122935 | P                   | -2.396598 | -0.307608 | 1.072526  |
| C                     | -4.846458 | -1.335850 | 0.227396  | C                   | -3.869270 | -0.375980 | -0.035941 |
| C                     | -5.146253 | 0.397772  | -1.933992 | C                   | -4.033989 | 0.498778  | -1.118865 |
| H                     | -3.258708 | 1.233024  | -1.336835 | C                   | -4.846733 | -1.342084 | 0.224253  |
| C                     | -5.976962 | -1.424910 | -0.585771 | C                   | -5.163520 | 0.404796  | -1.925496 |
| H                     | -4.726117 | -2.016954 | 1.062503  | H                   | -3.277439 | 1.245127  | -1.331957 |
| C                     | -6.126848 | -0.559472 | -1.665357 | C                   | -5.980775 | -1.430389 | -0.584519 |
| H                     | -5.258832 | 1.068589  | -2.778379 | H                   | -4.721019 | -2.027734 | 1.054755  |
| H                     | -6.732795 | -2.173640 | -0.377431 | C                   | -6.139065 | -0.558495 | -1.658235 |
| H                     | -7.002156 | -0.631075 | -2.301173 | H                   | -5.283056 | 1.080939  | -2.764576 |
| H                     | 1.766731  | -3.169560 | 2.243466  | H                   | -6.732750 | -2.183136 | -0.377072 |
| N                     | 1.570598  | -0.511037 | 2.117119  | H                   | -7.017084 | -0.629512 | -2.290262 |
| C                     | 0.838060  | -1.091097 | 3.232737  | N                   | 1.559292  | -0.522405 | 2.113726  |
| H                     | 0.411719  | -0.279606 | 3.827577  | C                   | 2.579140  | 0.420550  | 2.584772  |
| H                     | 0.018571  | -1.710524 | 2.867130  | H                   | 2.098592  | 1.219711  | 3.154755  |
| H                     | 1.469785  | -1.698743 | 3.903299  | H                   | 3.316426  | -0.075884 | 3.236431  |

|       |           |           |           |       |           |           |           |
|-------|-----------|-----------|-----------|-------|-----------|-----------|-----------|
| C     | 2.600141  | 0.422315  | 2.583476  | H     | 3.109765  | 0.870207  | 1.748713  |
| H     | 2.129092  | 1.226721  | 3.154442  | C     | 0.830396  | -1.110784 | 3.228556  |
| H     | 3.336873  | -0.079335 | 3.232358  | H     | 0.398150  | -0.303511 | 3.824503  |
| H     | 3.130460  | 0.866708  | 1.744271  | H     | 0.016217  | -1.736381 | 2.861796  |
| H     | -2.943634 | 1.957946  | 2.144585  | H     | 1.467118  | -1.714259 | 3.897329  |
| C     | -0.599056 | -1.190034 | -0.891160 | C     | -0.610618 | -1.174539 | -0.916006 |
| N     | -0.459808 | -2.016816 | -1.692703 | N     | -0.484362 | -1.989262 | -1.732887 |
| ***** |           |           |           | ***** |           |           |           |

| 1-A-13-D-P1234-DCM |           |           |           | 1-A-13-D-P1234-DMSO |           |           |           |
|--------------------|-----------|-----------|-----------|---------------------|-----------|-----------|-----------|
| C                  | 2.609259  | -3.624965 | 0.310503  | C                   | 2.616775  | -3.623499 | 0.309699  |
| C                  | 2.060265  | -2.768387 | 1.276974  | C                   | 2.063576  | -2.768431 | 1.275387  |
| H                  | 1.753630  | -3.188851 | 2.224958  | H                   | 1.757484  | -3.189987 | 2.223018  |
| C                  | 3.159510  | -3.100800 | -0.836947 | C                   | 3.167408  | -3.097973 | -0.837363 |
| H                  | 3.680588  | -3.734600 | -1.545712 | H                   | 3.693368  | -3.730083 | -1.544094 |
| C                  | 1.967513  | -1.393400 | 1.070565  | C                   | 1.968922  | -1.393021 | 1.069805  |
| C                  | 3.075828  | -1.713391 | -1.091144 | C                   | 3.079816  | -1.710484 | -1.091821 |
| C                  | 2.346965  | -0.857748 | -0.209959 | C                   | 2.348045  | -0.856419 | -0.211070 |
| C                  | 3.789355  | -1.151987 | -2.200500 | C                   | 3.792665  | -1.147640 | -2.201165 |
| H                  | 4.346136  | -1.822168 | -2.846268 | H                   | 4.352706  | -1.816335 | -2.845669 |
| C                  | 3.848431  | 0.192927  | -2.379200 | C                   | 3.847821  | 0.197588  | -2.380502 |
| H                  | 4.478464  | 0.626483  | -3.148242 | H                   | 4.477706  | 0.632654  | -3.148751 |
| C                  | 3.039159  | 1.069319  | -1.587938 | C                   | 3.036002  | 1.072041  | -1.589545 |
| C                  | 2.135381  | 0.524895  | -0.629204 | C                   | 2.133581  | 0.525821  | -0.630664 |
| C                  | 3.122856  | 2.472505  | -1.763659 | C                   | 3.117198  | 2.475703  | -1.765228 |
| H                  | 3.843303  | 2.866336  | -2.472301 | H                   | 3.836568  | 2.870873  | -2.474147 |
| C                  | 2.346531  | 3.318786  | -1.013459 | C                   | 2.340690  | 3.320595  | -1.013667 |
| H                  | 2.478183  | 4.393212  | -1.076188 | H                   | 2.471122  | 4.395126  | -1.075883 |
| C                  | 1.308224  | 2.798262  | -0.205359 | C                   | 1.304138  | 2.798308  | -0.204029 |
| C                  | 1.105800  | 1.397240  | -0.137260 | C                   | 1.103435  | 1.396902  | -0.136939 |
| C                  | 0.479279  | 3.703266  | 0.566967  | C                   | 0.475614  | 3.702017  | 0.570351  |
| H                  | 0.756205  | 4.752126  | 0.570290  | H                   | 0.751445  | 4.751062  | 0.574188  |
| C                  | -0.570923 | 3.269262  | 1.299369  | C                   | -0.572768 | 3.265855  | 1.304228  |
| H                  | -1.149025 | 3.946737  | 1.916951  | H                   | -1.150516 | 3.941578  | 1.923908  |
| C                  | -1.006011 | 1.902982  | 1.156067  | C                   | -1.006313 | 1.899200  | 1.159723  |
| C                  | -0.201627 | 0.968185  | 0.346163  | C                   | -0.202501 | 0.966406  | 0.347620  |
| C                  | -2.210644 | 1.399702  | 1.565265  | C                   | -2.209905 | 1.394063  | 1.570047  |
| H                  | -2.934782 | 1.942841  | 2.157934  | H                   | -2.933298 | 1.935301  | 2.165326  |
| H                  | 2.659673  | -4.689754 | 0.508980  | H                   | 2.671369  | -4.687902 | 0.509323  |
| C                  | -0.913404 | -0.179266 | 0.028556  | C                   | -0.914191 | -0.181611 | 0.029548  |
| P                  | -2.397676 | -0.308767 | 1.072675  | P                   | -2.397717 | -0.313460 | 1.075364  |
| C                  | -3.870294 | -0.376267 | -0.035929 | C                   | -3.869673 | -0.378967 | -0.034476 |
| C                  | -4.040339 | 0.507865  | -1.110942 | C                   | -4.045018 | 0.516264  | -1.099657 |
| C                  | -4.842137 | -1.350641 | 0.216396  | C                   | -4.835243 | -1.362612 | 0.206501  |
| C                  | -5.169556 | 0.414175  | -1.918764 | C                   | -5.173090 | 0.424033  | -1.909521 |
| H                  | -3.290314 | 1.262940  | -1.316388 | H                   | -3.301086 | 1.279978  | -1.295173 |
| C                  | -5.975650 | -1.438668 | -0.593855 | C                   | -5.967435 | -1.449404 | -0.606064 |
| H                  | -4.714523 | -2.041331 | 1.042322  | H                   | -4.704894 | -2.060432 | 1.025939  |
| C                  | -6.139157 | -0.558100 | -1.660266 | C                   | -6.136161 | -0.558023 | -1.662865 |
| H                  | -5.294360 | 1.098681  | -2.750170 | H                   | -5.302707 | 1.118051  | -2.732225 |
| H                  | -6.723841 | -2.196596 | -0.392100 | H                   | -6.711190 | -2.213808 | -0.412712 |
| H                  | -7.017285 | -0.627964 | -2.292121 | H                   | -7.013789 | -0.626097 | -2.295540 |
| N                  | 1.552344  | -0.531250 | 2.111828  | N                   | 1.551913  | -0.533037 | 2.110721  |
| C                  | 0.830384  | -1.125555 | 3.229352  | C                   | 2.556911  | 0.429155  | 2.578962  |
| H                  | 0.396582  | -0.321077 | 3.827457  | H                   | 2.062724  | 1.223993  | 3.142527  |

|       |           |           |           |       |           |           |           |
|-------|-----------|-----------|-----------|-------|-----------|-----------|-----------|
| H     | 0.018653  | -1.755782 | 2.865189  | H     | 3.296540  | -0.053828 | 3.236997  |
| H     | 1.473513  | -1.725705 | 3.893932  | H     | 3.085497  | 0.880895  | 1.742998  |
| C     | 2.562874  | 0.423509  | 2.582155  | C     | 0.834319  | -1.129671 | 3.230317  |
| H     | 2.073667  | 1.219186  | 3.149120  | H     | 0.399284  | -0.326377 | 3.828884  |
| H     | 3.301624  | -0.065197 | 3.237271  | H     | 0.024111  | -1.763120 | 2.868320  |
| H     | 3.092191  | 0.875537  | 1.746716  | H     | 1.481169  | -1.727066 | 3.893311  |
| C     | -0.618896 | -1.165426 | -0.925850 | C     | -0.621772 | -1.163468 | -0.928444 |
| N     | -0.500486 | -1.973498 | -1.751877 | N     | -0.505476 | -1.968242 | -1.758723 |
| ***** |           |           |           | ***** |           |           |           |

| 1-A-13-D-P1234-N-HEXANE |           |           |           | 3-A-12-D-P1234-VAC |           |           |           |
|-------------------------|-----------|-----------|-----------|--------------------|-----------|-----------|-----------|
| C                       | 2.602565  | -3.622239 | 0.315611  | C                  | 3.474459  | -2.808431 | -0.493798 |
| C                       | 2.064698  | -2.761736 | 1.284139  | C                  | 2.548379  | -2.409168 | 0.511863  |
| H                       | 1.763402  | -3.178176 | 2.235725  | C                  | 3.977589  | -1.888103 | -1.379411 |
| C                       | 3.143952  | -3.102241 | -0.836907 | H                  | 4.725723  | -2.198861 | -2.101578 |
| H                       | 3.652723  | -3.739990 | -1.550933 | C                  | 2.131764  | -1.073561 | 0.518820  |
| C                       | 1.970701  | -1.388741 | 1.072763  | H                  | 1.452619  | -0.740381 | 1.284748  |
| C                       | 3.063597  | -1.716110 | -1.093574 | C                  | 3.588787  | -0.530405 | -1.351894 |
| C                       | 2.343840  | -0.857050 | -0.209543 | C                  | 2.580506  | -0.129994 | -0.427324 |
| C                       | 3.771731  | -1.158136 | -2.207406 | C                  | 4.274940  | 0.443704  | -2.136915 |
| H                       | 4.320031  | -1.831390 | -2.857231 | H                  | 5.033431  | 0.109108  | -2.837019 |
| C                       | 3.836196  | 0.185863  | -2.387188 | C                  | 4.049369  | 1.768964  | -1.937992 |
| H                       | 4.462539  | 0.615818  | -3.161383 | H                  | 4.636612  | 2.517744  | -2.458064 |
| C                       | 3.034887  | 1.066256  | -1.592770 | C                  | 3.021661  | 2.213649  | -1.045977 |
| C                       | 2.133812  | 0.525106  | -0.629478 | C                  | 2.157434  | 1.272002  | -0.412465 |
| C                       | 3.119937  | 2.468395  | -1.770152 | C                  | 2.872692  | 3.598395  | -0.787403 |
| H                       | 3.838945  | 2.860499  | -2.481413 | H                  | 3.564070  | 4.292204  | -1.253311 |
| C                       | 2.345346  | 3.316567  | -1.020265 | C                  | 1.908484  | 4.047456  | 0.073422  |
| H                       | 2.476892  | 4.391031  | -1.085858 | H                  | 1.843864  | 5.098560  | 0.332887  |
| C                       | 1.307765  | 2.798491  | -0.210689 | C                  | 0.930410  | 3.156275  | 0.575160  |
| C                       | 1.105304  | 1.398020  | -0.138570 | C                  | 0.979531  | 1.782265  | 0.236977  |
| C                       | 0.478355  | 3.704114  | 0.560041  | C                  | -0.119975 | 3.677081  | 1.423569  |
| H                       | 0.755594  | 4.753150  | 0.562157  | H                  | -0.034320 | 4.712573  | 1.736965  |
| C                       | -0.572725 | 3.272408  | 1.292197  | C                  | -1.170897 | 2.930758  | 1.837017  |
| H                       | -1.151160 | 3.952459  | 1.906965  | H                  | -1.933990 | 3.337056  | 2.490058  |
| C                       | -1.008806 | 1.906041  | 1.152936  | C                  | -1.325564 | 1.610163  | 1.304204  |
| C                       | -0.202570 | 0.968661  | 0.346539  | C                  | -0.264856 | 1.029246  | 0.460149  |
| C                       | -2.213702 | 1.404041  | 1.561873  | C                  | -2.456690 | 0.819589  | 1.406921  |
| H                       | -2.939950 | 1.949968  | 2.149369  | H                  | 3.820089  | -3.830973 | -0.548122 |
| H                       | 2.648607  | -4.687126 | 0.514157  | C                  | -0.664163 | -0.135785 | -0.144281 |
| C                       | -0.911269 | -0.179768 | 0.031686  | P                  | -2.179965 | -0.760342 | 0.566861  |
| P                       | -2.396391 | -0.306892 | 1.073469  | C                  | -3.438087 | -0.900154 | -0.772615 |
| C                       | -3.868584 | -0.375814 | -0.035666 | C                  | -3.596285 | 0.087572  | -1.754455 |
| C                       | -4.031903 | 0.497220  | -1.120103 | C                  | -4.255936 | -2.034199 | -0.797792 |
| C                       | -4.847075 | -1.340537 | 0.225405  | C                  | -4.561654 | -0.062627 | -2.744344 |
| C                       | -5.161035 | 0.403048  | -1.927146 | H                  | -2.966634 | 0.969574  | -1.740176 |
| H                       | -3.274268 | 1.242234  | -1.333984 | C                  | -5.224736 | -2.179849 | -1.791282 |
| C                       | -5.980748 | -1.429064 | -0.583755 | H                  | -4.138260 | -2.801308 | -0.040653 |
| H                       | -4.722167 | -2.025104 | 1.056938  | C                  | -5.377115 | -1.195985 | -2.763838 |
| C                       | -6.137643 | -0.558777 | -1.658876 | H                  | -4.680447 | 0.705265  | -3.500522 |
| H                       | -5.279356 | 1.077800  | -2.767532 | H                  | -5.857280 | -3.060147 | -1.801645 |
| H                       | -6.733496 | -2.180867 | -0.375615 | H                  | -6.129700 | -1.308153 | -3.536165 |
| H                       | -7.015351 | -0.630031 | -2.291329 | H                  | -0.065712 | -0.710738 | -0.833964 |
| N                       | 1.561182  | -0.520346 | 2.114352  | N                  | 2.076873  | -3.324506 | 1.443834  |
| C                       | 2.582973  | 0.420543  | 2.584823  | C                  | 1.299345  | -2.845074 | 2.577640  |

|       |           |           |           |       |           |           |          |
|-------|-----------|-----------|-----------|-------|-----------|-----------|----------|
| H     | 2.104260  | 1.220806  | 3.154904  | H     | 0.969025  | -3.699632 | 3.166894 |
| H     | 3.319906  | -0.077073 | 3.236113  | H     | 1.874035  | -2.173635 | 3.232853 |
| H     | 3.113872  | 0.869119  | 1.748324  | H     | 0.405454  | -2.315272 | 2.240831 |
| C     | 0.831277  | -1.107147 | 3.229124  | C     | 2.760228  | -4.600590 | 1.603550 |
| H     | 0.400066  | -0.299067 | 3.824811  | H     | 3.807546  | -4.486947 | 1.919787 |
| H     | 0.016121  | -1.731493 | 2.862344  | H     | 2.237637  | -5.187045 | 2.358108 |
| H     | 1.466836  | -1.711512 | 3.898379  | H     | 2.742708  | -5.177772 | 0.675755 |
| C     | -0.608505 | -1.177125 | -0.912100 | C     | -3.614235 | 1.148289  | 2.135992 |
| N     | -0.480096 | -1.993855 | -1.726443 | N     | -4.579631 | 1.410936  | 2.723084 |
| ***** |           |           |           | ***** |           |           |          |

| 3-A-12-D-P1234-CCI4 |           |           |           | 3-A-12-D-P1234-DCM |           |           |           |
|---------------------|-----------|-----------|-----------|--------------------|-----------|-----------|-----------|
| C                   | 3.471525  | -2.808084 | -0.490339 | C                  | -3.468784 | 2.809617  | -0.488609 |
| C                   | 2.548901  | -2.406145 | 0.518687  | C                  | -2.547831 | 2.406144  | 0.522543  |
| C                   | 3.970942  | -1.890540 | -1.381114 | C                  | -3.966923 | 1.893486  | -1.381794 |
| H                   | 4.716513  | -2.203396 | -2.104997 | H                  | -4.711023 | 2.207827  | -2.106483 |
| C                   | 2.131872  | -1.069548 | 0.522773  | C                  | -2.131629 | 1.068140  | 0.525763  |
| H                   | 1.455455  | -0.734638 | 1.290533  | H                  | -1.455981 | 0.732704  | 1.294141  |
| C                   | 3.581832  | -0.532279 | -1.356196 | C                  | -3.578455 | 0.534381  | -1.357753 |
| C                   | 2.577011  | -0.129278 | -0.428345 | C                  | -2.575559 | 0.129644  | -0.427815 |
| C                   | 4.265595  | 0.439430  | -2.146483 | C                  | -4.261976 | -0.435741 | -2.150539 |
| H                   | 5.021788  | 0.102507  | -2.847939 | H                  | -5.016900 | -0.097094 | -2.852491 |
| C                   | 4.040977  | 1.766033  | -1.951199 | C                  | -4.038653 | -1.763491 | -1.957142 |
| H                   | 4.626975  | 2.513105  | -2.475024 | H                  | -4.624695 | -2.509339 | -2.482532 |
| C                   | 3.015738  | 2.213263  | -1.057295 | C                  | -3.014473 | -2.212491 | -1.062445 |
| C                   | 2.153921  | 1.273055  | -0.417564 | C                  | -2.153161 | -1.273336 | -0.419532 |
| C                   | 2.867454  | 3.599457  | -0.803219 | C                  | -2.867415 | -3.599883 | -0.810957 |
| H                   | 3.556988  | 4.291644  | -1.274072 | H                  | -3.556441 | -4.290788 | -1.284249 |
| C                   | 1.906035  | 4.051601  | 0.059451  | C                  | -1.907424 | -4.054381 | 0.052429  |
| H                   | 1.842050  | 5.103339  | 0.315928  | H                  | -1.844450 | -5.106399 | 0.307429  |
| C                   | 0.929660  | 3.161103  | 0.566816  | C                  | -0.931087 | -3.164544 | 0.562287  |
| C                   | 0.977733  | 1.785809  | 0.233042  | C                  | -0.977890 | -1.788298 | 0.231277  |
| C                   | -0.117917 | 3.683593  | 1.416854  | C                  | 0.115071  | -3.688811 | 1.412367  |
| H                   | -0.031864 | 4.719758  | 1.727599  | H                  | 0.028958  | -4.725501 | 1.720828  |
| C                   | -1.168517 | 2.938079  | 1.835136  | C                  | 1.166089  | -2.944005 | 1.833149  |
| H                   | -1.928129 | 3.348666  | 2.489462  | H                  | 1.923498  | -3.358273 | 2.487647  |
| C                   | -1.325661 | 1.617586  | 1.304315  | C                  | 1.324833  | -1.623749 | 1.303925  |
| C                   | -0.265930 | 1.033960  | 0.462039  | C                  | 0.265728  | -1.037869 | 0.463534  |
| C                   | -2.457664 | 0.825637  | 1.408269  | C                  | 2.457647  | -0.830556 | 1.408275  |
| H                   | 3.817619  | -3.830549 | -0.542235 | H                  | -3.814695 | 3.832132  | -0.539675 |
| C                   | -0.666395 | -0.132870 | -0.138524 | C                  | 0.667116  | 0.130105  | -0.134648 |
| P                   | -2.181801 | -0.756828 | 0.572362  | P                  | 2.182063  | 0.754089  | 0.575593  |
| C                   | -3.438427 | -0.905235 | -0.767180 | C                  | 3.438966  | 0.907049  | -0.763103 |
| C                   | -3.632655 | 0.101426  | -1.723382 | C                  | 3.651913  | -0.107876 | -1.707031 |
| C                   | -4.215728 | -2.066892 | -0.819673 | C                  | 4.195795  | 2.081936  | -0.827989 |
| C                   | -4.594271 | -0.057557 | -2.715938 | C                  | 4.612355  | 0.056196  | -2.700471 |
| H                   | -3.034950 | 1.004835  | -1.688423 | H                  | 3.069989  | -1.021191 | -1.663530 |
| C                   | -5.179639 | -2.221838 | -1.817001 | C                  | 5.157958  | 2.242047  | -1.826728 |
| H                   | -4.070815 | -2.848367 | -0.082301 | H                  | 4.036056  | 2.870253  | -0.101144 |
| C                   | -5.368596 | -1.219055 | -2.763995 | C                  | 5.366073  | 1.231086  | -2.761582 |
| H                   | -4.741415 | 0.724596  | -3.452142 | H                  | 4.773589  | -0.731516 | -3.427640 |
| H                   | -5.779979 | -3.123797 | -1.849807 | H                  | 5.741307  | 3.154540  | -1.870321 |
| H                   | -6.117715 | -1.338282 | -3.538552 | H                  | 6.113335  | 1.354682  | -3.537140 |
| H                   | -0.071072 | -0.708634 | -0.830269 | H                  | 0.074013  | 0.706773  | -0.827548 |
| N                   | 2.082435  | -3.317996 | 1.454019  | N                  | -2.083144 | 3.315949  | 1.458372  |

|       |           |           |          |       |           |           |          |
|-------|-----------|-----------|----------|-------|-----------|-----------|----------|
| C     | 1.315259  | -2.835371 | 2.594657 | C     | -1.325876 | 2.831151  | 2.605807 |
| H     | 0.987096  | -3.688686 | 3.186360 | H     | -1.000192 | 3.683806  | 3.199309 |
| H     | 1.898526  | -2.166363 | 3.244193 | H     | -1.917524 | 2.165153  | 3.250323 |
| H     | 0.421025  | -2.301642 | 2.265281 | H     | -0.431540 | 2.293027  | 2.284073 |
| C     | 2.764497  | -4.596893 | 1.611773 | C     | -2.760482 | 4.599624  | 1.611958 |
| H     | 3.812589  | -4.483262 | 1.923704 | H     | -3.808095 | 4.489863  | 1.925360 |
| H     | 2.243972  | -5.180735 | 2.369330 | H     | -2.236744 | 5.183170  | 2.367131 |
| H     | 2.742072  | -5.174211 | 0.684559 | H     | -2.736933 | 5.172734  | 0.682590 |
| C     | -3.613275 | 1.154958  | 2.136992 | C     | 3.613435  | -1.160558 | 2.132829 |
| N     | -4.580345 | 1.416011  | 2.723586 | N     | 4.584764  | -1.419949 | 2.714770 |
| ***** |           |           |          | ***** |           |           |          |

| 3-A-12-D-P1234-DMSO |           |           |           | 3-A-12-D-P1234-n-hexane |           |           |           |
|---------------------|-----------|-----------|-----------|-------------------------|-----------|-----------|-----------|
| C                   | -3.467523 | 2.810665  | -0.489227 | C                       | 3.472162  | -2.807879 | -0.491139 |
| C                   | -2.547357 | 2.406964  | 0.523004  | C                       | 2.549152  | -2.406460 | 0.517525  |
| C                   | -3.965376 | 1.894642  | -1.382782 | C                       | 3.971932  | -1.889825 | -1.381138 |
| H                   | -4.708777 | 2.209352  | -2.107993 | H                       | 4.717803  | -2.202215 | -2.104919 |
| C                   | -2.131787 | 1.068329  | 0.526722  | C                       | 2.132007  | -1.070124 | 0.522142  |
| H                   | -1.456288 | 0.733057  | 1.295357  | H                       | 1.455295  | -0.735537 | 1.289749  |
| C                   | -3.577518 | 0.535113  | -1.358230 | C                       | 3.582751  | -0.531699 | -1.355684 |
| C                   | -2.575399 | 0.130046  | -0.427298 | C                       | 2.577474  | -0.129242 | -0.428225 |
| C                   | -4.261213 | -0.434760 | -2.151337 | C                       | 4.266682  | 0.440493  | -2.145177 |
| H                   | -5.015532 | -0.095746 | -2.853742 | H                       | 5.023175  | 0.104058  | -2.846550 |
| C                   | -4.038731 | -1.762867 | -1.957703 | C                       | 4.041837  | 1.766837  | -1.949191 |
| H                   | -4.624953 | -2.508431 | -2.483243 | H                       | 4.627899  | 2.514257  | -2.472469 |
| C                   | -3.014997 | -2.212221 | -1.062453 | C                       | 3.016308  | 2.213520  | -1.055423 |
| C                   | -2.153462 | -1.273254 | -0.419163 | C                       | 2.154259  | 1.272971  | -0.416660 |
| C                   | -2.868777 | -3.599920 | -0.810870 | C                       | 2.867838  | 3.599429  | -0.800467 |
| H                   | -3.557998 | -4.290553 | -1.284214 | H                       | 3.557574  | 4.291972  | -1.270533 |
| C                   | -1.909093 | -4.054909 | 0.052746  | C                       | 1.906029  | 4.050921  | 0.062041  |
| H                   | -1.846789 | -5.106862 | 0.307984  | H                       | 1.841888  | 5.102535  | 0.319096  |
| C                   | -0.932211 | -3.165284 | 0.562435  | C                       | 0.929486  | 3.160218  | 0.568504  |
| C                   | -0.978407 | -1.788832 | 0.231753  | C                       | 0.977807  | 1.785175  | 0.233906  |
| C                   | 0.113899  | -3.690180 | 1.412024  | C                       | -0.118557 | 3.682309  | 1.418359  |
| H                   | 0.027895  | -4.727005 | 1.719811  | H                       | -0.032590 | 4.718340  | 1.729645  |
| C                   | 1.165391  | -2.945641 | 1.832835  | C                       | -1.169179 | 2.936614  | 1.835781  |
| H                   | 1.922415  | -3.361104 | 2.487005  | H                       | -1.929405 | 3.346393  | 2.489917  |
| C                   | 1.324455  | -1.625532 | 1.303992  | C                       | -1.325877 | 1.616121  | 1.304519  |
| C                   | 0.265383  | -1.038940 | 0.464443  | C                       | -0.265917 | 1.033021  | 0.461931  |
| C                   | 2.457578  | -0.831965 | 1.408012  | C                       | -2.457718 | 0.824417  | 1.408155  |
| H                   | -3.813050 | 3.833262  | -0.540719 | H                       | 3.818190  | -3.830350 | -0.543511 |
| C                   | 0.666964  | 0.129308  | -0.133256 | C                       | -0.666118 | -0.133523 | -0.139276 |
| P                   | 2.181817  | 0.753461  | 0.576385  | P                       | -2.181657 | -0.757591 | 0.571517  |
| C                   | 3.439063  | 0.906807  | -0.762038 | C                       | -3.438258 | -0.904536 | -0.768272 |
| C                   | 3.650655  | -0.106821 | -1.707916 | C                       | -3.624894 | 0.098303  | -1.729905 |
| C                   | 4.197180  | 2.081143  | -0.824821 | C                       | -4.223686 | -2.060878 | -0.815261 |
| C                   | 4.611303  | 0.057984  | -2.701299 | C                       | -4.586945 | -0.059152 | -2.722198 |
| H                   | 3.067426  | -1.019423 | -1.666705 | H                       | -3.020800 | 0.997602  | -1.699104 |
| C                   | 5.159637  | 2.241844  | -1.823403 | C                       | -5.188276 | -2.214187 | -1.812091 |
| H                   | 4.037936  | 2.868899  | -0.097301 | H                       | -4.084533 | -2.839434 | -0.073684 |
| C                   | 5.366531  | 1.232225  | -2.760247 | C                       | -5.369529 | -1.215231 | -2.764514 |
| H                   | 4.771053  | -0.728262 | -3.430346 | H                       | -4.728153 | 0.720131  | -3.462616 |
| H                   | 5.743550  | 3.153994  | -1.865717 | H                       | -5.795123 | -3.111949 | -1.840369 |
| H                   | 6.113496  | 1.356600  | -3.535918 | H                       | -6.119115 | -1.333211 | -3.538827 |
| H                   | 0.074378  | 0.706370  | -0.826258 | H                       | -0.070237 | -0.709105 | -0.830689 |

|       |           |           |          |       |           |           |          |
|-------|-----------|-----------|----------|-------|-----------|-----------|----------|
| N     | -2.083085 | 3.316357  | 1.458562 | N     | 2.082269  | -3.318953 | 1.452488 |
| C     | -1.330116 | 2.831034  | 2.608990 | C     | 1.313147  | -2.837128 | 2.591919 |
| H     | -1.005409 | 3.683604  | 3.202953 | H     | 0.984357  | -3.690773 | 3.182913 |
| H     | -1.925388 | 2.166685  | 3.251714 | H     | 1.894837  | -2.167914 | 3.242774 |
| H     | -0.435875 | 2.290703  | 2.290773 | H     | 0.419072  | -2.303928 | 2.261240 |
| C     | -2.757530 | 4.602490  | 1.609352 | C     | 2.764757  | -4.597245 | 1.610368 |
| H     | -3.804886 | 4.495504  | 1.924076 | H     | 3.812981  | -4.483449 | 1.922110 |
| H     | -2.231617 | 5.186492  | 2.362534 | H     | 2.244609  | -5.181361 | 2.368057 |
| H     | -2.733760 | 5.172796  | 0.678432 | H     | 2.742425  | -5.174869 | 0.683250 |
| C     | 3.614362  | -1.162316 | 2.129401 | C     | -3.613622 | 1.153595  | 2.137103 |
| N     | 4.588441  | -1.421040 | 2.707688 | N     | -4.580213 | 1.414902  | 2.724080 |
| ***** |           |           |          | ***** |           |           |          |

|                    |           |           |           |                     |           |           |           |
|--------------------|-----------|-----------|-----------|---------------------|-----------|-----------|-----------|
| 1-A-11-D-P1234-vac |           |           |           | 1-A-11-D-P1234-CCI4 |           |           |           |
| C                  | -3.630620 | -1.863981 | -0.333280 | C                   | -3.632287 | -1.870863 | -0.333418 |
| C                  | -2.574306 | -1.494427 | -1.213515 | C                   | -2.570658 | -1.501495 | -1.209369 |
| H                  | -2.329717 | -2.116306 | -2.063128 | H                   | -2.323665 | -2.123676 | -2.058062 |
| C                  | -3.968364 | -0.946874 | 0.665030  | C                   | -3.973575 | -0.951585 | 0.663685  |
| H                  | -4.817624 | -1.122628 | 1.311100  | H                   | -4.826489 | -1.125985 | 1.305269  |
| C                  | -1.848244 | -0.344298 | -1.016145 | C                   | -1.845187 | -0.351173 | -1.009870 |
| H                  | -1.067304 | -0.110560 | -1.726209 | C                   | -3.257836 | 0.245966  | 0.849083  |
| C                  | -3.252644 | 0.250750  | 0.848643  | C                   | -2.112518 | 0.541769  | 0.053230  |
| C                  | -2.110911 | 0.546293  | 0.049090  | C                   | -3.729394 | 1.223425  | 1.786840  |
| C                  | -3.720827 | 1.227835  | 1.787585  | H                   | -4.586227 | 0.980263  | 2.406194  |
| H                  | -4.575776 | 0.984806  | 2.409639  | C                   | -3.171067 | 2.459812  | 1.835270  |
| C                  | -3.162145 | 2.463696  | 1.834732  | H                   | -3.587253 | 3.228876  | 2.477481  |
| H                  | -3.576317 | 3.232685  | 2.478417  | C                   | -2.024109 | 2.790432  | 1.042271  |
| C                  | -2.016759 | 2.793644  | 1.039908  | C                   | -1.384790 | 1.778707  | 0.266121  |
| C                  | -1.380414 | 1.781566  | 0.261979  | C                   | -1.555333 | 4.122517  | 0.992717  |
| C                  | -1.544699 | 4.124175  | 0.991542  | H                   | -2.072256 | 4.879539  | 1.572921  |
| H                  | -2.059501 | 4.881877  | 1.572867  | C                   | -0.514432 | 4.468631  | 0.166654  |
| C                  | -0.502710 | 4.468044  | 0.166412  | H                   | -0.222295 | 5.506226  | 0.049307  |
| H                  | -0.207254 | 5.505014  | 0.050420  | C                   | 0.228868  | 3.467725  | -0.497212 |
| C                  | 0.237978  | 3.465919  | -0.497840 | C                   | -0.109665 | 2.099729  | -0.320034 |
| C                  | -0.104827 | 2.099195  | -0.323239 | C                   | 1.317524  | 3.855321  | -1.371509 |
| C                  | 1.328439  | 3.850320  | -1.370990 | H                   | 1.449122  | 4.915525  | -1.560874 |
| H                  | 1.462833  | 4.910373  | -1.559901 | C                   | 2.116227  | 2.947791  | -1.975293 |
| C                  | 2.125385  | 2.941740  | -1.974894 | H                   | 2.890526  | 3.248176  | -2.671713 |
| H                  | 2.901107  | 3.241590  | -2.670110 | C                   | 2.013182  | 1.563498  | -1.592694 |
| C                  | 2.018882  | 1.557077  | -1.594809 | C                   | 0.937748  | 1.143122  | -0.670219 |
| C                  | 0.939542  | 1.138460  | -0.675132 | C                   | 2.926927  | 0.585509  | -1.877101 |
| C                  | 2.930841  | 0.577458  | -1.877508 | H                   | 3.782361  | 0.715627  | -2.526598 |
| H                  | 3.789134  | 0.706550  | -2.523376 | C                   | 1.174656  | -0.125150 | -0.156708 |
| C                  | 1.170393  | -0.130188 | -0.162416 | P                   | 2.465199  | -0.966695 | -1.121444 |
| P                  | 2.460861  | -0.974451 | -1.123988 | C                   | 3.835231  | -1.423416 | 0.025347  |
| C                  | 3.827648  | -1.427096 | 0.029484  | C                   | 4.377856  | -0.513709 | 0.943597  |
| C                  | 4.344866  | -0.524551 | 0.968640  | C                   | 4.337015  | -2.727782 | -0.031264 |
| C                  | 4.353711  | -2.720626 | -0.043772 | C                   | 5.409734  | -0.908430 | 1.788988  |
| C                  | 5.375366  | -0.914965 | 1.817124  | H                   | 3.989289  | 0.496589  | 0.999199  |
| H                  | 3.935806  | 0.476780  | 1.037563  | C                   | 5.374473  | -3.119067 | 0.816395  |
| C                  | 5.390377  | -3.107694 | 0.806346  | H                   | 3.915969  | -3.438602 | -0.733422 |
| H                  | 3.950611  | -3.426591 | -0.761339 | C                   | 5.910317  | -2.210897 | 1.725358  |
| C                  | 5.900703  | -2.206268 | 1.735865  | H                   | 5.822694  | -0.201695 | 2.499953  |
| H                  | 5.767882  | -0.213603 | 2.544915  | H                   | 5.756447  | -4.132397 | 0.767667  |
| H                  | 5.791172  | -4.113080 | 0.744151  | H                   | 6.713340  | -2.514991 | 2.387239  |

|       |           |           |           |       |           |           |           |
|-------|-----------|-----------|-----------|-------|-----------|-----------|-----------|
| H     | 6.702725  | -2.507318 | 2.400465  | H     | -1.061871 | -0.118637 | -1.717797 |
| N     | -4.296455 | -3.069046 | -0.482945 | N     | -4.298064 | -3.072503 | -0.486509 |
| C     | -4.100519 | -3.864758 | -1.684777 | C     | -5.492643 | -3.331586 | 0.301790  |
| H     | -3.045966 | -4.116964 | -1.821125 | H     | -6.319427 | -2.649611 | 0.054566  |
| H     | -4.648302 | -4.800735 | -1.580814 | H     | -5.824324 | -4.352743 | 0.119300  |
| H     | -4.455331 | -3.358756 | -2.594750 | H     | -5.279687 | -3.238087 | 1.369798  |
| C     | -5.483531 | -3.329744 | 0.313181  | C     | -4.092929 | -3.873255 | -1.685499 |
| H     | -6.315115 | -2.650095 | 0.073296  | H     | -3.037777 | -4.126579 | -1.812932 |
| H     | -5.814684 | -4.352215 | 0.134704  | H     | -4.642891 | -4.807595 | -1.582420 |
| H     | -5.262112 | -3.235400 | 1.379602  | H     | -4.440811 | -3.368574 | -2.598207 |
| C     | 0.524279  | -0.783021 | 0.903193  | C     | 0.538901  | -0.775512 | 0.914655  |
| N     | 0.090666  | -1.354488 | 1.814488  | N     | 0.117178  | -1.346271 | 1.832784  |
| ***** |           |           |           | ***** |           |           |           |

| 1-A-11-D-P1234-DCM |           |           |           | 1-A-11-D-P1234-DMSO |           |           |           |
|--------------------|-----------|-----------|-----------|---------------------|-----------|-----------|-----------|
| C                  | -3.633308 | -1.876021 | -0.332451 | C                   | -3.633169 | -1.878723 | -0.331824 |
| C                  | -2.567839 | -1.506239 | -1.205779 | C                   | -2.565575 | -1.509097 | -1.203594 |
| H                  | -2.320544 | -2.127101 | -2.055336 | H                   | -2.317856 | -2.129322 | -2.053473 |
| C                  | -3.975616 | -0.955768 | 0.665416  | C                   | -3.976387 | -0.957932 | 0.665992  |
| H                  | -4.831950 | -1.128123 | 1.302974  | H                   | -4.834786 | -1.129004 | 1.301120  |
| C                  | -1.842043 | -0.356172 | -1.004213 | C                   | -1.839885 | -0.358967 | -1.001164 |
| H                  | -1.057714 | -0.124424 | -1.711338 | H                   | -1.055050 | -0.127562 | -1.707822 |
| C                  | -3.259310 | 0.241944  | 0.852198  | C                   | -3.260122 | 0.240197  | 0.853261  |
| C                  | -2.111732 | 0.538213  | 0.058212  | C                   | -2.111121 | 0.536289  | 0.060644  |
| C                  | -3.733094 | 1.219533  | 1.789695  | C                   | -3.735430 | 1.218155  | 1.790009  |
| H                  | -4.591893 | 0.976921  | 2.406474  | H                   | -4.595785 | 0.976291  | 2.404884  |
| C                  | -3.174420 | 2.456347  | 1.838937  | C                   | -3.176387 | 2.455098  | 1.839632  |
| H                  | -3.592304 | 3.225743  | 2.479529  | H                   | -3.595600 | 3.224942  | 2.478762  |
| C                  | -2.026511 | 2.787421  | 1.046733  | C                   | -2.027611 | 2.786046  | 1.048356  |
| C                  | -1.385591 | 1.776364  | 0.271045  | C                   | -1.385733 | 1.775092  | 0.273400  |
| C                  | -1.560290 | 4.121115  | 0.996373  | C                   | -1.562346 | 4.120455  | 0.997467  |
| H                  | -2.078064 | 4.877241  | 1.576771  | H                   | -2.080513 | 4.876306  | 1.577758  |
| C                  | -0.521562 | 4.469335  | 0.168206  | C                   | -0.524663 | 4.469393  | 0.168278  |
| H                  | -0.232265 | 5.507459  | 0.049946  | H                   | -0.236680 | 5.507746  | 0.049324  |
| C                  | 0.223240  | 3.469622  | -0.496975 | C                   | 0.220736  | 3.470055  | -0.497419 |
| C                  | -0.111463 | 2.100374  | -0.317750 | C                   | -0.112109 | 2.100346  | -0.316649 |
| C                  | 1.310033  | 3.860509  | -1.372316 | C                   | 1.306297  | 3.861899  | -1.373864 |
| H                  | 1.439254  | 4.920818  | -1.561534 | H                   | 1.434318  | 4.922132  | -1.563685 |
| C                  | 2.110533  | 2.953948  | -1.975797 | C                   | 2.107242  | 2.955463  | -1.977229 |
| H                  | 2.883789  | 3.254844  | -2.672910 | H                   | 2.879482  | 3.256263  | -2.675379 |
| C                  | 2.010365  | 1.570041  | -1.591179 | C                   | 2.008639  | 1.571947  | -1.590980 |
| C                  | 0.938086  | 1.147677  | -0.667432 | C                   | 0.938316  | 1.149371  | -0.665934 |
| C                  | 2.926044  | 0.593616  | -1.876929 | C                   | 2.924885  | 0.595884  | -1.877113 |
| H                  | 3.779208  | 0.724872  | -2.529155 | H                   | 3.776856  | 0.726999  | -2.530890 |
| C                  | 1.179363  | -0.121495 | -0.154696 | C                   | 1.181624  | -0.119818 | -0.152485 |
| P                  | 2.470534  | -0.959692 | -1.122542 | P                   | 2.472110  | -0.957438 | -1.122259 |
| C                  | 3.840235  | -1.422772 | 0.021218  | C                   | 3.842300  | -1.422553 | 0.019793  |
| C                  | 4.405973  | -0.508236 | 0.921241  | C                   | 4.418877  | -0.505545 | 0.910678  |
| C                  | 4.317747  | -2.737260 | -0.019051 | C                   | 4.309426  | -2.741160 | -0.012910 |
| C                  | 5.436463  | -0.908969 | 1.766193  | C                   | 5.449408  | -0.908295 | 1.754914  |
| H                  | 4.039208  | 0.510876  | 0.962352  | H                   | 4.061979  | 0.517337  | 0.944456  |
| C                  | 5.353248  | -3.134477 | 0.828798  | C                   | 5.344718  | -3.140369 | 0.834488  |
| H                  | 3.881862  | -3.450714 | -0.709241 | H                   | 3.866967  | -3.455892 | -0.697528 |
| C                  | 5.911987  | -2.221973 | 1.720162  | C                   | 5.913997  | -2.225654 | 1.717157  |
| H                  | 5.868911  | -0.198357 | 2.461420  | H                   | 5.891212  | -0.195594 | 2.442031  |

|       |           |           |           |       |           |           |           |
|-------|-----------|-----------|-----------|-------|-----------|-----------|-----------|
| H     | 5.717169  | -4.154838 | 0.792310  | H     | 5.701164  | -4.163502 | 0.803372  |
| H     | 6.714566  | -2.530189 | 2.380528  | H     | 6.717161  | -2.535139 | 2.376153  |
| N     | -4.299531 | -3.074867 | -0.488251 | N     | -4.299366 | -3.076853 | -0.488337 |
| C     | -4.095742 | -3.873707 | -1.691094 | C     | -5.509757 | -3.326111 | 0.283679  |
| H     | -3.040719 | -4.123878 | -1.822496 | H     | -6.325014 | -2.637236 | 0.021404  |
| H     | -4.643679 | -4.808804 | -1.587715 | H     | -5.846250 | -4.344102 | 0.095648  |
| H     | -4.448101 | -3.366669 | -2.600102 | H     | -5.313557 | -3.232505 | 1.354575  |
| C     | -5.504389 | -3.328069 | 0.289641  | C     | -4.096872 | -3.874405 | -1.693271 |
| H     | -6.323874 | -2.641916 | 0.032428  | H     | -3.041753 | -4.121508 | -1.828150 |
| H     | -5.838713 | -4.347302 | 0.103616  | H     | -4.642265 | -4.810747 | -1.588905 |
| H     | -5.302306 | -3.234340 | 1.359489  | H     | -4.453385 | -3.366889 | -2.600108 |
| C     | 0.551281  | -0.768777 | 0.920262  | C     | 0.556494  | -0.763859 | 0.924763  |
| N     | 0.135247  | -1.337058 | 1.843696  | N     | 0.141219  | -1.328384 | 1.851465  |
| ***** |           |           |           | ***** |           |           |           |

|                         |           |           |           |                    |           |           |           |
|-------------------------|-----------|-----------|-----------|--------------------|-----------|-----------|-----------|
| 1-A-11-D-P1234-n-hexane |           |           |           | 3-A-10-D-P1234-vac |           |           |           |
| C                       | -3.632118 | -1.869749 | -0.333502 | C                  | -3.390802 | -2.076838 | -1.511746 |
| C                       | -2.571162 | -1.500515 | -1.209926 | C                  | -2.252610 | -1.492027 | -2.090553 |
| H                       | -2.324281 | -2.122837 | -2.058548 | C                  | -3.985887 | -1.501548 | -0.402637 |
| C                       | -3.972997 | -0.950735 | 0.663616  | C                  | -1.673210 | -0.374192 | -1.534212 |
| H                       | -4.825316 | -1.125383 | 1.305926  | H                  | -0.825288 | 0.077868  | -2.025366 |
| C                       | -1.845629 | -0.350210 | -1.010771 | C                  | -3.390579 | -0.343883 | 0.192484  |
| H                       | -1.062522 | -0.117601 | -1.718886 | C                  | -2.183259 | 0.197269  | -0.344468 |
| C                       | -3.257282 | 0.246797  | 0.848759  | C                  | -4.030403 | 0.318962  | 1.287387  |
| C                       | -2.112399 | 0.542466  | 0.052497  | H                  | -4.889895 | -0.151949 | 1.744664  |
| C                       | -3.728370 | 1.224232  | 1.786599  | C                  | -3.601096 | 1.540821  | 1.695717  |
| H                       | -4.584945 | 0.981103  | 2.406332  | H                  | -4.140887 | 2.086505  | 2.462606  |
| C                       | -3.169975 | 2.460506  | 1.834882  | C                  | -2.415152 | 2.133017  | 1.158116  |
| H                       | -3.585856 | 3.229556  | 2.477326  | C                  | -1.590326 | 1.383271  | 0.272304  |
| C                       | -2.023185 | 2.790974  | 1.041724  | C                  | -2.061366 | 3.456566  | 1.516463  |
| C                       | -1.384266 | 1.779143  | 0.265403  | H                  | -2.724860 | 4.016853  | 2.166225  |
| C                       | -1.553859 | 4.122777  | 0.992373  | C                  | -0.928755 | 4.032278  | 1.008636  |
| H                       | -2.070511 | 4.879930  | 1.572676  | H                  | -0.695252 | 5.071269  | 1.213894  |
| C                       | -0.512687 | 4.468498  | 0.166576  | C                  | -0.000692 | 3.253232  | 0.276584  |
| H                       | -0.219986 | 5.505988  | 0.049429  | C                  | -0.267286 | 1.888354  | 0.011598  |
| C                       | 0.230220  | 3.467367  | -0.497239 | C                  | 1.226239  | 3.872596  | -0.177785 |
| C                       | -0.109018 | 2.099605  | -0.320442 | H                  | 1.317075  | 4.945848  | -0.045595 |
| C                       | 1.319135  | 3.854367  | -1.371422 | C                  | 2.230899  | 3.175005  | -0.757209 |
| H                       | 1.451157  | 4.914544  | -1.560803 | H                  | 3.131109  | 3.663843  | -1.110172 |
| C                       | 2.117487  | 2.946656  | -1.975289 | C                  | 2.139284  | 1.745993  | -0.800249 |
| H                       | 2.891924  | 3.246953  | -2.671628 | C                  | 0.896450  | 1.076699  | -0.375792 |
| C                       | 2.013936  | 1.562314  | -1.593046 | C                  | 3.169352  | 0.874076  | -1.106032 |
| C                       | 0.937937  | 1.142296  | -0.670857 | H                  | -3.831248 | -2.951692 | -1.973704 |
| C                       | 2.927338  | 0.584024  | -1.877182 | C                  | 1.052315  | -0.281964 | -0.262640 |
| H                       | 3.783255  | 0.713928  | -2.526080 | P                  | 2.573564  | -0.833085 | -1.019520 |
| C                       | 1.173940  | -0.125901 | -0.157278 | C                  | 3.579311  | -1.705155 | 0.254863  |
| P                       | 2.464357  | -0.967997 | -1.121527 | C                  | 3.708272  | -1.222419 | 1.564444  |
| C                       | 3.834195  | -1.423854 | 0.026003  | C                  | 4.231744  | -2.886513 | -0.111760 |
| C                       | 4.373271  | -0.514986 | 0.947059  | C                  | 4.480921  | -1.916294 | 2.489596  |
| C                       | 4.339583  | -2.726651 | -0.032932 | H                  | 3.206812  | -0.306513 | 1.854625  |
| C                       | 5.405157  | -0.908863 | 1.792716  | C                  | 5.007632  | -3.578327 | 0.818921  |
| H                       | 3.981540  | 0.493977  | 1.004606  | H                  | 4.136229  | -3.264092 | -1.123607 |
| C                       | 5.377137  | -3.117117 | 0.814893  | C                  | 5.131713  | -3.094543 | 2.118006  |
| H                       | 3.920922  | -3.436949 | -0.737068 | H                  | 4.578357  | -1.537476 | 3.500821  |
| C                       | 5.909419  | -2.209708 | 1.726584  | H                  | 5.513212  | -4.491346 | 0.525849  |

|       |           |           |           |       |           |           |           |
|-------|-----------|-----------|-----------|-------|-----------|-----------|-----------|
| H     | 5.815183  | -0.202756 | 2.506023  | H     | 5.734782  | -3.631185 | 2.841724  |
| H     | 5.761844  | -4.129341 | 0.764336  | H     | 0.288185  | -0.967003 | 0.071079  |
| H     | 6.712424  | -2.513217 | 2.388780  | C     | 4.460412  | 1.254233  | -1.516347 |
| N     | -4.297964 | -3.071940 | -0.486035 | N     | 5.532471  | 1.553683  | -1.842623 |
| C     | -4.093685 | -3.872414 | -1.684949 | H     | -1.843080 | -1.911715 | -3.002657 |
| H     | -3.038606 | -4.125977 | -1.812951 | N     | -5.197640 | -2.011511 | 0.159117  |
| H     | -4.643682 | -4.806808 | -1.581792 | C     | -5.380125 | -3.455683 | 0.076735  |
| H     | -4.441846 | -3.367806 | -2.597713 | H     | -6.201467 | -3.742828 | 0.738695  |
| C     | -5.491156 | -3.331400 | 0.303688  | H     | -5.630263 | -3.814922 | -0.936051 |
| H     | -6.318741 | -2.649697 | 0.057969  | H     | -4.475576 | -3.964519 | 0.412966  |
| H     | -5.822854 | -4.352717 | 0.121695  | C     | -6.401445 | -1.292060 | -0.268944 |
| H     | -5.276599 | -3.238050 | 1.371431  | H     | -6.666486 | -1.515164 | -1.316016 |
| C     | 0.536571  | -0.776665 | 0.913305  | H     | -7.242641 | -1.580454 | 0.367560  |
| N     | 0.113235  | -1.347546 | 1.830436  | H     | -6.255412 | -0.215802 | -0.179085 |
| ***** |           |           |           | ***** |           |           |           |

|                     |           |           |           |                    |           |           |           |
|---------------------|-----------|-----------|-----------|--------------------|-----------|-----------|-----------|
| 3-A-10-D-P1234-CCI4 |           |           |           | 3-A-10-D-P1234-DCM |           |           |           |
| C                   | -3.384157 | -2.078590 | -1.511504 | C                  | -3.382051 | -2.079493 | -1.510594 |
| C                   | -2.247542 | -1.490866 | -2.090940 | C                  | -2.246425 | -1.490373 | -2.091080 |
| C                   | -3.981838 | -1.504163 | -0.402684 | C                  | -3.980884 | -1.505372 | -0.401578 |
| C                   | -1.670035 | -0.371471 | -1.535194 | C                  | -1.669173 | -0.370187 | -1.536114 |
| H                   | -0.823120 | 0.081890  | -2.027039 | H                  | -0.822321 | 0.082866  | -2.028497 |
| C                   | -3.388457 | -0.344023 | 0.191589  | C                  | -3.388089 | -0.343144 | 0.191534  |
| C                   | -2.181689 | 0.198978  | -0.345453 | C                  | -2.181451 | 0.200255  | -0.346344 |
| C                   | -4.028413 | 0.318744  | 1.286768  | C                  | -4.026925 | 0.320733  | 1.287137  |
| H                   | -4.888735 | -0.150445 | 1.743994  | H                  | -4.888663 | -0.144799 | 1.745274  |
| C                   | -3.600726 | 1.541208  | 1.696080  | C                  | -3.599211 | 1.543531  | 1.696649  |
| H                   | -4.141797 | 2.086121  | 2.462443  | H                  | -4.140776 | 2.088755  | 2.462244  |
| C                   | -2.415303 | 2.134689  | 1.158387  | C                  | -2.413954 | 2.136821  | 1.158031  |
| C                   | -1.590273 | 1.385575  | 0.271962  | C                  | -1.589903 | 1.387120  | 0.270863  |
| C                   | -2.063314 | 3.459109  | 1.517114  | C                  | -2.062253 | 3.461898  | 1.516570  |
| H                   | -2.727403 | 4.018384  | 2.166984  | H                  | -2.725746 | 4.020939  | 2.167054  |
| C                   | -0.931574 | 4.036708  | 1.008895  | C                  | -0.931115 | 4.039963  | 1.006941  |
| H                   | -0.699711 | 5.076095  | 1.213381  | H                  | -0.699470 | 5.079479  | 1.210256  |
| C                   | -0.002875 | 3.257727  | 0.276847  | C                  | -0.002962 | 3.259915  | 0.274555  |
| C                   | -0.267727 | 1.892393  | 0.011839  | C                  | -0.267524 | 1.894284  | 0.010024  |
| C                   | 1.222864  | 3.877775  | -0.178595 | C                  | 1.222054  | 3.879576  | -0.182340 |
| H                   | 1.313391  | 4.950984  | -0.046881 | H                  | 1.313358  | 4.952558  | -0.050625 |
| C                   | 2.228506  | 3.180826  | -0.758756 | C                  | 2.227644  | 3.182134  | -0.763617 |
| H                   | 3.126600  | 3.673267  | -1.111889 | H                  | 3.124293  | 3.676865  | -1.117097 |
| C                   | 2.139230  | 1.752137  | -0.799144 | C                  | 2.139027  | 1.753959  | -0.801740 |
| C                   | 0.896887  | 1.082563  | -0.375575 | C                  | 0.897007  | 1.085071  | -0.377927 |
| C                   | 3.169811  | 0.878173  | -1.103980 | C                  | 3.169212  | 0.877230  | -1.106194 |
| H                   | -3.821423 | -2.954931 | -1.973245 | H                  | -3.817060 | -2.956994 | -1.971825 |
| C                   | 1.053866  | -0.276073 | -0.261608 | C                  | 1.054096  | -0.273549 | -0.262376 |
| P                   | 2.574440  | -0.829581 | -1.016241 | P                  | 2.573395  | -0.830988 | -1.015355 |
| C                   | 3.577886  | -1.706311 | 0.255962  | C                  | 3.576941  | -1.706353 | 0.257498  |
| C                   | 3.719839  | -1.218488 | 1.562634  | C                  | 3.727247  | -1.211440 | 1.560945  |
| C                   | 4.213329  | -2.897619 | -0.109501 | C                  | 4.202641  | -2.904346 | -0.104165 |
| C                   | 4.489223  | -1.917895 | 2.486820  | C                  | 4.495977  | -1.910855 | 2.486257  |
| H                   | 3.231545  | -0.295434 | 1.852635  | H                  | 3.245845  | -0.284133 | 1.848933  |
| C                   | 4.985472  | -3.594963 | 0.820608  | C                  | 4.973841  | -3.601638 | 0.827324  |
| H                   | 4.107612  | -3.279405 | -1.118669 | H                  | 4.089506  | -3.292557 | -1.109987 |
| C                   | 5.122971  | -3.106392 | 2.116965  | C                  | 5.120158  | -3.106187 | 2.120573  |
| H                   | 4.596594  | -1.535914 | 3.495758  | H                  | 4.609007  | -1.524370 | 3.492779  |

|       |           |           |           |       |           |           |           |
|-------|-----------|-----------|-----------|-------|-----------|-----------|-----------|
| H     | 5.477307  | -4.515897 | 0.529168  | H     | 5.457015  | -4.528251 | 0.539687  |
| H     | 5.722926  | -3.647335 | 2.839960  | H     | 5.718514  | -3.647483 | 2.844525  |
| H     | 0.292078  | -0.961775 | 0.076247  | H     | 0.294098  | -0.959132 | 0.079809  |
| C     | 4.458960  | 1.256867  | -1.516039 | C     | 4.457647  | 1.252311  | -1.517431 |
| N     | 5.532262  | 1.552059  | -1.844886 | N     | 5.533892  | 1.540978  | -1.845524 |
| H     | -1.837597 | -1.910339 | -3.002962 | H     | -1.836797 | -1.910600 | -3.002878 |
| N     | -5.189901 | -2.019226 | 0.160274  | N     | -5.184989 | -2.025074 | 0.164002  |
| C     | -6.397216 | -1.294210 | -0.252962 | C     | -6.396046 | -1.293254 | -0.231490 |
| H     | -6.666848 | -1.507434 | -1.300521 | H     | -6.671464 | -1.494964 | -1.279372 |
| H     | -7.234211 | -1.590402 | 0.384950  | H     | -7.228198 | -1.598119 | 0.408092  |
| H     | -6.251950 | -0.218944 | -0.152849 | H     | -6.251044 | -0.219405 | -0.118917 |
| C     | -5.376049 | -3.462956 | 0.056960  | C     | -5.376832 | -3.467771 | 0.037797  |
| H     | -6.196235 | -3.756829 | 0.716996  | H     | -6.195150 | -3.768364 | 0.696703  |
| H     | -5.630191 | -3.805129 | -0.960124 | H     | -5.637202 | -3.790507 | -0.983334 |
| H     | -4.471895 | -3.979347 | 0.382584  | H     | -4.473157 | -3.993302 | 0.349897  |
| ***** |           |           |           | ***** |           |           |           |

| 3-A-10-D-P1234-DMSO |           |           |           | 3-A-10-D-P1234-n-hexane |           |           |           |
|---------------------|-----------|-----------|-----------|-------------------------|-----------|-----------|-----------|
| C                   | -3.383655 | -2.079550 | -1.509783 | C                       | -3.384955 | -2.078430 | -1.511584 |
| C                   | -2.247989 | -1.490778 | -2.090691 | C                       | -2.248143 | -1.491052 | -2.090906 |
| C                   | -3.982265 | -1.505278 | -0.400425 | C                       | -3.982266 | -1.503944 | -0.402734 |
| C                   | -1.669979 | -0.370693 | -1.536090 | C                       | -1.670447 | -0.371875 | -1.535034 |
| H                   | -0.822813 | 0.081534  | -2.028738 | H                       | -0.823433 | 0.081409  | -2.026751 |
| C                   | -3.388658 | -0.342810 | 0.192371  | C                       | -3.388705 | -0.344167 | 0.191690  |
| C                   | -2.181933 | 0.200117  | -0.346238 | C                       | -2.181906 | 0.198672  | -0.345293 |
| C                   | -4.026104 | 0.321660  | 1.288640  | C                       | -4.028789 | 0.318534  | 1.286764  |
| H                   | -4.888288 | -0.141984 | 1.747831  | H                       | -4.888888 | -0.151152 | 1.743945  |
| C                   | -3.597665 | 1.544434  | 1.697961  | C                       | -3.601011 | 1.540961  | 1.695894  |
| H                   | -4.138690 | 2.089948  | 2.463648  | H                       | -4.141966 | 2.085943  | 2.462327  |
| C                   | -2.412693 | 2.137335  | 1.158137  | C                       | -2.415538 | 2.134352  | 1.158295  |
| C                   | -1.589625 | 1.386982  | 0.270480  | C                       | -1.590399 | 1.385223  | 0.272042  |
| C                   | -2.060690 | 3.462729  | 1.515963  | C                       | -2.063405 | 3.458665  | 1.516950  |
| H                   | -2.723498 | 4.022034  | 2.166841  | H                       | -2.727527 | 4.018064  | 2.166710  |
| C                   | -0.929935 | 4.040540  | 1.004952  | C                       | -0.931534 | 4.036046  | 1.008898  |
| H                   | -0.697997 | 5.080114  | 1.207337  | H                       | -0.699512 | 5.075393  | 1.213532  |
| C                   | -0.002477 | 3.259660  | 0.272283  | C                       | -0.002791 | 3.257147  | 0.276945  |
| C                   | -0.267326 | 1.893881  | 0.008534  | C                       | -0.267788 | 1.891866  | 0.011941  |
| C                   | 1.222223  | 3.878820  | -0.185852 | C                       | 1.223128  | 3.877180  | -0.178229 |
| H                   | 1.314055  | 4.951721  | -0.054401 | H                       | 1.313583  | 4.950419  | -0.046495 |
| C                   | 2.227356  | 3.180775  | -0.767759 | C                       | 2.228720  | 3.180213  | -0.758159 |
| H                   | 3.123489  | 3.675945  | -1.121911 | H                       | 3.127147  | 3.672107  | -1.111240 |
| C                   | 2.138620  | 1.752796  | -0.804629 | C                       | 2.139194  | 1.751449  | -0.798953 |
| C                   | 0.896850  | 1.084490  | -0.379757 | C                       | 0.896780  | 1.081827  | -0.375340 |
| C                   | 3.168301  | 0.874761  | -1.109007 | C                       | 3.169796  | 0.877942  | -1.103894 |
| H                   | -3.818512 | -2.957073 | -1.970922 | H                       | -3.822665 | -2.954559 | -1.973382 |
| C                   | 1.053900  | -0.274033 | -0.262751 | C                       | 1.053658  | -0.276817 | -0.261536 |
| P                   | 2.572351  | -0.833585 | -1.015607 | P                       | 2.574429  | -0.829671 | -1.016486 |
| C                   | 3.577500  | -1.705733 | 0.258333  | C                       | 3.578220  | -1.706157 | 0.255681  |
| C                   | 3.733124  | -1.204850 | 1.559035  | C                       | 3.718674  | -1.219312 | 1.562818  |
| C                   | 4.198794  | -2.907251 | -0.099688 | C                       | 4.215788  | -2.896114 | -0.110258 |
| C                   | 4.503057  | -1.901901 | 2.485375  | C                       | 4.488547  | -1.918237 | 2.486864  |
| H                   | 3.254705  | -0.275253 | 1.844634  | H                       | 3.228788  | -0.297171 | 1.853034  |
| C                   | 4.971069  | -3.602193 | 0.832917  | C                       | 4.988484  | -3.592988 | 0.819652  |
| H                   | 4.080996  | -3.300575 | -1.102953 | H                       | 4.111324  | -3.277031 | -1.119899 |
| C                   | 5.122929  | -3.100804 | 2.123423  | C                       | 5.124406  | -3.105341 | 2.116441  |

|       |           |           |           |       |           |           |           |
|-------|-----------|-----------|-----------|-------|-----------|-----------|-----------|
| H     | 4.619738  | -1.511193 | 3.489820  | H     | 4.594839  | -1.536850 | 3.496156  |
| H     | 5.450213  | -4.531843 | 0.548465  | H     | 5.482108  | -4.512818 | 0.527703  |
| H     | 5.721680  | -3.640478 | 2.848219  | H     | 5.724892  | -3.645882 | 2.839316  |
| H     | 0.294587  | -0.959307 | 0.081578  | H     | 0.291479  | -0.962469 | 0.075511  |
| C     | 4.456840  | 1.247700  | -1.519444 | C     | 4.459241  | 1.257102  | -1.515745 |
| N     | 5.534701  | 1.532869  | -1.846395 | N     | 5.532204  | 1.553290  | -1.844256 |
| H     | -1.838808 | -1.911682 | -3.002368 | H     | -1.838219 | -1.910482 | -3.002952 |
| N     | -5.184930 | -2.026164 | 0.166390  | N     | -5.191046 | -2.018103 | 0.159986  |
| C     | -6.397019 | -1.290033 | -0.219931 | C     | -6.397721 | -1.294171 | -0.256218 |
| H     | -6.676257 | -1.486099 | -1.267709 | H     | -6.666391 | -1.509424 | -1.303676 |
| H     | -7.226853 | -1.597881 | 0.421011  | H     | -7.235544 | -1.588778 | 0.381433  |
| H     | -6.250774 | -0.217052 | -0.101684 | H     | -6.252307 | -0.218695 | -0.158258 |
| C     | -5.380844 | -3.467950 | 0.029569  | C     | -5.376455 | -3.461970 | 0.060709  |
| H     | -6.198117 | -3.771065 | 0.688445  | H     | -6.197010 | -3.754519 | 0.720939  |
| H     | -5.645104 | -3.781403 | -0.993157 | H     | -5.629630 | -3.807444 | -0.955609 |
| H     | -4.477666 | -3.998508 | 0.334588  | H     | -4.472312 | -3.976924 | 0.388621  |
| ***** |           |           |           | ***** |           |           |           |

|                    |           |           |           |                     |           |           |           |
|--------------------|-----------|-----------|-----------|---------------------|-----------|-----------|-----------|
| 1-D-13-A-1P234-vac |           |           |           | 1-D-13-A-1P234-CCl4 |           |           |           |
| C                  | -5.318457 | -0.236886 | -0.270490 | C                   | -5.314603 | -0.253459 | -0.256397 |
| C                  | -4.327582 | -0.898346 | -1.002093 | C                   | -4.324648 | -0.913594 | -0.990553 |
| H                  | -4.576011 | -1.767712 | -1.598224 | H                   | -4.573524 | -1.786514 | -1.581152 |
| C                  | -5.007648 | 0.948885  | 0.361219  | C                   | -5.006046 | 0.937300  | 0.367569  |
| H                  | -5.782432 | 1.524040  | 0.857174  | H                   | -5.781277 | 1.511025  | 0.864250  |
| C                  | -3.015432 | -0.428244 | -1.013599 | C                   | -3.014811 | -0.436450 | -1.009761 |
| C                  | -3.696419 | 1.470895  | 0.333500  | C                   | -3.696987 | 1.464993  | 0.332127  |
| C                  | -2.635179 | 0.724257  | -0.261397 | C                   | -2.635051 | 0.720107  | -0.263283 |
| C                  | -3.448581 | 2.800862  | 0.808051  | C                   | -3.452970 | 2.798222  | 0.800220  |
| H                  | -4.266458 | 3.350332  | 1.261097  | H                   | -4.271545 | 3.346269  | 1.253374  |
| C                  | -2.248886 | 3.391972  | 0.586570  | C                   | -2.255732 | 3.392879  | 0.573169  |
| H                  | -2.091724 | 4.435864  | 0.836071  | H                   | -2.101479 | 4.438382  | 0.817244  |
| C                  | -1.143383 | 2.652756  | 0.050217  | C                   | -1.148704 | 2.654121  | 0.038538  |
| C                  | -1.279058 | 1.246844  | -0.185385 | C                   | -1.280771 | 1.247064  | -0.192099 |
| C                  | 0.075480  | 3.310115  | -0.217538 | C                   | 0.068785  | 3.313579  | -0.231969 |
| H                  | 0.141643  | 4.379906  | -0.051949 | H                   | 0.132263  | 4.384101  | -0.070785 |
| C                  | 1.145179  | 2.607251  | -0.730067 | C                   | 1.140815  | 2.611021  | -0.740926 |
| H                  | 2.048157  | 3.122340  | -1.038626 | H                   | 2.042294  | 3.127720  | -1.051008 |
| C                  | 1.082426  | 1.210412  | -0.768434 | C                   | 1.081244  | 1.213478  | -0.773573 |
| C                  | -0.067287 | 0.499774  | -0.362109 | C                   | -0.067476 | 0.501990  | -0.366110 |
| C                  | 1.465112  | -1.317122 | -0.720282 | C                   | 1.465085  | -1.315556 | -0.721684 |
| H                  | -6.330645 | -0.623231 | -0.256238 | H                   | -6.324580 | -0.644753 | -0.234822 |
| C                  | 3.815306  | 0.299115  | -0.306844 | C                   | 3.816283  | 0.301699  | -0.305083 |
| C                  | 4.845207  | 0.397293  | 1.885329  | C                   | 4.837663  | 0.428564  | 1.890045  |
| C                  | 5.065963  | 0.539451  | -0.886149 | C                   | 5.073563  | 0.507790  | -0.883794 |
| C                  | 6.089316  | 0.638293  | 1.297740  | C                   | 6.088886  | 0.634160  | 1.303219  |
| C                  | 6.198885  | 0.708824  | -0.087817 | C                   | 6.205982  | 0.673238  | -0.083387 |
| H                  | 5.153859  | 0.592996  | -1.966169 | H                   | 5.168135  | 0.538553  | -1.964064 |
| H                  | 7.162121  | 0.893872  | -0.550209 | H                   | 7.174302  | 0.831578  | -0.544935 |
| P                  | 2.363630  | 0.100525  | -1.448247 | P                   | 2.365533  | 0.103367  | -1.446658 |
| C                  | 0.230140  | -0.940370 | -0.142932 | C                   | 0.230551  | -0.937631 | -0.143623 |
| C                  | -0.470418 | -1.912439 | 0.625767  | C                   | -0.470011 | -1.908371 | 0.628326  |
| C                  | -0.003835 | -3.235511 | 0.602592  | C                   | -0.007508 | -3.233763 | 0.598838  |
| C                  | 1.150574  | -3.600743 | -0.085061 | C                   | 1.145658  | -3.600040 | -0.090853 |
| C                  | 1.913484  | -2.633037 | -0.727019 | C                   | 1.911809  | -2.632370 | -0.730668 |
| H                  | -0.536330 | -3.993993 | 1.160528  | H                   | -0.540601 | -3.992505 | 1.155706  |

|   |           |           |           |   |           |           |           |
|---|-----------|-----------|-----------|---|-----------|-----------|-----------|
| H | 1.473518  | -4.635887 | -0.076351 | H | 1.466122  | -4.636008 | -0.084315 |
| H | 2.844934  | -2.896734 | -1.214882 | H | 2.843485  | -2.897175 | -1.217547 |
| C | 3.716650  | 0.228526  | 1.089700  | C | 3.709588  | 0.263080  | 1.092388  |
| H | 6.967433  | 0.768527  | 1.920473  | H | 6.966348  | 0.762054  | 1.927260  |
| H | 4.757404  | 0.340061  | 2.964864  | H | 4.743790  | 0.396579  | 2.970041  |
| H | 2.755515  | 0.037109  | 1.553302  | H | 2.743209  | 0.100574  | 1.556252  |
| N | -1.592814 | -1.557208 | 1.408307  | N | -1.584882 | -1.551552 | 1.417470  |
| C | -2.510380 | -2.616699 | 1.797223  | C | -1.320384 | -0.616304 | 2.512912  |
| H | -3.431108 | -2.159674 | 2.167894  | H | -2.258585 | -0.161304 | 2.839966  |
| H | -2.762177 | -3.234438 | 0.934287  | H | -0.862621 | -1.127372 | 3.375446  |
| H | -2.116077 | -3.269037 | 2.594665  | H | -0.651441 | 0.179111  | 2.193076  |
| C | -1.333491 | -0.632015 | 2.512249  | C | -2.496581 | -2.611262 | 1.822934  |
| H | -2.273351 | -0.179743 | 2.839099  | H | -3.411616 | -2.153166 | 2.205428  |
| H | -0.878125 | -1.148751 | 3.373210  | H | -2.760572 | -3.232486 | 0.966229  |
| H | -0.664591 | 0.166904  | 2.200686  | H | -2.089713 | -3.259430 | 2.616682  |
| C | -2.141891 | -1.072231 | -1.947725 | C | -2.146536 | -1.074634 | -1.952288 |
| N | -1.539297 | -1.603067 | -2.779491 | N | -1.551967 | -1.599138 | -2.794306 |

| 1-D-13-A-1P234-DCM |           |           |           | 1-D-13-A-1P234-DMSO |           |           |           |
|--------------------|-----------|-----------|-----------|---------------------|-----------|-----------|-----------|
| C                  | -5.308799 | -0.283257 | -0.242866 | C                   | -5.306505 | -0.299203 | -0.235329 |
| C                  | -4.317939 | -0.940339 | -0.978611 | C                   | -4.315001 | -0.955275 | -0.971052 |
| H                  | -4.564451 | -1.818864 | -1.561711 | H                   | -4.559839 | -1.837128 | -1.549760 |
| C                  | -5.006375 | 0.914382  | 0.371514  | C                   | -5.007276 | 0.902119  | 0.373641  |
| H                  | -5.783584 | 1.484415  | 0.868950  | H                   | -5.785427 | 1.470567  | 0.871179  |
| C                  | -3.011908 | -0.452305 | -1.006121 | C                   | -3.010891 | -0.461897 | -1.002855 |
| C                  | -3.701219 | 1.451864  | 0.327341  | C                   | -3.704180 | 1.444522  | 0.324891  |
| C                  | -2.636504 | 0.710922  | -0.267251 | C                   | -2.637928 | 0.705435  | -0.268928 |
| C                  | -3.464731 | 2.789658  | 0.787054  | C                   | -3.471759 | 2.784705  | 0.779930  |
| H                  | -4.285288 | 3.334352  | 1.240252  | H                   | -4.293367 | 3.327601  | 1.233224  |
| C                  | -2.271713 | 3.391070  | 0.553581  | C                   | -2.281074 | 3.389622  | 0.542922  |
| H                  | -2.123521 | 4.438742  | 0.791395  | H                   | -2.136088 | 4.438377  | 0.777590  |
| C                  | -1.160985 | 2.655149  | 0.021741  | C                   | -1.168446 | 2.655389  | 0.012341  |
| C                  | -1.285743 | 1.246271  | -0.201649 | C                   | -1.289025 | 1.245441  | -0.206938 |
| C                  | 0.053562  | 3.319221  | -0.252946 | C                   | 0.044129  | 3.322324  | -0.265046 |
| H                  | 0.112068  | 4.390820  | -0.098001 | H                   | 0.099706  | 4.394486  | -0.113365 |
| C                  | 1.129737  | 2.618718  | -0.757039 | C                   | 1.122551  | 2.623389  | -0.766835 |
| H                  | 2.028453  | 3.138811  | -1.069322 | H                   | 2.019708  | 3.145424  | -1.080308 |
| C                  | 1.077008  | 1.220200  | -0.781191 | C                   | 1.073939  | 1.224447  | -0.786492 |
| C                  | -0.069009 | 0.505992  | -0.371151 | C                   | -0.070151 | 0.508173  | -0.374649 |
| C                  | 1.466219  | -1.309998 | -0.722882 | C                   | 1.467790  | -1.305734 | -0.725081 |
| H                  | -6.315048 | -0.682888 | -0.212549 | H                   | -6.310848 | -0.702972 | -0.200508 |
| C                  | 3.815814  | 0.310227  | -0.303744 | C                   | 3.814599  | 0.316579  | -0.303075 |
| C                  | 4.823922  | 0.490038  | 1.894144  | C                   | 4.814621  | 0.522927  | 1.896232  |
| C                  | 5.083497  | 0.451541  | -0.879710 | C                   | 5.087383  | 0.423629  | -0.875379 |
| C                  | 6.086173  | 0.628654  | 1.310417  | C                   | 6.082204  | 0.626126  | 1.316441  |
| C                  | 6.215070  | 0.608920  | -0.076014 | C                   | 6.217668  | 0.576046  | -0.068786 |
| H                  | 5.188075  | 0.439086  | -1.959333 | H                   | 5.197460  | 0.388641  | -1.953926 |
| H                  | 7.191495  | 0.716680  | -0.534836 | H                   | 7.198117  | 0.657024  | -0.524420 |
| P                  | 2.366680  | 0.111592  | -1.445505 | P                   | 2.367334  | 0.117776  | -1.446258 |
| C                  | 0.232516  | -0.932046 | -0.142881 | C                   | 0.234553  | -0.928812 | -0.143390 |
| C                  | -0.465711 | -1.901433 | 0.634876  | C                   | -0.460900 | -1.898141 | 0.637877  |
| C                  | -0.006388 | -3.229140 | 0.598283  | C                   | -0.001644 | -3.226498 | 0.598126  |
| C                  | 1.144939  | -3.595547 | -0.094894 | C                   | 1.148183  | -3.592058 | -0.098100 |
| C                  | 1.912873  | -2.627349 | -0.733993 | C                   | 1.915518  | -2.622975 | -0.737583 |
| H                  | -0.538095 | -3.988391 | 1.155545  | H                   | -0.531310 | -3.986277 | 1.156500  |

|       |           |           |           |       |           |           |           |
|-------|-----------|-----------|-----------|-------|-----------|-----------|-----------|
| H     | 1.464332  | -4.631887 | -0.089584 | H     | 1.468123  | -4.628245 | -0.093351 |
| H     | 2.845090  | -2.892570 | -1.219781 | H     | 2.847927  | -2.887536 | -1.223469 |
| C     | 3.696534  | 0.331286  | 1.093390  | C     | 3.688351  | 0.368364  | 1.092769  |
| H     | 6.962708  | 0.751664  | 1.936576  | H     | 6.957688  | 0.746004  | 1.944595  |
| H     | 4.720662  | 0.505415  | 2.973543  | H     | 4.706167  | 0.562760  | 2.974444  |
| H     | 2.721747  | 0.222759  | 1.555670  | H     | 2.709491  | 0.288081  | 1.552305  |
| N     | -1.571224 | -1.543774 | 1.431913  | N     | -1.561979 | -1.541185 | 1.438768  |
| C     | -2.474394 | -2.603925 | 1.858819  | C     | -2.459708 | -2.602027 | 1.876751  |
| H     | -3.383071 | -2.144833 | 2.254157  | H     | -3.366100 | -2.143098 | 2.277152  |
| H     | -2.752011 | -3.230950 | 1.010742  | H     | -2.742638 | -3.233200 | 1.033534  |
| H     | -2.052014 | -3.245165 | 2.649160  | H     | -2.029430 | -3.238397 | 2.666377  |
| C     | -1.303999 | -0.592250 | 2.514135  | C     | -1.295726 | -0.579803 | 2.513196  |
| H     | -2.241138 | -0.132412 | 2.836543  | H     | -2.232908 | -0.116573 | 2.830228  |
| H     | -0.846497 | -1.093458 | 3.381847  | H     | -0.840667 | -1.074831 | 3.385370  |
| H     | -0.633406 | 0.197102  | 2.183620  | H     | -0.623106 | 0.205536  | 2.177666  |
| C     | -2.145483 | -1.082820 | -1.954425 | C     | -2.144881 | -1.089993 | -1.952442 |
| N     | -1.551417 | -1.598303 | -2.803038 | N     | -1.549596 | -1.602216 | -2.802500 |
| ***** |           |           |           | ***** |           |           |           |

|                         |           |           |           |                    |           |           |           |
|-------------------------|-----------|-----------|-----------|--------------------|-----------|-----------|-----------|
| 1-D-13-A-1P234-N-HEXANE |           |           |           | 3-D-13-A-1P234-vac |           |           |           |
| C                       | -5.315481 | -0.249708 | -0.258919 | C                  | 5.447360  | 1.375586  | 0.505139  |
| C                       | -4.325429 | -0.910241 | -0.992563 | C                  | 4.439511  | 1.779488  | -0.375347 |
| H                       | -4.574350 | -1.782438 | -1.584235 | H                  | 4.525016  | 2.715289  | -0.913683 |
| C                       | -5.006302 | 0.940070  | 0.366493  | C                  | 5.393658  | 0.109845  | 1.052379  |
| H                       | -5.781372 | 1.514238  | 0.862966  | H                  | 6.215524  | -0.259393 | 1.656704  |
| C                       | -3.015078 | -0.434618 | -1.010315 | C                  | 3.333862  | 0.963803  | -0.615872 |
| C                       | -3.696741 | 1.466476  | 0.332529  | C                  | 4.303489  | -0.750029 | 0.803001  |
| C                       | -2.635029 | 0.721112  | -0.262783 | C                  | 3.175035  | -0.283684 | 0.062645  |
| C                       | -3.451849 | 2.799056  | 0.801856  | C                  | 4.368831  | -2.128317 | 1.193455  |
| H                       | -4.270257 | 3.347483  | 1.254925  | H                  | 5.235287  | -2.467898 | 1.750184  |
| C                       | -2.254059 | 3.392879  | 0.575890  | C                  | 3.419502  | -3.003601 | 0.778497  |
| H                       | -2.099103 | 4.438065  | 0.820971  | H                  | 3.523727  | -4.065074 | 0.976451  |
| C                       | -1.147424 | 2.653893  | 0.040928  | C                  | 2.227833  | -2.553805 | 0.118804  |
| C                       | -1.280330 | 1.247068  | -0.190709 | C                  | 2.014275  | -1.152204 | -0.069139 |
| C                       | 0.070384  | 3.312858  | -0.228998 | C                  | 1.251446  | -3.485531 | -0.292948 |
| H                       | 0.134445  | 4.383229  | -0.066904 | H                  | 1.452627  | -4.544122 | -0.170119 |
| C                       | 1.141907  | 2.610182  | -0.738672 | C                  | 0.066205  | -3.055215 | -0.854489 |
| H                       | 2.043724  | 3.126504  | -1.048427 | H                  | -0.655067 | -3.772370 | -1.230806 |
| C                       | 1.081578  | 1.212785  | -0.772526 | C                  | -0.236748 | -1.689974 | -0.838476 |
| C                       | -0.067392 | 0.501512  | -0.365340 | C                  | 0.678839  | -0.731817 | -0.360696 |
| C                       | 1.465085  | -1.315959 | -0.721492 | C                  | -1.298097 | 0.629994  | -0.581391 |
| H                       | -6.325954 | -0.639891 | -0.238793 | H                  | 6.291789  | 2.026419  | 0.697535  |
| C                       | 3.816158  | 0.301028  | -0.305410 | C                  | -3.088898 | -1.616344 | -0.291760 |
| C                       | 4.839349  | 0.421381  | 1.889164  | C                  | -3.970074 | -2.173690 | 1.896684  |
| C                       | 5.072021  | 0.514863  | -0.884290 | C                  | -4.241388 | -2.155369 | -0.873715 |
| C                       | 6.089054  | 0.634984  | 1.302132  | C                  | -5.116576 | -2.710648 | 1.306259  |
| C                       | 6.204544  | 0.681183  | -0.084308 | C                  | -5.251566 | -2.700967 | -0.078859 |
| H                       | 5.165196  | 0.550813  | -1.964536 | H                  | -4.349063 | -2.147582 | -1.953310 |
| H                       | 7.171772  | 0.845558  | -0.546067 | H                  | -6.139419 | -3.115552 | -0.543452 |
| P                       | 2.365217  | 0.102689  | -1.446982 | P                  | -1.793425 | -0.919880 | -1.425916 |
| C                       | 0.230444  | -0.938252 | -0.143601 | C                  | 0.029541  | 0.567961  | -0.108190 |
| C                       | -0.470164 | -1.909282 | 0.627622  | C                  | 0.491786  | 1.659634  | 0.638613  |
| C                       | -0.006903 | -3.234218 | 0.599337  | C                  | -0.305459 | 2.772702  | 0.852595  |
| C                       | 1.146508  | -3.600292 | -0.089962 | C                  | -1.617583 | 2.859891  | 0.327930  |
| C                       | 1.912077  | -2.632608 | -0.730097 | C                  | -2.095539 | 1.751223  | -0.402321 |

|       |           |           |           |       |           |           |           |
|-------|-----------|-----------|-----------|-------|-----------|-----------|-----------|
| H     | -0.539951 | -3.992927 | 1.156322  | H     | 0.101343  | 3.586562  | 1.436077  |
| H     | 1.467399  | -4.636118 | -0.083115 | H     | -3.098190 | 1.753553  | -0.807591 |
| H     | 2.843677  | -2.897206 | -1.217217 | C     | -2.963706 | -1.630420 | 1.104620  |
| C     | 3.711182  | 0.255165  | 1.091918  | H     | -5.899283 | -3.133326 | 1.926479  |
| H     | 6.966648  | 0.763393  | 1.925905  | H     | -3.862449 | -2.179478 | 2.975952  |
| H     | 4.746763  | 0.383660  | 2.969101  | H     | -2.078022 | -1.213378 | 1.570587  |
| H     | 2.745941  | 0.086115  | 1.555781  | H     | 1.482209  | 1.651276  | 1.074322  |
| N     | -1.586564 | -1.552772 | 1.415469  | N     | -2.410028 | 3.976477  | 0.548898  |
| C     | -2.499358 | -2.612499 | 1.817686  | C     | -3.654398 | 4.122493  | -0.190965 |
| H     | -3.415523 | -2.154679 | 2.197956  | H     | -4.149720 | 5.039517  | 0.125596  |
| H     | -2.761001 | -3.233023 | 0.959743  | H     | -3.496960 | 4.171248  | -1.278120 |
| H     | -2.094866 | -3.261503 | 2.612123  | H     | -4.335394 | 3.293056  | 0.018786  |
| C     | -1.322894 | -0.619734 | 2.512765  | C     | -1.811173 | 5.180311  | 1.104435  |
| H     | -2.261368 | -0.165333 | 2.840028  | H     | -1.022273 | 5.597192  | 0.461587  |
| H     | -0.865476 | -1.132111 | 3.374816  | H     | -2.585946 | 5.935733  | 1.229423  |
| H     | -0.654024 | 1.076461  | 2.194635  | H     | -1.381398 | 4.986714  | 2.091077  |
| C     | -2.146036 | -1.074118 | -1.951355 | C     | 2.477609  | 1.373412  | -1.688375 |
| N     | -1.550510 | -1.600146 | -2.791633 | N     | 1.884538  | 1.736586  | -2.611755 |
| ***** |           |           |           | ***** |           |           |           |

|                     |           |           |           |                    |           |           |           |
|---------------------|-----------|-----------|-----------|--------------------|-----------|-----------|-----------|
| 3-D-13-A-1P234-CCl4 |           |           |           | 3-D-13-A-1P234-DCM |           |           |           |
| C                   | 5.444564  | 1.382982  | 0.512972  | C                  | -5.442924 | 1.390973  | -0.517322 |
| C                   | 4.439885  | 1.784923  | -0.372124 | C                  | -4.440720 | 1.790870  | 0.371493  |
| H                   | 4.527245  | 2.720910  | -0.909737 | H                  | -4.529253 | 2.727143  | 0.908290  |
| C                   | 5.391025  | 0.116626  | 1.059584  | C                  | -5.390000 | 0.124386  | -1.064112 |
| H                   | 6.211283  | -0.250872 | 1.666879  | H                  | -6.209049 | -0.240767 | -1.674126 |
| C                   | 3.336649  | 0.966228  | -0.615271 | C                  | -3.339552 | 0.969228  | 0.615926  |
| C                   | 4.303166  | -0.745649 | 0.806423  | C                  | -4.304099 | -0.740366 | -0.808604 |
| C                   | 3.176322  | -0.281518 | 0.062672  | C                  | -3.178503 | -0.278772 | -0.061996 |
| C                   | 4.369946  | -2.123870 | 1.197784  | C                  | -4.372447 | -2.118210 | -1.201971 |
| H                   | 5.235429  | -2.461636 | 1.756881  | H                  | -5.237067 | -2.453643 | -1.763467 |
| C                   | 3.422677  | -3.000895 | 0.780821  | C                  | -3.427088 | -2.997440 | -0.784363 |
| H                   | 3.527924  | -4.062083 | 0.979094  | H                  | -3.533474 | -4.058150 | -0.983842 |
| C                   | 2.231425  | -2.552204 | 0.118773  | C                  | -2.235949 | -2.550251 | -0.120249 |
| C                   | 2.016692  | -1.150776 | -0.071017 | C                  | -2.019985 | -1.149131 | 0.072447  |
| C                   | 1.256326  | -3.485474 | -0.293636 | C                  | -1.262047 | -3.485521 | 0.292056  |
| H                   | 1.458411  | -4.543746 | -0.170305 | H                  | -1.465270 | -4.543298 | 0.167422  |
| C                   | 0.070565  | -3.056387 | -0.855969 | C                  | -0.075599 | -3.058442 | 0.855236  |
| H                   | -0.649388 | -3.774967 | -1.232014 | H                  | 0.642907  | -3.778936 | 1.230321  |
| C                   | -0.233807 | -1.691101 | -0.840665 | C                  | 0.230487  | -1.692992 | 0.841340  |
| C                   | 0.680893  | -0.731150 | -0.364014 | C                  | -0.683374 | -0.730962 | 0.366545  |
| C                   | -1.298125 | 0.629230  | -0.584486 | C                  | 1.297776  | 0.628129  | 0.588040  |
| H                   | 6.286723  | 2.035456  | 0.708718  | H                  | -6.282851 | 2.045150  | -0.715808 |
| C                   | -3.089168 | -1.619790 | -0.292381 | C                  | 3.090132  | -1.623457 | 0.293461  |
| C                   | -3.961980 | -2.193003 | 1.895832  | C                  | 3.954728  | -2.213898 | -1.893906 |
| C                   | -4.252744 | -2.136360 | -0.873171 | C                  | 4.265163  | -2.115329 | 0.873074  |
| C                   | -5.120201 | -2.706779 | 1.306791  | C                  | 5.125065  | -2.702274 | -1.306340 |
| C                   | -5.264856 | -2.677939 | -0.077495 | C                  | 5.279454  | -2.652519 | 0.076711  |
| H                   | -4.368571 | -2.115012 | -1.951660 | H                  | 4.389435  | -2.078951 | 1.950108  |
| H                   | -6.161378 | -3.074705 | -0.540826 | H                  | 6.184939  | -3.029845 | 0.538582  |
| P                   | -1.792924 | -0.923668 | -1.424622 | P                  | 1.792071  | -0.928710 | 1.422384  |
| C                   | 0.030993  | 0.568810  | -0.113223 | C                  | -0.032521 | 0.569336  | 0.118088  |
| C                   | 0.492557  | 1.663021  | 0.631391  | C                  | -0.493589 | 1.666249  | -0.624245 |
| C                   | -0.305894 | 2.775411  | 0.845835  | C                  | 0.305658  | 2.778430  | -0.838041 |
| C                   | -1.620737 | 2.860339  | 0.324322  | C                  | 1.622953  | 2.861528  | -0.318483 |

|       |           |           |           |       |           |           |           |
|-------|-----------|-----------|-----------|-------|-----------|-----------|-----------|
| C     | -2.097754 | 1.748881  | -0.405124 | C     | 2.099281  | 1.747158  | 0.410081  |
| H     | 0.100581  | 3.590374  | 1.427981  | H     | -0.100055 | 3.594040  | -1.419791 |
| H     | -3.101531 | 1.749488  | -0.807563 | H     | 3.104335  | 1.745709  | 0.809488  |
| C     | -2.953912 | -1.653161 | 1.102982  | C     | 2.944491  | -1.678056 | -1.100464 |
| H     | -5.904178 | -3.126533 | 1.927279  | H     | 5.910541  | -3.118837 | -1.926899 |
| H     | -3.846618 | -2.213890 | 2.974041  | H     | 3.831645  | -2.251483 | -2.970706 |
| H     | -2.059537 | -1.254686 | 1.568671  | H     | 2.040787  | -1.300430 | -1.565703 |
| H     | 1.483377  | 1.657374  | 1.066341  | H     | -1.484454 | 1.663022  | -1.059084 |
| N     | -2.413707 | 3.972449  | 0.547023  | N     | 2.415394  | 3.969928  | -0.541449 |
| C     | -3.666468 | 4.113843  | -0.182106 | C     | 3.679321  | 4.104824  | 0.171531  |
| H     | -4.161113 | 5.029323  | 0.138580  | H     | 4.171297  | 5.020435  | -0.151350 |
| H     | -3.517051 | 4.163229  | -1.269850 | H     | 3.542650  | 4.150717  | 1.260647  |
| H     | -4.342620 | 3.282008  | 0.033208  | H     | 4.350358  | 3.271708  | -0.054542 |
| C     | -1.821097 | 5.176311  | 1.112833  | C     | 1.831353  | 5.170911  | -1.125458 |
| H     | -1.033285 | 5.599323  | 0.473568  | H     | 1.039325  | 5.600439  | -0.496820 |
| H     | -2.599521 | 5.927120  | 1.239375  | H     | 2.612844  | 5.918248  | -1.249774 |
| H     | -1.392671 | 4.978397  | 2.099037  | H     | 1.411202  | 4.965250  | -2.113539 |
| C     | 2.487428  | 1.370195  | -1.694763 | C     | -2.495118 | 1.366946  | 1.700280  |
| N     | 1.901440  | 1.726934  | -2.625564 | N     | -1.910526 | 1.715080  | 2.635777  |
| ***** |           |           |           | ***** |           |           |           |

| 3-D-13-A-1P234-DMSO |           |           |           | 3-D-13-A-1P234-N-HEXANE |           |           |           |
|---------------------|-----------|-----------|-----------|-------------------------|-----------|-----------|-----------|
| C                   | 5.442552  | 1.395380  | 0.516090  | C                       | 5.444914  | 1.381926  | 0.511799  |
| C                   | 4.441103  | 1.793365  | -0.374415 | C                       | 4.439704  | 1.784139  | -0.372560 |
| H                   | 4.529803  | 2.729148  | -0.911986 | H                       | 4.526735  | 2.720069  | -0.910346 |
| C                   | 5.390244  | 0.129367  | 1.064525  | C                       | 5.391364  | 0.115677  | 1.058517  |
| H                   | 6.209051  | -0.233844 | 1.675897  | H                       | 6.211896  | -0.252112 | 1.665321  |
| C                   | 3.340840  | 0.970116  | -0.618089 | C                       | 3.336097  | 0.965928  | -0.615324 |
| C                   | 4.305155  | -0.736839 | 0.809475  | C                       | 4.303156  | -0.746218 | 0.805956  |
| C                   | 3.179916  | -0.277177 | 0.061486  | C                       | 3.176037  | -0.281750 | 0.062732  |
| C                   | 4.374152  | -2.114099 | 1.205190  | C                       | 4.369715  | -2.124448 | 1.197148  |
| H                   | 5.238349  | -2.447961 | 1.768112  | H                       | 5.235353  | -2.462509 | 1.755878  |
| C                   | 3.429605  | -2.994775 | 0.788360  | C                       | 3.422146  | -3.001195 | 0.780465  |
| H                   | 3.536543  | -4.055051 | 0.989541  | H                       | 3.527243  | -4.062430 | 0.978693  |
| C                   | 2.238416  | -2.548983 | 0.123077  | C                       | 2.230852  | -2.552381 | 0.118737  |
| C                   | 2.021907  | -1.148194 | -0.072035 | C                       | 2.016261  | -1.150932 | -0.070710 |
| C                   | 1.264945  | -3.485402 | -0.288384 | C                       | 1.255602  | -3.485411 | -0.293618 |
| H                   | 1.468588  | -4.542864 | -0.162269 | H                       | 1.457561  | -4.543737 | -0.170376 |
| C                   | 0.078203  | -3.059659 | -0.852264 | C                       | 0.069950  | -3.056142 | -0.855879 |
| H                   | -0.639720 | -3.781264 | -1.226300 | H                       | -0.650190 | -3.774487 | -1.232031 |
| C                   | -0.228677 | -1.694108 | -0.839933 | C                       | -0.234236 | -1.690893 | -0.840454 |
| C                   | 0.684875  | -0.730935 | -0.366511 | C                       | 0.680540  | -0.731221 | -0.363527 |
| C                   | -1.297128 | 0.627505  | -0.589036 | C                       | -1.298148 | 0.629301  | -0.584127 |
| H                   | 6.281501  | 2.050588  | 0.714837  | H                       | 6.287449  | 2.034144  | 0.706975  |
| C                   | -3.090869 | -1.624892 | -0.294521 | C                       | -3.088901 | -1.619268 | -0.292297 |
| C                   | -3.952816 | -2.224881 | 1.891410  | C                       | -3.962917 | -2.189690 | 1.896070  |
| C                   | -4.271481 | -2.103230 | -0.874257 | C                       | -4.250605 | -2.139838 | -0.873166 |
| C                   | -5.129014 | -2.699404 | 1.303892  | C                       | -5.119168 | -2.707560 | 1.306907  |
| C                   | -5.287481 | -2.638128 | -0.078388 | C                       | -5.262300 | -2.682109 | -0.077526 |
| H                   | -4.399213 | -2.058427 | -1.950519 | H                       | -4.365102 | -2.120903 | -1.951859 |
| H                   | -6.197331 | -3.004897 | -0.540060 | H                       | -6.157368 | -3.082029 | -0.540996 |
| P                   | -1.790948 | -0.931223 | -1.420767 | P                       | -1.792937 | -0.923054 | -1.425103 |
| C                   | 0.033592  | 0.569565  | -0.119520 | C                       | 0.030664  | 0.568647  | -0.112409 |
| C                   | 0.494604  | 1.667882  | 0.621452  | C                       | 0.492194  | 1.662340  | 0.632774  |
| C                   | -0.304913 | 2.780063  | 0.834513  | C                       | -0.306142 | 2.774770  | 0.847146  |

|       |           |           |           |       |           |           |           |
|-------|-----------|-----------|-----------|-------|-----------|-----------|-----------|
| C     | -1.623293 | 2.862261  | 0.315695  | C     | -1.620419 | 2.860081  | 0.324884  |
| C     | -2.099333 | 1.746570  | -0.412389 | C     | -2.097477 | 1.749144  | -0.404782 |
| H     | 0.100512  | 3.596060  | 1.415912  | H     | 0.100242  | 3.589514  | 1.429661  |
| H     | -3.105101 | 1.743857  | -0.810110 | H     | -3.100987 | 1.750043  | -0.807881 |
| C     | -2.940838 | -1.691119 | 1.098541  | C     | -2.955247 | -1.649233 | 1.103250  |
| H     | -5.915733 | -3.114370 | 1.923859  | H     | -5.902850 | -3.127841 | 1.927437  |
| H     | -3.826515 | -2.271710 | 2.967427  | H     | -3.848768 | -2.207897 | 2.974472  |
| H     | -2.032504 | -1.324858 | 1.563958  | H     | -2.062347 | -1.247438 | 1.568895  |
| H     | 1.485484  | 1.665784  | 1.056207  | H     | 1.482896  | 1.656186  | 1.067968  |
| N     | -2.415370 | 3.969184  | 0.538014  | N     | -2.413342 | 3.972996  | 0.547191  |
| C     | -3.684499 | 4.100408  | -0.167022 | C     | -3.664809 | 4.115057  | -0.183559 |
| H     | -4.173293 | 5.018505  | 0.152915  | H     | -4.159739 | 5.030656  | 0.136586  |
| H     | -3.554320 | 4.139603  | -1.256996 | H     | -3.514174 | 4.164500  | -1.271212 |
| H     | -4.354710 | 3.268945  | 0.067867  | H     | -4.341603 | 3.283471  | 0.030800  |
| C     | -1.837246 | 5.167137  | 1.135078  | C     | -1.819804 | 5.176783  | 1.111505  |
| H     | -1.042601 | 5.602442  | 0.514152  | H     | -1.031394 | 5.598580  | 0.472031  |
| H     | -2.620897 | 5.911868  | 1.259807  | H     | -2.597535 | 5.928530  | 1.237320  |
| H     | -1.422180 | 4.954838  | 2.123869  | H     | -1.391721 | 4.979629  | 2.098051  |
| C     | 2.497725  | 1.363077  | -1.704614 | C     | 2.485757  | 1.370871  | -1.693759 |
| N     | 1.912089  | 1.704634  | -2.642167 | N     | 1.899027  | 1.728953  | -2.623478 |
| ***** |           |           |           | ***** |           |           |           |

| 2-D-10-A-12P34-vacuum |           |           |           | 2-D-10-A-12P34-CCl4 |           |           |           |
|-----------------------|-----------|-----------|-----------|---------------------|-----------|-----------|-----------|
| C                     | -2.834334 | -2.529415 | 0.403321  | C                   | -2.828256 | -2.538643 | 0.404635  |
| C                     | -2.560473 | -3.813090 | -0.160820 | C                   | -2.549014 | -3.821674 | -0.160771 |
| H                     | -3.243924 | -4.635791 | -0.005969 | H                   | -3.229142 | -4.647032 | -0.005772 |
| C                     | -1.924590 | -1.500945 | 0.154938  | C                   | -1.920851 | -1.506210 | 0.157051  |
| H                     | -2.086230 | -0.535834 | 0.604110  | H                   | -2.087266 | -0.542365 | 0.607292  |
| C                     | -1.410200 | -4.031979 | -0.869973 | C                   | -1.397916 | -4.035939 | -0.870032 |
| H                     | -1.199236 | -5.027031 | -1.248204 | H                   | -1.183017 | -5.029999 | -1.248598 |
| C                     | -3.389713 | 2.127255  | -1.014964 | C                   | -3.396581 | 2.117530  | -1.013065 |
| C                     | -2.307016 | 1.278052  | -1.065999 | C                   | -2.310006 | 1.272960  | -1.063666 |
| C                     | -3.261645 | 3.411160  | -0.458611 | C                   | -3.272964 | 3.402284  | -0.458446 |
| H                     | -4.117885 | 4.071162  | -0.393905 | H                   | -4.132447 | 4.057899  | -0.393587 |
| C                     | -2.022601 | 3.852663  | -0.028368 | C                   | -2.034202 | 3.847909  | -0.029850 |
| C                     | -0.863267 | 3.015378  | -0.123115 | C                   | -0.870769 | 3.015696  | -0.123370 |
| C                     | -1.031697 | 1.662404  | -0.574693 | C                   | -1.035613 | 1.661644  | -0.573420 |
| C                     | 0.435345  | 3.521567  | 0.135266  | C                   | 0.426361  | 3.525815  | 0.134125  |
| H                     | 0.548266  | 4.540293  | 0.486058  | H                   | 0.539046  | 4.545018  | 0.483471  |
| C                     | 1.539026  | 2.756048  | -0.152817 | C                   | 1.532508  | 2.762823  | -0.152868 |
| H                     | 2.532068  | 3.183536  | -0.066544 | H                   | 2.524087  | 3.193569  | -0.066752 |
| C                     | 1.386268  | 1.414114  | -0.549258 | C                   | 1.383062  | 1.420110  | -0.548000 |
| C                     | 0.125798  | 0.808883  | -0.630213 | C                   | 0.124211  | 0.810970  | -0.628514 |
| C                     | 1.483462  | -1.025485 | -1.327989 | C                   | 1.486685  | -1.019884 | -1.326176 |
| C                     | 3.783089  | -0.126527 | 0.142639  | C                   | 3.786098  | -0.114547 | 0.143936  |
| C                     | 4.168816  | -0.897400 | 2.406804  | C                   | 4.174801  | -0.862386 | 2.415796  |
| C                     | 5.166309  | -0.035835 | -0.046107 | C                   | 5.169442  | -0.048861 | -0.055746 |
| C                     | 5.548461  | -0.805252 | 2.209546  | C                   | 5.554681  | -0.796129 | 2.207613  |
| C                     | 6.046362  | -0.375163 | 0.983171  | C                   | 6.051067  | -0.390192 | 0.971938  |
| H                     | 5.556211  | 0.302117  | -1.000358 | H                   | 5.559167  | 0.270881  | -1.016259 |
| H                     | 7.116420  | -0.300887 | 0.824474  | H                   | 7.120993  | -0.335843 | 0.804839  |
| P                     | 2.685557  | 0.354871  | -1.274352 | P                   | 2.685296  | 0.363571  | -1.270984 |
| C                     | 0.209584  | -0.648783 | -0.889187 | C                   | 0.211607  | -0.646710 | -0.886844 |
| C                     | -0.760511 | -1.685173 | -0.629907 | C                   | -0.755974 | -1.686098 | -0.627231 |
| C                     | -0.457014 | -3.007542 | -1.096209 | C                   | -0.447969 | -3.007420 | -1.095316 |

|       |           |           |           |       |           |           |           |
|-------|-----------|-----------|-----------|-------|-----------|-----------|-----------|
| C     | 0.799167  | -3.296914 | -1.682900 | C     | 0.809044  | -3.293143 | -1.682004 |
| C     | 1.777442  | -2.335328 | -1.753549 | C     | 1.785212  | -2.328551 | -1.752466 |
| H     | 0.994966  | -4.307957 | -2.024995 | H     | 1.007536  | -4.303544 | -2.024346 |
| H     | 2.763743  | -2.577197 | -2.133124 | H     | 2.772152  | -2.567715 | -2.132081 |
| C     | 3.291339  | -0.561492 | 1.380972  | C     | 3.295625  | -0.525191 | 1.391316  |
| H     | 6.229677  | -1.068022 | 3.011183  | H     | 6.237115  | -1.059888 | 3.007822  |
| H     | 3.778483  | -1.231874 | 3.361728  | H     | 3.785556  | -1.177720 | 3.377590  |
| H     | 2.221726  | -0.638307 | 1.540870  | H     | 2.226190  | -0.582171 | 1.560636  |
| H     | -2.422584 | 0.303210  | -1.517198 | H     | -2.423126 | 0.297313  | -1.513548 |
| N     | -3.978383 | -2.326867 | 1.165975  | N     | -3.971100 | -2.341144 | 1.165886  |
| C     | -4.710681 | -3.475983 | 1.682326  | C     | -4.709969 | -3.492788 | 1.671356  |
| H     | -4.107411 | -4.097209 | 2.360325  | H     | -4.111132 | -4.117540 | 2.349178  |
| H     | -5.581356 | -3.118967 | 2.231058  | H     | -5.582409 | -3.136297 | 2.216967  |
| H     | -5.077668 | -4.108840 | 0.871120  | H     | -5.072903 | -4.120031 | 0.854311  |
| C     | -4.125463 | -1.076609 | 1.896410  | C     | -4.124102 | -1.091927 | 1.898747  |
| H     | -5.104049 | -1.058525 | 2.374927  | H     | -5.100412 | -1.081688 | 2.381226  |
| H     | -3.357139 | -0.944565 | 2.673098  | H     | -3.353471 | -0.957404 | 2.672097  |
| H     | -4.074237 | -0.221873 | 1.218320  | H     | -4.081021 | -0.235778 | 1.221740  |
| C     | -1.900536 | 5.183779  | 0.480628  | C     | -1.918871 | 5.179961  | 0.476396  |
| N     | -1.809036 | 6.258967  | 0.896243  | N     | -1.835643 | 6.257166  | 0.889592  |
| H     | -4.345618 | 1.810477  | -1.415259 | H     | -4.351819 | 1.796158  | -1.410570 |
| ***** |           |           |           | ***** |           |           |           |

| 2-D-10-A-12P34-DCM |           |           |           | 2-D-10-A-12P34-DMSO |           |           |           |
|--------------------|-----------|-----------|-----------|---------------------|-----------|-----------|-----------|
| C                  | -2.815093 | -2.554351 | 0.406124  | C                   | -2.806685 | -2.563286 | 0.407058  |
| C                  | -2.526515 | -3.836491 | -0.159325 | C                   | -2.512991 | -3.844955 | -0.157810 |
| H                  | -3.201276 | -4.666185 | -0.004242 | H                   | -3.184741 | -4.677017 | -0.002381 |
| C                  | -1.912709 | -1.515553 | 0.159133  | C                   | -1.907427 | -1.521000 | 0.160005  |
| H                  | -2.086945 | -0.552905 | 0.609054  | H                   | -2.085998 | -0.558875 | 0.609369  |
| C                  | -1.373797 | -4.043520 | -0.868068 | C                   | -1.359423 | -4.048100 | -0.866281 |
| H                  | -1.152419 | -5.036199 | -1.246399 | H                   | -1.134445 | -5.040094 | -1.244215 |
| C                  | -3.408983 | 2.099822  | -1.009517 | C                   | -3.415966 | 2.089406  | -1.007386 |
| C                  | -2.316644 | 1.262553  | -1.060537 | C                   | -2.320586 | 1.256133  | -1.059168 |
| C                  | -3.292689 | 3.385839  | -0.456855 | C                   | -3.303602 | 3.376095  | -0.455667 |
| H                  | -4.157045 | 4.034698  | -0.391060 | H                   | -4.170496 | 4.021353  | -0.388901 |
| C                  | -2.055196 | 3.838999  | -0.031104 | C                   | -2.066912 | 3.833645  | -0.031855 |
| C                  | -0.885865 | 3.014485  | -0.124213 | C                   | -0.894543 | 3.013291  | -0.125449 |
| C                  | -1.043722 | 1.658974  | -0.572449 | C                   | -1.048383 | 1.657002  | -0.572710 |
| C                  | 0.408562  | 3.532209  | 0.131513  | C                   | 0.398358  | 3.535489  | 0.128864  |
| H                  | 0.517861  | 4.552403  | 0.479013  | H                   | 0.505208  | 4.556273  | 0.475390  |
| C                  | 1.519170  | 2.774732  | -0.154399 | C                   | 1.511417  | 2.781346  | -0.156829 |
| H                  | 2.508114  | 3.211491  | -0.069021 | H                   | 2.498869  | 3.221539  | -0.072170 |
| C                  | 1.376476  | 1.430550  | -0.547383 | C                   | 1.372697  | 1.436304  | -0.548467 |
| C                  | 0.120776  | 0.814309  | -0.627354 | C                   | 0.118863  | 0.815953  | -0.627795 |
| C                  | 1.493073  | -1.009745 | -1.324474 | C                   | 1.496971  | -1.004257 | -1.324146 |
| C                  | 3.788512  | -0.093487 | 0.145997  | C                   | 3.788742  | -0.081328 | 0.147311  |
| C                  | 4.180279  | -0.807709 | 2.428784  | C                   | 4.180890  | -0.772705 | 2.437362  |
| C                  | 5.171289  | -0.064877 | -0.067610 | C                   | 5.170794  | -0.076424 | -0.073345 |
| C                  | 5.559643  | -0.779881 | 2.206485  | C                   | 5.559482  | -0.769352 | 2.207866  |
| C                  | 6.054070  | -0.409329 | 0.958449  | C                   | 6.053279  | -0.422134 | 0.952687  |
| H                  | 5.560587  | 0.227850  | -1.036774 | H                   | 5.560104  | 0.198538  | -1.047648 |
| H                  | 7.123268  | -0.384472 | 0.780558  | H                   | 7.121782  | -0.416045 | 0.769295  |
| P                  | 2.684650  | 0.380084  | -1.267509 | P                   | 2.684454  | 0.389359  | -1.266705 |
| C                  | 0.215776  | -0.643366 | -0.884671 | C                   | 0.218441  | -0.641752 | -0.884209 |
| C                  | -0.746289 | -1.688471 | -0.624040 | C                   | -0.740265 | -1.690141 | -0.622663 |

|       |           |           |           |       |           |           |           |
|-------|-----------|-----------|-----------|-------|-----------|-----------|-----------|
| C     | -0.429876 | -3.008349 | -1.092912 | C     | -0.419058 | -3.009341 | -1.091344 |
| C     | 0.828732  | -3.287293 | -1.679400 | C     | 0.840446  | -3.284434 | -1.677695 |
| C     | 1.799901  | -2.316695 | -1.750660 | C     | 1.808518  | -2.310370 | -1.749779 |
| H     | 1.032851  | -4.296670 | -2.021373 | H     | 1.047903  | -4.293293 | -2.019172 |
| H     | 2.788024  | -2.550610 | -2.130532 | H     | 2.797330  | -2.541271 | -2.129737 |
| C     | 3.299723  | -0.468194 | 1.405624  | C     | 3.300465  | -0.432389 | 1.414078  |
| H     | 6.243009  | -1.045422 | 3.005206  | H     | 6.242688  | -1.035399 | 3.006506  |
| H     | 3.792611  | -1.094770 | 3.399958  | H     | 3.793780  | -1.041104 | 3.414054  |
| H     | 2.231004  | -0.494856 | 1.586985  | H     | 2.232446  | -0.439463 | 1.601530  |
| H     | -2.425496 | 0.285682  | -1.508576 | H     | -2.427124 | 0.278559  | -1.506124 |
| N     | -3.958034 | -2.364806 | 1.164260  | N     | -3.949705 | -2.377965 | 1.163948  |
| C     | -4.699378 | -3.520657 | 1.660587  | C     | -4.691161 | -3.536023 | 1.656330  |
| H     | -4.102816 | -4.145264 | 2.339646  | H     | -4.094867 | -4.160681 | 2.335250  |
| H     | -5.575089 | -3.167033 | 2.202043  | H     | -5.568090 | -3.184384 | 2.196804  |
| H     | -5.055174 | -4.145653 | 0.838990  | H     | -5.044129 | -4.160014 | 0.832808  |
| C     | -4.125598 | -1.114167 | 1.893373  | C     | -4.125950 | -1.125940 | 1.889324  |
| H     | -5.101204 | -1.114394 | 2.376539  | H     | -5.101725 | -1.131127 | 2.371801  |
| H     | -3.356024 | -0.970160 | 2.665443  | H     | -3.357865 | -0.975567 | 2.661435  |
| H     | -4.092439 | -0.259645 | 1.213735  | H     | -4.097473 | -0.273239 | 1.207230  |
| C     | -1.948275 | 5.172148  | 0.471938  | C     | -1.964128 | 5.167346  | 0.469745  |
| N     | -1.871973 | 6.251180  | 0.882605  | N     | -1.890856 | 6.247320  | 0.878837  |
| H     | -4.363214 | 1.771318  | -1.402845 | H     | -4.369741 | 1.756981  | -1.398231 |
| ***** |           |           |           | ***** |           |           |           |

|                         |           |           |           |                       |           |           |           |
|-------------------------|-----------|-----------|-----------|-----------------------|-----------|-----------|-----------|
| 2-D-10-A-12P34-N-HEXANE |           |           |           | 2-D-12-A-12P34-VACUUM |           |           |           |
| C                       | -2.829176 | -2.537084 | 0.404413  | C                     | -2.636687 | -2.324314 | 0.537681  |
| C                       | -2.550838 | -3.820213 | -0.160762 | C                     | -2.441864 | -3.543066 | -0.183168 |
| H                       | -3.231456 | -4.645162 | -0.005654 | H                     | -3.143247 | -4.358374 | -0.077737 |
| C                       | -1.921439 | -1.505321 | 0.156617  | C                     | -1.733987 | -1.282214 | 0.311245  |
| H                       | -2.086938 | -0.541252 | 0.606701  | H                     | -1.860209 | -0.355600 | 0.844968  |
| C                       | -1.399920 | -4.035251 | -0.870069 | C                     | -1.344975 | -3.710373 | -0.983711 |
| H                       | -1.185685 | -5.029496 | -1.248545 | H                     | -1.189393 | -4.661729 | -1.482109 |
| C                       | -3.395416 | 2.119079  | -1.013612 | C                     | -3.180061 | 2.490594  | -0.398537 |
| C                       | -2.309487 | 1.273731  | -1.064184 | C                     | -2.128291 | 1.614692  | -0.608511 |
| C                       | -3.271103 | 3.403691  | -0.458672 | C                     | -2.962943 | 3.739000  | 0.244449  |
| H                       | -4.130031 | 4.060076  | -0.393943 | H                     | -3.799518 | 4.403755  | 0.419554  |
| C                       | -2.032348 | 3.848612  | -0.029656 | C                     | -1.688527 | 4.097599  | 0.593965  |
| C                       | -0.869592 | 3.015579  | -0.123310 | H                     | -1.502181 | 5.069551  | 1.037687  |
| C                       | -1.034985 | 1.661714  | -0.573671 | C                     | -0.581247 | 3.241999  | 0.348013  |
| C                       | 0.427766  | 3.525034  | 0.134447  | C                     | -0.812021 | 1.930618  | -0.193572 |
| H                       | 0.540450  | 4.544127  | 0.484127  | C                     | 0.744204  | 3.701892  | 0.549906  |
| C                       | 1.533511  | 2.761642  | -0.152723 | H                     | 0.900648  | 4.689482  | 0.969591  |
| H                       | 2.525335  | 3.191829  | -0.066481 | C                     | 1.807514  | 2.942807  | 0.125548  |
| C                       | 1.383564  | 1.419090  | -0.548186 | H                     | 2.815470  | 3.340850  | 0.172486  |
| C                       | 0.124460  | 0.810584  | -0.628831 | C                     | 1.593472  | 1.639806  | -0.364075 |
| C                       | 1.486160  | -1.020799 | -1.326520 | C                     | 0.317247  | 1.061872  | -0.404143 |
| C                       | 3.785556  | -0.116473 | 0.143721  | C                     | 1.583857  | -0.726102 | -1.347220 |
| C                       | 4.173723  | -0.868180 | 2.414296  | C                     | 3.993595  | 0.007908  | 0.037171  |
| C                       | 5.168910  | -0.046429 | -0.054087 | C                     | 4.507132  | -0.975942 | 2.190833  |
| C                       | 5.553591  | -0.797413 | 2.207985  | C                     | 5.363879  | 0.115134  | -0.223562 |
| C                       | 6.050268  | -0.387349 | 0.973882  | C                     | 5.873381  | -0.865520 | 1.922347  |
| H                       | 5.558673  | 0.276480  | -1.013538 | C                     | 6.300915  | -0.320592 | 0.715215  |
| H                       | 7.120248  | -0.329523 | 0.808225  | H                     | 5.699021  | 0.540518  | -1.163565 |
| P                       | 2.685323  | 0.362159  | -1.271577 | H                     | 7.360236  | -0.232854 | 0.500944  |
| C                       | 0.211267  | -0.647061 | -0.887324 | P                     | 2.817426  | 0.623269  | -1.260402 |

|       |           |           |           |       |           |           |           |
|-------|-----------|-----------|-----------|-------|-----------|-----------|-----------|
| C     | -0.756730 | -1.685946 | -0.627825 | C     | 0.350654  | -0.369707 | -0.789049 |
| C     | -0.449468 | -3.007422 | -1.095595 | C     | -0.622928 | -1.410848 | -0.556092 |
| C     | 0.807405  | -3.293720 | -1.682302 | C     | -0.379315 | -2.688380 | -1.163833 |
| C     | 1.783917  | -2.329641 | -1.752738 | C     | 0.827796  | -2.942856 | -1.857958 |
| H     | 1.005445  | -4.304212 | -2.024652 | C     | 1.821494  | -1.995639 | -1.907050 |
| H     | 2.770761  | -2.569225 | -2.132333 | H     | 0.976405  | -3.920655 | -2.304520 |
| C     | 3.294840  | -0.531296 | 1.389568  | H     | 2.774917  | -2.217237 | -2.373038 |
| H     | 6.235823  | -1.060932 | 3.008459  | C     | 3.572917  | -0.543361 | 1.255250  |
| H     | 3.784259  | -1.186789 | 3.374932  | H     | 6.598925  | -1.204614 | 2.653344  |
| H     | 2.225346  | -0.591765 | 1.557251  | H     | 4.171471  | -1.401254 | 3.130289  |
| H     | -2.422942 | 0.298207  | -1.514286 | H     | 2.514096  | -0.636409 | 1.469160  |
| N     | -3.972229 | -2.338806 | 1.165940  | H     | -2.318342 | 0.684238  | -1.122200 |
| C     | -4.709597 | -3.490154 | 1.673537  | N     | -3.677798 | -2.208010 | 1.443581  |
| H     | -4.109714 | -4.114121 | 2.351310  | C     | -3.952230 | -0.917844 | 2.058252  |
| H     | -5.581716 | -3.133769 | 2.219849  | H     | -4.280895 | -0.162985 | 1.331129  |
| H     | -5.073279 | -4.118508 | 0.857625  | H     | -4.738371 | -1.040187 | 2.802175  |
| C     | -4.124164 | -1.089473 | 1.898492  | H     | -3.066838 | -0.537827 | 2.575030  |
| H     | -5.100765 | -1.078020 | 2.380496  | C     | -4.750044 | -3.194178 | 1.449119  |
| H     | -3.353800 | -0.955341 | 2.672278  | H     | -5.452285 | -2.944103 | 2.242983  |
| H     | -4.079893 | -0.233481 | 1.221376  | H     | -5.304026 | -3.223777 | 0.500554  |
| C     | -1.915999 | 5.180518  | 0.477152  | H     | -4.366432 | -4.196538 | 1.657139  |
| N     | -1.831673 | 6.257338  | 0.890910  | C     | -4.497181 | 2.138484  | -0.831379 |
| H     | -4.350708 | 1.798494  | -1.411751 | N     | -5.568684 | 1.857709  | -1.163673 |
| ***** |           |           |           | ***** |           |           |           |

|                     |           |           |           |                    |           |           |           |
|---------------------|-----------|-----------|-----------|--------------------|-----------|-----------|-----------|
| 2-D-12-A-12P34-CCI4 |           |           |           | 2-D-12-A-12P34-DCM |           |           |           |
| C                   | -2.656032 | -2.326043 | 0.455082  | C                  | -2.643645 | -2.337740 | 0.452322  |
| C                   | -2.438128 | -3.542923 | -0.263876 | C                  | -2.422361 | -3.549764 | -0.275415 |
| H                   | -3.126599 | -4.369301 | -0.159228 | H                  | -3.105261 | -4.380844 | -0.171917 |
| C                   | -1.742933 | -1.284461 | 0.266052  | C                  | -1.736089 | -1.290257 | 0.264519  |
| H                   | -1.863938 | -0.373993 | 0.828400  | H                  | -1.859007 | -0.383315 | 0.832221  |
| C                   | -1.336025 | -3.694029 | -1.060944 | C                  | -1.322536 | -3.691490 | -1.077829 |
| H                   | -1.165536 | -4.642659 | -1.559607 | H                  | -1.149237 | -4.636933 | -1.581441 |
| C                   | -3.201199 | 2.496604  | -0.396927 | C                  | -3.213901 | 2.487736  | -0.400516 |
| C                   | -2.146694 | 1.624446  | -0.611480 | C                  | -2.155610 | 1.619128  | -0.612376 |
| C                   | -2.995169 | 3.732113  | 0.275014  | C                  | -3.017822 | 3.722122  | 0.276906  |
| H                   | -3.834274 | 4.392294  | 0.454588  | H                  | -3.860003 | 4.378310  | 0.455883  |
| C                   | -1.725390 | 4.085367  | 0.646083  | C                  | -1.751161 | 4.079252  | 0.655314  |
| H                   | -1.546103 | 5.047877  | 1.112286  | H                  | -1.578428 | 5.040272  | 1.126558  |
| C                   | -0.613586 | 3.237629  | 0.391441  | C                  | -0.634590 | 3.237061  | 0.401267  |
| C                   | -0.835378 | 1.936230  | -0.177745 | C                  | -0.847933 | 1.936231  | -0.172726 |
| C                   | 0.708592  | 3.698993  | 0.612012  | C                  | 0.684818  | 3.704551  | 0.627221  |
| H                   | 0.858044  | 4.678423  | 1.052465  | H                  | 0.828265  | 4.682931  | 1.071574  |
| C                   | 1.778099  | 2.953252  | 0.178502  | C                  | 1.759456  | 2.965737  | 0.193412  |
| H                   | 2.783560  | 3.355474  | 0.239613  | H                  | 2.762214  | 3.373790  | 0.258496  |
| C                   | 1.572601  | 1.659220  | -0.338612 | C                  | 1.561835  | 1.672123  | -0.329109 |
| C                   | 0.299208  | 1.076596  | -0.397952 | C                  | 0.291583  | 1.083390  | -0.393540 |
| C                   | 1.578500  | -0.688149 | -1.368305 | C                  | 1.579370  | -0.670652 | -1.372461 |
| C                   | 3.980730  | 0.028486  | 0.040940  | C                  | 3.977979  | 0.045425  | 0.043146  |
| C                   | 4.490257  | -0.979163 | 2.185071  | C                  | 4.489895  | -0.933426 | 2.200642  |
| C                   | 5.351425  | 0.124289  | -0.223317 | C                  | 5.346800  | 0.094059  | -0.243968 |
| C                   | 5.857079  | -0.880912 | 1.912962  | C                  | 5.854877  | -0.884111 | 1.905178  |
| C                   | 6.286733  | -0.329873 | 0.708877  | C                  | 6.282254  | -0.371177 | 0.683050  |
| H                   | 5.689227  | 0.555020  | -1.159844 | H                  | 5.684062  | 0.496595  | -1.193044 |
| H                   | 7.346186  | -0.251127 | 0.492085  | H                  | 7.339982  | -0.329490 | 0.448655  |

|       |           |           |           |       |           |           |           |
|-------|-----------|-----------|-----------|-------|-----------|-----------|-----------|
| P     | 2.805874  | 0.664600  | -1.246976 | P     | 2.801200  | 0.687075  | -1.239411 |
| C     | 0.341025  | -0.346651 | -0.810379 | C     | 0.340376  | -0.337454 | -0.812825 |
| C     | -0.631194 | -1.394084 | -0.602678 | C     | -0.626812 | -1.390383 | -0.608712 |
| C     | -0.379591 | -2.660671 | -1.230354 | C     | -0.370645 | -2.652520 | -1.244110 |
| C     | 0.832820  | -2.898841 | -1.921696 | C     | 0.842382  | -2.882052 | -1.938015 |
| C     | 1.823513  | -1.946647 | -1.950056 | C     | 1.829692  | -1.925224 | -1.961297 |
| H     | 0.988112  | -3.868661 | -2.383095 | H     | 1.001558  | -3.848699 | -2.404628 |
| H     | 2.779853  | -2.156968 | -2.415286 | H     | 2.786707  | -2.129646 | -2.427854 |
| C     | 3.557659  | -0.528761 | 1.255749  | C     | 3.556859  | -0.473146 | 1.275948  |
| H     | 6.581255  | -1.233687 | 2.638744  | H     | 6.579214  | -1.244166 | 2.627094  |
| H     | 4.152975  | -1.408645 | 3.121985  | H     | 4.154459  | -1.331840 | 3.151760  |
| H     | 2.498747  | -0.612376 | 1.473257  | H     | 2.499708  | -0.517835 | 1.513017  |
| H     | -2.329494 | 0.703897  | -1.145435 | H     | -2.332287 | 0.699024  | -1.149033 |
| N     | -3.740954 | -2.200254 | 1.302958  | N     | -3.725675 | -2.222138 | 1.305245  |
| C     | -4.523454 | -3.374512 | 1.668417  | C     | -4.483598 | -3.409844 | 1.686696  |
| H     | -3.929989 | -4.128021 | 2.204600  | H     | -3.872957 | -4.143428 | 2.230584  |
| H     | -5.342215 | -3.062757 | 2.314618  | H     | -5.307251 | -3.106673 | 2.330516  |
| H     | -4.966114 | -3.846590 | 0.787732  | H     | -4.916888 | -3.900947 | 0.812649  |
| C     | -3.851351 | -1.024324 | 2.153241  | C     | -3.820360 | -1.062877 | 2.182463  |
| H     | -4.791678 | -1.068079 | 2.700007  | H     | -4.757780 | -1.111064 | 2.733502  |
| H     | -3.029757 | -0.952273 | 2.880618  | H     | -2.993983 | -1.014910 | 2.906051  |
| H     | -3.860610 | -0.109612 | 1.555473  | H     | -3.823886 | -0.135479 | 1.605189  |
| C     | -4.509899 | 2.160547  | -0.865129 | C     | -4.516124 | 2.148399  | -0.882081 |
| N     | -5.575200 | 1.900310  | -1.232859 | N     | -5.575346 | 1.884940  | -1.265717 |
| ***** |           |           |           | ***** |           |           |           |

|                     |           |           |           |                         |           |           |           |
|---------------------|-----------|-----------|-----------|-------------------------|-----------|-----------|-----------|
| 2-D-12-A-12P34-DMSO |           |           |           | 2-D-12-A-12P34-N-HEXANE |           |           |           |
| C                   | -2.638240 | -2.342602 | 0.451051  | C                       | -2.657560 | -2.324217 | 0.455365  |
| C                   | -2.414673 | -3.553107 | -0.278968 | C                       | -2.440035 | -3.541882 | -0.262123 |
| H                   | -3.095305 | -4.386099 | -0.176196 | H                       | -3.129325 | -4.367570 | -0.157369 |
| C                   | -1.732959 | -1.292646 | 0.263921  | C                       | -1.743600 | -1.283602 | 0.266328  |
| H                   | -1.857038 | -0.386924 | 0.833300  | H                       | -1.864273 | -0.372588 | 0.827848  |
| C                   | -1.315009 | -3.691439 | -1.082452 | C                       | -1.337462 | -3.694454 | -1.058154 |
| H                   | -1.139959 | -4.636002 | -1.587058 | H                       | -1.167278 | -4.643599 | -1.555952 |
| C                   | -3.219978 | 2.482320  | -0.402724 | C                       | -3.199610 | 2.497235  | -0.396506 |
| C                   | -2.159568 | 1.615979  | -0.613587 | C                       | -2.145420 | 1.624876  | -0.611478 |
| C                   | -3.028327 | 3.717069  | 0.275282  | C                       | -2.992158 | 3.733227  | 0.273992  |
| H                   | -3.872126 | 4.371114  | 0.454095  | H                       | -3.830960 | 4.393810  | 0.453636  |
| C                   | -1.762902 | 4.077104  | 0.655339  | C                       | -1.721910 | 4.086411  | 0.643457  |
| H                   | -1.593184 | 5.038104  | 1.127525  | H                       | -1.541769 | 5.049381  | 1.108464  |
| C                   | -0.644015 | 3.237594  | 0.402039  | C                       | -0.610669 | 3.238013  | 0.388927  |
| C                   | -0.853335 | 1.936367  | -0.172593 | C                       | -0.833530 | 1.936309  | -0.179060 |
| C                   | 0.674074  | 3.708381  | 0.629631  | C                       | 0.711857  | 3.698745  | 0.608479  |
| H                   | 0.814665  | 4.686769  | 1.074704  | H                       | 0.862054  | 4.678504  | 1.048017  |
| C                   | 1.751099  | 2.972358  | 0.196705  | C                       | 1.780706  | 2.951969  | 0.175370  |
| H                   | 2.752607  | 3.383113  | 0.263237  | H                       | 2.786526  | 3.353435  | 0.235803  |
| C                   | 1.557240  | 1.678270  | -0.326653 | C                       | 1.574236  | 1.657651  | -0.340460 |
| C                   | 0.288514  | 1.086553  | -0.392829 | C                       | 0.300457  | 1.075778  | -0.398909 |
| C                   | 1.580799  | -0.663778 | -1.372793 | C                       | 1.578783  | -0.690653 | -1.367472 |
| C                   | 3.976953  | 0.054360  | 0.045129  | C                       | 3.981047  | 0.026446  | 0.041047  |
| C                   | 4.490884  | -0.898141 | 2.214163  | C                       | 4.489833  | -0.982499 | 2.184639  |
| C                   | 5.343452  | 0.069169  | -0.256902 | C                       | 5.351877  | 0.125916  | -0.220914 |
| C                   | 5.853422  | -0.883650 | 1.903524  | C                       | 5.856764  | -0.880419 | 1.914850  |
| C                   | 6.278555  | -0.400877 | 0.668172  | C                       | 6.286875  | -0.326878 | 0.712169  |
| H                   | 5.679562  | 0.449082  | -1.215621 | H                       | 5.689839  | 0.558477  | -1.156557 |

|       |           |           |           |       |           |           |           |
|-------|-----------|-----------|-----------|-------|-----------|-----------|-----------|
| H     | 7.334345  | -0.385644 | 0.422267  | H     | 7.346477  | -0.245239 | 0.497119  |
| P     | 2.799741  | 0.696856  | -1.236264 | P     | 2.806826  | 0.661564  | -1.248100 |
| C     | 0.340845  | -0.333822 | -0.813413 | C     | 0.341462  | -0.347952 | -0.809924 |
| C     | -0.624089 | -1.389239 | -0.610328 | C     | -0.631372 | -1.394647 | -0.601618 |
| C     | -0.365222 | -2.650082 | -1.247584 | C     | -0.380344 | -2.661934 | -1.227984 |
| C     | 0.848600  | -2.876350 | -1.941549 | C     | 0.832049  | -2.901395 | -1.918771 |
| C     | 1.834112  | -1.917297 | -1.963146 | C     | 1.823153  | -1.949807 | -1.947906 |
| H     | 1.009933  | -3.842113 | -2.409220 | H     | 0.986911  | -3.871723 | -2.379260 |
| H     | 2.791698  | -2.119420 | -2.429556 | H     | 2.779438  | -2.161023 | -2.412837 |
| C     | 3.557930  | -0.433700 | 1.291148  | C     | 3.557569  | -0.533351 | 1.254484  |
| H     | 6.577603  | -1.246592 | 2.624092  | H     | 6.580706  | -1.232276 | 2.641328  |
| H     | 4.157271  | -1.272106 | 3.175763  | H     | 4.152188  | -1.414048 | 3.120485  |
| H     | 2.502822  | -0.450445 | 1.540828  | H     | 2.498501  | -0.619980 | 1.470001  |
| H     | -2.333492 | 0.695425  | -1.150268 | H     | -2.329047 | 0.704016  | -1.144619 |
| N     | -3.720609 | -2.230679 | 1.304349  | N     | -3.743187 | -2.196804 | 1.302272  |
| C     | -4.465406 | -3.424897 | 1.695126  | C     | -4.529393 | -3.368870 | 1.665258  |
| H     | -3.845345 | -4.147714 | 2.242407  | H     | -3.938993 | -4.124995 | 2.201297  |
| H     | -5.290819 | -3.126017 | 2.338600  | H     | -5.348098 | -3.055631 | 2.310872  |
| H     | -4.894688 | -3.926232 | 0.825194  | H     | -4.972555 | -3.838712 | 0.783494  |
| C     | -3.811372 | -1.076698 | 2.190145  | C     | -3.856180 | -1.018283 | 2.148194  |
| H     | -4.749076 | -1.126112 | 2.740545  | H     | -4.797336 | -1.061037 | 2.693695  |
| H     | -2.985027 | -1.037035 | 2.914059  | H     | -3.035830 | -0.942739 | 2.876698  |
| H     | -3.811495 | -0.145437 | 1.619467  | H     | -3.865607 | -0.105585 | 1.547291  |
| C     | -4.519773 | 2.138868  | -0.887155 | C     | -4.509405 | 2.160705  | -0.861675 |
| N     | -5.576356 | 1.870826  | -1.275263 | N     | -5.575685 | 1.899811  | -1.225927 |
| ***** |           |           |           | ***** |           |           |           |

Singlet optimization coordinates:

| C1234-S1-VACUUM |             |             |             | C1234-S1-CCl4 |             |             |             |
|-----------------|-------------|-------------|-------------|---------------|-------------|-------------|-------------|
| C               | -2.43464500 | -3.77479000 | -1.01077300 | C             | -2.45364000 | -3.77442600 | -1.00784500 |
| C               | -1.66769400 | -2.87580000 | -1.78222500 | C             | -1.68143700 | -2.87924900 | -1.77923700 |
| H               | -1.17670100 | -3.22351500 | -2.68445000 | H             | -1.19048100 | -3.22991700 | -2.68030000 |
| C               | -3.13722100 | -3.30604500 | 0.07572300  | C             | -3.15366500 | -3.30176900 | 0.07871100  |
| H               | -3.78025200 | -3.97224700 | 0.64176700  | H             | -3.80040100 | -3.96396700 | 0.64519200  |
| C               | -1.55722900 | -1.55442800 | -1.41171600 | C             | -1.56370700 | -1.55818400 | -1.40847900 |
| H               | -0.99633400 | -0.87643700 | -2.03926400 | H             | -0.99495300 | -0.88520200 | -2.03431100 |
| C               | -3.08037900 | -1.94249400 | 0.45324900  | C             | -3.08965700 | -1.93745600 | 0.45525200  |
| C               | -2.20480700 | -1.04854400 | -0.25076200 | C             | -2.20941700 | -1.04809900 | -0.24888000 |
| C               | -3.93769800 | -1.42854600 | 1.46323100  | C             | -3.94662900 | -1.41951700 | 1.46355900  |
| H               | -4.58543900 | -2.11193600 | 2.00172400  | H             | -4.59767500 | -2.09974700 | 2.00196900  |
| C               | -3.99878800 | -0.08138600 | 1.69267200  | C             | -4.00368100 | -0.07090100 | 1.69032800  |
| H               | -4.71491800 | 0.32113800  | 2.40155500  | H             | -4.72001800 | 0.33521000  | 2.39692700  |
| C               | -3.12570200 | 0.82660000  | 1.03073400  | C             | -3.12682500 | 0.83265100  | 1.02817000  |
| C               | -2.11106100 | 0.33442600  | 0.16530700  | C             | -2.11115400 | 0.33689700  | 0.16524400  |
| C               | -3.28569300 | 2.23572700  | 1.21317200  | C             | -3.28434600 | 2.24364300  | 1.21029400  |
| H               | -4.10152500 | 2.58423900  | 1.83719500  | H             | -4.10031300 | 2.59393300  | 1.83304100  |
| C               | -2.48033300 | 3.13180600  | 0.56095600  | C             | -2.47620300 | 3.13638600  | 0.55896300  |
| H               | -2.66735500 | 4.19752100  | 0.64192500  | H             | -2.66024000 | 4.20271700  | 0.63832300  |
| C               | -1.36071400 | 2.69420000  | -0.18134700 | C             | -1.35530200 | 2.69467100  | -0.18209400 |
| C               | -1.08749800 | 1.25983500  | -0.26943600 | C             | -1.08425200 | 1.25830200  | -0.26811600 |
| C               | -0.47715900 | 3.63260600  | -0.76174100 | C             | -0.47208600 | 3.63100800  | -0.76336300 |
| H               | -0.75385900 | 4.68107500  | -0.72315800 | H             | -0.74657400 | 4.68002500  | -0.72521900 |
| C               | 0.73979300  | 3.26381000  | -1.31950400 | C             | 0.74526800  | 3.25926500  | -1.32232900 |
| H               | 1.40869300  | 4.00750600  | -1.73616500 | H             | 1.41474000  | 4.00182500  | -1.74015000 |

|       |             |             |             |       |             |             |             |
|-------|-------------|-------------|-------------|-------|-------------|-------------|-------------|
| C     | 1.14893200  | 1.91524300  | -1.20923100 | C     | 1.15267300  | 1.91111400  | -1.21066900 |
| C     | 0.24784500  | 0.90814000  | -0.63842600 | C     | 0.25116200  | 0.90414600  | -0.63867000 |
| C     | 2.35836800  | 1.31220400  | -1.50294900 | C     | 2.36278300  | 1.30818600  | -1.50435800 |
| H     | 3.21810300  | 1.80930100  | -1.93493500 | H     | 3.22163000  | 1.80500100  | -1.93833800 |
| H     | -2.50211200 | -4.81773900 | -1.29887900 | H     | -2.52612200 | -4.81709800 | -1.29572600 |
| C     | 0.98126600  | -0.26737300 | -0.50751900 | C     | 0.98370400  | -0.27110600 | -0.50797200 |
| C     | 3.47828900  | -0.45850300 | -0.07796600 | C     | 3.48321700  | -0.46119400 | -0.07579900 |
| C     | 3.54122500  | 0.21836800  | 1.14791200  | C     | 3.54322800  | 0.20894600  | 1.15390600  |
| C     | 4.44448600  | -1.42795300 | -0.36261100 | C     | 4.45446100  | -1.42406800 | -0.36680200 |
| C     | 4.54784500  | -0.07012900 | 2.06578400  | C     | 4.55188600  | -0.07979200 | 2.07012000  |
| H     | 2.79561100  | 0.97135500  | 1.37824500  | H     | 2.79451300  | 0.95707300  | 1.39016500  |
| C     | 5.45304900  | -1.71755600 | 0.55426300  | C     | 5.46534800  | -1.71377700 | 0.54821600  |
| H     | 4.40408900  | -1.95971600 | -1.30828000 | H     | 4.41676200  | -1.95067000 | -1.31537100 |
| C     | 5.50727000  | -1.03871100 | 1.77170500  | C     | 5.51662100  | -1.04179900 | 1.76989900  |
| H     | 4.58350600  | 0.46017000  | 3.01096800  | H     | 4.58503900  | 0.44521600  | 3.01834200  |
| H     | 6.19523300  | -2.47287100 | 0.32024200  | H     | 6.21128700  | -2.46377100 | 0.30918300  |
| H     | 6.29125200  | -1.26392500 | 2.48590900  | H     | 6.30204800  | -1.26702300 | 2.48249100  |
| H     | 0.64362600  | -1.17276300 | -0.02503500 | H     | 0.64497900  | -1.17826800 | -0.02951800 |
| C     | 2.36855100  | -0.13239500 | -1.07983400 | C     | 2.37246300  | -0.13565100 | -1.07786200 |
| H     | 2.51660000  | -0.81102500 | -1.94137300 | H     | 2.52091000  | -0.81468300 | -1.93783900 |
| ***** |             |             |             | ***** |             |             |             |

| C1234-S1-DCM |             |             |             | C1234-S1-DMSO |             |             |             |
|--------------|-------------|-------------|-------------|---------------|-------------|-------------|-------------|
| C            | -2.46611100 | -3.77630100 | -1.00455900 | C             | -2.46476200 | -3.77874800 | -1.00342300 |
| C            | -1.68873200 | -2.88427200 | -1.77509900 | C             | -1.68615700 | -2.88692100 | -1.77319900 |
| H            | -1.19538100 | -3.23765600 | -2.67369900 | H             | -1.19057700 | -3.24075100 | -2.67034200 |
| C            | -3.16592700 | -3.30029300 | 0.08086200  | C             | -3.16602700 | -3.30236900 | 0.08100000  |
| H            | -3.81598800 | -3.95929300 | 0.64715700  | H             | -3.81669800 | -3.96110800 | 0.64683400  |
| C            | -1.56627900 | -1.56311800 | -1.40451600 | C             | -1.56418100 | -1.56547400 | -1.40282200 |
| H            | -0.98897000 | -0.89520700 | -2.02790100 | H             | -0.98401200 | -0.89888700 | -2.02495500 |
| C            | -3.09711900 | -1.93499500 | 0.45609500  | C             | -3.09764200 | -1.93657000 | 0.45567600  |
| C            | -2.21245700 | -1.04921600 | -0.24739000 | C             | -2.21207200 | -1.05092900 | -0.24708700 |
| C            | -3.95548100 | -1.41396200 | 1.46176200  | C             | -3.95779000 | -1.41549500 | 1.45988000  |
| H            | -4.60955200 | -2.09160700 | 1.99963700  | H             | -4.61240700 | -2.09298000 | 1.99724400  |
| C            | -4.01019200 | -0.06388900 | 1.68585900  | C             | -4.01347700 | -0.06495700 | 1.68303500  |
| H            | -4.72778500 | 0.34495900  | 2.38950600  | H             | -4.73240300 | 0.34392600  | 2.38524000  |
| C            | -3.12998400 | 0.83623800  | 1.02440400  | C             | -3.13279800 | 0.83508500  | 1.02241000  |
| C            | -2.11177800 | 0.33814800  | 0.16468100  | C             | -2.11253800 | 0.33746400  | 0.16432700  |
| C            | -3.28683800 | 2.24896900  | 1.20678500  | C             | -3.29123000 | 2.24826500  | 1.20510500  |
| H            | -4.10379300 | 2.59971700  | 1.82783900  | H             | -4.10932500 | 2.59804400  | 1.82515500  |
| C            | -2.47620900 | 3.13947000  | 0.55769500  | C             | -2.48027000 | 3.13903500  | 0.55764200  |
| H            | -2.65812000 | 4.20620700  | 0.63592000  | H             | -2.66257300 | 4.20570100  | 0.63564100  |
| C            | -1.35280000 | 2.69500500  | -0.18152000 | C             | -1.35494700 | 2.69501400  | -0.18037100 |
| C            | -1.08228800 | 1.25683600  | -0.26628800 | C             | -1.08293100 | 1.25648700  | -0.26501700 |
| C            | -0.47086400 | 3.63059600  | -0.76242600 | C             | -0.47423200 | 3.63148000  | -0.76028400 |
| H            | -0.74427900 | 4.67980200  | -0.72376700 | H             | -0.74838600 | 4.68043700  | -0.72105600 |
| C            | 0.74766700  | 3.25785200  | -1.32252700 | C             | 0.74538600  | 3.25998000  | -1.32048500 |
| H            | 1.41666600  | 4.00042700  | -1.74107900 | H             | 1.41338500  | 4.00358400  | -1.73880900 |
| C            | 1.15496300  | 1.91061700  | -1.20999800 | C             | 1.15410500  | 1.91346500  | -1.20808200 |
| C            | 0.25394400  | 0.90207600  | -0.63810700 | C             | 0.25414600  | 0.90315300  | -0.63689100 |
| C            | 2.36676900  | 1.30958800  | -1.50388300 | C             | 2.36721600  | 1.31447000  | -1.50216200 |
| H            | 3.22372000  | 1.80726800  | -1.94051200 | H             | 3.22286000  | 1.81332100  | -1.93997500 |
| H            | -2.54144300 | -4.81894200 | -1.29169000 | H             | -2.53936800 | -4.82153700 | -1.29011800 |
| C            | 0.98694700  | -0.27225700 | -0.50896500 | C             | 0.98850100  | -0.27021800 | -0.50880900 |
| C            | 3.48862300  | -0.46079000 | -0.07452900 | C             | 3.49096600  | -0.45790500 | -0.07464900 |

|       |            |             |             |       |            |             |             |
|-------|------------|-------------|-------------|-------|------------|-------------|-------------|
| C     | 3.54977800 | 0.20542400  | 1.15733900  | C     | 3.55678500 | 0.20985200  | 1.15620400  |
| C     | 4.46029900 | -1.42228500 | -0.37000900 | C     | 4.45842600 | -1.42374700 | -0.37029800 |
| C     | 4.55980100 | -0.08568600 | 2.07201600  | C     | 4.56720000 | -0.08381000 | 2.06991900  |
| H     | 2.80178900 | 0.95300800  | 1.39791100  | H     | 2.81257300 | 0.96112400  | 1.39718800  |
| C     | 5.47264400 | -1.71452500 | 0.54341900  | C     | 5.47104300 | -1.71880500 | 0.54225100  |
| H     | 4.42251500 | -1.94552300 | -1.32027300 | H     | 4.41745000 | -1.94793800 | -1.31982600 |
| C     | 5.52502900 | -1.04657100 | 1.76761000  | C     | 5.52812500 | -1.04926500 | 1.76550000  |
| H     | 4.59386500 | 0.43664400  | 3.02168400  | H     | 4.60506700 | 0.44011800  | 3.01856600  |
| H     | 6.21876000 | -2.46312000 | 0.30074700  | H     | 6.21380300 | -2.47063500 | 0.29936300  |
| H     | 6.31142300 | -1.27353400 | 2.47854700  | H     | 6.31478000 | -1.27823700 | 2.47548600  |
| H     | 0.64748000 | -1.18322500 | -0.03830200 | H     | 0.64948700 | -1.18348900 | -0.04229000 |
| C     | 2.37711000 | -0.13405900 | -1.07630800 | C     | 2.37891900 | -0.12946200 | -1.07554700 |
| H     | 2.52599800 | -0.81152200 | -1.93614500 | H     | 2.52774900 | -0.80514700 | -1.93629800 |
| ***** |            |             |             | ***** |            |             |             |

| C1234-S1-n-hexane |             |             |             | 1C234-S1-VACUUM |             |             |             |
|-------------------|-------------|-------------|-------------|-----------------|-------------|-------------|-------------|
| C                 | -2.45018100 | -3.77444200 | -1.00841900 | C               | 5.54555500  | 0.97299300  | -0.30018800 |
| C                 | -1.67900800 | -2.87853600 | -1.77985800 | C               | 4.42256400  | 1.68257100  | -0.78125200 |
| H                 | -1.18815100 | -3.22863200 | -2.68120800 | H               | 4.56256500  | 2.66587400  | -1.21816000 |
| C                 | -3.15060600 | -3.30253300 | 0.07817900  | C               | 5.37713400  | -0.31595300 | 0.18259000  |
| H                 | -3.79663300 | -3.96548200 | 0.64460200  | H               | 6.23536400  | -0.89621000 | 0.50588900  |
| C                 | -1.56259700 | -1.55742500 | -1.40912700 | C               | 3.15564700  | 1.14556300  | -0.72498500 |
| H                 | -0.99540400 | -0.88345500 | -2.03532000 | H               | 2.32454600  | 1.69453200  | -1.14461700 |
| C                 | -3.08791300 | -1.93836900 | 0.45491800  | C               | 4.10509300  | -0.91365200 | 0.23239800  |
| C                 | -2.20858100 | -1.04814900 | -0.24921900 | C               | 2.92941100  | -0.15831700 | -0.16980000 |
| C                 | -3.94491000 | -1.42118100 | 1.46357300  | C               | 3.93784500  | -2.26574400 | 0.63573100  |
| H                 | -4.59532000 | -2.10201400 | 2.00201000  | H               | 4.81060600  | -2.82311600 | 0.96052100  |
| C                 | -4.00272200 | -0.07284200 | 1.69083600  | C               | 2.71443100  | -2.88103200 | 0.57875500  |
| H                 | -4.71900500 | 0.33259500  | 2.39788500  | H               | 2.61873200  | -3.92771800 | 0.84889600  |
| C                 | -3.12659200 | 0.83154300  | 1.02868700  | C               | 1.54143800  | -2.17154000 | 0.17061200  |
| C                 | -2.11115000 | 0.33645200  | 0.16528100  | C               | 1.64823900  | -0.75637500 | -0.06737200 |
| C                 | -3.28456400 | 2.24218300  | 1.21082400  | C               | 0.32744500  | -2.84829800 | -0.03171500 |
| H                 | -4.10049600 | 2.59217200  | 1.83380800  | H               | 0.30917500  | -3.92410800 | 0.10917800  |
| C                 | -2.47695400 | 3.13553600  | 0.55927400  | C               | -0.84674800 | -2.18507000 | -0.46393700 |
| H                 | -2.66156800 | 4.20175400  | 0.63890000  | H               | -1.75511700 | -2.74104500 | -0.65986100 |
| C                 | -1.35631300 | 2.69458400  | -0.18201100 | C               | -0.80871300 | -0.81473800 | -0.56718000 |
| C                 | -1.08486600 | 1.25859700  | -0.26836300 | C               | 0.38062300  | -0.06951300 | -0.22636900 |
| C                 | -0.47299800 | 3.63127600  | -0.76315100 | C               | -1.39738000 | 1.44256800  | -0.29359200 |
| H                 | -0.74788400 | 4.68019900  | -0.72499200 | H               | 6.53150200  | 1.41969600  | -0.34483600 |
| C                 | 0.74427000  | 3.26003300  | -1.32185300 | C               | -3.31967500 | -0.26022400 | -0.38707000 |
| H                 | 1.41367000  | 4.00278700  | -1.73944100 | C               | -4.81468200 | -0.86523400 | 1.42636600  |
| C                 | 1.15196600  | 1.91178800  | -1.21044400 | C               | -4.38367300 | -0.40611500 | -1.28160600 |
| C                 | 0.25051400  | 0.90486000  | -0.63860100 | C               | -5.87004600 | -1.00733300 | 0.52399600  |
| C                 | 2.36190800  | 1.30877200  | -1.50411600 | C               | -5.65126500 | -0.77710300 | -0.83201200 |
| H                 | 3.22097200  | 1.80559500  | -1.93767600 | H               | -4.21925400 | -0.22932600 | -2.33994000 |
| H                 | -2.52176900 | -4.81715900 | -1.29637200 | H               | -6.46424400 | -0.88617200 | -1.54123200 |
| C                 | 0.98318800  | -0.27044900 | -0.50776100 | C               | -0.02292600 | 1.26840200  | 0.07399100  |
| C                 | 3.48228200  | -0.46076100 | -0.07614800 | C               | 0.65390400  | 2.33420300  | 0.72726500  |
| C                 | 3.54272100  | 0.21051200  | 1.15291200  | C               | -0.01224700 | 3.53662000  | 0.91280800  |
| C                 | 4.45276800  | -1.42464000 | -0.36610300 | C               | -1.34033300 | 3.70790700  | 0.49347100  |
| C                 | 4.55107800  | -0.07809300 | 2.06937400  | C               | -2.04492800 | 2.64248400  | -0.09522000 |
| H                 | 2.79442600  | 0.95935700  | 1.38818300  | H               | 1.66147400  | 2.20142400  | 1.09642300  |
| C                 | 5.46330800  | -1.71422600 | 0.54919100  | H               | 0.49704400  | 4.35634300  | 1.40769100  |
| H                 | 4.41463000  | -1.95213500 | -1.31418100 | H               | -1.83425300 | 4.66052900  | 0.64708700  |
| C                 | 5.51501800  | -1.04108900 | 1.77015500  | H               | -3.08636400 | 2.76239000  | -0.37330600 |

|       |            |             |             |       |             |             |             |
|-------|------------|-------------|-------------|-------|-------------|-------------|-------------|
| H     | 4.58459500 | 0.44778300  | 3.01710200  | C     | -3.55160700 | -0.49544500 | 0.97490000  |
| H     | 6.20868800 | -2.46504800 | 0.31099100  | H     | -6.85389400 | -1.29536000 | 0.87684400  |
| H     | 6.30023300 | -1.26623900 | 2.48300800  | H     | -4.97744200 | -1.04268700 | 2.48368500  |
| H     | 0.64469100 | -1.17714700 | -0.02827600 | H     | -2.73743500 | -0.38640200 | 1.68296900  |
| C     | 2.37165500 | -0.13518300 | -1.07814100 | C     | -1.94577800 | 0.14696000  | -0.88111100 |
| H     | 2.51999900 | -0.81423000 | -1.93835600 | H     | -1.99897100 | 0.25984600  | -1.97408900 |
| ***** |            |             |             | ***** |             |             |             |

| IC234-S1-CCl4 |             |             |             | IC234-S1-DCM |             |             |             |
|---------------|-------------|-------------|-------------|--------------|-------------|-------------|-------------|
| C             | 5.54344800  | 0.97320300  | -0.33234900 | C            | 5.54573200  | 0.97061200  | -0.34755400 |
| C             | 4.41442900  | 1.68406700  | -0.80259600 | C            | 4.41377600  | 1.68462000  | -0.80880500 |
| H             | 4.54980500  | 2.66642800  | -1.24280700 | H            | 4.54720900  | 2.66742900  | -1.24834400 |
| C             | 5.38156000  | -0.31325700 | 0.15644700  | C            | 5.38557700  | -0.31495400 | 0.14262200  |
| H             | 6.24427200  | -0.89047300 | 0.47336700  | H            | 6.24962300  | -0.89281100 | 0.45460200  |
| C             | 3.15057700  | 1.14633100  | -0.72930000 | C            | 3.15051300  | 1.14785300  | -0.72568900 |
| H             | 2.31323800  | 1.69474400  | -1.13716200 | H            | 2.31051300  | 1.69944600  | -1.12359100 |
| C             | 4.11099000  | -0.91344000 | 0.22213700  | C            | 4.11421000  | -0.91437200 | 0.21735300  |
| C             | 2.93136700  | -0.15861300 | -0.17034400 | C            | 2.93311500  | -0.15772400 | -0.16742400 |
| C             | 3.94958600  | -2.26452700 | 0.63531400  | C            | 3.95547600  | -2.26544200 | 0.63402300  |
| H             | 4.82584600  | -2.81908100 | 0.95515900  | H            | 4.83334000  | -2.81986900 | 0.94932300  |
| C             | 2.72723700  | -2.87796100 | 0.59382800  | C            | 2.73285000  | -2.87712000 | 0.59993000  |
| H             | 2.63151000  | -3.92302300 | 0.86959000  | H            | 2.63697900  | -3.92210000 | 0.87549000  |
| C             | 1.54857400  | -2.16755300 | 0.19193000  | C            | 1.55200800  | -2.16482100 | 0.20262700  |
| C             | 1.65252100  | -0.75514900 | -0.05491900 | C            | 1.65445300  | -0.75267600 | -0.04571300 |
| C             | 0.33525800  | -2.84371700 | -0.00484200 | C            | 0.33957200  | -2.84151900 | 0.00598100  |
| H             | 0.31525000  | -3.91874200 | 0.14112700  | H            | 0.31834400  | -3.91620100 | 0.15345200  |
| C             | -0.84144100 | -2.18098500 | -0.44456900 | C            | -0.83746200 | -2.17752400 | -0.43934500 |
| H             | -1.74790900 | -2.74193200 | -0.63586900 | H            | -1.74185600 | -2.74135900 | -0.63241000 |
| C             | -0.80794700 | -0.81495500 | -0.55966500 | C            | -0.80707500 | -0.81373800 | -0.55690900 |
| C             | 0.38137500  | -0.06569800 | -0.21727400 | C            | 0.38099500  | -0.06074800 | -0.20906300 |
| C             | -1.39982900 | 1.44030600  | -0.28189500 | C            | -1.40282000 | 1.44035400  | -0.27880500 |
| H             | 6.52903500  | 1.41976500  | -0.38925700 | H            | 6.53158700  | 1.41582400  | -0.41116900 |
| C             | -3.32276400 | -0.26198600 | -0.39196100 | C            | -3.32375100 | -0.26426400 | -0.39363100 |
| C             | -4.83369500 | -0.86822200 | 1.40844800  | C            | -4.84115200 | -0.86864800 | 1.40286800  |
| C             | -4.37884000 | -0.40760400 | -1.29619900 | C            | -4.37550400 | -0.41542300 | -1.30227300 |
| C             | -5.88136200 | -1.01031300 | 0.49650700  | C            | -5.88478600 | -1.01642800 | 0.48654700  |
| C             | -5.65054700 | -0.77936400 | -0.85771000 | C            | -5.64844100 | -0.78919800 | -0.86773400 |
| H             | -4.20551300 | -0.22988800 | -2.35284500 | H            | -4.19836300 | -0.24027300 | -2.35855900 |
| H             | -6.45712800 | -0.88825900 | -1.57421600 | H            | -6.45154600 | -0.90225400 | -1.58744900 |
| C             | -0.02192000 | 1.26513900  | 0.08712500  | C            | -0.02322300 | 1.26545300  | 0.09473500  |
| C             | 0.65450000  | 2.33342500  | 0.74396400  | C            | 0.65044600  | 2.33809300  | 0.75287700  |
| C             | -0.01211100 | 3.53437000  | 0.92923100  | C            | -0.01766600 | 3.53782000  | 0.93443500  |
| C             | -1.34116900 | 3.70578400  | 0.50788500  | C            | -1.34657700 | 3.70825400  | 0.50758300  |
| C             | -2.04602800 | 2.63946300  | -0.08289600 | C            | -2.04904000 | 2.63940400  | -0.08455800 |
| H             | 1.66103100  | 2.20095200  | 1.11611500  | H            | 1.65627000  | 2.20890200  | 1.12807000  |
| H             | 0.49539100  | 4.35405500  | 1.42600900  | H            | 0.48709900  | 4.35894200  | 1.43161800  |
| H             | -1.83526300 | 4.65826300  | 0.66163900  | H            | -1.84146900 | 4.66088800  | 0.65747700  |
| H             | -3.08663600 | 2.76163400  | -0.36293600 | H            | -3.08784100 | 2.76247600  | -0.37070200 |
| C             | -3.56654400 | -0.49764300 | 0.96794600  | C            | -3.57276700 | -0.49613000 | 0.96616000  |
| H             | -6.86816100 | -1.29877300 | 0.84067400  | H            | -6.87231100 | -1.30631600 | 0.82738000  |
| H             | -5.00553400 | -1.04616000 | 2.46424500  | H            | -5.01698800 | -1.04365100 | 2.45848800  |
| H             | -2.75939700 | -0.38922300 | 1.68419000  | H            | -2.76966000 | -0.38380100 | 1.68647600  |
| C             | -1.94516300 | 0.14647100  | -0.87571500 | C            | -1.94517000 | 0.14647300  | -0.87422400 |
| H             | -1.99220800 | 0.26427900  | -1.96819200 | H            | -1.99065900 | 0.26549100  | -1.96621800 |
| *****         |             |             |             | *****        |             |             |             |

| 1C234-S1-DMSO |             |             |             | 1C234-S1-n-hexane |             |             |             |
|---------------|-------------|-------------|-------------|-------------------|-------------|-------------|-------------|
| C             | 5.54690200  | 0.97070400  | -0.34943200 | C                 | 5.52311700  | 0.98978500  | 0.02516600  |
| C             | 4.41408600  | 1.68610900  | -0.80743500 | C                 | 4.45170600  | 1.71384400  | -0.52528700 |
| H             | 4.54697400  | 2.66960100  | -1.24549700 | H                 | 4.61818300  | 2.70788400  | -0.92504500 |
| C             | 5.38715200  | -0.31507500 | 0.13958400  | C                 | 5.31650300  | -0.30646200 | 0.44825800  |
| H             | 6.25134800  | -0.89360800 | 0.44979400  | H                 | 6.14562300  | -0.89997800 | 0.81936100  |
| C             | 3.15093800  | 1.14943200  | -0.72238200 | C                 | 3.18722200  | 1.15914500  | -0.57733700 |
| H             | 2.31033700  | 1.70264500  | -1.11671600 | H                 | 2.39034700  | 1.71934200  | -1.04390700 |
| C             | 4.11532600  | -0.91435900 | 0.21591600  | C                 | 4.03955500  | -0.90677500 | 0.36686600  |
| C             | 2.93386100  | -0.15680100 | -0.16591000 | C                 | 2.92394500  | -0.13840600 | -0.08217400 |
| C             | 3.95762400  | -2.26591300 | 0.63184300  | C                 | 3.87673000  | -2.30517000 | 0.63391500  |
| H             | 4.83604600  | -2.82057500 | 0.94501800  | H                 | 4.73383300  | -2.87181400 | 0.98183700  |
| C             | 2.73488200  | -2.87730300 | 0.59892400  | C                 | 2.69768100  | -2.92216100 | 0.37063000  |
| H             | 2.63923100  | -3.92270500 | 0.87278100  | H                 | 2.59933600  | -3.99606800 | 0.48908700  |
| C             | 1.55344600  | -2.16411600 | 0.20381200  | C                 | 1.54159600  | -2.18221800 | -0.04977100 |
| C             | 1.65508500  | -0.75165700 | -0.04331200 | C                 | 1.60380700  | -0.75617600 | -0.13565500 |
| C             | 0.34139500  | -2.84136100 | 0.00635400  | C                 | 0.34733000  | -2.87241100 | -0.35595900 |
| H             | 0.32005200  | -3.91606300 | 0.15335500  | H                 | 0.34565000  | -3.95579600 | -0.30182000 |
| C             | -0.83572300 | -2.17676100 | -0.44031100 | C                 | -0.79230900 | -2.19031200 | -0.72720800 |
| H             | -1.73909300 | -2.74163300 | -0.63527600 | H                 | -1.69794300 | -2.72365100 | -0.99305300 |
| C             | -0.80668200 | -0.81354000 | -0.55704700 | C                 | -0.78155000 | -0.79456900 | -0.67324000 |
| C             | 0.38077400  | -0.05904800 | -0.20635300 | C                 | 0.36264600  | -0.07001100 | -0.30905400 |
| C             | -1.40424000 | 1.44005600  | -0.27870100 | C                 | -1.41691600 | 1.45946800  | -0.45567800 |
| H             | 6.53277500  | 1.41572400  | -0.41416000 | H                 | 6.51055800  | 1.43376900  | 0.08065700  |
| C             | -3.32386300 | -0.26577300 | -0.39365600 | C                 | -3.27885400 | -0.29303700 | -0.30508500 |
| C             | -4.84118400 | -0.87302900 | 1.40239100  | C                 | -4.59875600 | -0.84125300 | 1.65609800  |
| C             | -4.37594500 | -0.41462800 | -1.30241600 | C                 | -4.40570200 | -0.52174300 | -1.09858900 |
| C             | -5.88523200 | -1.01853700 | 0.48592900  | C                 | -5.71941300 | -1.06687600 | 0.85367000  |
| C             | -5.64902600 | -0.78873500 | -0.86809800 | C                 | -5.61982300 | -0.90611800 | -0.52542200 |
| H             | -4.19909600 | -0.23740300 | -2.35833200 | H                 | -4.33542700 | -0.39895700 | -2.17483200 |
| H             | -6.45233300 | -0.89996000 | -1.58784400 | H                 | -6.48335700 | -1.07886000 | -1.15824400 |
| C             | -0.02422600 | 1.26546000  | 0.09716600  | C                 | -0.06250000 | 1.33630600  | -0.08177300 |
| C             | 0.64781500  | 2.33999200  | 0.75586400  | C                 | 0.56629300  | 2.42742100  | 0.53177700  |
| C             | -0.02114200 | 3.53919500  | 0.93557800  | C                 | -0.13201000 | 3.62354100  | 0.69406100  |
| C             | -1.34972300 | 3.70911700  | 0.50575300  | C                 | -1.45217400 | 3.75060700  | 0.25814700  |
| C             | -2.05070400 | 2.63914500  | -0.08711000 | C                 | -2.10546200 | 2.65560500  | -0.30949400 |
| H             | 1.65340700  | 2.21256900  | 1.13229200  | H                 | 1.57895700  | 2.35452000  | 0.90187800  |
| H             | 0.48232600  | 4.36104400  | 1.43285800  | H                 | 0.35919300  | 4.46313900  | 1.17337200  |
| H             | -1.84495700 | 4.66190700  | 0.65335400  | H                 | -1.97805400 | 4.68994600  | 0.38644000  |
| H             | -3.08849300 | 2.76243600  | -0.37676500 | H                 | -3.14730000 | 2.72870500  | -0.60248700 |
| C             | -3.57261800 | -0.50024000 | 0.96584900  | C                 | -3.39089500 | -0.45790500 | 1.08168800  |
| H             | -6.87278500 | -1.30867500 | 0.82643200  | H                 | -6.66014100 | -1.36537900 | 1.30245800  |
| H             | -5.01677600 | -1.05012200 | 2.45770000  | H                 | -4.66796900 | -0.96432100 | 2.73132500  |
| H             | -2.76947400 | -0.39010300 | 1.68654700  | H                 | -2.52608800 | -0.28443100 | 1.71321500  |
| C             | -1.94535500 | 0.14594400  | -0.87436700 | C                 | -1.96063700 | 0.12716500  | -0.93490300 |
| H             | -1.99123400 | 0.26527000  | -1.96613200 | H                 | -2.11216900 | 0.17426100  | -2.02211800 |
| *****         |             |             |             | *****             |             |             |             |

| 12C34-vacuum |            |            |            | 12C34-CCl4 |            |            |            |
|--------------|------------|------------|------------|------------|------------|------------|------------|
| C            | 3.15637200 | 2.88230800 | 1.19835300 | C          | 3.15583300 | 2.87523600 | 1.21173100 |
| C            | 2.78191100 | 4.14186200 | 0.72574200 | C          | 2.79443500 | 4.13424600 | 0.72589300 |

|       |             |             |             |       |             |             |             |
|-------|-------------|-------------|-------------|-------|-------------|-------------|-------------|
| H     | 3.37296300  | 5.01639500  | 0.97311200  | H     | 3.38938700  | 5.00639400  | 0.97250800  |
| C     | 2.41013700  | 1.75225600  | 0.85159200  | C     | 2.40458200  | 1.74783200  | 0.86443600  |
| H     | 2.70791100  | 0.79139000  | 1.24698500  | H     | 2.69382400  | 0.78756700  | 1.26761700  |
| C     | 1.63254800  | 4.27365600  | -0.04097300 | C     | 1.65392900  | 4.26900400  | -0.05273500 |
| H     | 1.31367200  | 5.25405100  | -0.37896600 | H     | 1.34575100  | 5.24924600  | -0.40086400 |
| C     | 4.23406300  | -1.98274500 | -0.16506000 | C     | 4.22477000  | -1.99653800 | -0.14892700 |
| C     | 3.14858900  | -1.11792300 | -0.33693000 | C     | 3.14201700  | -1.12763900 | -0.32165000 |
| C     | 4.01720400  | -3.32005700 | 0.17228600  | C     | 4.00154800  | -3.33578600 | 0.17918500  |
| H     | 4.85722300  | -3.98716100 | 0.32943900  | H     | 4.83869300  | -4.00633000 | 0.33730700  |
| C     | 2.71886700  | -3.80059100 | 0.27822100  | C     | 2.70184700  | -3.81305700 | 0.27504800  |
| H     | 2.54329600  | -4.84759700 | 0.50194100  | H     | 2.52196200  | -4.86090900 | 0.49120200  |
| C     | 1.60008600  | -2.95739200 | 0.06552400  | C     | 1.58592000  | -2.96480900 | 0.05989200  |
| C     | 1.82362600  | -1.55411400 | -0.17751200 | C     | 1.81599500  | -1.56028200 | -0.17415600 |
| C     | 0.28760800  | -3.48865400 | 0.01854100  | C     | 0.27370400  | -3.49295500 | -0.00071200 |
| H     | 0.14990600  | -4.54985200 | 0.19628500  | H     | 0.13127600  | -4.55472700 | 0.16951000  |
| C     | -0.80569800 | -2.69378500 | -0.34029700 | C     | -0.81651600 | -2.69101300 | -0.36393700 |
| H     | -1.78930500 | -3.13743900 | -0.44921900 | H     | -1.79980600 | -3.13260200 | -0.48309500 |
| C     | -0.62268800 | -1.34165000 | -0.55183700 | C     | -0.62926300 | -1.33972300 | -0.56463600 |
| C     | 0.65541300  | -0.70855600 | -0.33421400 | C     | 0.64911400  | -0.70823300 | -0.33578200 |
| C     | -0.86792500 | 0.96294100  | -0.86852500 | C     | -0.86633000 | 0.96905100  | -0.87382700 |
| H     | 4.02820500  | 2.77353800  | 1.83316800  | H     | 4.02087500  | 2.76468600  | 1.85533300  |
| C     | -2.96290900 | -0.33581000 | -0.21262100 | C     | -2.96204800 | -0.32430900 | -0.20929600 |
| C     | -4.15268500 | -0.20756000 | 1.89807800  | C     | -4.14117000 | -0.18612500 | 1.90739400  |
| C     | -4.18958400 | -0.45772900 | -0.87076800 | C     | -4.19176100 | -0.45515700 | -0.86041800 |
| C     | -5.37263700 | -0.32878500 | 1.23063900  | C     | -5.36454800 | -0.31636700 | 1.24708900  |
| C     | -5.38804100 | -0.45488500 | -0.15642600 | C     | -5.38670400 | -0.45185300 | -0.13930400 |
| H     | -4.20723600 | -0.55810200 | -1.95172900 | H     | -4.21526400 | -0.56226500 | -1.94043600 |
| H     | -6.33061500 | -0.55286500 | -0.68381200 | H     | -6.33158600 | -0.55643300 | -0.66118900 |
| C     | 0.46240100  | 0.70706300  | -0.37451400 | C     | 0.46112100  | 0.70476700  | -0.37238700 |
| C     | 1.27691800  | 1.83902600  | 0.02665200  | C     | 1.28074200  | 1.83666900  | 0.02952400  |
| C     | 0.83286500  | 3.15132600  | -0.37113200 | C     | 0.84779900  | 3.14943400  | -0.38140500 |
| C     | -0.41838900 | 3.31606700  | -1.01522600 | C     | -0.39715300 | 3.31873000  | -1.03462500 |
| C     | -1.28541600 | 2.23596200  | -1.20271500 | C     | -1.27212800 | 2.24073100  | -1.21970500 |
| H     | -0.72698800 | 4.31512400  | -1.30382400 | H     | -0.69806300 | 4.31762300  | -1.33176900 |
| H     | -2.27769900 | 2.39872400  | -1.60974700 | H     | -2.25991700 | 2.40818600  | -1.63550700 |
| C     | -2.95917100 | -0.21122700 | 1.18291400  | C     | -2.95121700 | -0.19052500 | 1.18552400  |
| H     | -6.30215300 | -0.32567500 | 1.78873900  | H     | -6.29108100 | -0.31290100 | 1.81010200  |
| H     | -4.13274000 | -0.10993500 | 2.97795500  | H     | -4.11564400 | -0.08110900 | 2.98643800  |
| H     | -2.01528400 | -0.11689700 | 1.70882600  | H     | -2.00557500 | -0.08922500 | 1.70707100  |
| H     | 5.24278600  | -1.60797600 | -0.29483000 | H     | 5.23522800  | -1.62355600 | -0.26939400 |
| H     | 3.33983400  | -0.09265600 | -0.62119200 | H     | 3.33934600  | -0.10084500 | -0.59574200 |
| C     | -1.65699200 | -0.32717300 | -0.99794900 | C     | -1.66085900 | -0.31805900 | -1.00258500 |
| H     | -1.91260200 | -0.50605000 | -2.05419300 | H     | -1.92134700 | -0.49241200 | -2.05687500 |
| ***** |             |             |             | ***** |             |             |             |

| 12C34-DCM |            |             |             | 12C34-DMSO |            |             |             |
|-----------|------------|-------------|-------------|------------|------------|-------------|-------------|
| C         | 3.12999900 | 2.88548500  | 1.23230300  | C          | 3.11310400 | 2.89516600  | 1.24118000  |
| C         | 2.77593300 | 4.14143500  | 0.73186300  | C          | 2.75963100 | 4.14911800  | 0.73490100  |
| H         | 3.36787500 | 5.01502200  | 0.98055200  | H          | 3.34852300 | 5.02447500  | 0.98451500  |
| C         | 2.38257500 | 1.75587700  | 0.88184400  | C          | 2.36967600 | 1.76312600  | 0.88939400  |
| H         | 2.66747000 | 0.79840700  | 1.29474600  | H          | 2.65466500 | 0.80744200  | 1.30638500  |
| C         | 1.64688700 | 4.27156600  | -0.06390000 | C          | 1.63515200 | 4.27502000  | -0.06804300 |
| H         | 1.34410600 | 5.24958600  | -0.42276900 | H          | 1.33250500 | 5.25142900  | -0.43135900 |
| C         | 4.22532000 | -1.98733100 | -0.12267100 | C          | 4.22888200 | -1.97620900 | -0.11028100 |
| C         | 3.14106300 | -1.12053800 | -0.29870400 | C          | 3.14258800 | -1.11223400 | -0.28786900 |

|       |             |             |             |       |             |             |             |
|-------|-------------|-------------|-------------|-------|-------------|-------------|-------------|
| C     | 4.00290200  | -3.33090200 | 0.19055400  | C     | 4.00931100  | -3.32218900 | 0.19538000  |
| H     | 4.84055100  | -4.00006800 | 0.35163600  | H     | 4.84832600  | -3.98928000 | 0.35777100  |
| C     | 2.70421600  | -3.81329000 | 0.26818500  | C     | 2.71191600  | -3.80923000 | 0.26396400  |
| H     | 2.52553000  | -4.86373600 | 0.47227800  | H     | 2.53563200  | -4.86122000 | 0.46198700  |
| C     | 1.58725600  | -2.96613000 | 0.04851400  | C     | 1.59317200  | -2.96449300 | 0.04247900  |
| C     | 1.81561500  | -1.55828100 | -0.17090500 | C     | 1.81805300  | -1.55473900 | -0.16962800 |
| C     | 0.27849900  | -3.49923000 | -0.03173500 | C     | 0.28687300  | -3.50217300 | -0.04688400 |
| H     | 0.13766600  | -4.56294100 | 0.12707600  | H     | 0.14887500  | -4.56707500 | 0.10621400  |
| C     | -0.81214800 | -2.69595600 | -0.39982900 | C     | -0.80523900 | -2.70031100 | -0.41667400 |
| H     | -1.79175800 | -3.14124100 | -0.53443700 | H     | -1.78233000 | -3.14884200 | -0.55868600 |
| C     | -0.62890600 | -1.34347500 | -0.58435100 | C     | -0.62630700 | -1.34676700 | -0.59335400 |
| C     | 0.64587100  | -0.70659600 | -0.33986100 | C     | 0.64576800  | -0.70545000 | -0.34174600 |
| C     | -0.86975900 | 0.96716000  | -0.88710400 | C     | -0.87293800 | 0.96396500  | -0.89329600 |
| H     | 3.98618700  | 2.77889400  | 1.88811700  | H     | 3.96581000  | 2.79190500  | 1.90195800  |
| C     | -2.95660900 | -0.32773600 | -0.20473800 | C     | -2.95328100 | -0.33433200 | -0.20274700 |
| C     | -4.11409400 | -0.19382800 | 1.92509300  | C     | -4.10010100 | -0.20900700 | 1.93383300  |
| C     | -4.19309900 | -0.45551500 | -0.84400000 | C     | -4.19328700 | -0.45470000 | -0.83683700 |
| C     | -5.34462300 | -0.32107800 | 1.27670200  | C     | -5.33425900 | -0.32884400 | 1.29061300  |
| C     | -5.38081800 | -0.45279900 | -0.11015800 | C     | -5.37746200 | -0.45253400 | -0.09696400 |
| H     | -4.22818700 | -0.55928200 | -1.92380300 | H     | -4.23408600 | -0.55214300 | -1.91693000 |
| H     | -6.33095200 | -0.55486500 | -0.62282300 | H     | -6.33031800 | -0.54889400 | -0.60561900 |
| C     | 0.45489500  | 0.70257000  | -0.37316900 | C     | 0.45094400  | 0.70187200  | -0.37370200 |
| C     | 1.27116800  | 1.83928200  | 0.03173400  | C     | 1.26334700  | 1.84201200  | 0.03276800  |
| C     | 0.84394100  | 3.14948700  | -0.39540800 | C     | 0.83609500  | 3.15029700  | -0.40100200 |
| C     | -0.39222200 | 3.31523900  | -1.06537400 | C     | -0.39658100 | 3.31223600  | -1.07830200 |
| C     | -1.26839600 | 2.23454300  | -1.25001900 | C     | -1.27092300 | 2.22886200  | -1.26334600 |
| H     | -0.68846100 | 4.31159100  | -1.37545600 | H     | -0.69243400 | 4.30703700  | -1.39366900 |
| H     | -2.24995000 | 2.40010000  | -1.68098600 | H     | -2.24990400 | 2.39156400  | -1.70118000 |
| C     | -2.93130000 | -0.19771500 | 1.19054100  | C     | -2.92078400 | -0.21228900 | 1.19324500  |
| H     | -6.26532700 | -0.31838100 | 1.84915500  | H     | -6.25214000 | -0.32684300 | 1.86755700  |
| H     | -4.07729500 | -0.09197200 | 3.00410600  | H     | -4.05772100 | -0.11364800 | 3.01323600  |
| H     | -1.98085000 | -0.09915400 | 1.70405700  | H     | -1.96773500 | -0.11976400 | 1.70321600  |
| H     | 5.23561300  | -1.60939600 | -0.22717500 | H     | 5.23836300  | -1.59417700 | -0.20696200 |
| H     | 3.33958900  | -0.09021500 | -0.55788500 | H     | 3.33981100  | -0.07994600 | -0.53991600 |
| C     | -1.66376400 | -0.32054100 | -1.01258200 | C     | -1.66440400 | -0.32535000 | -1.01741200 |
| H     | -1.93422900 | -0.49256200 | -2.06334700 | H     | -1.93951100 | -0.49695500 | -2.06653000 |
| ***** |             |             |             | ***** |             |             |             |

| 12C34-n-hexane |            |             |             | P1234-VACUUM |             |             |             |
|----------------|------------|-------------|-------------|--------------|-------------|-------------|-------------|
| C              | 3.15814200 | 2.87515400  | 1.20847500  | C            | -2.64108900 | -3.75984500 | -0.98573700 |
| C              | 2.79465500 | 4.13449500  | 0.72535700  | C            | -1.87811000 | -2.86000000 | -1.75769300 |
| H              | 3.38943800 | 5.00678100  | 0.97188200  | H            | -1.40081000 | -3.20203600 | -2.66904400 |
| C              | 2.40713400 | 1.74763700  | 0.86150900  | C            | -3.31799500 | -3.29935900 | 0.12084400  |
| H              | 2.69773500 | 0.78706300  | 1.26295100  | H            | -3.95643300 | -3.96618900 | 0.69101300  |
| C              | 1.65220100 | 4.26933400  | -0.05047300 | C            | -1.74576700 | -1.54406100 | -1.37455700 |
| H              | 1.34238500 | 5.24978000  | -0.39657700 | H            | -1.18378600 | -0.86756300 | -2.00145300 |
| C              | 4.22573800 | -1.99586900 | -0.15303900 | C            | -3.23777400 | -1.94219400 | 0.51385300  |
| C              | 3.14282400 | -1.12722600 | -0.32539100 | C            | -2.37024600 | -1.04661500 | -0.19639800 |
| C              | 4.00313100 | -3.33451200 | 0.17744700  | C            | -4.06678500 | -1.43529400 | 1.55262900  |
| H              | 4.84055200 | -4.00478500 | 0.33525000  | H            | -4.70624100 | -2.12240600 | 2.09630600  |
| C              | 2.70350800 | -3.81169100 | 0.27603500  | C            | -4.11476700 | -0.09327300 | 1.80249900  |
| H              | 2.52400000 | -4.85921200 | 0.49410400  | H            | -4.81173200 | 0.30417500  | 2.53282900  |
| C              | 1.58735700 | -2.96390300 | 0.06146300  | C            | -3.25396600 | 0.81768700  | 1.12665600  |
| C              | 1.81688900 | -1.55979900 | -0.17485300 | C            | -2.26307200 | 0.33041700  | 0.23522500  |
| C              | 0.27482800 | -3.49194500 | 0.00409600  | C            | -3.41858100 | 2.22487400  | 1.31490800  |

|   |             |             |             |   |             |             |             |
|---|-------------|-------------|-------------|---|-------------|-------------|-------------|
| H | 0.13275300  | -4.55347500 | 0.17615100  | H | -4.21421400 | 2.56770200  | 1.96741500  |
| C | -0.81571000 | -2.69086000 | -0.35820500 | C | -2.64979300 | 3.12317700  | 0.62692300  |
| H | -1.79934000 | -3.13236700 | -0.47490500 | H | -2.84320700 | 4.18767900  | 0.70550900  |
| C | -0.62855900 | -1.33961300 | -0.56153800 | C | -1.54949100 | 2.68965500  | -0.15089200 |
| C | 0.65010600  | -0.70839000 | -0.33528500 | C | -1.24937400 | 1.26291100  | -0.22222100 |
| C | -0.86621900 | 0.96858400  | -0.87199100 | C | -0.69994900 | 3.62602300  | -0.77606000 |
| H | 4.02470800  | 2.76448200  | 1.85002900  | H | -0.97925400 | 4.67374100  | -0.74847400 |
| C | -2.96260800 | -0.32527700 | -0.21003500 | C | 0.49775600  | 3.24400700  | -1.36229000 |
| C | -4.14486300 | -0.18796200 | 1.90482000  | H | 1.14504400  | 3.98306300  | -1.82099800 |
| C | -4.19137900 | -0.45528800 | -0.86302800 | C | 0.93472300  | 1.90644300  | -1.24902700 |
| C | -5.36721900 | -0.31739300 | 1.24263500  | C | 0.07711800  | 0.91012700  | -0.61351300 |
| C | -5.38736100 | -0.45202000 | -0.14381000 | C | 2.16465500  | 1.38487300  | -1.65032500 |
| H | -4.21319700 | -0.56182700 | -1.94317300 | H | 2.92142600  | 1.97425500  | -2.15393000 |
| H | -6.33151300 | -0.55600700 | -0.66714900 | H | -2.72444900 | -4.79804500 | -1.28632000 |
| C | 0.46181200  | 0.70519800  | -0.37250000 | C | 0.76158900  | -0.30416600 | -0.43842200 |
| C | 1.28117800  | 1.83672600  | 0.02905600  | P | 2.33070800  | -0.37977300 | -1.31587700 |
| C | 0.84650800  | 3.14965800  | -0.37904400 | C | 3.63510000  | -0.52618200 | 0.03256500  |
| C | -0.39988900 | 3.31877700  | -1.02978400 | C | 3.58896000  | 0.24954900  | 1.19765100  |
| C | -1.27391700 | 2.24076600  | -1.21511500 | C | 4.68175300  | -1.43567200 | -0.14488400 |
| H | -0.70204600 | 4.31790800  | -1.32485300 | C | 4.57697800  | 0.11526700  | 2.16972700  |
| H | -2.26272700 | 2.40788200  | -1.62864200 | H | 2.77799300  | 0.95594600  | 1.34028200  |
| C | -2.95386600 | -0.19229300 | 1.18483200  | C | 5.67191900  | -1.56990500 | 0.82826400  |
| H | -6.29460600 | -0.31394000 | 1.80424600  | H | 4.71891900  | -2.03942500 | -1.04637300 |
| H | -4.12096700 | -0.08359600 | 2.98396700  | C | 5.61983800  | -0.79433800 | 1.98558800  |
| H | -2.00886200 | -0.09158300 | 1.70762100  | H | 4.53540600  | 0.71816300  | 3.07063200  |
| H | 5.23601900  | -1.62316300 | -0.27594800 | H | 6.48062100  | -2.27827700 | 0.68443900  |
| H | 3.33938500  | -0.10090900 | -0.60187700 | H | 6.38895000  | -0.89793500 | 2.74305900  |
| C | -1.66017200 | -0.31882200 | -1.00115200 | H | 0.36936100  | -1.14088300 | 0.12140000  |
| H | -1.91920000 | -0.49383400 | -2.05596100 |   |             |             |             |
|   | *****       |             |             |   | *****       |             |             |

| P1234-CCI4 |             |             |             | P1234-DCM |             |             |             |
|------------|-------------|-------------|-------------|-----------|-------------|-------------|-------------|
| C          | -2.68544300 | -3.75111800 | -0.97907400 | C         | -2.71839400 | -3.74546800 | -0.97536200 |
| C          | -1.91602700 | -2.85959200 | -1.75520600 | C         | -1.94634600 | -2.85912200 | -1.75573000 |
| H          | -1.44659000 | -3.20747500 | -2.66844100 | H         | -1.48473100 | -3.21060800 | -2.67159400 |
| C          | -3.35165000 | -3.28263200 | 0.13071700  | C         | -3.37469100 | -3.27208600 | 0.13839000  |
| H          | -3.99488000 | -3.94158300 | 0.70455000  | H         | -4.01969100 | -3.92588500 | 0.71596200  |
| C          | -1.76702200 | -1.54484800 | -1.37294500 | C         | -1.78464300 | -1.54547900 | -1.37334800 |
| H          | -1.19790100 | -0.87604200 | -2.00177700 | H         | -1.21084400 | -0.88202900 | -2.00378100 |
| C          | -3.25452000 | -1.92528800 | 0.52194700  | C         | -3.26518900 | -1.91454200 | 0.52853800  |
| C          | -2.38093200 | -1.03959600 | -0.19314200 | C         | -2.38867600 | -1.03546000 | -0.19108200 |
| C          | -4.07492200 | -1.40919600 | 1.56311800  | C         | -4.07851800 | -1.39247300 | 1.57243200  |
| H          | -4.71853100 | -2.08927300 | 2.11058000  | H         | -4.72401100 | -2.06761800 | 2.12357100  |
| C          | -4.11027200 | -0.06550700 | 1.81009500  | C         | -4.10567500 | -0.04733000 | 1.81692300  |
| H          | -4.80144700 | 0.33964300  | 2.54160400  | H         | -4.79231200 | 0.36291100  | 2.54969500  |
| C          | -3.24418800 | 0.83593700  | 1.12882300  | C         | -3.23724000 | 0.84771200  | 1.13086300  |
| C          | -2.25979200 | 0.33861200  | 0.23519300  | C         | -2.25746600 | 0.34399400  | 0.23494000  |
| C          | -3.39741200 | 2.24591000  | 1.31597800  | C         | -3.38354100 | 2.25989800  | 1.31803400  |
| H          | -4.18778200 | 2.59558200  | 1.97105000  | H         | -4.17023100 | 2.61333600  | 1.97529200  |
| C          | -2.62467600 | 3.13624200  | 0.62342200  | C         | -2.60856400 | 3.14496700  | 0.62287100  |
| H          | -2.80912300 | 4.20242200  | 0.69976400  | H         | -2.78689500 | 4.21218400  | 0.69780100  |
| C          | -1.52963000 | 2.69129700  | -0.15767800 | C         | -1.51640700 | 2.69237000  | -0.16065800 |
| C          | -1.24012800 | 1.26135500  | -0.22665800 | C         | -1.23408700 | 1.26000900  | -0.22971300 |
| C          | -0.67761200 | 3.61989400  | -0.78902900 | C         | -0.66335700 | 3.61644900  | -0.79469600 |
| H          | -0.94967600 | 4.66950700  | -0.76371600 | H         | -0.93006800 | 4.66732200  | -0.76884800 |

|       |             |             |             |       |             |             |             |
|-------|-------------|-------------|-------------|-------|-------------|-------------|-------------|
| C     | 0.51621800  | 3.22815700  | -1.37972400 | C     | 0.52820000  | 3.21913000  | -1.38961100 |
| H     | 1.16570600  | 3.96172100  | -1.84395300 | H     | 1.17878600  | 3.95004400  | -1.85626800 |
| C     | 0.94548000  | 1.88888700  | -1.26228300 | C     | 0.95248900  | 1.87893600  | -1.27111500 |
| C     | 0.08366300  | 0.89852400  | -0.62142900 | C     | 0.08806300  | 0.89090000  | -0.62842000 |
| C     | 2.17338700  | 1.36127600  | -1.66346900 | C     | 2.18040500  | 1.34931900  | -1.67217900 |
| H     | 2.93201700  | 1.94591300  | -2.16976600 | H     | 2.93988100  | 1.93247800  | -2.17891200 |
| H     | -2.78144800 | -4.78843300 | -1.27885500 | H     | -2.82366000 | -4.78193700 | -1.27479800 |
| C     | 0.76132600  | -0.31820600 | -0.44289100 | C     | 0.76142500  | -0.32730200 | -0.44973400 |
| P     | 2.33420700  | -0.40178100 | -1.31483100 | P     | 2.33907600  | -0.41273800 | -1.31551100 |
| C     | 3.63672800  | -0.53894200 | 0.03533900  | C     | 3.63939500  | -0.54567600 | 0.03592800  |
| C     | 3.57970200  | 0.23215800  | 1.20338000  | C     | 3.58178400  | 0.22845100  | 1.20236500  |
| C     | 4.69416800  | -1.43627700 | -0.14313500 | C     | 4.69672200  | -1.44447300 | -0.13909100 |
| C     | 4.56750500  | 0.10583100  | 2.17721200  | C     | 4.56856500  | 0.10376400  | 2.17797800  |
| H     | 2.76099100  | 0.92911100  | 1.34791600  | H     | 2.76414000  | 0.92690700  | 1.34554400  |
| C     | 5.68475800  | -1.56187900 | 0.83130400  | C     | 5.68636800  | -1.56852400 | 0.83711900  |
| H     | 4.74068100  | -2.03760100 | -1.04574200 | H     | 4.74524600  | -2.04840800 | -1.03976300 |
| C     | 5.62169200  | -0.79091800 | 1.99157800  | C     | 5.62253700  | -0.79461800 | 1.99579500  |
| H     | 4.51703400  | 0.70491600  | 3.08011500  | H     | 4.51756600  | 0.70525800  | 3.07913400  |
| H     | 6.50183100  | -2.26021300 | 0.68625100  | H     | 6.50298200  | -2.26771600 | 0.69442500  |
| H     | 6.39063700  | -0.88813700 | 2.74997100  | H     | 6.39043500  | -0.89058300 | 2.75527500  |
| H     | 0.36297200  | -1.15383100 | 0.11423600  | H     | 0.35830700  | -1.16467100 | 0.10132300  |
| ***** |             |             |             | ***** |             |             |             |

| P1234-DMSO |             |             |             | P1234-n-hexane |             |             |             |
|------------|-------------|-------------|-------------|----------------|-------------|-------------|-------------|
| C          | -2.72730500 | -3.74432400 | -0.97467000 | C              | -2.67784900 | -3.75257100 | -0.98013400 |
| C          | -1.95552700 | -2.85896700 | -1.75677100 | C              | -1.90939700 | -2.85968100 | -1.75547900 |
| H          | -1.49694400 | -3.21116400 | -2.67389800 | H              | -1.43849100 | -3.20660900 | -2.66831800 |
| C          | -3.38003800 | -3.27000800 | 0.14084700  | C              | -3.34600900 | -3.28538900 | 0.12901200  |
| H          | -4.02473400 | -3.92269900 | 0.71993700  | H              | -3.98853800 | -3.94564300 | 0.70215400  |
| C          | -1.79028200 | -1.54564600 | -1.37414000 | C              | -1.76326600 | -1.54471300 | -1.37311700 |
| H          | -1.21561800 | -0.88346400 | -2.00520900 | H              | -1.19533400 | -0.87460800 | -2.00161400 |
| C          | -3.26729000 | -1.91234000 | 0.53073300  | C              | -3.25176000 | -1.92807500 | 0.52053600  |
| C          | -2.39074100 | -1.03472400 | -0.19063900 | C              | -2.37911400 | -1.04073200 | -0.19367000 |
| C          | -4.07832800 | -1.38897400 | 1.57583800  | C              | -4.07367400 | -1.41350700 | 1.56124700  |
| H          | -4.72373800 | -2.06294300 | 2.12842800  | H              | -4.71663800 | -2.09477900 | 2.10801100  |
| C          | -4.10382400 | -0.04333000 | 1.81944700  | C              | -4.11112100 | -0.07011400 | 1.80874000  |
| H          | -4.78908200 | 0.36802100  | 2.55279000  | H              | -4.80329900 | 0.33375100  | 2.54003200  |
| C          | -3.23550300 | 0.85028900  | 1.13163400  | C              | -3.24585300 | 0.83292700  | 1.12843500  |
| C          | -2.25694400 | 0.34523200  | 0.23476600  | C              | -2.26035500 | 0.33725600  | 0.23522100  |
| C          | -3.38062200 | 2.26315400  | 1.31898500  | C              | -3.40094300 | 2.24241800  | 1.31570900  |
| H          | -4.16645500 | 2.61715300  | 1.97689200  | H              | -4.19220900 | 2.59100900  | 1.97031500  |
| C          | -2.60530000 | 3.14703400  | 0.62335900  | C              | -2.62884000 | 3.13407500  | 0.62387800  |
| H          | -2.78226500 | 4.21446200  | 0.69787800  | H              | -2.81480100 | 4.19998300  | 0.70057500  |
| C          | -1.51344000 | 2.69267100  | -0.16072300 | C              | -1.53294900 | 2.69103400  | -0.15665300 |
| C          | -1.23281900 | 1.25963400  | -0.23051600 | C              | -1.24166800 | 1.26163900  | -0.22591000 |
| C          | -0.66026800 | 3.61599800  | -0.79459100 | C              | -0.68129500 | 3.62087900  | -0.78706600 |
| H          | -0.92543800 | 4.66718100  | -0.76761500 | H              | -0.95459700 | 4.67017900  | -0.76151200 |
| C          | 0.53091800  | 3.21778200  | -1.39096100 | C              | 0.51316600  | 3.23070200  | -1.37693400 |
| H          | 1.18171000  | 3.94853600  | -1.85749600 | H              | 1.16231300  | 3.96511500  | -1.84032700 |
| C          | 0.95403600  | 1.87740700  | -1.27310800 | C              | 0.94369900  | 1.89169800  | -1.26007100 |
| C          | 0.08900200  | 0.88922300  | -0.63080200 | C              | 0.08256700  | 0.90045300  | -0.61998900 |
| C          | 2.18249500  | 1.34811500  | -1.67415800 | C              | 2.17185300  | 1.36495700  | -1.66128100 |
| H          | 2.94201100  | 1.93158800  | -2.18048900 | H              | 2.93019800  | 1.95027100  | -2.16722800 |
| H          | -2.83503000 | -4.78052300 | -1.27407700 | H              | -2.77170300 | -4.79005300 | -1.28004100 |
| C          | 0.76144700  | -0.32933500 | -0.45302800 | C              | 0.76134700  | -0.31588400 | -0.44187900 |

|       |            |             |             |       |            |             |             |
|-------|------------|-------------|-------------|-------|------------|-------------|-------------|
| P     | 2.34119400 | -0.41377500 | -1.31631100 | P     | 2.33345400 | -0.39836300 | -1.31490900 |
| C     | 3.64058800 | -0.54649600 | 0.03550100  | C     | 3.63635600 | -0.53693000 | 0.03495300  |
| C     | 3.58664100 | 0.23211600  | 1.19932100  | C     | 3.58079400 | 0.23465000  | 1.20267600  |
| C     | 4.69394300 | -1.45080200 | -0.13633100 | C     | 4.69240700 | -1.43577400 | -0.14357200 |
| C     | 4.57294200 | 0.10627900  | 2.17548900  | C     | 4.56870900 | 0.10723700  | 2.17616100  |
| H     | 2.77260200 | 0.93517000  | 1.34063500  | H     | 2.76303100 | 0.93276200  | 1.34703500  |
| C     | 5.68294900 | -1.57627000 | 0.84058000  | C     | 5.68302500 | -1.56254000 | 0.83057900  |
| H     | 4.74038600 | -2.05800900 | -1.03487400 | H     | 4.73757100 | -2.03730800 | -1.04612200 |
| C     | 5.62271400 | -0.79793600 | 1.99662000  | C     | 5.62144600 | -0.79109600 | 1.99053300  |
| H     | 4.52490900 | 0.71138400  | 3.07433900  | H     | 4.51943600 | 0.70672100  | 3.07888300  |
| H     | 6.49623700 | -2.27972800 | 0.70025500  | H     | 6.49904300 | -2.26213600 | 0.68555700  |
| H     | 6.39009100 | -0.89482000 | 2.75644900  | H     | 6.39049500 | -0.88918000 | 2.74873000  |
| H     | 0.35679400 | -1.16820200 | 0.09463200  | H     | 0.36405100 | -1.15153500 | 0.11596400  |
| ***** |            |             |             | ***** |            |             |             |

| 1P234-vacuum |             |             |             | 1P234-CCI4 |             |             |             |
|--------------|-------------|-------------|-------------|------------|-------------|-------------|-------------|
| C            | 5.60966300  | 0.96461200  | -0.14584400 | C          | 5.60568800  | 0.96654400  | -0.15434000 |
| C            | 4.50173900  | 1.67157000  | -0.66939500 | C          | 4.49604100  | 1.67377800  | -0.67479600 |
| H            | 4.65124000  | 2.65955600  | -1.09138400 | H          | 4.64404100  | 2.66139200  | -1.09799500 |
| C            | 5.43551000  | -0.32385400 | 0.32344300  | C          | 5.43430300  | -0.32223600 | 0.31778700  |
| H            | 6.28513500  | -0.89527700 | 0.68302100  | H          | 6.28611700  | -0.89090700 | 0.67649900  |
| C            | 3.24180700  | 1.12220600  | -0.66736000 | C          | 3.23721800  | 1.12304800  | -0.66731600 |
| H            | 2.42003100  | 1.66860200  | -1.10833400 | H          | 2.41303800  | 1.66782700  | -1.10567800 |
| C            | 4.16789900  | -0.93828800 | 0.31329800  | C          | 4.16821600  | -0.93844600 | 0.31274000  |
| C            | 3.00679300  | -0.19007400 | -0.13762300 | C          | 3.00540300  | -0.19088600 | -0.13573900 |
| C            | 3.99857300  | -2.29173500 | 0.70410200  | C          | 4.00146500  | -2.29262400 | 0.70963200  |
| H            | 4.86024100  | -2.84111500 | 1.06898300  | H          | 4.86509100  | -2.83962500 | 1.07315200  |
| C            | 2.78447800  | -2.91553000 | 0.58511500  | C          | 2.78916300  | -2.91589300 | 0.59629000  |
| H            | 2.68214800  | -3.96417300 | 0.84444000  | H          | 2.68638100  | -3.96429100 | 0.85589200  |
| C            | 1.62781900  | -2.21210100 | 0.12362500  | C          | 1.62963800  | -2.21140800 | 0.13472100  |
| C            | 1.72474900  | -0.79918100 | -0.09693800 | C          | 1.72584900  | -0.79899600 | -0.08950900 |
| C            | 0.43401400  | -2.89854300 | -0.16738400 | C          | 0.44009000  | -2.89710400 | -0.16397000 |
| H            | 0.41038100  | -3.97498700 | -0.03329000 | H          | 0.41393700  | -3.97341700 | -0.02997800 |
| C            | -0.68876400 | -2.24305400 | -0.71795100 | C          | -0.68114600 | -2.23993700 | -0.72680500 |
| H            | -1.55052400 | -2.81898400 | -1.03474800 | H          | -1.53947200 | -2.81930100 | -1.04683900 |
| C            | -0.68229100 | -0.86834700 | -0.80037300 | C          | -0.67764600 | -0.86784100 | -0.81097200 |
| C            | 0.45870100  | -0.11082500 | -0.30738300 | C          | 0.45674600  | -0.10821100 | -0.30844700 |
| C            | -1.22050900 | 1.59409200  | -0.41633400 | C          | -1.22467200 | 1.59298100  | -0.41782500 |
| H            | 6.59260800  | 1.42068600  | -0.14538800 | H          | 6.58867000  | 1.42275500  | -0.15757600 |
| C            | -3.47801600 | -0.26365600 | -0.36500200 | C          | -3.47817100 | -0.26124300 | -0.36526200 |
| C            | -4.53737600 | -0.90594100 | 1.71893900  | C          | -4.53618000 | -0.89114100 | 1.72340600  |
| C            | -4.72145800 | -0.34604000 | -1.00323300 | C          | -4.71896700 | -0.36300100 | -1.00590000 |
| C            | -5.77315500 | -0.98506800 | 1.07347900  | C          | -5.76979800 | -0.99018700 | 1.07553100  |
| C            | -5.86400900 | -0.70630300 | -0.28843000 | C          | -5.86007200 | -0.72708300 | -0.28960000 |
| H            | -4.79333100 | -0.12860800 | -2.06390800 | H          | -4.79164600 | -0.15798000 | -2.06891200 |
| H            | -6.82061900 | -0.76974300 | -0.79516000 | H          | -6.81462400 | -0.80526600 | -0.79800600 |
| P            | -2.01577900 | 0.24159400  | -1.38753000 | P          | -2.01761700 | 0.24284500  | -1.39097900 |
| C            | 0.08490200  | 1.21197700  | 0.05997700  | C          | 0.08261100  | 1.20904100  | 0.06114300  |
| C            | 0.80194800  | 2.13845200  | 0.87579000  | C          | 0.79947600  | 2.13726700  | 0.88021000  |
| C            | 0.27153800  | 3.39228400  | 1.12190500  | C          | 0.26860000  | 3.39035500  | 1.12482000  |
| C            | -0.97212200 | 3.77041600  | 0.59043200  | C          | -0.97471200 | 3.76959200  | 0.59012700  |
| C            | -1.72139400 | 2.85822700  | -0.16960000 | C          | -1.72356500 | 2.85743600  | -0.17297000 |
| H            | 1.73650300  | 1.84240500  | 1.33316900  | H          | 1.73309300  | 1.84170100  | 1.33955500  |
| H            | 0.81845700  | 4.08932200  | 1.74725300  | H          | 0.81356500  | 4.08747000  | 1.75177000  |
| H            | -1.36144700 | 4.76453100  | 0.77815400  | H          | -1.36485200 | 4.76308900  | 0.77912700  |

|       |             |             |             |       |             |             |             |
|-------|-------------|-------------|-------------|-------|-------------|-------------|-------------|
| H     | -2.69356800 | 3.14873000  | -0.55410600 | H     | -2.69438600 | 3.14998400  | -0.55919500 |
| C     | -3.39689700 | -0.54964400 | 1.00593500  | C     | -3.39756900 | -0.53058500 | 1.00905600  |
| H     | -6.65999700 | -1.26359100 | 1.63181100  | H     | -6.65504000 | -1.27185800 | 1.63472700  |
| H     | -4.46439500 | -1.12257800 | 2.77916400  | H     | -4.46353800 | -1.09541800 | 2.78602600  |
| H     | -2.44103400 | -0.49259400 | 1.51413900  | H     | -2.44417600 | -0.45817300 | 1.52003100  |
| ***** |             |             |             | ***** |             |             |             |

| 1P234-DCM |             |             |             | 1P234-DMSO |             |             |             |
|-----------|-------------|-------------|-------------|------------|-------------|-------------|-------------|
| C         | 5.60880300  | 0.96617800  | -0.16577200 | C          | 5.61011700  | 0.96785700  | -0.16805600 |
| C         | 4.49698900  | 1.67478600  | -0.68123600 | C          | 4.49735800  | 1.67684000  | -0.68171200 |
| H         | 4.64390500  | 2.66221800  | -1.10506100 | H          | 4.64365000  | 2.66456600  | -1.10499000 |
| C         | 5.43840700  | -0.32189900 | 0.30910200  | C          | 5.44030100  | -0.32019400 | 0.30681100  |
| H         | 6.29124000  | -0.89032000 | 0.66555600  | H          | 6.29339000  | -0.88869600 | 0.66239000  |
| C         | 3.23799300  | 1.12474000  | -0.66646700 | C          | 3.23845200  | 1.12658800  | -0.66516800 |
| H         | 2.41178300  | 1.67123400  | -1.09879100 | H          | 2.41156400  | 1.67397300  | -1.09509800 |
| C         | 4.17152200  | -0.93732900 | 0.31073500  | C          | 4.17313000  | -0.93572800 | 0.30999200  |
| C         | 3.00734300  | -0.18920900 | -0.13366200 | C          | 3.00832600  | -0.18754200 | -0.13280800 |
| C         | 4.00672000  | -2.29156300 | 0.71198900  | C          | 4.00946200  | -2.29014500 | 0.71178300  |
| H         | 4.87183600  | -2.83758000 | 1.07312300  | H          | 4.87516900  | -2.83564400 | 1.07216900  |
| C         | 2.79463400  | -2.91437500 | 0.60372700  | C          | 2.79760200  | -2.91339100 | 0.60441400  |
| H         | 2.69217100  | -3.96269300 | 0.86328200  | H          | 2.69577200  | -3.96185400 | 0.86344900  |
| C         | 1.63330300  | -2.20904800 | 0.14342100  | C          | 1.63558500  | -2.20807900 | 0.14467400  |
| C         | 1.72844700  | -0.79643400 | -0.08273000 | C          | 1.72968600  | -0.79515800 | -0.08111400 |
| C         | 0.44625400  | -2.89580200 | -0.15816300 | C          | 0.44954700  | -2.89579500 | -0.15817100 |
| H         | 0.41914600  | -3.97192100 | -0.02389500 | H          | 0.42262900  | -3.97193800 | -0.02450400 |
| C         | -0.67464100 | -2.23759300 | -0.72798100 | C          | -0.67157600 | -2.23741900 | -0.72972100 |
| H         | -1.53044000 | -2.81960000 | -1.05010400 | H          | -1.52619500 | -2.82056400 | -1.05294700 |
| C         | -0.67324500 | -0.86742400 | -0.81344100 | C          | -0.67146800 | -0.86784500 | -0.81476100 |
| C         | 0.45681500  | -0.10417600 | -0.30455800 | C          | 0.45701500  | -0.10289600 | -0.30325000 |
| C         | -1.22889000 | 1.59212400  | -0.41566900 | C          | -1.23089600 | 1.59103300  | -0.41524500 |
| H         | 6.59217400  | 1.42150500  | -0.17378800 | H          | 6.59340000  | 1.42331900  | -0.17697900 |
| C         | -3.47967300 | -0.26282100 | -0.36717800 | C          | -3.48005500 | -0.26479100 | -0.36790600 |
| C         | -4.54091700 | -0.89264200 | 1.72032500  | C          | -4.54084000 | -0.89980600 | 1.71848600  |
| C         | -4.71859900 | -0.36852100 | -1.01100600 | C          | -4.71986500 | -0.36484100 | -1.01102800 |
| C         | -5.77309500 | -0.99557200 | 1.06937500  | C          | -5.77408100 | -0.99683000 | 1.06830500  |
| C         | -5.86082500 | -0.73434200 | -0.29649600 | C          | -5.86246900 | -0.73013100 | -0.29656200 |
| H         | -4.79060000 | -0.16534000 | -2.07431100 | H          | -4.79286700 | -0.15766100 | -2.07344600 |
| H         | -6.81388500 | -0.81521600 | -0.80708300 | H          | -6.81621700 | -0.80643000 | -0.80648800 |
| P         | -2.01776800 | 0.24204800  | -1.38997400 | P          | -2.01795700 | 0.24058700  | -1.38998100 |
| C         | 0.08080400  | 1.20889300  | 0.06487400  | C          | 0.07958800  | 1.20841700  | 0.06634800  |
| C         | 0.79512700  | 2.14086700  | 0.88568000  | C          | 0.79209600  | 2.14185600  | 0.88835900  |
| C         | 0.26116400  | 3.39187800  | 1.12981100  | C          | 0.25648400  | 3.39186800  | 1.13237000  |
| C         | -0.98334900 | 3.76966600  | 0.59324900  | C          | -0.98829700 | 3.76888500  | 0.59450300  |
| C         | -1.72957400 | 2.85561300  | -0.17199500 | C          | -1.73283500 | 2.85398000  | -0.17201800 |
| H         | 1.72997900  | 1.84914800  | 1.34483400  | H          | 1.72735400  | 1.85188200  | 1.34777100  |
| H         | 0.80347200  | 4.09034700  | 1.75753300  | H          | 0.79730100  | 4.09083100  | 1.76080700  |
| H         | -1.37589200 | 4.76201400  | 0.78289100  | H          | -1.38204000 | 4.76072300  | 0.78413600  |
| H         | -2.70006200 | 3.14747200  | -0.55951200 | H          | -2.70308200 | 3.14535500  | -0.56048400 |
| C         | -3.40142200 | -0.52980500 | 1.00788200  | C          | -3.40104600 | -0.53716100 | 1.00614100  |
| H         | -6.65882600 | -1.27887200 | 1.62681300  | H          | -6.65995900 | -1.27995600 | 1.62552500  |
| H         | -4.47017600 | -1.09564400 | 2.78323300  | H          | -4.46953100 | -1.10729800 | 2.78045700  |
| H         | -2.44986700 | -0.45461100 | 1.52200600  | H          | -2.44890800 | -0.46684200 | 1.51995200  |
| *****     |             |             |             | *****      |             |             |             |

| 1P234-n-hexane |             |             |             | 12P34-vacuum |             |             |             |
|----------------|-------------|-------------|-------------|--------------|-------------|-------------|-------------|
| C              | 5.60578800  | 0.96634900  | -0.15273000 | C            | 2.77165800  | 2.86443100  | 1.58805500  |
| C              | 4.49651600  | 1.67340200  | -0.67396100 | C            | 2.52452400  | 4.12283900  | 1.03391500  |
| H              | 4.64474600  | 2.66106100  | -1.09701100 | H            | 3.05968600  | 4.99413600  | 1.39347800  |
| C              | 5.43408900  | -0.32245900 | 0.31891800  | C            | 2.10325500  | 1.73906100  | 1.10472000  |
| H              | 6.28562400  | -0.89137700 | 0.67791600  | H            | 2.30283200  | 0.77801900  | 1.55930800  |
| C              | 3.23760500  | 1.12273500  | -0.66766000 | C            | 1.56637300  | 4.25375400  | 0.03840400  |
| H              | 2.41384200  | 1.66745400  | -1.10689100 | H            | 1.33697500  | 5.23194300  | -0.37107400 |
| C              | 4.16793500  | -0.93858100 | 0.31281700  | C            | 4.39975200  | -1.54446500 | 0.00703000  |
| C              | 3.00541000  | -0.19102800 | -0.13629500 | C            | 3.23453300  | -0.82440500 | -0.25478000 |
| C              | 4.00077400  | -2.29263900 | 0.70886400  | C            | 4.32862400  | -2.89263700 | 0.36647900  |
| H              | 4.86408800  | -2.83991900 | 1.07275500  | H            | 5.23177000  | -3.44791700 | 0.59186900  |
| C              | 2.78824700  | -2.91598800 | 0.59468200  | C            | 3.09374100  | -3.52482100 | 0.40158000  |
| H              | 2.68551900  | -3.96438800 | 0.85439700  | H            | 3.03022400  | -4.58209600 | 0.63669500  |
| C              | 1.62916000  | -2.21170300 | 0.13302500  | C            | 1.90236800  | -2.82720800 | 0.09944800  |
| C              | 1.72555700  | -0.79927900 | -0.09086000 | C            | 1.96303600  | -1.41627200 | -0.16437000 |
| C              | 0.43889400  | -2.89731500 | -0.16453000 | C            | 0.66919900  | -3.52150100 | -0.03509800 |
| H              | 0.41303000  | -3.97365400 | -0.03050300 | H            | 0.64454100  | -4.58633100 | 0.17058300  |
| C              | -0.68255000 | -2.24042600 | -0.72552200 | C            | -0.46068600 | -2.87874300 | -0.52336800 |
| H              | -1.54149200 | -2.81923100 | -1.04488200 | H            | -1.35910800 | -3.45294900 | -0.72452700 |
| C              | -0.67854700 | -0.86792200 | -0.80957100 | C            | -0.45279600 | -1.50545200 | -0.74517500 |
| C              | 0.45696500  | -0.10885200 | -0.30864700 | C            | 0.71677900  | -0.70880100 | -0.41826500 |
| C              | -1.22383100 | 1.59316300  | -0.41759900 | C            | -0.78254200 | 0.95345200  | -1.21088200 |
| H              | 6.58872600  | 1.42263700  | -0.15516500 | H            | 3.48572400  | 2.75522800  | 2.39641300  |
| C              | -3.47813600 | -0.26124200 | -0.36512400 | C            | -3.08100700 | -0.47932200 | -0.11772700 |
| C              | -4.53624500 | -0.89259600 | 1.72298800  | C            | -3.74564900 | -0.35624900 | 2.21082800  |
| C              | -4.71929400 | -0.36057900 | -1.00540700 | C            | -4.43030200 | -0.44747400 | -0.48689000 |
| C              | -5.77014000 | -0.98918300 | 1.07545600  | C            | -5.08897800 | -0.32288600 | 1.83248100  |
| C              | -5.86054000 | -0.72417900 | -0.28927000 | C            | -5.43065200 | -0.37019900 | 0.48207500  |
| H              | -4.79182600 | -0.15400200 | -2.06814200 | H            | -4.69696900 | -0.48697400 | -1.53864300 |
| H              | -6.81538300 | -0.80055800 | -0.79743500 | H            | -6.47327700 | -0.35148700 | 0.18341200  |
| P              | -2.01737800 | 0.24290200  | -1.39056000 | P            | -1.80588900 | -0.53421900 | -1.49501900 |
| C              | 0.08311400  | 1.20927900  | 0.06083800  | C            | 0.44774600  | 0.68783900  | -0.48790900 |
| C              | 0.80035700  | 2.13698600  | 0.87936600  | C            | 1.17476300  | 1.82557800  | 0.05330100  |
| C              | 0.26984000  | 3.39032500  | 1.12424400  | C            | 0.84637700  | 3.13533700  | -0.44081200 |
| C              | -0.97346700 | 3.76961600  | 0.59020300  | C            | -0.23754800 | 3.29920800  | -1.34549900 |
| C              | -1.72270500 | 2.85767600  | -0.17235100 | C            | -1.06838500 | 2.23242100  | -1.67101000 |
| H              | 1.73400200  | 1.84099900  | 1.33841900  | H            | -0.45491900 | 4.29253000  | -1.72365800 |
| H              | 0.81531400  | 4.08731700  | 1.75089300  | H            | -1.94766600 | 2.40175400  | -2.28415900 |
| H              | -1.36325300 | 4.76327600  | 0.77914100  | C            | -2.74775400 | -0.43502400 | 1.24279100  |
| H              | -2.69370900 | 3.15012500  | -0.55821000 | H            | -5.86454600 | -0.26189600 | 2.58795200  |
| C              | -3.39742800 | -0.53262200 | 1.00877500  | H            | -3.47726600 | -0.32082500 | 3.26134700  |
| H              | -6.65557300 | -1.27043800 | 1.63458200  | H            | -1.70692700 | -0.46387400 | 1.54569600  |
| H              | -4.46353200 | -1.09835900 | 2.78533100  | H            | 5.36155200  | -1.05064300 | -0.07093600 |
| H              | -2.44366900 | -0.46211300 | 1.51931400  | H            | 3.31714400  | 0.21391900  | -0.54441000 |
| *****          |             |             |             | *****        |             |             |             |

| 12P34-CCl4 |            |            |             | 12P34-DCM |            |            |             |
|------------|------------|------------|-------------|-----------|------------|------------|-------------|
| C          | 2.76953700 | 2.86368200 | 1.59030400  | C         | 2.75307900 | 2.87295600 | 1.59365300  |
| C          | 2.52482200 | 4.12248000 | 1.03517200  | C         | 2.50720900 | 4.13067500 | 1.03573800  |
| H          | 3.06089400 | 4.99303300 | 1.39523400  | H         | 3.04034000 | 5.00275400 | 1.39636600  |
| C          | 2.09998900 | 1.73892400 | 1.10493900  | C         | 2.08757100 | 1.74579300 | 1.10666800  |
| H          | 2.29957700 | 0.77754800 | 1.55870800  | H         | 2.28968100 | 0.78550800 | 1.56153000  |
| C          | 1.56849100 | 4.25526700 | 0.03843600  | C         | 1.55402500 | 4.26076300 | 0.03576100  |
| H          | 1.34082900 | 5.23384600 | -0.37089700 | H         | 1.32518600 | 5.23845200 | -0.37484500 |

|       |             |             |             |       |             |             |             |
|-------|-------------|-------------|-------------|-------|-------------|-------------|-------------|
| C     | 4.40097800  | -1.54472900 | 0.00665800  | C     | 4.40679200  | -1.53009300 | 0.01194300  |
| C     | 3.23537400  | -0.82453900 | -0.25746900 | C     | 3.23854100  | -0.81407700 | -0.25503800 |
| C     | 4.32875300  | -2.89232200 | 0.36908700  | C     | 4.33851900  | -2.87827100 | 0.37424300  |
| H     | 5.23152000  | -3.44734900 | 0.59661000  | H     | 5.24276300  | -3.42965100 | 0.60456200  |
| C     | 3.09400600  | -3.52431000 | 0.40459100  | C     | 3.10640900  | -3.51523400 | 0.40664000  |
| H     | 3.02999700  | -4.58115700 | 0.64108000  | H     | 3.04571400  | -4.57228900 | 0.64262800  |
| C     | 1.90246200  | -2.82645400 | 0.09857200  | C     | 1.91244800  | -2.82129700 | 0.09665100  |
| C     | 1.96470400  | -1.41528000 | -0.16744000 | C     | 1.97070700  | -1.40924200 | -0.16904500 |
| C     | 0.67098500  | -3.52144600 | -0.03967500 | C     | 0.68549300  | -3.52200700 | -0.04702100 |
| H     | 0.64550000  | -4.58627700 | 0.16547600  | H     | 0.66333000  | -4.58708400 | 0.15678400  |
| C     | -0.45920300 | -2.87819200 | -0.53463600 | C     | -0.44740300 | -2.88177100 | -0.54731300 |
| H     | -1.35540300 | -3.45431300 | -0.73981300 | H     | -1.33936500 | -3.46296400 | -0.75651900 |
| C     | -0.45082300 | -1.50695300 | -0.75526200 | C     | -0.44389900 | -1.51216200 | -0.76555900 |
| C     | 0.71640500  | -0.70661900 | -0.42412700 | C     | 0.71823800  | -0.70388800 | -0.42969800 |
| C     | -0.78870600 | 0.95836300  | -1.20566900 | C     | -0.79703100 | 0.95706900  | -1.20433300 |
| H     | 3.48267700  | 2.75321400  | 2.39916900  | H     | 3.46428900  | 2.76491800  | 2.40436000  |
| C     | -3.07974400 | -0.47727300 | -0.11853900 | C     | -3.07611200 | -0.48578800 | -0.11780400 |
| C     | -3.74052200 | -0.37173500 | 2.21248100  | C     | -3.73111300 | -0.39461800 | 2.21607100  |
| C     | -4.42979500 | -0.43945300 | -0.48542000 | C     | -4.42709900 | -0.43937600 | -0.48146700 |
| C     | -5.08477800 | -0.33173500 | 1.83650100  | C     | -5.07642700 | -0.34527100 | 1.84339400  |
| C     | -5.42871500 | -0.36682900 | 0.48613600  | C     | -5.42365200 | -0.36855100 | 0.49337100  |
| H     | -4.69978500 | -0.47040000 | -1.53648200 | H     | -4.70128900 | -0.46135000 | -1.53153200 |
| H     | -6.47155500 | -0.34242500 | 0.18898800  | H     | -6.46684300 | -0.33649300 | 0.19862700  |
| P     | -1.80763300 | -0.53244600 | -1.49544500 | P     | -1.80814700 | -0.53961200 | -1.49594400 |
| C     | 0.44511900  | 0.68693000  | -0.48855400 | C     | 0.44016700  | 0.68549800  | -0.49007500 |
| C     | 1.17356500  | 1.82699800  | 0.05371300  | C     | 1.16484200  | 1.83080800  | 0.05342300  |
| C     | 0.84592600  | 3.13719600  | -0.44086100 | C     | 0.83445700  | 3.13974600  | -0.44395800 |
| C     | -0.24004600 | 3.30415300  | -1.34109300 | C     | -0.25189000 | 3.30450300  | -1.34329200 |
| C     | -1.07534500 | 2.23596700  | -1.66295700 | C     | -1.08722100 | 2.23172500  | -1.66210200 |
| H     | -0.45866500 | 4.29771800  | -1.71755500 | H     | -0.47391700 | 4.29695100  | -1.72043400 |
| H     | -1.95694800 | 2.40802300  | -2.27187600 | H     | -1.97029800 | 2.40274900  | -2.26911200 |
| C     | -2.74417400 | -0.44488800 | 1.24195800  | C     | -2.73710100 | -0.46510000 | 1.24239600  |
| H     | -5.85894600 | -0.27542300 | 2.59368800  | H     | -5.84850400 | -0.29133600 | 2.60276100  |
| H     | -3.47016900 | -0.34599300 | 3.26268000  | H     | -3.45812700 | -0.37860100 | 3.26568100  |
| H     | -1.70325600 | -0.47895200 | 1.54383600  | H     | -1.69599100 | -0.50643000 | 1.54268500  |
| H     | 5.36286800  | -1.05114200 | -0.07071300 | H     | 5.36683700  | -1.03254500 | -0.06149100 |
| H     | 3.31977300  | 0.21351800  | -0.54753200 | H     | 3.32108800  | 0.22485900  | -0.54235700 |
| ***** |             |             |             | ***** |             |             |             |

| 12P34-DMSO |            |             |             | 12P34-n-hexane |            |             |             |
|------------|------------|-------------|-------------|----------------|------------|-------------|-------------|
| C          | 2.73981800 | 2.88118700  | 1.59507000  | C              | 2.77066200 | 2.86325200  | 1.58981600  |
| C          | 2.49148400 | 4.13786400  | 1.03563400  | C              | 2.52567300 | 4.12207000  | 1.03500500  |
| H          | 3.02167300 | 5.01159600  | 1.39651800  | H              | 3.06178600 | 4.99263200  | 1.39498500  |
| C          | 2.07833900 | 1.75170900  | 1.10745300  | C              | 2.10104500 | 1.73855600  | 1.10477200  |
| H          | 2.28300300 | 0.79239200  | 1.56317800  | H              | 2.30052300 | 0.77714500  | 1.55853600  |
| C          | 1.53983300 | 4.26487900  | 0.03378600  | C              | 1.56891600 | 4.25478100  | 0.03862700  |
| H          | 1.30899000 | 5.24169300  | -0.37770500 | H              | 1.34108300 | 5.23337000  | -0.37062100 |
| C          | 4.41124900 | -1.51702200 | 0.01658100  | C              | 4.40050500 | -1.54542400 | 0.00643400  |
| C          | 3.24091100 | -0.80474600 | -0.25217900 | C              | 3.23509500 | -0.82504300 | -0.25730500 |
| C          | 4.34688000 | -2.86578600 | 0.37790600  | C              | 4.32820900 | -2.89304000 | 0.36854900  |
| H          | 5.25253500 | -3.41405300 | 0.60996100  | H              | 5.23094100 | -3.44827800 | 0.59570300  |
| C          | 3.11699900 | -3.50710600 | 0.40750000  | C              | 3.09330600 | -3.52479300 | 0.40415100  |
| H          | 3.05926400 | -4.56444500 | 0.64279000  | H              | 3.02917100 | -4.58167200 | 0.64054300  |
| C          | 1.92111000 | -2.81679500 | 0.09542800  | C              | 1.90192300 | -2.82678100 | 0.09877200  |
| C          | 1.97518100 | -1.40418300 | -0.16935100 | C              | 1.96416900 | -1.41569500 | -0.16700800 |

|       |             |             |             |       |             |             |             |
|-------|-------------|-------------|-------------|-------|-------------|-------------|-------------|
| C     | 0.69738400  | -3.52217200 | -0.05134300 | C     | 0.67000100  | -3.52139000 | -0.03875300 |
| H     | 0.67870300  | -4.58746800 | 0.15147500  | H     | 0.64447000  | -4.58621100 | 0.16652300  |
| C     | -0.43761400 | -2.88509700 | -0.55358400 | C     | -0.45999000 | -2.87807500 | -0.53261600 |
| H     | -1.32684200 | -3.46984000 | -0.76458300 | H     | -1.35668600 | -3.45368800 | -0.73709800 |
| C     | -0.43864000 | -1.51593700 | -0.77027200 | C     | -0.45143300 | -1.50647500 | -0.75349400 |
| C     | 0.72002300  | -0.70246300 | -0.43220700 | C     | 0.71635300  | -0.70704000 | -0.42313500 |
| C     | -0.80170700 | 0.95374000  | -1.20570300 | C     | -0.78750500 | 0.95781000  | -1.20644100 |
| H     | 3.45007600  | 2.77562500  | 2.40685400  | H     | 3.48404100  | 2.75279300  | 2.39849900  |
| C     | -3.07314200 | -0.49418000 | -0.11686200 | C     | -3.08005200 | -0.47709300 | -0.11847300 |
| C     | -3.72433600 | -0.40816500 | 2.21856800  | C     | -3.74154600 | -0.36868600 | 2.21211300  |
| C     | -4.42467700 | -0.44302600 | -0.47837200 | C     | -4.42996800 | -0.44043900 | -0.48576000 |
| C     | -5.07021700 | -0.35369700 | 1.84805200  | C     | -5.08563700 | -0.32996800 | 1.83570800  |
| C     | -5.41958000 | -0.37194600 | 0.49839700  | C     | -5.42915800 | -0.36715900 | 0.48533000  |
| H     | -4.70117800 | -0.46100800 | -1.52785500 | H     | -4.69933900 | -0.47290300 | -1.53696000 |
| H     | -6.46305700 | -0.33587300 | 0.20531500  | H     | -6.47196300 | -0.34384800 | 0.18790000  |
| P     | -1.80775500 | -0.54680100 | -1.49663100 | P     | -1.80738700 | -0.53230400 | -1.49542600 |
| C     | 0.43688300  | 0.68478000  | -0.49144900 | C     | 0.44569100  | 0.68713800  | -0.48843900 |
| C     | 1.15746900  | 1.83352500  | 0.05277500  | C     | 1.17413400  | 1.82661800  | 0.05365300  |
| C     | 0.82393500  | 3.14125800  | -0.44625500 | C     | 0.84651000  | 3.13683800  | -0.44065200 |
| C     | -0.26223300 | 3.30281800  | -1.34623700 | C     | -0.23921200 | 3.30352900  | -1.34145800 |
| C     | -1.09517600 | 2.22663000  | -1.66440400 | C     | -1.07390100 | 2.23576700  | -1.66399200 |
| H     | -0.48716800 | 4.29429800  | -1.72411600 | H     | -0.45753500 | 4.29713400  | -1.71804600 |
| H     | -1.97868200 | 2.39548900  | -2.27138500 | H     | -1.95514600 | 2.40752500  | -2.27353100 |
| C     | -2.73191800 | -0.47858000 | 1.24302400  | C     | -2.74491600 | -0.44266400 | 1.24203400  |
| H     | -5.84094300 | -0.29994700 | 2.60874900  | H     | -5.86006700 | -0.27296100 | 2.59259300  |
| H     | -3.44968000 | -0.39643800 | 3.26776300  | H     | -3.47154400 | -0.34126400 | 3.26237800  |
| H     | -1.69060000 | -0.52392700 | 1.54207700  | H     | -1.70400800 | -0.47573400 | 1.54407900  |
| H     | 5.36963000  | -1.01594000 | -0.05386900 | H     | 5.36248000  | -1.05201500 | -0.07122400 |
| H     | 3.32106300  | 0.23492500  | -0.53744600 | H     | 3.31936200  | 0.21298600  | -0.54751400 |
| ***** |             |             |             | ***** |             |             |             |

|                |             |             |             |                     |             |             |             |
|----------------|-------------|-------------|-------------|---------------------|-------------|-------------|-------------|
| 1-A-13-D-P1234 |             |             |             | 1-A-13-D-P1234-CC14 |             |             |             |
| C              | 2.29446000  | -3.62906300 | 0.45043300  | C                   | 2.33808200  | -3.62492400 | 0.41105300  |
| C              | 1.78660500  | -2.71032500 | 1.36026200  | C                   | 1.81508200  | -2.72290600 | 1.32889100  |
| C              | 2.96770800  | -3.18079800 | -0.67487400 | H                   | 1.44408800  | -3.08564200 | 2.27675900  |
| H              | 3.43433900  | -3.89159500 | -1.34726900 | C                   | 3.00683700  | -3.15615800 | -0.70967800 |
| C              | 1.89661100  | -1.32371400 | 1.10981700  | H                   | 3.49082400  | -3.85283800 | -1.38433500 |
| C              | 3.03315000  | -1.80042700 | -0.99730300 | C                   | 1.91032600  | -1.33134000 | 1.09652300  |
| C              | 2.33005200  | -0.86785300 | -0.19506300 | C                   | 3.04937400  | -1.77332300 | -1.01870400 |
| C              | 3.75833200  | -1.33772100 | -2.13162300 | C                   | 2.33662300  | -0.85561200 | -0.20431000 |
| H              | 4.29003700  | -2.05410400 | -2.74689300 | C                   | 3.76799800  | -1.29200000 | -2.15009300 |
| C              | 3.82331000  | 0.00236700  | -2.39003800 | H                   | 4.30727600  | -1.99782900 | -2.77083500 |
| H              | 4.45861900  | 0.37701400  | -3.18563100 | C                   | 3.81785200  | 0.05051900  | -2.39869400 |
| C              | 3.02528900  | 0.93464400  | -1.66876000 | H                   | 4.44734200  | 0.43880000  | -3.19219400 |
| C              | 2.11081200  | 0.46565600  | -0.68870500 | C                   | 3.01236900  | 0.96755500  | -1.66570700 |
| C              | 3.13660700  | 2.34170500  | -1.89748300 | C                   | 2.10556200  | 0.47997300  | -0.68439900 |
| H              | 3.84444600  | 2.70217300  | -2.63502900 | C                   | 3.11207300  | 2.37627200  | -1.88101000 |
| C              | 2.39788800  | 3.20847900  | -1.14452500 | H                   | 3.81639000  | 2.74856200  | -2.61598000 |
| H              | 2.54238500  | 4.27929800  | -1.24897100 | C                   | 2.36861400  | 3.23228500  | -1.11769300 |
| C              | 1.35834100  | 2.75486900  | -0.27762500 | H                   | 2.50670300  | 4.30484500  | -1.21149700 |
| C              | 1.08025700  | 1.35993700  | -0.19190600 | C                   | 1.33591400  | 2.76216700  | -0.25383300 |
| C              | 0.55139200  | 3.68669800  | 0.44858800  | C                   | 1.07024200  | 1.36316700  | -0.17769100 |
| H              | 0.81664000  | 4.73815500  | 0.41102900  | C                   | 0.52342700  | 3.68201400  | 0.48192100  |
| C              | -0.53412800 | 3.27022400  | 1.16565000  | H                   | 0.78262900  | 4.73532800  | 0.45322700  |
| H              | -1.12621300 | 3.98364500  | 1.72958200  | C                   | -0.55664300 | 3.25336400  | 1.19914800  |

|       |             |             |             |       |             |             |             |
|-------|-------------|-------------|-------------|-------|-------------|-------------|-------------|
| C     | -0.98025800 | 1.91128000  | 1.09165600  | H     | -1.15188500 | 3.95757500  | 1.77117100  |
| C     | -0.19903200 | 0.95003700  | 0.32398400  | C     | -0.99260500 | 1.89086500  | 1.11378300  |
| C     | -2.16675000 | 1.40816700  | 1.60654900  | C     | -0.20373000 | 0.94109800  | 0.33826400  |
| H     | 2.22462600  | -4.68860600 | 0.66113800  | C     | -2.17464000 | 1.37694700  | 1.62555000  |
| C     | -0.89340800 | -0.27758300 | 0.15490800  | H     | -2.87360200 | 1.94368300  | 2.22588400  |
| P     | -2.40731800 | -0.31991600 | 1.18152900  | H     | 2.28744200  | -4.68693500 | 0.61420700  |
| C     | -3.83225600 | -0.34927300 | -0.02828300 | C     | -0.89307700 | -0.28966800 | 0.15887500  |
| C     | -3.88622700 | 0.49488000  | -1.14384200 | P     | -2.40786600 | -0.34975400 | 1.18597600  |
| C     | -4.88157200 | -1.24208300 | 0.20238800  | C     | -3.83013400 | -0.36272900 | -0.02873000 |
| C     | -4.97324800 | 0.44431500  | -2.01093600 | C     | -3.86221500 | 0.46465400  | -1.15818900 |
| H     | -3.07281700 | 1.18675500  | -1.33189800 | C     | -4.90242100 | -1.22570700 | 0.21314100  |
| C     | -5.97470800 | -1.29082900 | -0.66504600 | C     | -4.94902800 | 0.42776000  | -2.02698200 |
| H     | -4.84140100 | -1.90357500 | 1.06177300  | H     | -3.03175200 | 1.13297500  | -1.35701100 |
| C     | -6.02095700 | -0.44809500 | -1.77197000 | C     | -5.99610300 | -1.26018500 | -0.65509500 |
| H     | -5.00480600 | 1.09847800  | -2.87575400 | H     | -4.88088200 | -1.87583400 | 1.08191200  |
| H     | -6.78337900 | -1.98896500 | -0.47740400 | C     | -6.01987100 | -0.43394500 | -1.77562500 |
| H     | -6.86661800 | -0.48627900 | -2.44994000 | H     | -4.96260100 | 1.06867500  | -2.90207800 |
| H     | 1.40979700  | -3.05615400 | 2.31248800  | H     | -6.82225300 | -1.93470500 | -0.45765600 |
| N     | 1.72146300  | -0.45163500 | 2.15295300  | H     | -6.86523400 | -0.46154600 | -2.45439900 |
| C     | 0.85715700  | -0.77918000 | 3.28038800  | N     | 1.73209500  | -0.47645300 | 2.15183100  |
| H     | 0.42016500  | 0.15000900  | 3.64805600  | C     | 2.58756700  | 0.68937500  | 2.38458100  |
| H     | 0.04797300  | -1.42936100 | 2.96049100  | H     | 1.98428200  | 1.59012500  | 2.49678300  |
| H     | 1.42438200  | -1.24410600 | 4.09579800  | H     | 3.14084800  | 0.51583600  | 3.31420900  |
| C     | 2.58842800  | 0.70611300  | 2.37624000  | H     | 3.29199200  | 0.82008000  | 1.57073000  |
| H     | 1.99611600  | 1.61589800  | 2.47314900  | C     | 0.89919200  | -0.84111400 | 3.29325000  |
| H     | 3.13772200  | 0.53759900  | 3.31034600  | H     | 0.47270500  | 0.07539900  | 3.70191600  |
| H     | 3.29686600  | 0.81937500  | 1.56299300  | H     | 0.08525100  | -1.48749300 | 2.97753600  |
| H     | -2.86440200 | 1.98440100  | 2.19907400  | H     | 1.49065800  | -1.32727100 | 4.07721100  |
| C     | -0.61258900 | -1.30175900 | -0.75163300 | C     | -0.62629900 | -1.29368700 | -0.77010300 |
| N     | -0.42464900 | -2.16769800 | -1.50974600 | N     | -0.46701500 | -2.14408700 | -1.55409700 |
| ***** |             |             |             | ***** |             |             |             |

| 1-A-13-D-P1234-DCM |            |             |             | 1-A-13-D-P1234-DMSO |            |             |             |
|--------------------|------------|-------------|-------------|---------------------|------------|-------------|-------------|
| C                  | 2.35150800 | -3.62497900 | 0.39276800  | C                   | 2.35700400 | -3.62518400 | 0.39786200  |
| C                  | 1.82481600 | -2.72931200 | 1.31462500  | C                   | 1.83075700 | -2.72810000 | 1.31869100  |
| H                  | 1.46288400 | -3.09881700 | 2.26309000  | H                   | 1.47634100 | -3.09577000 | 2.27066500  |
| C                  | 3.01705900 | -3.14938100 | -0.72832200 | C                   | 3.01735200 | -3.15154100 | -0.72760000 |
| H                  | 3.51201100 | -3.84074800 | -1.40028300 | H                   | 3.51512000 | -3.84358300 | -1.39673500 |
| C                  | 1.91579600 | -1.33576100 | 1.09024400  | C                   | 1.91819900 | -1.33499800 | 1.09068000  |
| C                  | 3.04821300 | -1.76708300 | -1.03307100 | C                   | 3.04344900 | -1.77079400 | -1.03632500 |
| C                  | 2.33465300 | -0.85314000 | -0.21123800 | C                   | 2.33180400 | -0.85479600 | -0.21341200 |
| C                  | 3.76172500 | -1.27961900 | -2.16615100 | C                   | 3.75308000 | -1.28535800 | -2.17329100 |
| H                  | 4.30464800 | -1.98232800 | -2.78720000 | H                   | 4.29638000 | -1.98920400 | -2.79272600 |
| C                  | 3.80549100 | 0.06307100  | -2.41432100 | C                   | 3.79537300 | 0.05647500  | -2.42567200 |
| H                  | 4.43180800 | 0.45528000  | -3.20820600 | H                   | 4.42001600 | 0.44715800  | -3.22154700 |
| C                  | 3.00015900 | 0.97572000  | -1.67450900 | C                   | 2.99265200 | 0.97085900  | -1.68441800 |
| C                  | 2.09963300 | 0.48198000  | -0.68710700 | C                   | 2.09551100 | 0.47883700  | -0.69172200 |
| C                  | 3.09770500 | 2.38364300  | -1.88474700 | C                   | 3.09149900 | 2.37761400  | -1.89651300 |
| H                  | 3.80102300 | 2.75857100  | -2.61921600 | H                   | 3.79439100 | 2.75042700  | -2.63241800 |
| C                  | 2.35670500 | 3.23904100  | -1.11468000 | C                   | 2.35438800 | 3.23617100  | -1.12453100 |
| H                  | 2.49736600 | 4.31155500  | -1.20352400 | H                   | 2.49841500 | 4.30814100  | -1.21383500 |
| C                  | 1.32906100 | 2.76532000  | -0.24977000 | C                   | 1.32930300 | 2.76521400  | -0.25650500 |
| C                  | 1.06638500 | 1.36449100  | -0.17456500 | C                   | 1.06526900 | 1.36421400  | -0.17770300 |
| C                  | 0.51834000 | 3.68260800  | 0.49220200  | C                   | 0.52219200 | 3.68487000  | 0.48709500  |
| H                  | 0.77958400 | 4.73552700  | 0.46789000  | H                   | 0.78697400 | 4.73686300  | 0.46247100  |

|       |             |             |             |       |             |             |             |
|-------|-------------|-------------|-------------|-------|-------------|-------------|-------------|
| C     | -0.55806900 | 3.25293700  | 1.21327300  | C     | -0.55296100 | 3.25875900  | 1.21159900  |
| H     | -1.14963200 | 3.95456200  | 1.79203900  | H     | -1.14055100 | 3.96171400  | 1.79263300  |
| C     | -0.99358800 | 1.88944700  | 1.12397900  | C     | -0.99142700 | 1.89564500  | 1.12395900  |
| C     | -0.20351800 | 0.94170800  | 0.34590500  | C     | -0.20299800 | 0.94503100  | 0.34737200  |
| C     | -2.17375900 | 1.37495100  | 1.63685000  | C     | -2.17188100 | 1.38489900  | 1.63894000  |
| H     | -2.86717200 | 1.93909800  | 2.24617400  | H     | -2.86110100 | 1.95114200  | 2.25110200  |
| H     | 2.31364900  | -4.68727900 | 0.59701200  | H     | 2.32629900  | -4.68659800 | 0.60787900  |
| C     | -0.89453100 | -0.29009300 | 0.16640600  | C     | -0.89695800 | -0.28675500 | 0.17252900  |
| P     | -2.40733200 | -0.35303300 | 1.19975100  | P     | -2.40821300 | -0.34472200 | 1.21012100  |
| C     | -3.82796600 | -0.36316900 | -0.01815100 | C     | -3.82760300 | -0.36006300 | -0.00948300 |
| C     | -3.87521000 | 0.48982800  | -1.12875300 | C     | -3.89372900 | 0.51529500  | -1.10203700 |
| C     | -4.88416100 | -1.25283300 | 0.20010700  | C     | -4.86273400 | -1.27955100 | 0.18668000  |
| C     | -4.95915000 | 0.45170200  | -2.00187200 | C     | -4.97437500 | 0.46948200  | -1.97915900 |
| H     | -3.05944700 | 1.18141500  | -1.30922600 | H     | -3.09593500 | 1.23203300  | -1.26446800 |
| C     | -5.97484600 | -1.28990100 | -0.67279600 | C     | -5.94982100 | -1.32532900 | -0.69073000 |
| H     | -4.85433000 | -1.92122000 | 1.05467700  | H     | -4.82035700 | -1.96369400 | 1.02814700  |
| C     | -6.01296500 | -0.43811100 | -1.77413800 | C     | -6.00625400 | -0.45144800 | -1.77399600 |
| H     | -4.98482900 | 1.11406100  | -2.86051600 | H     | -5.01535800 | 1.15045700  | -2.82248600 |
| H     | -6.78794500 | -1.98467200 | -0.49273700 | H     | -6.74639200 | -2.04288800 | -0.52730900 |
| H     | -6.85632700 | -0.46633000 | -2.45519800 | H     | -6.84736300 | -0.48530000 | -2.45748500 |
| N     | 1.74363100  | -0.48886200 | 2.15152000  | N     | 1.74871900  | -0.48663600 | 2.15104500  |
| C     | 0.94413200  | -0.87668700 | 3.31084800  | C     | 2.60257800  | 0.68339000  | 2.37743200  |
| H     | 0.54068500  | 0.03238200  | 3.75709400  | H     | 1.99461100  | 1.57914200  | 2.50471400  |
| H     | 0.11773100  | -1.51280400 | 3.00638800  | H     | 3.16555400  | 0.50685700  | 3.29903100  |
| H     | 1.55788200  | -1.38557400 | 4.06122200  | H     | 3.29725700  | 0.82053600  | 1.55666100  |
| C     | 2.59614000  | 0.68073500  | 2.38243100  | C     | 0.95990600  | -0.87719700 | 3.31724500  |
| H     | 1.98824800  | 1.57702700  | 2.50603300  | H     | 0.56385600  | 0.03118300  | 3.77129900  |
| H     | 3.15559300  | 0.50460200  | 3.30668900  | H     | 0.13003400  | -1.51182100 | 3.01897800  |
| H     | 3.29432200  | 0.81837200  | 1.56460700  | H     | 1.58064500  | -1.38976100 | 4.05874000  |
| C     | -0.64933700 | -1.27954300 | -0.77878800 | C     | -0.66255300 | -1.27386700 | -0.77524000 |
| N     | -0.52224500 | -2.11865400 | -1.58338000 | N     | -0.54840200 | -2.11148700 | -1.58470500 |
| ***** |             |             |             | ***** |             |             |             |

| 1-A-13-D-P1234-n-hexane |            |             |             | 3-A-12-D-P1234 |             |             |             |
|-------------------------|------------|-------------|-------------|----------------|-------------|-------------|-------------|
| C                       | 2.33280300 | -3.62531400 | 0.41721600  | C              | 3.55270600  | 2.76954400  | 0.58410100  |
| C                       | 1.81183700 | -2.72084500 | 1.33383400  | C              | 2.57822800  | 2.39748300  | -0.39723600 |
| H                       | 1.43988600 | -3.08108500 | 2.28234900  | C              | 4.07339700  | 1.80998600  | 1.40001800  |
| C                       | 3.00180100 | -3.15945800 | -0.70435600 | H              | 4.83742600  | 2.07761000  | 2.12166600  |
| H                       | 3.48297400 | -3.85816700 | -1.37896500 | C              | 2.13176700  | 1.05330600  | -0.43778900 |
| C                       | 1.90871100 | -1.33001100 | 1.09854500  | H              | 1.42172000  | 0.75842900  | -1.18933100 |
| C                       | 3.04747300 | -1.77687200 | -1.01543100 | C              | 3.66708700  | 0.44175400  | 1.32650800  |
| C                       | 2.33599900 | -0.85714400 | -0.20288100 | C              | 2.59434200  | 0.07939200  | 0.45087500  |
| C                       | 3.76685100 | -1.29818200 | -2.14730500 | C              | 4.36597200  | -0.56268600 | 2.02670200  |
| H                       | 4.30494600 | -2.00545200 | -2.76745700 | H              | 5.16847200  | -0.29068600 | 2.70248300  |
| C                       | 3.81869400 | 0.04404100  | -2.39722000 | C              | 4.08132300  | -1.88151400 | 1.76472000  |
| H                       | 4.44884900 | 0.43044000  | -3.19114200 | H              | 4.67914200  | -2.66109400 | 2.22569400  |
| C                       | 3.01416700 | 0.96314700  | -1.66592500 | C              | 3.01627100  | -2.27987000 | 0.90670900  |
| C                       | 2.10632700 | 0.47814700  | -0.68490800 | C              | 2.13466900  | -1.30520600 | 0.37656400  |
| C                       | 3.11525700 | 2.37173800  | -1.88324800 | C              | 2.84561800  | -3.65609200 | 0.57369600  |
| H                       | 3.81984200 | 2.74245900  | -2.61876900 | H              | 3.53190000  | -4.38843500 | 0.98349800  |
| C                       | 2.37238500 | 3.22905600  | -1.12139700 | C              | 1.86648000  | -4.01721100 | -0.30399700 |
| H                       | 2.51099100 | 4.30142500  | -1.21685100 | H              | 1.77984900  | -5.04716000 | -0.63400800 |
| C                       | 1.33877200 | 2.76110000  | -0.25695900 | C              | 0.89305800  | -3.08351300 | -0.75882500 |
| C                       | 1.07147100 | 1.36269500  | -0.17954300 | C              | 0.92758900  | -1.73234000 | -0.28959500 |
| C                       | 0.52691600 | 3.68254800  | 0.47735400  | C              | -0.14413100 | -3.51346700 | -1.64067900 |

|       |             |             |             |       |             |             |             |
|-------|-------------|-------------|-------------|-------|-------------|-------------|-------------|
| H     | 0.78672200  | 4.73566400  | 0.44727100  | H     | -0.11298400 | -4.52925600 | -2.01809200 |
| C     | -0.55399400 | 3.25543700  | 1.19440900  | C     | -1.16538600 | -2.67066200 | -1.99329600 |
| H     | -1.14904700 | 3.96093000  | 1.76507200  | H     | -1.94074300 | -3.00189400 | -2.67590200 |
| C     | -0.99121100 | 1.89342000  | 1.11072100  | C     | -1.28329600 | -1.38847200 | -1.39528400 |
| C     | -0.20329400 | 0.94209100  | 0.33632600  | C     | -0.27037900 | -0.92599500 | -0.46239200 |
| C     | -2.17389200 | 1.38084500  | 1.62278500  | C     | -2.37119700 | -0.50116200 | -1.53176300 |
| H     | -2.87302300 | 1.94887900  | 2.22165900  | H     | 3.88163000  | 3.79390900  | 0.67937800  |
| H     | 2.27932500  | -4.68700400 | 0.62139700  | C     | -0.64938200 | 0.24001400  | 0.20561700  |
| C     | -0.89312500 | -0.28823700 | 0.15829000  | P     | -2.16106700 | 0.95149900  | -0.45335200 |
| P     | -2.40796300 | -0.34601200 | 1.18493900  | C     | -3.44199700 | 0.77899000  | 0.90163200  |
| C     | -3.83049100 | -0.36123400 | -0.02922300 | C     | -3.40278300 | -0.25258800 | 1.84714000  |
| C     | -3.86381700 | 0.46606800  | -1.15857300 | C     | -4.47971400 | 1.71356300  | 0.95656900  |
| C     | -4.90132400 | -1.22572800 | 0.21300900  | C     | -4.38746600 | -0.34613900 | 2.82704600  |
| C     | -4.95070700 | 0.42749500  | -2.02705700 | H     | -2.59907200 | -0.97959200 | 1.80971300  |
| H     | -3.03424800 | 1.13545100  | -1.35743300 | C     | -5.47057100 | 1.61674800  | 1.93469000  |
| C     | -5.99500800 | -1.26186200 | -0.65499900 | H     | -4.51520400 | 2.51706400  | 0.22781300  |
| H     | -4.87837100 | -1.87571900 | 1.08183200  | C     | -5.42437300 | 0.58783800  | 2.87203100  |
| C     | -6.02014500 | -0.43574100 | -1.77548700 | H     | -4.35039800 | -1.15043200 | 3.55432300  |
| H     | -4.96534400 | 1.06826200  | -2.90225400 | H     | -6.27523800 | 2.34358500  | 1.96296700  |
| H     | -6.82011500 | -1.93764800 | -0.45746400 | H     | -6.19228400 | 0.51096500  | 3.63404000  |
| H     | -6.86556800 | -0.46465800 | -2.45415400 | H     | -0.08657700 | 0.71607400  | 0.99338400  |
| N     | 1.73044000  | -0.47245000 | 2.15195000  | N     | 2.08603900  | 3.30928700  | -1.28097700 |
| C     | 2.58747500  | 0.69216800  | 2.38354000  | C     | 1.01231000  | 2.96850700  | -2.22348100 |
| H     | 1.98577800  | 1.59420300  | 2.49388900  | H     | 0.59275000  | 3.88996800  | -2.61968400 |
| H     | 3.14051000  | 0.51916500  | 3.31364800  | H     | 1.40115300  | 2.37386000  | -3.05613100 |
| H     | 3.29227600  | 0.82073200  | 1.56962600  | H     | 0.21670200  | 2.41777200  | -1.72450400 |
| C     | 0.89193400  | -0.83142500 | 3.29073300  | C     | 2.62548500  | 4.66661200  | -1.33259100 |
| H     | 0.46308500  | 0.08702300  | 3.69264500  | H     | 3.71616300  | 4.64989000  | -1.37090600 |
| H     | 0.07911400  | -1.47858700 | 2.97378000  | H     | 2.25623300  | 5.15839800  | -2.22880100 |
| H     | 1.47918400  | -1.31409700 | 4.08023100  | H     | 2.30971800  | 5.24955000  | -0.46126700 |
| C     | -0.62351300 | -1.29546700 | -0.76719000 | C     | -3.45029400 | -0.68407800 | -2.39988000 |
| N     | -0.45878700 | -2.14853400 | -1.54671600 | N     | -4.35123100 | -0.82607000 | -3.12515400 |
| ***** |             |             |             | ***** |             |             |             |

| 3-A-12-D-P1234-CCl4 |            |             |             | 3-A-12-D-P1234-DCM |            |             |             |
|---------------------|------------|-------------|-------------|--------------------|------------|-------------|-------------|
| C                   | 3.55757600 | 2.74079800  | 0.60613800  | C                  | 3.56590200 | 2.71384500  | 0.62301600  |
| C                   | 2.60972600 | 2.37637200  | -0.40572600 | C                  | 2.63975600 | 2.35618800  | -0.41270000 |
| C                   | 4.04886200 | 1.77870000  | 1.43533900  | C                  | 4.02972700 | 1.75036200  | 1.46459200  |
| H                   | 4.79608500 | 2.04046200  | 2.17610000  | H                  | 4.76243400 | 2.00662900  | 2.22124300  |
| C                   | 2.14889900 | 1.03594100  | -0.45469700 | C                  | 2.16385700 | 1.02023500  | -0.46759500 |
| H                   | 1.45945700 | 0.74697700  | -1.22775500 | H                  | 1.49364900 | 0.73598500  | -1.25943400 |
| C                   | 3.63456500 | 0.41284100  | 1.34930400  | C                  | 3.60627100 | 0.38729900  | 1.36933300  |
| C                   | 2.58004900 | 0.06049900  | 0.44793300  | C                  | 2.56759700 | 0.04369600  | 0.44619400  |
| C                   | 4.31195500 | -0.59707100 | 2.06174800  | C                  | 4.26387700 | -0.62671800 | 2.09313800  |
| H                   | 5.10233600 | -0.33024100 | 2.75344600  | H                  | 5.04393200 | -0.36383900 | 2.79769300  |
| C                   | 4.02642600 | -1.91505100 | 1.79353100  | C                  | 3.97721100 | -1.94439300 | 1.82079600  |
| H                   | 4.61174200 | -2.69807800 | 2.26391500  | H                  | 4.55155000 | -2.73025500 | 2.29924800  |
| C                   | 2.97330000 | -2.30362900 | 0.91769400  | C                  | 2.93534500 | -2.32461700 | 0.92955700  |
| C                   | 2.11003700 | -1.32023000 | 0.36944500  | C                  | 2.08864200 | -1.33375300 | 0.36434900  |
| C                   | 2.79286600 | -3.67932400 | 0.58648300  | C                  | 2.74711800 | -3.70011400 | 0.60027600  |
| H                   | 3.46971100 | -4.41570100 | 1.00464000  | H                  | 3.41635800 | -4.43902700 | 1.02599200  |
| C                   | 1.81631900 | -4.03753900 | -0.29557700 | C                  | 1.77351200 | -4.05671300 | -0.28585300 |
| H                   | 1.72208200 | -5.06845500 | -0.62036500 | H                  | 1.67362900 | -5.08832900 | -0.60649900 |
| C                   | 0.85362000 | -3.09593400 | -0.75790500 | C                  | 0.81993900 | -3.10855200 | -0.75514700 |
| C                   | 0.90544400 | -1.73966500 | -0.30403200 | C                  | 0.88671600 | -1.74733200 | -0.31536900 |

|       |             |             |             |       |             |             |             |
|-------|-------------|-------------|-------------|-------|-------------|-------------|-------------|
| C     | -0.18993000 | -3.52365100 | -1.63179600 | C     | -0.22842700 | -3.53489100 | -1.62171600 |
| H     | -0.16899500 | -4.54335400 | -1.99955700 | H     | -0.21578800 | -4.55789200 | -1.98085000 |
| C     | -1.20860700 | -2.67703200 | -1.98839000 | C     | -1.24562000 | -2.68516800 | -1.98224200 |
| H     | -1.98940100 | -3.01332300 | -2.66235000 | H     | -2.03065000 | -3.02618100 | -2.64904700 |
| C     | -1.31195000 | -1.38912900 | -1.40326200 | C     | -1.33645100 | -1.39274100 | -1.40917500 |
| C     | -0.28484500 | -0.92183800 | -0.48748700 | C     | -0.29708900 | -0.92015500 | -0.50942600 |
| C     | -2.39526600 | -0.49142400 | -1.53960900 | C     | -2.41720600 | -0.48663100 | -1.54518500 |
| H     | 3.89401200  | 3.76175800  | 0.70788300  | H     | 3.90945400  | 3.73170600  | 0.72952900  |
| C     | -0.64645300 | 0.25771400  | 0.16458500  | C     | -0.64352100 | 0.27188100  | 0.12691100  |
| P     | -2.16100400 | 0.97525900  | -0.48239400 | P     | -2.16017600 | 0.99455900  | -0.51040100 |
| C     | -3.42072200 | 0.81488200  | 0.89529100  | C     | -3.40295800 | 0.85064400  | 0.88543700  |
| C     | -3.38693600 | -0.22605500 | 1.83155000  | C     | -3.38134700 | -0.19893500 | 1.81337100  |
| C     | -4.43688500 | 1.77148000  | 0.97930600  | C     | -4.39459400 | 1.83111800  | 0.99330700  |
| C     | -4.35456800 | -0.30747100 | 2.82983700  | C     | -4.33657100 | -0.26646200 | 2.82506200  |
| H     | -2.60038200 | -0.97040900 | 1.77384200  | H     | -2.61275000 | -0.96075400 | 1.74118000  |
| C     | -5.41065000 | 1.68810100  | 1.97656400  | C     | -5.35577900 | 1.76281300  | 2.00477700  |
| H     | -4.46899500 | 2.58344100  | 0.25971200  | H     | -4.41680600 | 2.65234700  | 0.28383700  |
| C     | -5.36952200 | 0.64936900  | 2.90374600  | C     | -5.32713500 | 0.71445700  | 2.92205300  |
| H     | -4.32096800 | -1.11882400 | 3.54930700  | H     | -4.31097400 | -1.08342900 | 3.53833300  |
| H     | -6.19730700 | 2.43312100  | 2.02771500  | H     | -6.12130300 | 2.52784100  | 2.07560300  |
| H     | -6.12356900 | 0.58280900  | 3.68036200  | H     | -6.07013500 | 0.66014200  | 3.71003100  |
| H     | -0.06883400 | 0.74357800  | 0.93522600  | H     | -0.05264300 | 0.76801900  | 0.88059400  |
| N     | 2.16055800  | 3.28876500  | -1.30637800 | N     | 2.22963500  | 3.26896000  | -1.32712900 |
| C     | 1.13650100  | 2.94707300  | -2.30144900 | C     | 1.23244400  | 2.93793300  | -2.35116600 |
| H     | 0.76555400  | 3.86520300  | -2.74837200 | H     | 0.88512400  | 3.85969200  | -2.80873900 |
| H     | 1.55950300  | 2.31823200  | -3.09040800 | H     | 1.67312400  | 2.30451700  | -3.12627400 |
| H     | 0.30057800  | 2.42853100  | -1.83417600 | H     | 0.37885200  | 2.42739700  | -1.90724100 |
| C     | 2.70009700  | 4.64960900  | -1.32785800 | C     | 2.79019600  | 4.62333300  | -1.34298100 |
| H     | 3.79089700  | 4.63281900  | -1.33983700 | H     | 3.87941000  | 4.58872900  | -1.31399000 |
| H     | 2.35174600  | 5.15172900  | -2.22585600 | H     | 2.48256100  | 5.11859500  | -2.25899800 |
| H     | 2.36063000  | 5.21703200  | -0.45641300 | H     | 2.42504200  | 5.20253700  | -0.49056500 |
| C     | -3.48383100 | -0.67446700 | -2.39007200 | C     | -3.51845400 | -0.67420300 | -2.37143000 |
| N     | -4.39874100 | -0.81439600 | -3.10147100 | N     | -4.45237900 | -0.81572700 | -3.06126200 |
| ***** |             |             |             | ***** |             |             |             |

| 3-A-12-D-P1234-DMSO |            |             |             | 3-A-12-D-P1234-N-HEXANE |            |             |             |
|---------------------|------------|-------------|-------------|-------------------------|------------|-------------|-------------|
| C                   | 3.56608500 | 2.70783600  | 0.62330000  | C                       | 3.55504900 | 2.74721400  | 0.60143900  |
| C                   | 2.64819100 | 2.34952200  | -0.41997600 | C                       | 2.60293900 | 2.38064200  | -0.40529200 |
| C                   | 4.02112400 | 1.74619400  | 1.47108600  | C                       | 4.05213200 | 1.78598700  | 1.42852400  |
| H                   | 4.74832900 | 2.00281700  | 2.23278000  | H                       | 4.80219300 | 2.04937900  | 2.16590100  |
| C                   | 2.16843000 | 1.01463100  | -0.47463000 | C                       | 2.14549700 | 1.03922400  | -0.45251500 |
| H                   | 1.50540300 | 0.72975000  | -1.27240900 | H                       | 1.45233300 | 0.74874700  | -1.22160500 |
| C                   | 3.59587000 | 0.38354500  | 1.37519600  | C                       | 3.64007000 | 0.41942700  | 1.34495000  |
| C                   | 2.56340300 | 0.04000500  | 0.44483500  | C                       | 2.58252000 | 0.06456200  | 0.44813200  |
| C                   | 4.24731900 | -0.62960500 | 2.10513700  | C                       | 4.32173400 | -0.58904000 | 2.05554000  |
| H                   | 5.02337900 | -0.36589300 | 2.81368500  | H                       | 5.11413000 | -0.32080000 | 2.74442500  |
| C                   | 3.96163300 | -1.94812200 | 1.83413500  | C                       | 4.03687700 | -1.90735800 | 1.78882400  |
| H                   | 4.53303400 | -2.73338800 | 2.31681200  | H                       | 4.62470800 | -2.68939700 | 2.25783800  |
| C                   | 2.92433000 | -2.32836900 | 0.93836600  | C                       | 2.98168900 | -2.29837800 | 0.91632100  |
| C                   | 2.08260000 | -1.33697000 | 0.36473200  | C                       | 2.11480000 | -1.31703400 | 0.37095600  |
| C                   | 2.73482200 | -3.70479700 | 0.61304000  | C                       | 2.80334800 | -3.67435700 | 0.58540400  |
| H                   | 3.40226200 | -4.44273300 | 1.04319200  | H                       | 3.48206400 | -4.40968900 | 1.00238100  |
| C                   | 1.76265900 | -4.06398600 | -0.27362600 | C                       | 1.82634000 | -4.03373300 | -0.29564100 |
| H                   | 1.66194700 | -5.09662700 | -0.59056100 | H                       | 1.73367200 | -5.06466900 | -0.62083600 |
| C                   | 0.81128400 | -3.11559900 | -0.74754600 | C                       | 0.86145000 | -3.09401200 | -0.75699200 |

|       |             |             |             |       |             |             |             |
|-------|-------------|-------------|-------------|-------|-------------|-------------|-------------|
| C     | 0.88203500  | -1.75135300 | -0.31607500 | C     | 0.90984600  | -1.73843800 | -0.30098400 |
| C     | -0.23825600 | -3.54468900 | -1.61023700 | C     | -0.18095800 | -3.52278200 | -1.63205700 |
| H     | -0.22728700 | -4.56960800 | -1.96402500 | H     | -0.15798600 | -4.54196600 | -2.00108000 |
| C     | -1.25619400 | -2.69586300 | -1.97395300 | C     | -1.20031100 | -2.67727800 | -1.98825200 |
| H     | -2.04221600 | -3.04097300 | -2.63757000 | H     | -1.98009800 | -3.01320200 | -2.66353500 |
| C     | -1.34396200 | -1.40076200 | -1.40829700 | C     | -1.30655300 | -1.39010100 | -1.40138200 |
| C     | -0.30041500 | -0.92265600 | -0.51599000 | C     | -0.28201900 | -0.92302700 | -0.48277200 |
| C     | -2.42534300 | -0.49348200 | -1.54562100 | C     | -2.39081200 | -0.49452900 | -1.53812500 |
| H     | 3.91065000  | 3.72528400  | 0.72962000  | H     | 3.88964200  | 3.76897100  | 0.70174200  |
| C     | -0.64256700 | 0.27520900  | 0.11129200  | C     | -0.64698500 | 0.25427700  | 0.17173400  |
| P     | -2.16018800 | 0.99704700  | -0.52515800 | P     | -2.16111500 | 0.97019600  | -0.47777100 |
| C     | -3.39693600 | 0.86507900  | 0.87738300  | C     | -3.42434800 | 0.80802800  | 0.89623400  |
| C     | -3.38976400 | -0.19209800 | 1.79731800  | C     | -3.38982200 | -0.23153400 | 1.83383000  |
| C     | -4.36876100 | 1.86376600  | 0.99977100  | C     | -4.44370200 | 1.76144700  | 0.97587900  |
| C     | -4.33975400 | -0.24963900 | 2.81465600  | C     | -4.36001000 | -0.31459400 | 2.82939600  |
| H     | -2.63548100 | -0.96729700 | 1.71603800  | H     | -2.60077600 | -0.97344000 | 1.77899800  |
| C     | -5.32438700 | 1.80625800  | 2.01760200  | C     | -5.42001900 | 1.67623700  | 1.97031800  |
| H     | -4.37918800 | 2.69181500  | 0.29799100  | H     | -4.47633500 | 2.57197800  | 0.25471700  |
| C     | -5.31041800 | 0.74989800  | 2.92613300  | C     | -5.37816700 | 0.63900700  | 2.89904500  |
| H     | -4.32462700 | -1.07184500 | 3.52211500  | H     | -4.32602300 | -1.12497500 | 3.54996500  |
| H     | -6.07328700 | 2.58630000  | 2.10065300  | H     | -6.20943300 | 2.41858400  | 2.01797900  |
| H     | -6.04844400 | 0.70419300  | 3.71923700  | H     | -6.13435600 | 0.57098400  | 3.67346800  |
| H     | -0.04729300 | 0.77835200  | 0.85675400  | H     | -0.07207000 | 0.73887600  | 0.94522500  |
| N     | 2.25081600  | 3.26039600  | -1.34041600 | N     | 2.14566600  | 3.29241400  | -1.30337700 |
| C     | 1.26192700  | 2.93124800  | -2.37241200 | C     | 1.11533900  | 2.94844800  | -2.29141700 |
| H     | 0.92103700  | 3.85368800  | -2.83328300 | H     | 0.73919000  | 3.86587300  | -2.73564500 |
| H     | 1.70830800  | 2.29656800  | -3.14309300 | H     | 1.53398600  | 2.32063500  | -3.08359900 |
| H     | 0.40378200  | 2.42268200  | -1.93490500 | H     | 0.28358500  | 2.42823600  | -1.81859700 |
| C     | 2.81711000  | 4.61296100  | -1.35645400 | C     | 2.68151100  | 4.65423800  | -1.32738600 |
| H     | 3.90511900  | 4.57392100  | -1.30772200 | H     | 3.77240600  | 4.64058400  | -1.34628900 |
| H     | 2.52760200  | 5.10176500  | -2.28168400 | H     | 2.32620300  | 5.15629300  | -2.22280000 |
| H     | 2.43834500  | 5.19896000  | -0.51484200 | H     | 2.34650300  | 5.22081100  | -0.45349400 |
| C     | -3.53327200 | -0.68760500 | -2.35866200 | C     | -3.47744700 | -0.67790800 | -2.39210500 |
| N     | -4.47671700 | -0.83422100 | -3.03593200 | N     | -4.38949100 | -0.81849200 | -3.10636900 |
| ***** |             |             |             | ***** |             |             |             |

|                |             |             |             |                     |             |             |             |
|----------------|-------------|-------------|-------------|---------------------|-------------|-------------|-------------|
| 1-A-11-D-P1234 |             |             |             | 1-A-11-D-P1234-CCI4 |             |             |             |
| C              | -3.27466800 | -2.01121000 | -0.45772500 | C                   | -3.38332100 | -1.94567800 | -0.42738700 |
| C              | -2.32270800 | -1.47801300 | -1.37770900 | C                   | -2.38843400 | -1.46421600 | -1.33323400 |
| H              | -2.01208700 | -2.04888000 | -2.24019700 | H                   | -2.10224400 | -2.04978100 | -2.19415100 |
| C              | -3.75814400 | -1.15717000 | 0.55948200  | C                   | -3.81961000 | -1.07073600 | 0.59567700  |
| H              | -4.54336400 | -1.49032900 | 1.22399500  | H                   | -4.63123000 | -1.35900600 | 1.24894100  |
| C              | -1.77173600 | -0.24941900 | -1.16183000 | C                   | -1.77716000 | -0.26495300 | -1.11399500 |
| H              | -1.05303500 | 0.13463100  | -1.86855700 | C                   | -3.24188100 | 0.18861100  | 0.78636300  |
| C              | -3.24808200 | 0.13301500  | 0.74530300  | C                   | -2.10609700 | 0.57004700  | 0.00436000  |
| C              | -2.12755400 | 0.55906500  | -0.03217200 | C                   | -3.79005000 | 1.10937400  | 1.73478400  |
| C              | -3.83428500 | 1.03027800  | 1.69175500  | H                   | -4.63684700 | 0.80421900  | 2.33870200  |
| H              | -4.67381100 | 0.69530200  | 2.29016500  | C                   | -3.28803200 | 2.37058600  | 1.81057600  |
| C              | -3.37245700 | 2.30650500  | 1.77609000  | H                   | -3.75074100 | 3.10744400  | 2.45838400  |
| H              | -3.86312900 | 3.02521700  | 2.42396000  | C                   | -2.13392000 | 2.76365100  | 1.06250600  |
| C              | -2.21989100 | 2.73725400  | 1.04751400  | C                   | -1.42869100 | 1.80824400  | 0.28650800  |
| C              | -1.48227800 | 1.81048600  | 0.27152600  | C                   | -1.71165000 | 4.12633800  | 1.04892600  |
| C              | -1.82222400 | 4.10860800  | 1.06195500  | H                   | -2.26270500 | 4.85360600  | 1.63429000  |
| H              | -2.39628900 | 4.81719000  | 1.64827200  | C                   | -0.67710500 | 4.51231700  | 0.24373400  |
| C              | -0.77781100 | 4.52261800  | 0.28712100  | H                   | -0.41369300 | 5.56200400  | 0.16153100  |

|       |             |             |             |       |             |             |             |
|-------|-------------|-------------|-------------|-------|-------------|-------------|-------------|
| H     | -0.52779200 | 5.57729500  | 0.22970700  | C     | 0.12694600  | 3.56136800  | -0.45120500 |
| C     | 0.05767000  | 3.59707800  | -0.40773600 | C     | -0.14603600 | 2.17107800  | -0.29003100 |
| C     | -0.19770300 | 2.20102900  | -0.27825000 | C     | 1.23045000  | 3.98677400  | -1.25360700 |
| C     | 1.17191000  | 4.05370800  | -1.17618500 | H     | 1.37673900  | 5.05106800  | -1.40426200 |
| H     | 1.30780500  | 5.12244400  | -1.30230500 | C     | 2.07767300  | 3.08115500  | -1.82694400 |
| C     | 2.04301900  | 3.16957700  | -1.74748300 | H     | 2.89174700  | 3.41339200  | -2.46246400 |
| H     | 2.86677600  | 3.52512800  | -2.35739200 | C     | 1.97020500  | 1.68965100  | -1.51463900 |
| C     | 1.94724500  | 1.77128400  | -1.46913600 | C     | 0.88891000  | 1.23957900  | -0.65160000 |
| C     | 0.85567700  | 1.28744400  | -0.63969600 | C     | 2.86449100  | 0.69102500  | -1.88418400 |
| C     | 2.86234900  | 0.79198600  | -1.84301400 | H     | 3.70518900  | 0.84421400  | -2.54707100 |
| H     | 3.71310400  | 0.97130700  | -2.48599800 | C     | 1.05934100  | -0.11464600 | -0.25318200 |
| C     | 1.03048800  | -0.07495900 | -0.27455600 | P     | 2.39456800  | -0.90574600 | -1.22264400 |
| P     | 2.39513200  | -0.82492300 | -1.23584900 | C     | 3.69988700  | -1.36454000 | 0.03282800  |
| C     | 3.67465100  | -1.30642700 | 0.03774700  | C     | 4.22653400  | -0.43625300 | 0.94003600  |
| C     | 4.18233300  | -0.39389000 | 0.97072000  | C     | 4.17086400  | -2.68011500 | 0.05325500  |
| C     | 4.14629600  | -2.62140000 | 0.04407800  | C     | 5.20548200  | -0.82165900 | 1.85126800  |
| C     | 5.14284600  | -0.79486600 | 1.89415700  | H     | 3.86665800  | 0.58661100  | 0.92966000  |
| H     | 3.82210300  | 0.62879800  | 0.96932000  | C     | 5.15365500  | -3.06748500 | 0.96687000  |
| C     | 5.11049100  | -3.02420600 | 0.97000800  | H     | 3.76724400  | -3.40434400 | -0.64691400 |
| H     | 3.75721100  | -3.33213500 | -0.67780800 | C     | 5.67166900  | -2.13878800 | 1.86581600  |
| C     | 5.60930300  | -2.11148300 | 1.89520900  | H     | 5.60548700  | -0.09694900 | 2.55237800  |
| H     | 5.52835200  | -0.08235400 | 2.61570100  | H     | 5.51073500  | -4.09162500 | 0.97494200  |
| H     | 5.46866800  | -4.04808500 | 0.96715600  | H     | 6.43438900  | -2.43665700 | 2.57690600  |
| H     | 6.35804200  | -2.42145200 | 2.61603700  | H     | -1.03589100 | 0.07824700  | -1.81839000 |
| N     | -3.72636100 | -3.29464700 | -0.57329900 | N     | -3.91937000 | -3.18938300 | -0.56393400 |
| C     | -3.16540400 | -4.18503400 | -1.58682900 | C     | -4.93136400 | -3.67980700 | 0.37171100  |
| H     | -2.08006500 | -4.26242600 | -1.47746600 | H     | -5.85053000 | -3.09105700 | 0.30204600  |
| H     | -3.59881600 | -5.17496300 | -1.46943000 | H     | -5.16574200 | -4.71243000 | 0.12911700  |
| H     | -3.39210100 | -3.82708200 | -2.59532700 | H     | -4.56105700 | -3.64078300 | 1.39890700  |
| C     | -4.67919800 | -3.84306100 | 0.38851000  | C     | -3.46424300 | -4.08080900 | -1.63043000 |
| H     | -5.61501400 | -3.27751500 | 0.38178400  | H     | -2.38705800 | -4.25097300 | -1.55890800 |
| H     | -4.90265000 | -4.87200500 | 0.11873300  | H     | -3.97421000 | -5.03531400 | -1.53601500 |
| H     | -4.26532400 | -3.83033100 | 1.40138600  | H     | -3.69069500 | -3.66230400 | -2.61506900 |
| C     | 0.38614600  | -0.81767500 | 0.71599900  | C     | 0.43801100  | -0.81153700 | 0.78158000  |
| N     | -0.10552900 | -1.49430000 | 1.52999900  | N     | -0.02251700 | -1.44702400 | 1.64664100  |
| ***** |             |             |             | ***** |             |             |             |

| 1-A-11-D-P1234-DCM |             |             |             | 1-A-11-D-P1234-DMSO |             |             |             |
|--------------------|-------------|-------------|-------------|---------------------|-------------|-------------|-------------|
| C                  | -3.47204400 | -1.89630100 | -0.40386900 | C                   | -3.49882300 | -1.87414200 | -0.40071100 |
| C                  | -2.44299500 | -1.45874300 | -1.29669800 | C                   | -2.46358700 | -1.44654000 | -1.29253200 |
| H                  | -2.18383800 | -2.05060400 | -2.16189400 | H                   | -2.21608600 | -2.03642100 | -2.16248700 |
| C                  | -3.86691600 | -1.00969400 | 0.62802100  | C                   | -3.87811600 | -0.98764900 | 0.63805300  |
| H                  | -4.69187200 | -1.26495600 | 1.27779100  | H                   | -4.70641100 | -1.23397700 | 1.28690700  |
| C                  | -1.78498400 | -0.28503600 | -1.07443300 | C                   | -1.78999800 | -0.28240600 | -1.06679200 |
| H                  | -1.02989100 | 0.02665000  | -1.77896800 | H                   | -1.03301100 | 0.02212800  | -1.77258200 |
| C                  | -3.23555400 | 0.22115400  | 0.82428500  | C                   | -3.23014200 | 0.23318400  | 0.83791900  |
| C                  | -2.09046800 | 0.56948400  | 0.03592900  | C                   | -2.08409000 | 0.57347700  | 0.04565500  |
| C                  | -3.74845100 | 1.15567400  | 1.78084200  | C                   | -3.72911100 | 1.16919100  | 1.80124700  |
| H                  | -4.59828100 | 0.87204300  | 2.39071300  | H                   | -4.57915000 | 0.89122500  | 2.41329600  |
| C                  | -3.21594900 | 2.40430000  | 1.85145100  | C                   | -3.18583600 | 2.41298800  | 1.87354900  |
| H                  | -3.65430300 | 3.15277300  | 2.50261400  | H                   | -3.61492900 | 3.16327100  | 2.52869200  |
| C                  | -2.06662000 | 2.77170700  | 1.08172200  | C                   | -2.03919600 | 2.77407800  | 1.09599100  |
| C                  | -1.38912300 | 1.79619000  | 0.30030300  | C                   | -1.37332800 | 1.79398500  | 0.30801000  |
| C                  | -1.63109600 | 4.12766200  | 1.04409300  | C                   | -1.59802700 | 4.12701100  | 1.05422000  |
| H                  | -2.16407400 | 4.86749200  | 1.63019300  | H                   | -2.12357200 | 4.86976900  | 1.64319300  |

|       |             |             |             |       |             |             |             |
|-------|-------------|-------------|-------------|-------|-------------|-------------|-------------|
| C     | -0.61045400 | 4.49590600  | 0.20907100  | C     | -0.58239300 | 4.49116900  | 0.20920000  |
| H     | -0.34307500 | 5.54251500  | 0.10515500  | H     | -0.31331300 | 5.53685500  | 0.10114200  |
| C     | 0.16890700  | 3.52920100  | -0.48810000 | C     | 0.18701900  | 3.52112100  | -0.49229700 |
| C     | -0.11113700 | 2.14179300  | -0.30188200 | C     | -0.09700600 | 2.13423100  | -0.30242500 |
| C     | 1.25988000  | 3.93538600  | -1.31865300 | C     | 1.27422400  | 3.92204700  | -1.33099800 |
| H     | 1.40757000  | 4.99649600  | -1.48945600 | H     | 1.42349400  | 4.98232900  | -1.50547500 |
| C     | 2.09331400  | 3.01790900  | -1.89229000 | C     | 2.10205200  | 3.00140100  | -1.90715600 |
| H     | 2.89726400  | 3.33562300  | -2.54769100 | H     | 2.90291800  | 3.31523500  | -2.56809200 |
| C     | 1.98471300  | 1.63168200  | -1.55185400 | C     | 1.99146300  | 1.61600600  | -1.56155200 |
| C     | 0.91210100  | 1.20212800  | -0.66572300 | C     | 0.92046600  | 1.19177700  | -0.67016500 |
| C     | 2.86951900  | 0.62443800  | -1.91625500 | C     | 2.87216100  | 0.60621800  | -1.92690500 |
| H     | 3.70113600  | 0.76325000  | -2.59382200 | H     | 3.70073700  | 0.74168400  | -2.60893700 |
| C     | 1.08650900  | -0.14678500 | -0.24551500 | C     | 1.09365300  | -0.15771400 | -0.24816300 |
| P     | 2.40557900  | -0.96055300 | -1.21887900 | P     | 2.40778200  | -0.97682400 | -1.22497300 |
| C     | 3.72678700  | -1.39950400 | 0.02720700  | C     | 3.73019300  | -1.41549200 | 0.01990400  |
| C     | 4.26586000  | -0.45807100 | 0.91428200  | C     | 4.30964200  | -0.46279100 | 0.86912700  |
| C     | 4.19517200  | -2.71628400 | 0.06388800  | C     | 4.15589200  | -2.74527600 | 0.09708100  |
| C     | 5.25433500  | -0.83107200 | 1.82111600  | C     | 5.29469700  | -0.83745000 | 1.77936900  |
| H     | 3.90940300  | 0.56593500  | 0.89242600  | H     | 3.98869800  | 0.57174400  | 0.81405500  |
| C     | 5.18727500  | -3.09148600 | 0.97335400  | C     | 5.14352300  | -3.12239900 | 1.01089800  |
| H     | 3.78382800  | -3.45170200 | -0.61991800 | H     | 3.71586500  | -3.48944800 | -0.55884400 |
| C     | 5.71754800  | -2.14953500 | 1.85177300  | C     | 5.71360700  | -2.16923400 | 1.85179200  |
| H     | 5.66467600  | -0.09599600 | 2.50512100  | H     | 5.73743600  | -0.09336900 | 2.43269500  |
| H     | 5.54225800  | -4.11604100 | 0.99346500  | H     | 5.46514700  | -4.15675600 | 1.06239800  |
| H     | 6.48765900  | -2.43772400 | 2.55867200  | H     | 6.48133600  | -2.45870000 | 2.56065600  |
| N     | -4.07657100 | -3.10116100 | -0.56161600 | N     | -4.12272500 | -3.06649000 | -0.56562600 |
| C     | -3.65524900 | -4.01488400 | -1.62477000 | C     | -5.23111700 | -3.46650100 | 0.30576200  |
| H     | -2.57745600 | -4.18193300 | -1.58246300 | H     | -6.06269300 | -2.76274400 | 0.22455800  |
| H     | -4.15955600 | -4.96737600 | -1.49143100 | H     | -5.57845300 | -4.44933600 | 0.00264900  |
| H     | -3.91487100 | -3.61586800 | -2.60979900 | H     | -4.90544000 | -3.51717800 | 1.34718000  |
| C     | -5.17369800 | -3.51622700 | 0.31573700  | C     | -3.72282500 | -3.97865000 | -1.63886200 |
| H     | -6.01896200 | -2.82854700 | 0.23459100  | H     | -2.64643000 | -4.15580500 | -1.61061100 |
| H     | -5.50486200 | -4.50684200 | 0.01936500  | H     | -4.23440400 | -4.92679500 | -1.50377700 |
| H     | -4.84383700 | -3.55576300 | 1.35652600  | H     | -3.99133300 | -3.57135100 | -2.61797000 |
| C     | 0.49088400  | -0.81304700 | 0.81981300  | C     | 0.50508300  | -0.81714700 | 0.82330700  |
| N     | 0.06214300  | -1.42295300 | 1.72089100  | N     | 0.08449600  | -1.42164900 | 1.73288300  |
| ***** |             |             |             | ***** |             |             |             |

| 1-A-11-D-P1234-N-HEXANE |             |             |             | 3-A-10-D-P1234 |             |             |             |
|-------------------------|-------------|-------------|-------------|----------------|-------------|-------------|-------------|
| C                       | -3.36199300 | -1.95852100 | -0.43302800 | C              | -3.22441200 | -2.13173000 | -1.48676500 |
| C                       | -2.37491400 | -1.46698300 | -1.34144000 | C              | -2.10441900 | -1.52728100 | -2.02533900 |
| H                       | -2.08352600 | -2.04999300 | -2.20236800 | C              | -3.94625600 | -1.49788900 | -0.44593400 |
| C                       | -3.80796700 | -1.08702600 | 0.58841500  | C              | -1.61184900 | -0.34835300 | -1.47558100 |
| H                       | -4.61547600 | -1.38375200 | 1.24308200  | H              | -0.78709600 | 0.15100100  | -1.95436800 |
| C                       | -1.77517600 | -0.26182600 | -1.12278500 | C              | -3.40598400 | -0.30935600 | 0.18561000  |
| H                       | -1.03790300 | 0.08924000  | -1.82749400 | C              | -2.17622500 | 0.22215900  | -0.30139300 |
| C                       | -3.24321200 | 0.17859700  | 0.77810300  | C              | -4.03056000 | 0.33618600  | 1.28632100  |
| C                       | -2.10989600 | 0.56843900  | -0.00258100 | H              | -4.87840600 | -0.10350400 | 1.78755000  |
| C                       | -3.79940300 | 1.09537400  | 1.72539300  | C              | -3.56434100 | 1.55378100  | 1.71021200  |
| H                       | -4.64525500 | 0.78470400  | 2.32786400  | H              | -4.09909000 | 2.08677900  | 2.48996900  |
| C                       | -3.30512000 | 2.35962100  | 1.80272300  | C              | -2.38810500 | 2.14476400  | 1.18572900  |
| H                       | -3.77365700 | 3.09327100  | 2.45003500  | C              | -1.56466900 | 1.37997600  | 0.31738700  |
| C                       | -2.15071000 | 2.75964000  | 1.05902900  | C              | -2.01908900 | 3.48062500  | 1.52570100  |
| C                       | -1.43887600 | 1.80940600  | 0.28367000  | H              | -2.66314700 | 4.05779500  | 2.17932100  |
| C                       | -1.73286200 | 4.12403100  | 1.05069100  | C              | -0.89767500 | 4.02541600  | 0.97334500  |

|       |             |             |             |       |             |             |             |
|-------|-------------|-------------|-------------|-------|-------------|-------------|-------------|
| H     | -2.28848400 | 4.84793800  | 1.63593800  | H     | -0.65061800 | 5.06615800  | 1.15705300  |
| C     | -0.69596600 | 4.51511500  | 0.25163900  | C     | 0.02644600  | 3.24265400  | 0.22029300  |
| H     | -0.43487400 | 5.56575700  | 0.17408900  | C     | -0.22415700 | 1.85034300  | 0.02478400  |
| C     | 0.11426600  | 3.56868800  | -0.44289100 | C     | 1.23300600  | 3.82957000  | -0.26108800 |
| C     | -0.15560100 | 2.17738300  | -0.28731700 | H     | 1.37189000  | 4.89824300  | -0.14179000 |
| C     | 1.22004300  | 3.99951700  | -1.23899400 | C     | 2.21007600  | 3.06169800  | -0.84333200 |
| H     | 1.36470700  | 5.06462200  | -1.38529000 | H     | 3.11904500  | 3.51919400  | -1.21867800 |
| C     | 2.07148100  | 3.09753200  | -1.81196400 | C     | 2.09278200  | 1.64847100  | -0.87308300 |
| H     | 2.88740900  | 3.43384100  | -2.44295800 | C     | 0.88745000  | 1.00943100  | -0.36326000 |
| C     | 1.96584200  | 1.70477400  | -1.50576100 | C     | 3.08217300  | 0.73111400  | -1.27687600 |
| C     | 0.88277900  | 1.24898600  | -0.64834400 | H     | -3.62287000 | -3.02258100 | -1.95126800 |
| C     | 2.86338400  | 0.70915300  | -1.87628800 | C     | 1.01535800  | -0.37881900 | -0.26683200 |
| H     | 3.70583000  | 0.86651500  | -2.53593200 | P     | 2.51744300  | -0.98454100 | -1.04274800 |
| C     | 1.05368700  | -0.10654300 | -0.25523000 | C     | 3.55134800  | -1.67641600 | 0.35761300  |
| P     | 2.39338100  | -0.89097700 | -1.22390800 | C     | 3.58589700  | -1.09009200 | 1.62868100  |
| C     | 3.69491500  | -1.35439200 | 0.03372300  | C     | 4.32290900  | -2.81544200 | 0.11328700  |
| C     | 4.22091200  | -0.42861800 | 0.94373500  | C     | 4.37965200  | -1.63506300 | 2.63384400  |
| C     | 4.16407900  | -2.67054500 | 0.05242200  | H     | 2.99088300  | -0.20474200 | 1.82370700  |
| C     | 5.19737100  | -0.81719500 | 1.85617100  | C     | 5.12125800  | -3.36184100 | 1.12006900  |
| H     | 3.86244800  | 0.59473400  | 0.93426700  | H     | 4.30284600  | -3.27274400 | -0.87072600 |
| C     | 5.14432500  | -3.06106700 | 0.96727400  | C     | 5.14951600  | -2.77278500 | 2.38124900  |
| H     | 3.76089100  | -3.39256600 | -0.65027400 | H     | 4.40367400  | -1.17103600 | 3.61432800  |
| C     | 5.66167100  | -2.13491000 | 1.86911100  | H     | 5.72055800  | -4.24283200 | 0.91667400  |
| H     | 5.59690800  | -0.09442800 | 2.55957100  | H     | 5.77018400  | -3.19367300 | 3.16483900  |
| H     | 5.50006500  | -4.08570400 | 0.97404600  | H     | 0.28878600  | -1.04276000 | 0.17527900  |
| H     | 6.42253600  | -2.43523700 | 2.58118100  | C     | 4.31576000  | 1.08263000  | -1.83278600 |
| N     | -3.88201300 | -3.21030000 | -0.56521700 | N     | 5.34565200  | 1.36958500  | -2.29519600 |
| C     | -3.41006400 | -4.10129700 | -1.62434100 | H     | -1.62859400 | -1.95136000 | -2.90017600 |
| H     | -2.33100500 | -4.25723500 | -1.54672700 | N     | -5.16596000 | -2.02937500 | -0.09662400 |
| H     | -3.90824700 | -5.06190500 | -1.52761100 | C     | -5.46051800 | -3.44274700 | -0.32156500 |
| H     | -3.63670600 | -3.69140700 | -2.61257200 | H     | -6.18741000 | -3.76159700 | 0.42772400  |
| C     | -4.88278600 | -3.71225900 | 0.37578400  | H     | -5.89668600 | -3.61420900 | -1.31286300 |
| H     | -5.80850600 | -3.13299600 | 0.31301000  | H     | -4.56211800 | -4.04453600 | -0.20713400 |
| H     | -5.10862900 | -4.74684700 | 0.13301500  | C     | -6.35528200 | -1.22370700 | 0.18697300  |
| H     | -4.50677100 | -3.67113700 | 1.40104000  | H     | -7.15706400 | -1.55949300 | -0.47816200 |
| C     | 0.42761300  | -0.81076900 | 0.77231200  | H     | -6.69199700 | -1.35884200 | 1.21883800  |
| N     | -0.03932900 | -1.45235700 | 1.62912200  | H     | -6.16280300 | -0.17239000 | 0.00024900  |
| ***** |             |             |             | ***** |             |             |             |

| 3-A-10-D-P1234-CCI4 |             |             |             | 3-A-10-D-P1234-DCM |             |             |             |
|---------------------|-------------|-------------|-------------|--------------------|-------------|-------------|-------------|
| C                   | -3.23939900 | -2.11051200 | -1.50390300 | C                  | -3.24528700 | -2.09824300 | -1.51527700 |
| C                   | -2.12754700 | -1.50227700 | -2.05147800 | C                  | -2.14341100 | -1.48403100 | -2.07252000 |
| C                   | -3.95402400 | -1.48284800 | -0.45147000 | C                  | -3.95618500 | -1.47553600 | -0.45471300 |
| C                   | -1.62476300 | -0.32761100 | -1.50037300 | C                  | -1.63535900 | -0.30991500 | -1.52298300 |
| H                   | -0.80628400 | 0.17340100  | -1.98886100 | H                  | -0.82427600 | 0.19452800  | -2.02101600 |
| C                   | -3.40129700 | -0.29689300 | 0.18066000  | C                  | -3.39659500 | -0.28871500 | 0.17524600  |
| C                   | -2.17516600 | 0.23496800  | -0.31812900 | C                  | -2.17511000 | 0.24613400  | -0.33508600 |
| C                   | -4.01019200 | 0.34428300  | 1.29146700  | C                  | -3.99390700 | 0.34924800  | 1.29278400  |
| H                   | -4.85529500 | -0.09345100 | 1.79759500  | H                  | -4.83528600 | -0.08832700 | 1.80395400  |
| C                   | -3.54078000 | 1.56031600  | 1.71791800  | C                  | -3.52515700 | 1.56622600  | 1.71971400  |
| H                   | -4.06983200 | 2.08997800  | 2.50337200  | H                  | -4.05179800 | 2.09341400  | 2.50796400  |
| C                   | -2.36843000 | 2.15066000  | 1.18499100  | C                  | -2.35711100 | 2.15738700  | 1.17966900  |
| C                   | -1.55645400 | 1.38880300  | 0.30270900  | C                  | -1.55298600 | 1.39847400  | 0.28641700  |
| C                   | -1.99298500 | 3.48380300  | 1.53063200  | C                  | -1.97838200 | 3.48908900  | 1.52930700  |
| H                   | -2.63404400 | 4.05866200  | 2.18922700  | H                  | -2.61909000 | 4.06175400  | 2.19008200  |

|       |             |             |             |       |             |             |             |
|-------|-------------|-------------|-------------|-------|-------------|-------------|-------------|
| C     | -0.87137600 | 4.02945400  | 0.98004500  | C     | -0.85590700 | 4.03636900  | 0.98237900  |
| H     | -0.61980000 | 5.06813600  | 1.16875300  | H     | -0.60216200 | 5.07371300  | 1.17491700  |
| C     | 0.04740700  | 3.24337300  | 0.22268600  | C     | 0.06067300  | 3.24763700  | 0.22381100  |
| C     | -0.21540700 | 1.85596500  | 0.01082000  | C     | -0.21173000 | 1.86407300  | -0.00295400 |
| C     | 1.25975600  | 3.82501100  | -0.24931000 | C     | 1.27865500  | 3.82487100  | -0.23640600 |
| H     | 1.40519000  | 4.89178500  | -0.12023100 | H     | 1.42900000  | 4.88991600  | -0.09827700 |
| C     | 2.23641600  | 3.05668700  | -0.83463800 | C     | 2.25743300  | 3.05626900  | -0.82172900 |
| H     | 3.14919100  | 3.51497300  | -1.19982100 | H     | 3.17460900  | 3.51571200  | -1.17472100 |
| C     | 2.10936700  | 1.64593500  | -0.87628900 | C     | 2.12197300  | 1.64828700  | -0.87510400 |
| C     | 0.89461400  | 1.01161200  | -0.38318700 | C     | 0.89831700  | 1.01757900  | -0.40022200 |
| C     | 3.09675000  | 0.72116000  | -1.28088800 | C     | 3.10903500  | 0.71688000  | -1.27923900 |
| H     | -3.64153500 | -2.99813100 | -1.97014100 | H     | -3.64790800 | -2.98521300 | -1.98096300 |
| C     | 1.01207300  | -0.37713500 | -0.29669100 | C     | 1.00681100  | -0.37191400 | -0.32331700 |
| P     | 2.51839100  | -0.99316000 | -1.05740400 | P     | 2.51753000  | -0.99672600 | -1.06807700 |
| C     | 3.53099600  | -1.68835500 | 0.35776900  | C     | 3.51193200  | -1.69732800 | 0.35744300  |
| C     | 3.56599300  | -1.09117200 | 1.62426200  | C     | 3.51906200  | -1.11569700 | 1.63225000  |
| C     | 4.28539200  | -2.84288900 | 0.13057700  | C     | 4.28193000  | -2.84229600 | 0.13002200  |
| C     | 4.34287300  | -1.63969100 | 2.64111400  | C     | 4.28465100  | -1.66836000 | 2.65607400  |
| H     | 2.98394200  | -0.19472500 | 1.80794300  | H     | 2.92205600  | -0.22963500 | 1.81915800  |
| C     | 5.06645900  | -3.39385800 | 1.14916200  | C     | 5.05210100  | -3.39730500 | 1.15532600  |
| H     | 4.26554300  | -3.31065800 | -0.84858300 | H     | 4.28119800  | -3.30244500 | -0.85301200 |
| C     | 5.09528800  | -2.79321700 | 2.40523500  | C     | 5.05368300  | -2.81121900 | 2.41908600  |
| H     | 4.36635600  | -1.16735000 | 3.61756000  | H     | 4.28410100  | -1.20963800 | 3.63914400  |
| H     | 5.65116200  | -4.28744600 | 0.95892100  | H     | 5.64682800  | -4.28415000 | 0.96523900  |
| H     | 5.70192800  | -3.21754400 | 3.19781300  | H     | 5.64946500  | -3.24001400 | 3.21728500  |
| H     | 0.27056600  | -1.03984900 | 0.12160000  | H     | 0.25261600  | -1.03349800 | 0.07340100  |
| C     | 4.33492300  | 1.06325100  | -1.82274500 | C     | 4.35332600  | 1.04963500  | -1.80136300 |
| N     | 5.37465000  | 1.33835600  | -2.27577600 | N     | 5.40523900  | 1.31307300  | -2.23927700 |
| H     | -1.66607700 | -1.92025200 | -2.93683800 | H     | -1.69437100 | -1.89738600 | -2.96646700 |
| N     | -5.16600700 | -2.01494500 | -0.10124700 | N     | -5.16079900 | -2.00983700 | -0.10446900 |
| C     | -6.34578500 | -1.22212100 | 0.25546400  | C     | -6.33300700 | -1.23177600 | 0.30868700  |
| H     | -7.17781700 | -1.56981000 | -0.36229800 | H     | -7.18344100 | -1.58584400 | -0.27787400 |
| H     | -6.61903200 | -1.36539000 | 1.30430000  | H     | -6.56027700 | -1.38969500 | 1.36593800  |
| H     | -6.17901400 | -0.16852100 | 0.05698100  | H     | -6.18696600 | -0.17500300 | 0.11088700  |
| C     | -5.46874400 | -3.42570200 | -0.35020200 | C     | -5.46786700 | -3.41852100 | -0.37284600 |
| H     | -6.18492800 | -3.75341300 | 0.40430100  | H     | -6.17494500 | -3.75425200 | 0.38564300  |
| H     | -5.92077600 | -3.57000200 | -1.33724400 | H     | -5.93194200 | -3.54147300 | -1.35604600 |
| H     | -4.57157300 | -4.03286200 | -0.26136300 | H     | -4.57094900 | -4.02804500 | -0.30460800 |
| ***** |             |             |             | ***** |             |             |             |

| 3-A-10-D-P1234-DMSO |             |             |             | 3-A-10-D-P1234-N-HEXANE |             |             |             |
|---------------------|-------------|-------------|-------------|-------------------------|-------------|-------------|-------------|
| C                   | -3.24806600 | -2.09637400 | -1.51687700 | C                       | -3.23893000 | -2.11541200 | -1.49923300 |
| C                   | -2.14966100 | -1.48065200 | -2.07786200 | C                       | -2.12463100 | -1.50923600 | -2.04482000 |
| C                   | -3.95750400 | -1.47439700 | -0.45403900 | C                       | -3.95450800 | -1.48532800 | -0.44944500 |
| C                   | -1.63971400 | -0.30621400 | -1.52984500 | C                       | -1.62282200 | -0.33394400 | -1.49440700 |
| H                   | -0.83125600 | 0.19902800  | -2.03161700 | H                       | -0.80274100 | 0.16580000  | -1.98134300 |
| C                   | -3.39513700 | -0.28729400 | 0.17469200  | C                       | -3.40232700 | -0.29998200 | 0.18306600  |
| C                   | -2.17556900 | 0.24855000  | -0.34047200 | C                       | -2.17530300 | 0.23096900  | -0.31380800 |
| C                   | -3.98798600 | 0.34970700  | 1.29456700  | C                       | -4.01304500 | 0.34167400  | 1.29281600  |
| H                   | -4.82736900 | -0.08816900 | 1.80840900  | H                       | -4.85828400 | -0.09660600 | 1.79859400  |
| C                   | -3.51974800 | 1.56753000  | 1.72080500  | C                       | -3.54347600 | 1.55766200  | 1.71884200  |
| H                   | -4.04541300 | 2.09422500  | 2.50985200  | H                       | -4.07262300 | 2.08782300  | 2.50398100  |
| C                   | -2.35391000 | 2.15915500  | 1.17723700  | C                       | -2.37079800 | 2.14803700  | 1.18642900  |
| C                   | -1.55247500 | 1.40103100  | 0.28024000  | C                       | -1.55735300 | 1.38551600  | 0.30622200  |
| C                   | -1.97466600 | 3.49085900  | 1.52710600  | C                       | -1.99638800 | 3.48178300  | 1.53048800  |

|       |             |             |             |       |             |             |             |
|-------|-------------|-------------|-------------|-------|-------------|-------------|-------------|
| H     | -2.61549500 | 4.06286400  | 2.18829100  | H     | -2.63748300 | 4.05709900  | 2.18865100  |
| C     | -0.85235400 | 4.03892700  | 0.98072900  | C     | -0.87547200 | 4.02735800  | 0.97835200  |
| H     | -0.59845000 | 5.07612600  | 1.17361200  | H     | -0.62474100 | 5.06652500  | 1.16560600  |
| C     | 0.06369100  | 3.24913500  | 0.22210800  | C     | 0.04374300  | 3.24182000  | 0.22119200  |
| C     | -0.21148500 | 1.86649400  | -0.00886600 | C     | -0.21664600 | 1.85337200  | 0.01315700  |
| C     | 1.28311500  | 3.82497000  | -0.23461600 | C     | 1.25444400  | 3.82456800  | -0.25399100 |
| H     | 1.43462700  | 4.88959100  | -0.09434300 | H     | 1.39847400  | 4.89181200  | -0.12742100 |
| C     | 2.26314500  | 3.05617000  | -0.81936400 | C     | 2.23086400  | 3.05633500  | -0.83921900 |
| H     | 3.18147500  | 3.51634000  | -1.16864400 | H     | 3.14240600  | 3.51460700  | -1.20742900 |
| C     | 2.12541400  | 1.64919100  | -0.87567800 | C     | 2.10609200  | 1.64501700  | -0.87761100 |
| C     | 0.89893600  | 1.01955300  | -0.40688300 | C     | 0.89362400  | 1.00975200  | -0.38008700 |
| C     | 3.11294500  | 0.71536300  | -1.27870600 | C     | 3.09386600  | 0.72167200  | -1.28206100 |
| H     | -3.65122900 | -2.98314900 | -1.98192100 | H     | -3.64127000 | -3.00322400 | -1.96518200 |
| C     | 1.00480700  | -0.37017800 | -0.33251400 | C     | 1.01351300  | -0.37876700 | -0.29080300 |
| P     | 2.51701700  | -0.99813000 | -1.07150500 | P     | 2.51891700  | -0.99294000 | -1.05469300 |
| C     | 3.50676600  | -1.69940200 | 0.35679200  | C     | 3.53650400  | -1.68540400 | 0.35814200  |
| C     | 3.50415000  | -1.12348900 | 1.63449100  | C     | 3.57377600  | -1.08706700 | 1.62392300  |
| C     | 4.28393200  | -2.83971000 | 0.12861600  | C     | 4.29238400  | -2.83860400 | 0.12973900  |
| C     | 4.26769300  | -1.67637500 | 2.65997600  | C     | 4.35437000  | -1.63335600 | 2.63902100  |
| H     | 2.89992900  | -0.24267700 | 1.82336400  | H     | 2.99078400  | -0.19136000 | 1.80809800  |
| C     | 5.05217200  | -3.39488300 | 1.15552300  | C     | 5.07718700  | -3.38723100 | 1.14657900  |
| H     | 4.28918700  | -3.29764600 | -0.85546400 | H     | 4.27086300  | -3.30674100 | -0.84919900 |
| C     | 5.04441100  | -2.81400800 | 2.42186300  | C     | 5.10824700  | -2.78558500 | 2.40203600  |
| H     | 4.25824700  | -1.22311700 | 3.64547300  | H     | 4.37987700  | -1.16000800 | 3.61494600  |
| H     | 5.65120600  | -4.27869400 | 0.96513900  | H     | 5.66332600  | -4.27969300 | 0.95539000  |
| H     | 5.63743900  | -3.24373400 | 3.22151400  | H     | 5.71803000  | -3.20801600 | 3.19323800  |
| H     | 0.24670600  | -1.03133700 | 0.05737800  | H     | 0.27502300  | -1.04168800 | 0.13251200  |
| C     | 4.36051300  | 1.04420000  | -1.79084000 | C     | 4.33075800  | 1.06555100  | -1.82762900 |
| N     | 5.41834700  | 1.30255500  | -2.22006400 | N     | 5.36825700  | 1.34290800  | -2.28328800 |
| H     | -1.70522700 | -1.89320400 | -2.97454100 | H     | -1.66056200 | -1.92907800 | -2.92793800 |
| N     | -5.16045200 | -2.00775500 | -0.10425000 | N     | -5.16940000 | -2.01446000 | -0.10047500 |
| C     | -6.32883500 | -1.23284000 | 0.32606900  | C     | -6.34945200 | -1.21587200 | 0.24151600  |
| H     | -7.18514600 | -1.58866500 | -0.25017100 | H     | -7.17632800 | -1.55910200 | -0.38600600 |
| H     | -6.54151800 | -1.39414400 | 1.38564400  | H     | -6.63609400 | -1.35672100 | 1.28716200  |
| H     | -6.18795100 | -0.17542800 | 0.12802200  | H     | -6.17471600 | -0.16315600 | 0.04525900  |
| C     | -5.47119800 | -3.41511400 | -0.37912700 | C     | -5.47404900 | -3.42492300 | -0.34570100 |
| H     | -6.17511200 | -3.75273200 | 0.38119000  | H     | -6.19411800 | -3.74921000 | 0.40680000  |
| H     | -5.94022500 | -3.52995800 | -1.36061800 | H     | -5.92223500 | -3.57278900 | -1.33422000 |
| H     | -4.57522700 | -4.02659000 | -0.31853200 | H     | -4.57836900 | -4.03354000 | -0.25098100 |
| ***** |             |             |             | ***** |             |             |             |

| I-D-13-A-1P234 |            |             |             | I-D-13-A-1P234-CCI4 |             |             |             |
|----------------|------------|-------------|-------------|---------------------|-------------|-------------|-------------|
| C              | 5.21347700 | 0.57882600  | -0.19209200 | C                   | -5.21668700 | -0.54708700 | -0.17497500 |
| C              | 4.20425600 | 1.23380700  | -0.86805200 | C                   | -4.21320400 | -1.20822400 | -0.85424900 |
| H              | 4.39626700 | 2.19276300  | -1.33635600 | H                   | -4.41128300 | -2.16947400 | -1.31538100 |
| C              | 5.00530800 | -0.72438400 | 0.29978100  | C                   | -5.00121100 | 0.75844000  | 0.30726000  |
| H              | 5.82570700 | -1.28801300 | 0.72868500  | H                   | -5.81723000 | 1.32666200  | 0.73883700  |
| C              | 2.91609300 | 0.64942300  | -1.03110800 | C                   | -2.92533800 | -0.62663200 | -1.02806700 |
| C              | 3.74268600 | -1.33496200 | 0.18266600  | C                   | -3.73644300 | 1.36103500  | 0.18940200  |
| C              | 2.62887800 | -0.61759300 | -0.36757100 | C                   | -2.62550300 | 0.63667500  | -0.36068200 |
| C              | 3.55739200 | -2.70965400 | 0.56132300  | C                   | -3.54272200 | 2.73401700  | 0.57165400  |
| H              | 4.41807400 | -3.25014000 | 0.94231000  | H                   | -4.39904400 | 3.27955100  | 0.95523800  |
| C              | 2.37716300 | -3.35882300 | 0.35711500  | C                   | -2.35646200 | 3.37216000  | 0.37319500  |
| H              | 2.29410600 | -4.42547200 | 0.53904000  | H                   | -2.26249200 | 4.43657500  | 0.56264000  |
| C              | 1.22993200 | -2.64691700 | -0.10283100 | C                   | -1.21261800 | 2.65176200  | -0.08697500 |

|       |             |             |             |       |             |             |             |
|-------|-------------|-------------|-------------|-------|-------------|-------------|-------------|
| C     | 1.33695100  | -1.22946300 | -0.29824700 | C     | -1.32952400 | 1.23548700  | -0.28942600 |
| C     | 0.02273000  | -3.31701900 | -0.42533400 | C     | -0.00142300 | 3.31530800  | -0.39850400 |
| H     | 0.00030700  | -4.39859800 | -0.33285400 | H     | 0.03052900  | 4.39546800  | -0.29451200 |
| C     | -1.08404300 | -2.64496700 | -0.90817500 | C     | 1.10266400  | 2.63642100  | -0.88605300 |
| H     | -1.95851100 | -3.18416900 | -1.25094800 | H     | 1.98226200  | 3.17209200  | -1.22123600 |
| C     | -1.07031900 | -1.23672900 | -0.86214100 | C     | 1.07732400  | 1.23107800  | -0.85568000 |
| C     | 0.07384500  | -0.54469000 | -0.42960100 | C     | -0.07165600 | 0.53932900  | -0.42465000 |
| C     | -1.44573000 | 1.29203900  | -0.64439000 | C     | 1.44066600  | -1.30080300 | -0.65806500 |
| H     | 6.18656000  | 1.04699100  | -0.09382200 | H     | -6.18988600 | -1.01277400 | -0.06670700 |
| C     | -3.80754800 | -0.29512100 | -0.31438300 | C     | 3.80995500  | 0.28666500  | -0.30991000 |
| C     | -4.82628700 | -0.85919800 | 1.81141300  | C     | 4.81757300  | 0.78507200  | 1.83761500  |
| C     | -5.07903300 | -0.01996300 | -0.83128500 | C     | 5.08772500  | 0.08407500  | -0.84467800 |
| C     | -6.08883600 | -0.56766500 | 1.29211600  | C     | 6.08788700  | 0.56929300  | 1.29903700  |
| C     | -6.21384500 | -0.14777100 | -0.02950400 | C     | 6.22168200  | 0.21845500  | -0.04194900 |
| H     | -5.18260400 | 0.28891500  | -1.86615300 | H     | 5.19744900  | -0.17477500 | -1.89238800 |
| H     | -7.19251500 | 0.07082900  | -0.44187800 | H     | 7.20551300  | 0.05713500  | -0.46801800 |
| P     | -2.35676800 | -0.08739900 | -1.45356200 | P     | 2.36193000  | 0.08037400  | -1.45101800 |
| C     | -0.23850700 | 0.84006000  | -0.08352000 | C     | 0.23231500  | -0.84756900 | -0.09158400 |
| C     | 0.49275600  | 1.74485900  | 0.76548400  | C     | -0.50338000 | -1.76212200 | 0.74695800  |
| C     | 0.19060600  | 3.13538400  | 0.67208100  | C     | -0.20836200 | -3.15271900 | 0.62939100  |
| C     | -0.90784200 | 3.57046900  | -0.03496200 | C     | 0.89006700  | -3.58259100 | -0.08086100 |
| C     | -1.76692600 | 2.64203600  | -0.65505600 | C     | 1.75763100  | -2.64987600 | -0.68496600 |
| H     | 0.76892800  | 3.84625000  | 1.24524400  | H     | -0.79025900 | -3.87074900 | 1.18922200  |
| H     | -1.14253800 | 4.62743100  | -0.06458100 | H     | 1.12017300  | -4.64005200 | -0.12298900 |
| H     | -2.65903100 | 2.99070800  | -1.16239600 | H     | 2.65182000  | -2.99611100 | -1.19005700 |
| C     | -3.69299300 | -0.72244700 | 1.01501700  | C     | 3.68577200  | 0.64356700  | 1.03969900  |
| H     | -6.97011200 | -0.67573900 | 1.91437200  | H     | 6.96779100  | 0.68116000  | 1.92249200  |
| H     | -4.72641300 | -1.19562900 | 2.83764100  | H     | 4.71059100  | 1.06568300  | 2.87969200  |
| H     | -2.71694000 | -0.95914100 | 1.42301100  | H     | 2.70407300  | 0.81937100  | 1.46476400  |
| N     | 1.35658700  | 1.30864700  | 1.73470500  | N     | -1.35960500 | -1.33871200 | 1.72672400  |
| C     | 2.36922600  | 2.19337300  | 2.29674800  | C     | -1.11576700 | -0.13851500 | 2.52770700  |
| H     | 3.20530800  | 1.57774400  | 2.62985200  | H     | -2.02727100 | 0.45522300  | 2.59871200  |
| H     | 2.73396500  | 2.88136500  | 1.53901700  | H     | -0.81865100 | -0.45350400 | 3.53601800  |
| H     | 1.98206700  | 2.75135500  | 3.15939100  | H     | -0.32299800 | 0.46284300  | 2.09785800  |
| C     | 1.11232400  | 0.10538900  | 2.52901900  | C     | -2.33945800 | -2.24700800 | 2.31360100  |
| H     | 2.02159500  | -0.49242000 | 2.59207500  | H     | -3.15943700 | -1.64711400 | 2.70810800  |
| H     | 0.81683400  | 0.41367500  | 3.54088400  | H     | -2.73603000 | -2.91909400 | 1.55730600  |
| H     | 0.31799200  | -0.49181900 | 2.09576300  | H     | -1.90500200 | -2.82462400 | 3.13889500  |
| C     | 2.04975100  | 1.24061700  | -1.97114100 | C     | -2.08007700 | -1.20733400 | -1.99086400 |
| N     | 1.37536900  | 1.76143700  | -2.76828900 | N     | -1.43298600 | -1.71547000 | -2.82008000 |
| ***** |             |             |             | ***** |             |             |             |

| 1-D-13-A-1P234-DCM |             |             |             | 1-D-13-A-1P234-DMSO |             |             |             |
|--------------------|-------------|-------------|-------------|---------------------|-------------|-------------|-------------|
| C                  | -5.22469600 | -0.50651500 | -0.18106700 | C                   | -5.22853100 | -0.49336800 | -0.18259800 |
| C                  | -4.22534100 | -1.17302300 | -0.86188600 | C                   | -4.23093500 | -1.16290800 | -0.86334400 |
| H                  | -4.42937300 | -2.13386700 | -1.32128600 | H                   | -4.43727100 | -2.12428800 | -1.32055900 |
| C                  | -4.99879200 | 0.79645700  | 0.30286800  | C                   | -4.99817900 | 0.80896700  | 0.30047100  |
| H                  | -5.81004700 | 1.36800300  | 0.73924500  | H                   | -5.80720800 | 1.38195500  | 0.73911400  |
| C                  | -2.93414800 | -0.59888800 | -1.03291200 | C                   | -2.93844000 | -0.59216700 | -1.03381000 |
| C                  | -3.73016000 | 1.38822300  | 0.19378500  | C                   | -3.72836100 | 1.39666500  | 0.19321900  |
| C                  | -2.62123500 | 0.65729300  | -0.35629800 | C                   | -2.62029700 | 0.66260400  | -0.35657400 |
| C                  | -3.52626000 | 2.75637400  | 0.59016100  | C                   | -3.52070300 | 2.76340900  | 0.59330000  |
| H                  | -4.37752000 | 3.30512500  | 0.98009200  | H                   | -4.36962300 | 3.31320200  | 0.98667200  |
| C                  | -2.33273600 | 3.38272600  | 0.40445300  | C                   | -2.32492400 | 3.38546700  | 0.41046100  |
| H                  | -2.22626300 | 4.44266700  | 0.61106300  | H                   | -2.21375700 | 4.44368700  | 0.62300600  |

|       |             |             |             |       |             |             |             |
|-------|-------------|-------------|-------------|-------|-------------|-------------|-------------|
| C     | -1.19243000 | 2.65505900  | -0.05939300 | C     | -1.18610900 | 2.65488300  | -0.05522600 |
| C     | -1.32078300 | 1.24107100  | -0.27633400 | C     | -1.31832200 | 1.24130400  | -0.27517800 |
| C     | 0.02383900  | 3.31117000  | -0.35514400 | C     | 0.03141300  | 3.30810600  | -0.34725300 |
| H     | 0.06782100  | 4.38879600  | -0.23269300 | H     | 0.07985300  | 4.38481900  | -0.21929600 |
| C     | 1.12526000  | 2.62613200  | -0.85089900 | C     | 1.13197100  | 2.62020300  | -0.84569100 |
| H     | 2.01066400  | 3.15950900  | -1.17449500 | H     | 2.01916600  | 3.15260300  | -1.16613500 |
| C     | 1.08706300  | 1.22446900  | -0.84269500 | C     | 1.08994400  | 1.22017200  | -0.84247000 |
| C     | -0.06840600 | 0.53315900  | -0.41558400 | C     | -0.06757500 | 0.52921300  | -0.41456400 |
| C     | 1.43403700  | -1.31189300 | -0.66958200 | C     | 1.43327900  | -1.31696600 | -0.66917300 |
| H     | -6.20004500 | -0.96679800 | -0.07055100 | H     | -6.20460900 | -0.95138300 | -0.07008000 |
| C     | 3.81641700  | 0.27012500  | -0.30704400 | C     | 3.81962400  | 0.26625100  | -0.30734700 |
| C     | 4.82083600  | 0.64143800  | 1.86750000  | C     | 4.82478400  | 0.61885100  | 1.86982700  |
| C     | 5.09598600  | 0.20140900  | -0.87061300 | C     | 5.09834000  | 0.22143200  | -0.87542100 |
| C     | 6.09458000  | 0.56498700  | 1.29837700  | C     | 6.09792500  | 0.56750900  | 1.29618300  |
| C     | 6.23104700  | 0.34471300  | -0.07007400 | C     | 6.23365800  | 0.36852800  | -0.07576600 |
| H     | 5.20693700  | 0.03761900  | -1.93701500 | H     | 5.20883900  | 0.07251500  | -1.94400700 |
| H     | 7.21664500  | 0.28857400  | -0.51811400 | H     | 7.21868700  | 0.33096200  | -0.52691700 |
| P     | 2.36747300  | 0.06966400  | -1.44553900 | P     | 2.37020900  | 0.06288700  | -1.44336200 |
| C     | 0.22597500  | -0.85491900 | -0.09572500 | C     | 0.22447100  | -0.85759700 | -0.09496000 |
| C     | -0.51697100 | -1.77615500 | 0.73139800  | C     | -0.52126200 | -1.77926600 | 0.72999500  |
| C     | -0.23120000 | -3.16643700 | 0.59418200  | C     | -0.23844200 | -3.16951600 | 0.58979200  |
| C     | 0.86501400  | -3.59474900 | -0.12138400 | C     | 0.85773900  | -3.59893800 | -0.12576800 |
| C     | 1.74119300  | -2.66096500 | -0.71384100 | C     | 1.73715700  | -2.66606800 | -0.71586700 |
| H     | -0.81470300 | -3.88829700 | 1.14704600  | H     | -0.82213800 | -3.89119500 | 1.14263500  |
| H     | 1.08990400  | -4.65292600 | -0.17204700 | H     | 1.08161900  | -4.65737200 | -0.17565800 |
| H     | 2.63575400  | -3.00789700 | -1.21770800 | H     | 2.63279000  | -3.01430600 | -1.21691700 |
| C     | 3.68863200  | 0.49445600  | 1.07101200  | C     | 3.69217700  | 0.46878000  | 1.07427500  |
| H     | 6.97450500  | 0.68055300  | 1.92103200  | H     | 6.97796200  | 0.68506400  | 1.91826700  |
| H     | 4.71158700  | 0.81664500  | 2.93202100  | H     | 4.71602000  | 0.77627500  | 2.93710300  |
| H     | 2.70502500  | 0.55838600  | 1.52241600  | H     | 2.70952100  | 0.51196900  | 1.53002000  |
| N     | -1.37182100 | -1.36018200 | 1.71477700  | N     | -1.37697100 | -1.36314700 | 1.71221200  |
| C     | -2.34110800 | -2.27944700 | 2.30532800  | C     | -2.34471100 | -2.28403200 | 2.30372300  |
| H     | -3.14978700 | -1.68619600 | 2.73142600  | H     | -3.15014600 | -1.69155300 | 2.73684600  |
| H     | -2.75316800 | -2.93904100 | 1.54610300  | H     | -2.76026400 | -2.94111600 | 1.54412500  |
| H     | -1.88857600 | -2.87172500 | 3.10917200  | H     | -1.88834000 | -2.87930900 | 3.10274100  |
| C     | -1.12170300 | -0.16952700 | 2.52934000  | C     | -1.12411100 | -0.17476300 | 2.52978800  |
| H     | -2.03088100 | 0.42713500  | 2.60756600  | H     | -2.03221400 | 0.42342200  | 2.60952600  |
| H     | -0.82967800 | -0.49866000 | 3.53371800  | H     | -0.83413100 | -0.50783300 | 3.53312000  |
| H     | -0.32317200 | 0.43101800  | 2.10948200  | H     | -0.32283700 | 0.42400500  | 2.11279400  |
| C     | -2.10013000 | -1.17494600 | -2.00568900 | C     | -2.10754000 | -1.16972000 | -2.00741900 |
| N     | -1.46823600 | -1.67329900 | -2.85432400 | N     | -1.48007200 | -1.66651800 | -2.86101000 |
| ***** |             |             |             | ***** |             |             |             |

| 1-D-13-A-1P234-N-HEXANE |            |             |             | 3-D-13-A-1P234 |             |             |             |
|-------------------------|------------|-------------|-------------|----------------|-------------|-------------|-------------|
| C                       | 5.21549200 | 0.55461500  | -0.17394400 | C              | -5.35669100 | 1.36256200  | -0.55168100 |
| C                       | 4.21129200 | 1.21510800  | -0.85257900 | C              | -4.33125000 | 1.81779300  | 0.25580300  |
| H                       | 4.40827500 | 2.17658900  | -1.31368300 | H              | -4.36577600 | 2.81622400  | 0.67506000  |
| C                       | 5.00151200 | -0.75128600 | 0.30805400  | C              | -5.37679800 | 0.03786500  | -1.00354500 |
| H                       | 5.81825200 | -1.31898800 | 0.73888600  | H              | -6.22239100 | -0.34543300 | -1.56149200 |
| C                       | 2.92375900 | 0.63262800  | -1.02650800 | C              | -3.23878200 | 0.96750000  | 0.60854700  |
| C                       | 3.73742200 | -1.35560000 | 0.18854100  | C              | -4.29160200 | -0.82916500 | -0.71362100 |
| C                       | 2.62614700 | -0.63226100 | -0.36157600 | C              | -3.14599100 | -0.34746300 | -0.00566900 |
| C                       | 3.54545000 | -2.72945000 | 0.56823600  | C              | -4.34971700 | -2.20984700 | -1.07525700 |
| H                       | 4.40254900 | -3.27427100 | 0.95112000  | H              | -5.24200400 | -2.56485400 | -1.58061800 |
| C                       | 2.36065800 | -3.36978900 | 0.36711000  | C              | -3.36848700 | -3.09321900 | -0.71457100 |

|       |             |             |             |       |             |             |             |
|-------|-------------|-------------|-------------|-------|-------------|-------------|-------------|
| H     | 2.26897000  | -4.43492200 | 0.55367100  | H     | -3.48566300 | -4.15650200 | -0.89462900 |
| C     | 1.21629500  | -2.65080200 | -0.09292300 | C     | -2.17662200 | -2.62347600 | -0.10776900 |
| C     | 1.33104100  | -1.23402200 | -0.29243200 | C     | -2.00794400 | -1.21620000 | 0.09952100  |
| C     | 0.00629600  | -3.31564800 | -0.40809500 | C     | -1.16941400 | -3.53205400 | 0.33179000  |
| H     | -0.02356100 | -4.39623000 | -0.30759000 | H     | -1.36950800 | -4.59475400 | 0.23483800  |
| C     | -1.09821900 | -2.63792900 | -0.89461000 | C     | 0.00885500  | -3.10605300 | 0.89756800  |
| H     | -1.97646700 | -3.17421100 | -1.23231700 | H     | 0.73256300  | -3.81566600 | 1.27970100  |
| C     | -1.07553300 | -1.23200500 | -0.85981300 | C     | 0.28990500  | -1.72298500 | 0.87444100  |
| C     | 0.07206200  | -0.54029400 | -0.42730400 | C     | -0.65830600 | -0.79891200 | 0.40360800  |
| C     | -1.44192900 | 1.29907400  | -0.65675300 | C     | 1.28906900  | 0.60483800  | 0.57576600  |
| H     | 6.18842100  | 1.02098600  | -0.06608400 | H     | -6.17694000 | 2.02902800  | -0.79660900 |
| C     | -3.80838700 | -0.28926700 | -0.31102600 | C     | 3.14333700  | -1.55880400 | 0.28123200  |
| C     | -4.81574300 | -0.80974300 | 1.83137600  | C     | 3.93708200  | -2.32263900 | -1.87766900 |
| C     | -5.08533300 | -0.06402700 | -0.83864500 | C     | 4.42657100  | -1.75605100 | 0.80414500  |
| C     | -6.08487800 | -0.57043100 | 1.30035900  | C     | 5.21690300  | -2.50617800 | -1.34984000 |
| C     | -6.21835600 | -0.19722300 | -0.03458200 | C     | 5.46080900  | -2.22293300 | -0.00875600 |
| H     | -5.19509500 | 0.21118900  | -1.88221100 | H     | 4.61559300  | -1.55027400 | 1.85262200  |
| H     | -7.20149600 | -0.01806100 | -0.45511700 | H     | 6.45013700  | -2.37264000 | 0.40914900  |
| P     | -2.36106000 | -0.08169200 | -1.45322800 | P     | 1.83387200  | -0.92708100 | 1.43718100  |
| C     | -0.23396500 | 0.84603600  | -0.09110100 | C     | -0.04479800 | 0.48157800  | 0.09065700  |
| C     | 0.50010800  | 1.75840600  | 0.75046900  | C     | -0.56377900 | 1.52878000  | -0.70905400 |
| C     | 0.20412200  | 3.14916900  | 0.63727300  | C     | 0.15769800  | 2.68370800  | -0.90194400 |
| C     | -0.89392300 | 3.58014900  | -0.07281700 | C     | 1.44118300  | 2.85688100  | -0.31230400 |
| C     | -1.75982900 | 2.64832900  | -0.68024200 | C     | 2.00470400  | 1.76408700  | 0.41372900  |
| H     | 0.78533000  | 3.86577000  | 1.19975000  | H     | -0.26817400 | 3.46535600  | -1.51401600 |
| H     | -1.12467100 | 4.63756600  | -0.11281200 | H     | 2.99289400  | 1.84811100  | 0.84434600  |
| H     | -2.65349700 | 2.99512700  | -1.18590200 | C     | 2.90689000  | -1.85241500 | -1.06896400 |
| C     | -3.68466800 | -0.66887400 | 1.03232900  | H     | 6.01664000  | -2.87571400 | -1.98195400 |
| H     | -6.96426200 | -0.68183800 | 1.92464400  | H     | 3.74228100  | -2.55013200 | -2.91999900 |
| H     | -4.70907300 | -1.10836700 | 2.86848900  | H     | 1.91444200  | -1.72059000 | -1.48521600 |
| H     | -2.70378400 | -0.86352900 | 1.45099400  | H     | -1.53240200 | 1.42226700  | -1.17246200 |
| N     | 1.35610000  | 1.33224300  | 1.72946300  | N     | 2.12614800  | 4.03000500  | -0.44770600 |
| C     | 2.33988300  | 2.23654300  | 2.31499100  | C     | 3.47148700  | 4.18326600  | 0.10218500  |
| H     | 3.16194100  | 1.63404100  | 2.70132100  | H     | 3.86446500  | 5.15381900  | -0.19013400 |
| H     | 2.73298700  | 2.91145100  | 1.55944200  | H     | 3.46173500  | 4.12809400  | 1.19539400  |
| H     | 1.91102200  | 2.81078100  | 3.14577100  | H     | 4.14287200  | 3.41218900  | -0.28339100 |
| C     | 1.11139900  | 0.13054600  | 2.52759300  | C     | 1.50760200  | 5.18087000  | -1.10222400 |
| H     | 2.02189100  | -0.46501200 | 2.59609100  | H     | 0.54037400  | 5.41070300  | -0.64911400 |
| H     | 0.81521500  | 0.44320800  | 3.53707600  | H     | 2.15630100  | 6.04573800  | -0.98739100 |
| H     | 0.31751300  | -0.46862800 | 2.09661500  | H     | 1.36038800  | 4.99803500  | -2.17152600 |
| C     | 2.07577900  | 1.21587000  | -1.98585700 | C     | -2.40951400 | 1.38889800  | 1.66610200  |
| N     | 1.42500200  | 1.72715600  | -2.80987500 | N     | -1.76476300 | 1.79311300  | 2.55147300  |
| ***** |             |             |             | ***** |             |             |             |

| 3-D-13-A-1P234-CCl4 |             |             |             | 3-D-13-A-1P234-DCM |             |             |             |
|---------------------|-------------|-------------|-------------|--------------------|-------------|-------------|-------------|
| C                   | -5.36794100 | 1.35508700  | -0.54121600 | C                  | -5.38631900 | 1.34187800  | -0.51910300 |
| C                   | -4.34693500 | 1.80562400  | 0.27421900  | C                  | -4.36711400 | 1.78849200  | 0.30052900  |
| H                   | -4.38639500 | 2.80089200  | 0.70109900  | H                  | -4.41068000 | 2.78065100  | 0.73472700  |
| C                   | -5.38133500 | 0.03159300  | -1.00268100 | C                  | -5.39234700 | 0.02023400  | -0.99154600 |
| H                   | -6.22511700 | -0.35074600 | -1.56439300 | H                  | -6.23544800 | -0.36117300 | -1.55522400 |
| C                   | -3.25338900 | 0.95546300  | 0.62329700  | C                  | -3.26975400 | 0.94007000  | 0.63989600  |
| C                   | -4.29466700 | -0.83185000 | -0.72059700 | C                  | -4.30238500 | -0.83815600 | -0.72296700 |
| C                   | -3.14844900 | -0.35305300 | -0.00844000 | C                  | -3.15306000 | -0.36127700 | -0.00978900 |
| C                   | -4.34567000 | -2.21044800 | -1.09871900 | C                  | -4.34540500 | -2.21370900 | -1.12046800 |
| H                   | -5.23544500 | -2.56539800 | -1.60856200 | H                  | -5.23296800 | -2.56840800 | -1.63420300 |

|       |             |             |             |       |             |             |             |
|-------|-------------|-------------|-------------|-------|-------------|-------------|-------------|
| C     | -3.35774300 | -3.08892100 | -0.74985900 | C     | -3.34850500 | -3.08634000 | -0.78858000 |
| H     | -3.46602600 | -4.15049900 | -0.94537100 | H     | -3.44639400 | -4.14533900 | -1.00272800 |
| C     | -2.16640800 | -2.61993800 | -0.13628500 | C     | -2.15655700 | -2.61764900 | -0.16992200 |
| C     | -2.00601000 | -1.21302200 | 0.08785300  | C     | -2.00538200 | -1.21112900 | 0.07320700  |
| C     | -1.15666600 | -3.52825200 | 0.28809400  | C     | -1.14311600 | -3.52466500 | 0.23626700  |
| H     | -1.34695500 | -4.59053700 | 0.17062600  | H     | -1.32251900 | -4.58596100 | 0.09659400  |
| C     | 0.01956100  | -3.10126000 | 0.86498200  | C     | 0.03230600  | -3.09686200 | 0.82387400  |
| H     | 0.74737800  | -3.81242700 | 1.23610200  | H     | 0.76481000  | -3.80985100 | 1.18191600  |
| C     | 0.29172300  | -1.71886500 | 0.86310900  | C     | 0.29474000  | -1.71593500 | 0.84480600  |
| C     | -0.65827600 | -0.79006400 | 0.39863400  | C     | -0.65873500 | -0.78223400 | 0.38836400  |
| C     | 1.28576000  | 0.61570600  | 0.58388600  | C     | 1.28172300  | 0.62611000  | 0.58536000  |
| H     | -6.18934900 | 2.02083300  | -0.78397100 | H     | -6.21037100 | 2.00594900  | -0.75667100 |
| C     | 3.14768200  | -1.55262800 | 0.28803400  | C     | 3.15700100  | -1.54477700 | 0.29741100  |
| C     | 3.96309900  | -2.26925000 | -1.87921300 | C     | 4.00554800  | -2.21814400 | -1.87098900 |
| C     | 4.41353600  | -1.80362200 | 0.83015100  | C     | 4.40305700  | -1.84186300 | 0.86181100  |
| C     | 5.22562600  | -2.50916900 | -1.33157600 | C     | 5.24819100  | -2.50671000 | -1.30081400 |
| C     | 5.44997300  | -2.27633500 | 0.02283800  | C     | 5.44607600  | -2.31844900 | 0.06493000  |
| H     | 4.58878300  | -1.63369800 | 1.88722900  | H     | 4.55943100  | -1.70269800 | 1.92611100  |
| H     | 6.42583100  | -2.46767900 | 0.45490600  | H     | 6.40681700  | -2.54474500 | 0.51334700  |
| P     | 1.83295800  | -0.92060100 | 1.43518700  | P     | 1.83145400  | -0.91351600 | 1.42853100  |
| C     | -0.05042200 | 0.49391500  | 0.10044100  | C     | -0.05766800 | 0.50484600  | 0.10502900  |
| C     | -0.57150400 | 1.54862200  | -0.68946000 | C     | -0.58382500 | 1.56823100  | -0.67137800 |
| C     | 0.15336200  | 2.70037900  | -0.88593200 | C     | 0.14176400  | 2.71910200  | -0.86827900 |
| C     | 1.44431000  | 2.86807900  | -0.30557800 | C     | 1.44113200  | 2.88103600  | -0.30011200 |
| C     | 2.00483100  | 1.77199100  | 0.42167900  | C     | 2.00233900  | 1.78070400  | 0.42381800  |
| H     | -0.27258400 | 3.48491100  | -1.49383900 | H     | -0.28448300 | 3.50582900  | -1.47292500 |
| H     | 2.99752800  | 1.85079400  | 0.84214600  | H     | 2.99916000  | 1.85555700  | 0.83456100  |
| C     | 2.93054400  | -1.79441000 | -1.07595600 | C     | 2.96601800  | -1.74042600 | -1.07813800 |
| H     | 6.02725100  | -2.88164900 | -1.95944300 | H     | 6.05550600  | -2.87990000 | -1.92077600 |
| H     | 3.78387100  | -2.45576400 | -2.93234100 | H     | 3.84780000  | -2.36735600 | -2.93334700 |
| H     | 1.95250200  | -1.61722800 | -1.50917700 | H     | 2.00480900  | -1.52288900 | -1.53026700 |
| H     | -1.54164800 | 1.44768300  | -1.15127600 | H     | -1.55545100 | 1.47181800  | -1.13154600 |
| N     | 2.13571900  | 4.03003300  | -0.45283700 | N     | 2.13681700  | 4.03399600  | -0.45749600 |
| C     | 3.47555400  | 4.18642400  | 0.11546100  | C     | 3.48730400  | 4.18184100  | 0.09214800  |
| H     | 3.85270700  | 5.17335400  | -0.13731200 | H     | 3.85856000  | 5.17288200  | -0.15059100 |
| H     | 3.45211500  | 4.09296700  | 1.20459700  | H     | 3.47905800  | 4.07077900  | 1.17911800  |
| H     | 4.16314700  | 3.44011300  | -0.29010800 | H     | 4.16660900  | 3.44178300  | -0.33735800 |
| C     | 1.54297600  | 5.16633500  | -1.15892700 | C     | 1.55446500  | 5.16727600  | -1.17995300 |
| H     | 0.59135700  | 5.45170000  | -0.70431200 | H     | 0.60708700  | 5.46827200  | -0.72739900 |
| H     | 2.22188500  | 6.01245900  | -1.10079800 | H     | 2.24284900  | 6.00577100  | -1.13428400 |
| H     | 1.37387800  | 4.92870200  | -2.21310500 | H     | 1.38244400  | 4.91415200  | -2.22955900 |
| C     | -2.44300000 | 1.36017100  | 1.69891300  | C     | -2.46941800 | 1.32935300  | 1.72583500  |
| N     | -1.82283700 | 1.74716900  | 2.61092100  | N     | -1.86265600 | 1.69636300  | 2.65679300  |
| ***** |             |             |             | ***** |             |             |             |

| 3-D-13-A-1P234-DMSO |             |             |             | 3-D-13-A-1P234-N-HEXANE |             |             |             |
|---------------------|-------------|-------------|-------------|-------------------------|-------------|-------------|-------------|
| C                   | -5.39614200 | 1.33103500  | -0.50353900 | C                       | -5.36523900 | 1.35659800  | -0.54416200 |
| C                   | -4.37709200 | 1.77606700  | 0.31713400  | C                       | -4.34360200 | 1.80808500  | 0.26999700  |
| H                   | -4.42281900 | 2.76627800  | 0.75570400  | H                       | -4.38221300 | 2.80399100  | 0.69535600  |
| C                   | -5.39833500 | 0.01099300  | -0.98247700 | C                       | -5.37991400 | 0.03277000  | -1.00354300 |
| H                   | -6.24127400 | -0.36983600 | -1.54689500 | H                       | -6.22392400 | -0.34983200 | -1.56466900 |
| C                   | -3.27679500 | 0.92918200  | 0.64959300  | C                       | -3.25044100 | 0.95785500  | 0.62033900  |
| C                   | -4.30587600 | -0.84455500 | -0.72211200 | C                       | -4.29364100 | -0.83138400 | -0.71945400 |
| C                   | -3.15498000 | -0.36805200 | -0.00914300 | C                       | -3.14771900 | -0.35200400 | -0.00792200 |
| C                   | -4.34441700 | -2.21818200 | -1.12949100 | C                       | -4.34602200 | -2.21048400 | -1.09411000 |

|       |             |             |             |       |             |             |             |
|-------|-------------|-------------|-------------|-------|-------------|-------------|-------------|
| H     | -5.23105100 | -2.57287600 | -1.64473000 | H     | -5.23626500 | -2.56553100 | -1.60307200 |
| C     | -3.34253200 | -3.08777900 | -0.80703400 | C     | -3.35946900 | -3.08986800 | -0.74264800 |
| H     | -3.43517400 | -4.14530200 | -1.03052900 | H     | -3.46950800 | -4.15184300 | -0.93494500 |
| C     | -2.15015400 | -2.61866500 | -0.18687900 | C     | -2.16809600 | -2.62067300 | -0.13033000 |
| C     | -2.00422900 | -1.21255000 | 0.06568100  | C     | -2.00613100 | -1.21366600 | 0.09039300  |
| C     | -1.13366800 | -3.52402300 | 0.21019900  | C     | -1.15883300 | -3.52903100 | 0.29707000  |
| H     | -1.30723000 | -4.58482100 | 0.06036500  | H     | -1.35097900 | -4.59144700 | 0.18359400  |
| C     | 0.04150600  | -3.09510100 | 0.80195600  | C     | 0.01771100  | -3.10212400 | 0.87181900  |
| H     | 0.77690900  | -3.80837600 | 1.15340600  | H     | 0.74479400  | -3.81293300 | 1.24508800  |
| C     | 0.29849300  | -1.71473900 | 0.83325800  | C     | 0.29151800  | -1.71954200 | 0.86581500  |
| C     | -0.65810900 | -0.77996600 | 0.38130300  | C     | -0.65810000 | -0.79171100 | 0.40001400  |
| C     | 1.27921400  | 0.63179600  | 0.58189400  | C     | 1.28646500  | 0.61381900  | 0.58293000  |
| H     | -6.22219500 | 1.99385000  | -0.73718200 | H     | -6.18633500 | 2.02249500  | -0.78763900 |
| C     | 3.16459000  | -1.53819300 | 0.30128600  | C     | 3.14660800  | -1.55373400 | 0.28630200  |
| C     | 4.03364800  | -2.19116300 | -1.86505600 | C     | 3.95717900  | -2.27737900 | -1.88039700 |
| C     | 4.39961600  | -1.85687200 | 0.87807500  | C     | 4.41552600  | -1.79686300 | 0.82478100  |
| C     | 5.26509500  | -2.50262600 | -1.28244100 | C     | 5.22276700  | -2.50900200 | -1.33646200 |
| C     | 5.44724600  | -2.33532800 | 0.08833200  | C     | 5.45106900  | -2.26875800 | 0.01593800  |
| H     | 4.54446400  | -1.73207700 | 1.94569500  | H     | 4.59356800  | -1.62174900 | 1.88057900  |
| H     | 6.39956200  | -2.57800900 | 0.54592900  | H     | 6.42928500  | -2.45409600 | 0.44533700  |
| P     | 1.83186800  | -0.90815100 | 1.42243400  | P     | 1.83343000  | -0.92175000 | 1.43583000  |
| C     | -0.06176800 | 0.50890300  | 0.10380900  | C     | -0.04918200 | 0.49165100  | 0.09897700  |
| C     | -0.59249100 | 1.57539100  | -0.66587000 | C     | -0.56965000 | 1.54471600  | -0.69322700 |
| C     | 0.13120400  | 2.72744200  | -0.86224800 | C     | 0.15467600  | 2.69696800  | -0.88927300 |
| C     | 1.43395000  | 2.88884900  | -0.29975100 | C     | 1.44398300  | 2.86600000  | -0.30664300 |
| C     | 1.99821600  | 1.78717700  | 0.42114100  | C     | 2.00484900  | 1.77068500  | 0.42083200  |
| H     | -0.29712200 | 3.51484500  | -1.46449400 | H     | -0.27140500 | 3.48098500  | -1.49780500 |
| H     | 2.99711800  | 1.86151000  | 0.82660300  | H     | 2.99682500  | 1.85037500  | 0.84294200  |
| C     | 2.98921200  | -1.71214800 | -1.07933700 | C     | 2.92555900  | -1.80320300 | -1.07561300 |
| H     | 6.07636600  | -2.87605000 | -1.89701500 | H     | 6.02364400  | -2.88114500 | -1.96550600 |
| H     | 3.88874400  | -2.32262300 | -2.93152400 | H     | 3.77477400  | -2.47002000 | -2.93189300 |
| H     | 2.03742200  | -1.47545500 | -1.54165800 | H     | 1.94492700  | -1.63283400 | -1.50569400 |
| H     | -1.56495600 | 1.47947700  | -1.12460200 | H     | -1.53946500 | 1.44269500  | -1.15541900 |
| N     | 2.12888600  | 4.04015100  | -0.45989100 | N     | 2.13417300  | 4.02998000  | -0.45160300 |
| C     | 3.48254800  | 4.18723300  | 0.08367300  | C     | 3.47227500  | 4.18785100  | 0.11943400  |
| H     | 3.84955200  | 5.18092000  | -0.15380000 | H     | 3.85013600  | 5.17431900  | -0.13456800 |
| H     | 3.47975200  | 4.06796600  | 1.16958100  | H     | 3.44681500  | 4.09664000  | 1.20887000  |
| H     | 4.16040900  | 3.45163800  | -0.35529700 | H     | 4.16124300  | 3.44092600  | -0.28279400 |
| C     | 1.54764000  | 5.17183600  | -1.18664100 | C     | 1.53886600  | 5.16700700  | -1.15370400 |
| H     | 0.60338700  | 5.47875700  | -0.73162500 | H     | 0.58603500  | 5.44817100  | -0.69883800 |
| H     | 2.23968500  | 6.00744900  | -1.14862100 | H     | 2.21527000  | 6.01503500  | -1.09208700 |
| H     | 1.37057300  | 4.91249200  | -2.23364600 | H     | 1.37089800  | 4.93325400  | -2.20903000 |
| C     | -2.47785500 | 1.31119700  | 1.73810700  | C     | -2.43719100 | 1.36583000  | 1.69308900  |
| N     | -1.87268100 | 1.66692900  | 2.67521800  | N     | -1.81338600 | 1.75664000  | 2.60064600  |
| ***** |             |             |             | ***** |             |             |             |

|                |             |             |             |                     |             |             |             |
|----------------|-------------|-------------|-------------|---------------------|-------------|-------------|-------------|
| 2-D-10-A-12P34 |             |             |             | 2-D-10-A-12P34-CCI4 |             |             |             |
| C              | -2.50033100 | -2.72475100 | 0.49457000  | C                   | -2.53611900 | -2.70846900 | 0.49268200  |
| C              | -2.13899700 | -4.01499200 | -0.00970000 | C                   | -2.19682100 | -3.99492700 | -0.04013300 |
| H              | -2.76159500 | -4.87647000 | 0.18318500  | H                   | -2.83081800 | -4.85019600 | 0.14116100  |
| C              | -1.67727800 | -1.61918200 | 0.16667500  | C                   | -1.70110100 | -1.60671000 | 0.17537200  |
| H              | -1.90659700 | -0.64731800 | 0.56724600  | H                   | -1.91681400 | -0.64054800 | 0.59731600  |
| C              | -0.99018700 | -4.16036200 | -0.73177500 | C                   | -1.05557400 | -4.14398400 | -0.77060400 |
| H              | -0.70578100 | -5.14580900 | -1.08484700 | H                   | -0.78728200 | -5.12643900 | -1.14345000 |
| C              | -3.63056100 | 1.71771800  | -1.07819400 | C                   | -3.60639200 | 1.76889300  | -1.05954100 |

|       |             |             |             |       |             |             |             |
|-------|-------------|-------------|-------------|-------|-------------|-------------|-------------|
| C     | -2.43636100 | 0.98528700  | -1.19178900 | C     | -2.42019900 | 1.02286400  | -1.16996000 |
| C     | -3.64938900 | 2.96429900  | -0.48070900 | C     | -3.60824500 | 3.02046600  | -0.47375400 |
| H     | -4.57570400 | 3.51545300  | -0.37560900 | H     | -4.52841600 | 3.58195300  | -0.36788700 |
| C     | -2.44054400 | 3.55718700  | -0.04163000 | C     | -2.38932300 | 3.60142600  | -0.04243600 |
| C     | -1.18652400 | 2.86311600  | -0.21250400 | C     | -1.14231500 | 2.89109700  | -0.20906600 |
| C     | -1.20798000 | 1.50711500  | -0.70357500 | C     | -1.18499100 | 1.53012700  | -0.68950200 |
| C     | 0.05226800  | 3.49888900  | 0.02237500  | C     | 0.10463200  | 3.51054600  | 0.01852000  |
| H     | 0.04756000  | 4.52693700  | 0.36633600  | H     | 0.11986800  | 4.54106600  | 0.35483400  |
| C     | 1.26292400  | 2.88206500  | -0.28097700 | C     | 1.30553100  | 2.87133400  | -0.28501300 |
| H     | 2.18678200  | 3.44587100  | -0.21774700 | H     | 2.23820900  | 3.42129700  | -0.22763700 |
| C     | 1.26849900  | 1.54466400  | -0.66060500 | C     | 1.29074800  | 1.53307000  | -0.65740200 |
| C     | 0.04856600  | 0.80902100  | -0.73360000 | C     | 0.06134800  | 0.81036500  | -0.72040000 |
| C     | 1.63300800  | -0.89762200 | -1.32840700 | C     | 1.61663600  | -0.91412500 | -1.32976300 |
| C     | 3.77795300  | 0.25616400  | 0.15885000  | C     | 3.78102200  | 0.21043900  | 0.16318300  |
| C     | 4.17836700  | -0.00587600 | 2.53465800  | C     | 4.16768400  | -0.09310600 | 2.53698900  |
| C     | 5.12945200  | -0.01786000 | -0.08109500 | C     | 5.13722200  | -0.04377700 | -0.07278700 |
| C     | 5.52089100  | -0.29456400 | 2.28496400  | C     | 5.51607300  | -0.35944300 | 2.29122500  |
| C     | 5.99568800  | -0.30013000 | 0.97559900  | C     | 5.99993100  | -0.33456300 | 0.98510200  |
| H     | 5.50811900  | -0.00019900 | -1.09811900 | H     | 5.52250500  | -0.00676000 | -1.08665400 |
| H     | 7.04070200  | -0.51020000 | 0.77573400  | H     | 7.04847500  | -0.52924300 | 0.78848900  |
| P     | 2.69254700  | 0.60811400  | -1.31331500 | P     | 2.70005500  | 0.57296100  | -1.30904200 |
| C     | 0.31253300  | -0.61654600 | -0.92949300 | C     | 0.30110100  | -0.61679200 | -0.91977100 |
| C     | -0.53685100 | -1.74732800 | -0.63821200 | C     | -0.56640200 | -1.73764800 | -0.63637800 |
| C     | -0.12210500 | -3.06338100 | -1.02568300 | C     | -0.17227100 | -3.05363800 | -1.04806100 |
| C     | 1.14689300  | -3.26164500 | -1.59393200 | C     | 1.09024900  | -3.26350600 | -1.62425800 |
| C     | 2.02694200  | -2.19003500 | -1.69310500 | C     | 1.98983800  | -2.20589800 | -1.71306300 |
| H     | 1.45404000  | -4.25732600 | -1.89252700 | H     | 1.37886200  | -4.25976600 | -1.93859300 |
| H     | 3.03485100  | -2.35959000 | -2.05713400 | H     | 2.99271400  | -2.38770600 | -2.08451600 |
| C     | 3.31141400  | 0.26640300  | 1.47951600  | C     | 3.30488900  | 0.18878000  | 1.48067700  |
| H     | 6.19423700  | -0.50350900 | 3.10883600  | H     | 6.18611700  | -0.57624500 | 3.11570400  |
| H     | 3.80787900  | 0.01122100  | 3.55397600  | H     | 3.78950800  | -0.10198700 | 3.55352100  |
| H     | 2.27252500  | 0.50218000  | 1.68071700  | H     | 2.26117700  | 0.40397100  | 1.68016000  |
| H     | -2.44522300 | 0.04051600  | -1.71639000 | H     | -2.44524600 | 0.06765000  | -1.67438100 |
| N     | -3.60485900 | -2.55663300 | 1.27531200  | N     | -3.62617400 | -2.54231100 | 1.28719700  |
| C     | -4.37159500 | -3.71204700 | 1.73461300  | C     | -4.41833100 | -3.69440500 | 1.71839000  |
| H     | -3.72044300 | -4.44894100 | 2.21118600  | H     | -3.77811200 | -4.46655700 | 2.14937900  |
| H     | -5.10737300 | -3.38036400 | 2.46287100  | H     | -5.12664300 | -3.37049600 | 2.47603300  |
| H     | -4.89856900 | -4.19293400 | 0.90419600  | H     | -4.97653400 | -4.12261500 | 0.88027900  |
| C     | -4.02462600 | -1.23339400 | 1.74839800  | C     | -4.02031800 | -1.22273900 | 1.79174600  |
| H     | -5.07758200 | -1.27865400 | 2.01921000  | H     | -5.05768200 | -1.26934000 | 2.11404700  |
| H     | -3.44937800 | -0.93065500 | 2.63006400  | H     | -3.40045300 | -0.93018700 | 2.64541500  |
| H     | -3.90418600 | -0.48252400 | 0.97000700  | H     | -3.93597000 | -0.46633500 | 1.01360900  |
| C     | -2.46189500 | 4.85012200  | 0.52582300  | C     | -2.39735100 | 4.89711800  | 0.51371900  |
| N     | -2.47709800 | 5.91283500  | 0.99914300  | N     | -2.40647000 | 5.96517700  | 0.97859300  |
| H     | -4.54982400 | 1.30319000  | -1.47899000 | H     | -4.53267800 | 1.35725300  | -1.44601800 |
| ***** |             |             |             | ***** |             |             |             |

| 2-D-10-A-12P34-DCM |             |             |             | 2-D-10-A-12P34-DMSO |             |             |             |
|--------------------|-------------|-------------|-------------|---------------------|-------------|-------------|-------------|
| C                  | -2.58885800 | -2.67710200 | 0.48800200  | C                   | -2.61570100 | -2.65854600 | 0.48566100  |
| C                  | -2.27999200 | -3.96063100 | -0.07293600 | C                   | -2.32150600 | -3.94162200 | -0.08501800 |
| H                  | -2.93197700 | -4.80461900 | 0.09562300  | H                   | -2.98290100 | -4.77913100 | 0.07859600  |
| C                  | -1.73445900 | -1.58514200 | 0.18264500  | C                   | -1.75108900 | -1.57285000 | 0.18472200  |
| H                  | -1.92874500 | -0.62451300 | 0.62768200  | H                   | -1.93494600 | -0.61388700 | 0.63792900  |
| C                  | -1.14797600 | -4.12007400 | -0.81303700 | C                   | -1.19327300 | -4.10813000 | -0.82849300 |
| H                  | -0.90280900 | -5.10014800 | -1.20687000 | H                   | -0.95951700 | -5.08777000 | -1.23004600 |

|       |             |             |             |       |             |             |             |
|-------|-------------|-------------|-------------|-------|-------------|-------------|-------------|
| C     | -3.57241800 | 1.84206900  | -1.02647600 | C     | -3.55489400 | 1.87795200  | -1.01204400 |
| C     | -2.39925000 | 1.07555200  | -1.14035700 | C     | -2.38871300 | 1.10097300  | -1.12858000 |
| C     | -3.54593000 | 3.09873400  | -0.45368700 | C     | -3.51391500 | 3.13608200  | -0.44376400 |
| H     | -4.45552500 | 3.67633800  | -0.34199800 | H     | -4.41788600 | 3.72181700  | -0.32855000 |
| C     | -2.31124500 | 3.66001400  | -0.03857600 | C     | -2.27174300 | 3.68650800  | -0.03598800 |
| C     | -1.07772400 | 2.92411900  | -0.20256400 | C     | -1.04556300 | 2.93803000  | -0.19994100 |
| C     | -1.15240800 | 1.55900900  | -0.67254500 | C     | -1.13613700 | 1.57191000  | -0.66639000 |
| C     | 0.18179900  | 3.51828700  | 0.01653500  | C     | 0.22025400  | 3.51939400  | 0.01535500  |
| H     | 0.22430400  | 4.54984800  | 0.34755800  | H     | 0.27584300  | 4.55082100  | 0.34501400  |
| C     | 1.36753400  | 2.84868400  | -0.29014500 | C     | 1.39815800  | 2.83541100  | -0.29363900 |
| H     | 2.31262200  | 3.37803400  | -0.23875000 | H     | 2.34914300  | 3.35455600  | -0.24482100 |
| C     | 1.32282900  | 1.51098800  | -0.65743700 | C     | 1.33870400  | 1.49838400  | -0.65929300 |
| C     | 0.07886000  | 0.80895000  | -0.70847800 | C     | 0.08742500  | 0.80713200  | -0.70515800 |
| C     | 1.59404800  | -0.94186100 | -1.33398200 | C     | 1.58328400  | -0.95723600 | -1.33577800 |
| C     | 3.78313000  | 0.14120400  | 0.16786500  | C     | 3.78389700  | 0.10641200  | 0.16930400  |
| C     | 4.14536400  | -0.22071600 | 2.53803100  | C     | 4.13324300  | -0.28652200 | 2.53672400  |
| C     | 5.14702700  | -0.07945500 | -0.05760100 | C     | 5.15212200  | -0.09315800 | -0.04940100 |
| C     | 5.50307200  | -0.44986400 | 2.30280800  | C     | 5.49603400  | -0.49288700 | 2.30831100  |
| C     | 6.00282700  | -0.37936500 | 1.00408400  | C     | 6.00436100  | -0.39641700 | 1.01451500  |
| H     | 5.54376100  | -0.01279800 | -1.06535700 | H     | 5.55495800  | -0.00912500 | -1.05336900 |
| H     | 7.05722900  | -0.54837300 | 0.81575800  | H     | 7.06210300  | -0.54934600 | 0.83150300  |
| P     | 2.71117600  | 0.51829300  | -1.30683100 | P     | 2.71658000  | 0.48961700  | -1.30701400 |
| C     | 0.28534300  | -0.61971200 | -0.91139300 | C     | 0.27783700  | -0.62213500 | -0.90867200 |
| C     | -0.60709500 | -1.72534900 | -0.63653800 | C     | -0.62676400 | -1.71966200 | -0.63678200 |
| C     | -0.24279200 | -3.04262700 | -1.07428800 | C     | -0.27700600 | -3.03827200 | -1.08379700 |
| C     | 1.01091600  | -3.27148300 | -1.66023200 | C     | 0.97289700  | -3.27767000 | -1.67282800 |
| C     | 1.93681100  | -2.23403900 | -1.73815500 | C     | 1.91129100  | -2.25033900 | -1.74693600 |
| H     | 1.27419400  | -4.26915700 | -1.99148300 | H     | 1.22435200  | -4.27653000 | -2.00952500 |
| H     | 2.93284700  | -2.43435300 | -2.11804400 | H     | 2.90442000  | -2.46058900 | -2.12903600 |
| C     | 3.29033100  | 0.07199800  | 1.47809800  | C     | 3.28218600  | 0.01047300  | 1.47470500  |
| H     | 6.16684100  | -0.67605700 | 3.12974200  | H     | 6.15656100  | -0.72308300 | 3.13668900  |
| H     | 3.75400500  | -0.26898100 | 3.54835300  | H     | 3.73487800  | -0.35697400 | 3.54294600  |
| H     | 2.23892000  | 0.25398300  | 1.67054500  | H     | 2.22658200  | 0.17259100  | 1.66219900  |
| H     | -2.45013700 | 0.11142200  | -1.62519300 | H     | -2.45250000 | 0.13396900  | -1.60601200 |
| N     | -3.66449000 | -2.50757000 | 1.29541700  | N     | -3.68584100 | -2.48484500 | 1.29742200  |
| C     | -4.47551700 | -3.65269300 | 1.71591800  | C     | -4.50470200 | -3.62538300 | 1.71687600  |
| H     | -3.84223900 | -4.45550300 | 2.09541100  | H     | -3.87523900 | -4.43981900 | 2.07635700  |
| H     | -5.14473700 | -3.33445300 | 2.51020000  | H     | -5.15706800 | -3.30799700 | 2.52531700  |
| H     | -5.07510300 | -4.03210300 | 0.88341400  | H     | -5.12153400 | -3.98617700 | 0.88883500  |
| C     | -4.04001800 | -1.18996800 | 1.81763300  | C     | -4.05359300 | -1.16677200 | 1.82317700  |
| H     | -5.07290000 | -1.23149700 | 2.15339000  | H     | -5.08679800 | -1.20352300 | 2.15828900  |
| H     | -3.40568000 | -0.91341100 | 2.66551900  | H     | -3.41792400 | -0.89748500 | 2.67229900  |
| H     | -3.95943500 | -0.42821900 | 1.04430800  | H     | -3.96835900 | -0.40392100 | 1.05152000  |
| C     | -2.29126200 | 4.96211100  | 0.49721300  | C     | -2.23684900 | 4.99096100  | 0.49188600  |
| N     | -2.27704300 | 6.03927300  | 0.94353000  | N     | -2.20935100 | 6.07135100  | 0.93055900  |
| H     | -4.51002700 | 1.43839900  | -1.39241000 | H     | -4.49798500 | 1.47968600  | -1.36919700 |
| ***** |             |             |             | ***** |             |             |             |

| 2-D-10-A-12P34-N-HEXANE |             |             |             | 2-D-12-A-12P34 |             |             |             |
|-------------------------|-------------|-------------|-------------|----------------|-------------|-------------|-------------|
| C                       | -2.52880200 | -2.71208500 | 0.49329300  | C              | -2.63751600 | -2.23916200 | 0.52669600  |
| C                       | -2.18523900 | -3.99917900 | -0.03448700 | C              | -2.42864300 | -3.52743400 | -0.06369200 |
| H                       | -2.81685100 | -4.85578500 | 0.14907100  | H              | -3.15058100 | -4.31907400 | 0.06876600  |
| C                       | -1.69632200 | -1.60936900 | 0.17394300  | C              | -1.67326200 | -1.22996500 | 0.28310600  |
| H                       | -1.91498600 | -0.64211500 | 0.59173700  | H              | -1.77727800 | -0.26758500 | 0.75018600  |
| C                       | -1.04255200 | -4.14729900 | -0.76339000 | C              | -1.30368300 | -3.76227700 | -0.79690700 |

|       |             |             |             |       |             |             |             |
|-------|-------------|-------------|-------------|-------|-------------|-------------|-------------|
| H     | -0.77106600 | -5.13028300 | -1.13262400 | H     | -1.13988200 | -4.74933900 | -1.21580200 |
| C     | -3.61120900 | 1.75858700  | -1.06384400 | C     | -3.24131000 | 2.39180300  | -0.41198900 |
| C     | -2.42336600 | 1.01530900  | -1.17440900 | C     | -2.13654100 | 1.55862000  | -0.74777100 |
| C     | -3.61669300 | 3.00926200  | -0.47588700 | C     | -3.00262700 | 3.63923000  | 0.20867700  |
| H     | -4.53818100 | 3.56861700  | -0.37048400 | H     | -3.84298700 | 4.27032200  | 0.47454200  |
| C     | -2.39989300 | 3.59270900  | -0.04266800 | C     | -1.71648200 | 4.05399800  | 0.45330000  |
| C     | -1.15132100 | 2.88578700  | -0.21000600 | H     | -1.53524200 | 5.03043800  | 0.88858100  |
| C     | -1.18962700 | 1.52567200  | -0.69230300 | C     | -0.58674300 | 3.22786500  | 0.14096600  |
| C     | 0.09395200  | 3.50865200  | 0.01887600  | C     | -0.82196500 | 1.90113600  | -0.38456900 |
| H     | 0.10520300  | 4.53883500  | 0.35634200  | C     | 0.72701700  | 3.70761800  | 0.27869800  |
| C     | 1.29685500  | 2.87387800  | -0.28446500 | H     | 0.87303800  | 4.71569500  | 0.65330800  |
| H     | 2.22776800  | 3.42667100  | -0.22610700 | C     | 1.82625400  | 2.95922300  | -0.14508900 |
| C     | 1.28621700  | 1.53565400  | -0.65793800 | H     | 2.81726500  | 3.39827000  | -0.15025400 |
| C     | 0.05878600  | 0.81025800  | -0.72281400 | C     | 1.62886200  | 1.64373400  | -0.55236900 |
| C     | 1.61988000  | -0.91065700 | -1.32930400 | C     | 0.33540300  | 1.04905500  | -0.54397700 |
| C     | 3.78046700  | 0.21986500  | 0.16235000  | C     | 1.66464500  | -0.80343600 | -1.29996900 |
| C     | 4.17015800  | -0.07502300 | 2.53662500  | C     | 4.01128600  | 0.06702400  | 0.08736700  |
| C     | 5.13561000  | -0.03883600 | -0.07463400 | C     | 4.49267100  | -0.34659900 | 2.42658700  |
| C     | 5.51726200  | -0.34638200 | 2.28984900  | C     | 5.32662600  | -0.29222600 | -0.22819200 |
| C     | 5.99910700  | -0.32802600 | 0.98293700  | C     | 5.79866700  | -0.71677300 | 2.10096600  |
| H     | 5.51945000  | -0.00600100 | -1.08922200 | C     | 6.21488400  | -0.68887900 | 0.77231500  |
| H     | 7.04686000  | -0.52616800 | 0.78549100  | H     | 5.65982400  | -0.25333200 | -1.26033000 |
| P     | 2.69848700  | 0.58021000  | -1.30978200 | H     | 7.23146300  | -0.96421400 | 0.51365500  |
| C     | 0.30334500  | -0.61664300 | -0.92150600 | P     | 2.89058000  | 0.56523600  | -1.31364300 |
| C     | -0.56054600 | -1.73953000 | -0.63659000 | C     | 0.41101600  | -0.39221600 | -0.81172700 |
| C     | -0.16226500 | -3.05548700 | -1.04377000 | C     | -0.55887000 | -1.43395900 | -0.55167100 |
| C     | 1.10158100  | -3.26295500 | -1.61833500 | C     | -0.31426000 | -2.76007000 | -1.03417600 |
| C     | 1.99733200  | -2.20254100 | -1.70899600 | C     | 0.90576100  | -3.07745500 | -1.66178800 |
| H     | 1.39388000  | -4.25909900 | -1.92969100 | C     | 1.89560300  | -2.11290400 | -1.74560300 |
| H     | 3.00125400  | -2.38187300 | -2.07891100 | H     | 1.07746400  | -4.08368200 | -2.02585000 |
| C     | 3.30645600  | 0.20502700  | 1.48063000  | H     | 2.86186000  | -2.37075500 | -2.16659700 |
| H     | 6.18803000  | -0.56164600 | 3.11415500  | C     | 3.60408400  | 0.04205300  | 1.42769500  |
| H     | 3.79368600  | -0.07830200 | 3.55383800  | H     | 6.48903600  | -1.01710300 | 2.88139700  |
| H     | 2.26380800  | 0.42478400  | 1.68065000  | H     | 4.16786600  | -0.35845600 | 3.46147900  |
| H     | -2.44497800 | 0.06189800  | -1.68244200 | H     | 2.59430500  | 0.33802600  | 1.68851400  |
| N     | -3.62139000 | -2.54581300 | 1.28550500  | H     | -2.33098100 | 0.64731000  | -1.29229100 |
| C     | -4.41000000 | -3.69876600 | 1.71955000  | N     | -3.74301900 | -2.00335100 | 1.29418900  |
| H     | -3.76873300 | -4.46483300 | 2.16028300  | C     | -4.12387800 | -0.68266800 | 1.79760300  |
| H     | -5.12524200 | -3.37358500 | 2.47019300  | H     | -4.86598800 | -0.22346100 | 1.13457500  |
| H     | -4.96049300 | -4.13639400 | 0.88109800  | H     | -4.55520500 | -0.80142700 | 2.79249300  |
| C     | -4.01858900 | -1.22571800 | 1.78635800  | H     | -3.27039900 | -0.01805000 | 1.87035100  |
| H     | -5.05748800 | -1.27233900 | 2.10408300  | C     | -4.75573600 | -3.04335000 | 1.46473900  |
| H     | -3.40290200 | -0.93113500 | 2.64246300  | H     | -5.52520200 | -2.67287700 | 2.13733800  |
| H     | -3.93129100 | -0.47018200 | 1.00772800  | H     | -5.22583500 | -3.29634200 | 0.50919700  |
| C     | -2.41110100 | 4.88766800  | 0.51614900  | H     | -4.31884500 | -3.94601800 | 1.89735900  |
| N     | -2.42231500 | 5.95446600  | 0.98322300  | C     | -4.55432300 | 1.91866500  | -0.61856900 |
| H     | -4.53600400 | 1.34622900  | -1.45329900 | N     | -5.61613100 | 1.45466200  | -0.74132100 |
| ***** |             |             |             | ***** |             |             |             |

|                     |             |             |             |                    |             |             |             |
|---------------------|-------------|-------------|-------------|--------------------|-------------|-------------|-------------|
| 2-D-12-A-12P34-CCI4 |             |             |             | 2-D-12-A-12P34-DCM |             |             |             |
| C                   | -2.55419100 | -2.33071100 | 0.52343100  | C                  | -2.54679900 | -2.35045200 | 0.52732100  |
| C                   | -2.36743100 | -3.57118500 | -0.16905900 | C                  | -2.37574400 | -3.57397500 | -0.19988200 |
| H                   | -3.07476800 | -4.37854700 | -0.05099400 | H                  | -3.07635300 | -4.38666200 | -0.07986600 |

|       |             |             |             |       |             |             |             |
|-------|-------------|-------------|-------------|-------|-------------|-------------|-------------|
| C     | -1.63092200 | -1.28090400 | 0.28378100  | C     | -1.63323400 | -1.29077600 | 0.28601100  |
| H     | -1.72737500 | -0.35698100 | 0.82761000  | H     | -1.72924600 | -0.37501500 | 0.84423800  |
| C     | -1.28164100 | -3.73724200 | -0.97606600 | C     | -1.30573800 | -3.72266600 | -1.03036100 |
| H     | -1.12870400 | -4.68949700 | -1.47218000 | H     | -1.16055100 | -4.66484900 | -1.54725200 |
| C     | -3.30585800 | 2.37568100  | -0.42828100 | C     | -3.30186700 | 2.40162900  | -0.42222200 |
| C     | -2.19029300 | 1.53890200  | -0.70929700 | C     | -2.19222400 | 1.55599400  | -0.69508800 |
| C     | -3.10019100 | 3.59951400  | 0.25161500  | C     | -3.09362300 | 3.61620500  | 0.27816200  |
| H     | -3.95214400 | 4.22696500  | 0.48761900  | H     | -3.94207100 | 4.24812800  | 0.51479200  |
| C     | -1.82950800 | 4.00098400  | 0.58271000  | C     | -1.82390900 | 4.00138600  | 0.62725000  |
| H     | -1.67277100 | 4.96018300  | 1.06369000  | H     | -1.66446600 | 4.95164500  | 1.12494700  |
| C     | -0.68259900 | 3.19834300  | 0.27336100  | C     | -0.67979100 | 3.19698800  | 0.31056300  |
| C     | -0.88902300 | 1.88830100  | -0.30425800 | C     | -0.89251000 | 1.89368300  | -0.28233700 |
| C     | 0.62136400  | 3.69318000  | 0.45339100  | C     | 0.62529200  | 3.68542500  | 0.49589600  |
| H     | 0.74527700  | 4.68654700  | 0.87249100  | H     | 0.75482800  | 4.67179100  | 0.92936500  |
| C     | 1.73874200  | 2.98488300  | 0.00321000  | C     | 1.73891400  | 2.97723700  | 0.03045100  |
| H     | 2.72036100  | 3.44451400  | 0.02573900  | C     | 2.72233100  | 3.43318400  | 0.05777500  |
| C     | 1.57121100  | 1.68958200  | -0.47200600 | C     | 1.56721200  | 1.69071500  | -0.46321400 |
| C     | 0.28837400  | 1.06630500  | -0.49135500 | C     | 0.28220800  | 1.06586200  | -0.48322400 |
| C     | 1.64569400  | -0.71106300 | -1.36490700 | C     | 1.63191000  | -0.69943200 | -1.38518100 |
| C     | 3.98348600  | 0.12153300  | 0.07381200  | C     | 3.97555400  | 0.11505000  | 0.06854400  |
| C     | 4.46820100  | -0.44255800 | 2.38141600  | C     | 4.44399600  | -0.51905200 | 2.36195100  |
| C     | 5.31356700  | -0.16282900 | -0.25671200 | C     | 5.31886200  | -0.11418900 | -0.25162800 |
| C     | 5.79031100  | -0.73533400 | 2.04038400  | C     | 5.78091100  | -0.75375900 | 2.03154200  |
| C     | 6.21204700  | -0.59495200 | 0.72025000  | C     | 6.21727700  | -0.55101300 | 0.72401700  |
| H     | 5.65024000  | -0.03973300 | -1.28098300 | H     | 5.66608500  | 0.05248700  | -1.26602700 |
| H     | 7.23986400  | -0.81124100 | 0.45040700  | H     | 7.25520400  | -0.72458800 | 0.46251700  |
| P     | 2.85037300  | 0.67546700  | -1.29585100 | P     | 2.84315000  | 0.67893200  | -1.29683900 |
| C     | 0.39057800  | -0.34834000 | -0.83448000 | C     | 0.37745700  | -0.33951700 | -0.83932400 |
| C     | -0.55803100 | -1.41676900 | -0.61093400 | C     | -0.57451200 | -1.40995200 | -0.62446100 |
| C     | -0.31265800 | -2.70616800 | -1.18533000 | C     | -0.33782200 | -2.68809100 | -1.23051200 |
| C     | 0.89257600  | -2.96215500 | -1.86343600 | C     | 0.85883300  | -2.93314600 | -1.92455500 |
| C     | 1.87755300  | -1.98285400 | -1.90118700 | C     | 1.85247300  | -1.95759500 | -1.94996100 |
| H     | 1.06692200  | -3.93864200 | -2.29977700 | H     | 1.02540600  | -3.90121600 | -2.38203900 |
| H     | 2.83630200  | -2.20626000 | -2.35727900 | H     | 2.80582000  | -2.17857300 | -2.41816700 |
| C     | 3.57018300  | -0.01759800 | 1.40557200  | C     | 3.54682700  | -0.08798700 | 1.38765300  |
| H     | 6.48801900  | -1.06408700 | 2.80254200  | H     | 6.47766500  | -1.08786700 | 2.79212600  |
| H     | 4.13833200  | -0.54346600 | 3.40977200  | H     | 4.10196100  | -0.67118400 | 3.37987000  |
| H     | 2.54750100  | 0.21570600  | 1.67963600  | H     | 2.51222200  | 0.09650900  | 1.65442400  |
| H     | -2.35774500 | 0.63352300  | -1.27366500 | H     | -2.36390900 | 0.64811200  | -1.25464900 |
| N     | -3.58683900 | -2.16117400 | 1.39099500  | N     | -3.55134600 | -2.20519700 | 1.42736400  |
| C     | -4.48188800 | -3.27280200 | 1.71135600  | C     | -4.46238500 | -3.31567500 | 1.71222700  |
| H     | -3.91323600 | -4.15409300 | 2.01482100  | H     | -3.90668700 | -4.20006500 | 2.03159300  |
| H     | -5.12859700 | -2.97798900 | 2.53307700  | H     | -5.13699300 | -3.02153900 | 2.51035000  |
| H     | -5.10743800 | -3.53108600 | 0.85149200  | H     | -5.05508900 | -3.56757500 | 0.82883400  |
| C     | -3.83239500 | -0.87974800 | 2.05902000  | C     | -3.73449100 | -0.95618000 | 2.17270800  |
| H     | -4.85237100 | -0.87228300 | 2.43473500  | H     | -4.67720700 | -1.00464500 | 2.70957200  |
| H     | -3.14521600 | -0.74154600 | 2.90027900  | H     | -2.92543100 | -0.81359300 | 2.89504900  |
| H     | -3.72085200 | -0.05065200 | 1.36360100  | H     | -3.76541500 | -0.10176200 | 1.49696900  |
| C     | -4.60760400 | 1.97372200  | -0.79974600 | C     | -4.59950700 | 2.03307700  | -0.83406700 |
| N     | -5.67675000 | 1.61693900  | -1.09419500 | N     | -5.66962100 | 1.71870200  | -1.17329300 |
| ***** |             |             |             | ***** |             |             |             |

|                     |             |             |             |                         |             |             |             |
|---------------------|-------------|-------------|-------------|-------------------------|-------------|-------------|-------------|
| 2-D-12-A-12P34-DMSO |             |             |             | 2-D-12-A-12P34-n-hexane |             |             |             |
| C                   | -2.54494200 | -2.35611900 | 0.52641400  | C                       | -2.55811700 | -2.32251600 | 0.51621700  |
| C                   | -2.37838400 | -3.57426600 | -0.21126000 | C                       | -2.36129000 | -3.57018800 | -0.16058000 |

|       |             |             |             |       |             |             |             |
|-------|-------------|-------------|-------------|-------|-------------|-------------|-------------|
| H     | -3.07743300 | -4.38834100 | -0.09185900 | H     | -3.07203500 | -4.37519600 | -0.04602900 |
| C     | -1.63439200 | -1.29325800 | 0.28469800  | C     | -1.63208100 | -1.27557700 | 0.27713000  |
| H     | -1.72883700 | -0.38112500 | 0.84930000  | H     | -1.72584300 | -0.35074900 | 0.81949100  |
| C     | -1.31353400 | -3.71720600 | -1.04918700 | C     | -1.26945800 | -3.74179200 | -0.95815200 |
| H     | -1.17104600 | -4.65599100 | -1.57284500 | H     | -1.11322000 | -4.69730700 | -1.44699100 |
| C     | -3.29988600 | 2.41025600  | -0.41862200 | C     | -3.30434600 | 2.36880300  | -0.42604400 |
| C     | -2.19219200 | 1.56276500  | -0.69135900 | C     | -2.18657800 | 1.53679300  | -0.71450500 |
| C     | -3.09080200 | 3.62072100  | 0.29017000  | C     | -3.09923900 | 3.59283700  | 0.25318700  |
| H     | -3.93819000 | 4.25299100  | 0.52954000  | H     | -3.95227200 | 4.21733900  | 0.49310600  |
| C     | -1.82119100 | 4.00066200  | 0.64413100  | C     | -1.82841200 | 3.99846200  | 0.57894900  |
| H     | -1.66089200 | 4.94703000  | 1.14892600  | H     | -1.67263200 | 4.95815600  | 1.05921800  |
| C     | -0.67806500 | 3.19650800  | 0.32308700  | C     | -0.68031800 | 3.19810500  | 0.26745200  |
| C     | -0.89297700 | 1.89602200  | -0.27606900 | C     | -0.88518700 | 1.88793500  | -0.30998600 |
| C     | 0.62746800  | 3.68280700  | 0.50981800  | C     | 0.62308700  | 3.69454900  | 0.44630800  |
| H     | 0.75917400  | 4.66622600  | 0.94916200  | H     | 0.74572700  | 4.68862800  | 0.86414400  |
| C     | 1.73960800  | 2.97482900  | 0.03819000  | C     | 1.74140500  | 2.98693900  | -0.00167100 |
| H     | 2.72367200  | 3.42946900  | 0.06744900  | H     | 2.72264900  | 3.44727600  | 0.02057600  |
| C     | 1.56661800  | 1.69160800  | -0.46213900 | C     | 1.57485200  | 1.69007700  | -0.47380000 |
| C     | 0.28064000  | 1.06598000  | -0.48240400 | C     | 0.29264200  | 1.06727200  | -0.49456400 |
| C     | 1.62810100  | -0.69533200 | -1.39278300 | C     | 1.65243800  | -0.71350200 | -1.35866900 |
| C     | 3.97281600  | 0.11288700  | 0.06792400  | C     | 3.98790200  | 0.12357200  | 0.07679900  |
| C     | 4.43432100  | -0.54421200 | 2.35647700  | C     | 4.47509100  | -0.42620500 | 2.38720200  |
| C     | 5.32024300  | -0.09877600 | -0.24731300 | C     | 5.31498300  | -0.17285600 | -0.25507400 |
| C     | 5.77584500  | -0.76020700 | 2.03121700  | C     | 5.79389500  | -0.73158600 | 2.04480900  |
| C     | 6.21771700  | -0.53725200 | 0.72869500  | C     | 6.21292200  | -0.60434100 | 0.72255300  |
| H     | 5.67146900  | 0.08164200  | -1.25792900 | H     | 5.64981400  | -0.05912700 | -1.28105600 |
| H     | 7.25875700  | -0.69736500 | 0.47117000  | H     | 7.23841900  | -0.83007200 | 0.45156200  |
| P     | 2.84202300  | 0.67980800  | -1.29724800 | P     | 2.85523700  | 0.67507500  | -1.29424400 |
| C     | 0.37341200  | -0.33598300 | -0.84200700 | C     | 0.39650200  | -0.34996700 | -0.83388200 |
| C     | -0.58003000 | -1.40707800 | -0.63018800 | C     | -0.55175400 | -1.41758600 | -0.60886100 |
| C     | -0.34601600 | -2.68150100 | -1.24648600 | C     | -0.30144600 | -2.71088500 | -1.17116500 |
| C     | 0.84785400  | -2.92296900 | -1.94549500 | C     | 0.90745900  | -2.97041600 | -1.84246600 |
| C     | 1.84467000  | -1.94868800 | -1.96687700 | C     | 1.88921600  | -1.98954200 | -1.88476500 |
| H     | 1.01211800  | -3.88839300 | -2.40935400 | H     | 1.08528100  | -3.95018800 | -2.26999500 |
| H     | 2.79633600  | -2.16932000 | -2.43863700 | H     | 2.85024600  | -2.21366800 | -2.33571900 |
| C     | 3.53825600  | -0.11095500 | 1.38194200  | C     | 3.57741100  | -0.00222000 | 1.41069300  |
| H     | 6.47154300  | -1.09638200 | 2.79180200  | H     | 6.49131900  | -1.05957700 | 2.80757200  |
| H     | 4.08775900  | -0.71323200 | 3.37014400  | H     | 4.14750300  | -0.51646600 | 3.41729100  |
| H     | 2.49992700  | 0.05737000  | 1.64507400  | H     | 2.55738200  | 0.24141300  | 1.68560100  |
| H     | -2.36558600 | 0.65452000  | -1.25002400 | H     | -2.35263100 | 0.63402100  | -1.28337300 |
| N     | -3.54072900 | -2.21942500 | 1.43606000  | N     | -3.60294000 | -2.14973200 | 1.36970500  |
| C     | -4.44488200 | -3.33533500 | 1.72426700  | C     | -4.46547500 | -3.27107200 | 1.73878300  |
| H     | -3.88218400 | -4.21826700 | 2.03473300  | H     | -3.87203500 | -4.14957300 | 1.99501300  |
| H     | -5.11323300 | -3.04743300 | 2.52972700  | H     | -5.05478100 | -2.98605100 | 2.60714800  |
| H     | -5.04379800 | -3.58583300 | 0.84487400  | H     | -5.14973500 | -3.52541700 | 0.92278100  |
| C     | -3.71670800 | -0.97778400 | 2.19522600  | C     | -3.92917000 | -0.85540400 | 1.97224400  |
| H     | -4.65044700 | -1.03469500 | 2.74655700  | H     | -5.00656000 | -0.80512900 | 2.12299000  |
| H     | -2.89691700 | -0.83871800 | 2.90583000  | H     | -3.43147900 | -0.74358500 | 2.94154100  |
| H     | -3.76121200 | -0.11766800 | 1.52723700  | H     | -3.64446700 | -0.03515900 | 1.32021700  |
| C     | -4.59610700 | 2.05230500  | -0.84256100 | C     | -4.60680700 | 1.95968100  | -0.78777700 |
| N     | -5.66585600 | 1.75139700  | -1.19566100 | N     | -5.67562400 | 1.59374500  | -1.07164900 |
| ***** |             |             |             | ***** |             |             |             |

## Triplet Optimized geometry co-ordinates:

|              |           |           |           |               |           |           |           |
|--------------|-----------|-----------|-----------|---------------|-----------|-----------|-----------|
| C1234-t3     |           |           |           | C1234-t3-CCl4 |           |           |           |
| C            | -2.476457 | -3.731285 | -1.118008 | C             | -2.477615 | -3.732996 | -1.117144 |
| C            | -1.709803 | -2.824454 | -1.864137 | C             | -1.707978 | -2.827014 | -1.861836 |
| H            | -1.223571 | -3.151500 | -2.776686 | H             | -1.219033 | -3.155017 | -2.772572 |
| C            | -3.165870 | -3.280048 | 0.007159  | C             | -3.169289 | -3.280681 | 0.006679  |
| H            | -3.802444 | -3.961898 | 0.561624  | H             | -3.807739 | -3.961664 | 0.559987  |
| C            | -1.582975 | -1.508610 | -1.458867 | C             | -1.580871 | -1.510804 | -1.456604 |
| H            | -1.025422 | -0.817358 | -2.073203 | H             | -1.019760 | -0.821285 | -2.069699 |
| C            | -3.085583 | -1.946002 | 0.425851  | C             | -3.088428 | -1.946153 | 0.425026  |
| C            | -2.219301 | -1.027337 | -0.270758 | C             | -2.219898 | -1.028259 | -0.270277 |
| C            | -3.896137 | -1.463205 | 1.511518  | C             | -3.901144 | -1.462764 | 1.509422  |
| H            | -4.522610 | -2.171697 | 2.043003  | H             | -4.528932 | -2.170836 | 2.039834  |
| C            | -3.938692 | -0.141882 | 1.810078  | C             | -3.943739 | -0.140930 | 1.807416  |
| H            | -4.616384 | 0.232445  | 2.570380  | H             | -4.622878 | 0.234032  | 2.566098  |
| C            | -3.102815 | 0.804597  | 1.122937  | C             | -3.106085 | 0.805006  | 1.120997  |
| C            | -2.103013 | 0.318700  | 0.195915  | C             | -2.104250 | 0.318431  | 0.195965  |
| C            | -3.280789 | 2.173353  | 1.281940  | C             | -3.284613 | 2.174164  | 1.279134  |
| H            | -4.059762 | 2.533083  | 1.945374  | H             | -4.064485 | 2.534404  | 1.941150  |
| C            | -2.493316 | 3.100491  | 0.557610  | C             | -2.496171 | 3.100987  | 0.555040  |
| H            | -2.700294 | 4.161463  | 0.640814  | H             | -2.703530 | 4.161924  | 0.637280  |
| C            | -1.390780 | 2.675110  | -0.181166 | C             | -1.392097 | 2.675017  | -0.182008 |
| C            | -1.089070 | 1.272143  | -0.250621 | C             | -1.089556 | 1.271707  | -0.249462 |
| C            | -0.511504 | 3.642071  | -0.809165 | C             | -0.512867 | 3.642090  | -0.810326 |
| H            | -0.843174 | 4.673983  | -0.840624 | H             | -0.844591 | 4.673920  | -0.842607 |
| C            | 0.722442  | 3.291077  | -1.333903 | C             | 0.721862  | 3.290572  | -1.334345 |
| H            | 1.363100  | 4.038369  | -1.788371 | H             | 1.362623  | 4.037534  | -1.789197 |
| C            | 1.160387  | 1.956576  | -1.204880 | C             | 1.160008  | 1.956116  | -1.203359 |
| C            | 0.252952  | 0.927261  | -0.620927 | C             | 0.253071  | 0.927097  | -0.618079 |
| C            | 2.381565  | 1.368170  | -1.472419 | C             | 2.381562  | 1.367963  | -1.470359 |
| H            | 3.250527  | 1.857463  | -1.891295 | H             | 3.249430  | 1.857027  | -1.891823 |
| H            | -2.561817 | -4.764991 | -1.431990 | H             | -2.563216 | -4.766735 | -1.430951 |
| C            | 0.971468  | -0.237205 | -0.482695 | C             | 0.972350  | -0.236868 | -0.477988 |
| C            | 3.482398  | -0.444946 | -0.059106 | C             | 3.484311  | -0.444465 | -0.057565 |
| C            | 3.572042  | 0.187044  | 1.187474  | C             | 3.571987  | 0.182130  | 1.192210  |
| C            | 4.433044  | -1.412899 | -0.390547 | C             | 4.439503  | -1.406531 | -0.394664 |
| C            | 4.589274  | -0.142622 | 2.077901  | C             | 4.591778  | -0.146875 | 2.080689  |
| H            | 2.838425  | 0.938960  | 1.457873  | H             | 2.835443  | 0.929410  | 1.467694  |
| C            | 5.454479  | -1.745237 | 0.500583  | C             | 5.463553  | -1.738122 | 0.494358  |
| H            | 4.375053  | -1.912741 | -1.352389 | H             | 4.383246  | -1.902049 | -1.358733 |
| C            | 5.535365  | -1.110896 | 1.737237  | C             | 5.542545  | -1.109152 | 1.734437  |
| H            | 4.644400  | 0.354947  | 3.039909  | H             | 4.645192  | 0.346440  | 3.044976  |
| H            | 6.183660  | -2.499812 | 0.226815  | H             | 6.196122  | -2.487822 | 0.216290  |
| H            | 6.327145  | -1.367814 | 2.431850  | H             | 6.336131  | -1.365527 | 2.427201  |
| H            | 0.630148  | -1.155950 | -0.030976 | H             | 0.631739  | -1.155459 | -0.025299 |
| C            | 2.367480  | -0.075802 | -1.035286 | C             | 2.367624  | -0.075716 | -1.032118 |
| H            | 2.482273  | -0.731936 | -1.914422 | H             | 2.480926  | -0.731991 | -1.911053 |
|              | *****     |           |           |               | *****     |           |           |
| C1234-t3-DCM |           |           |           | C1234-t3-DMSO |           |           |           |
| C            | -2.470507 | -3.737561 | -1.115438 | C             | -2.463598 | -3.740516 | -1.114408 |
| C            | -1.698286 | -2.831493 | -1.857944 | C             | -1.690946 | -2.833825 | -1.855880 |

|       |           |           |           |       |           |           |           |
|-------|-----------|-----------|-----------|-------|-----------|-----------|-----------|
| H     | -1.204183 | -3.160085 | -2.765610 | H     | -1.194011 | -3.162283 | -2.762000 |
| C     | -3.166947 | -3.284841 | 0.005750  | C     | -3.162790 | -3.288137 | 0.005392  |
| H     | -3.806785 | -3.965827 | 0.557348  | H     | -3.802741 | -3.969658 | 0.556147  |
| C     | -1.573885 | -1.514411 | -1.453276 | C     | -1.569046 | -1.516196 | -1.451611 |
| H     | -1.008905 | -0.826453 | -2.064621 | H     | -1.002854 | -0.828531 | -2.062185 |
| C     | -3.088297 | -1.949463 | 0.423358  | C     | -3.086365 | -1.952314 | 0.422614  |
| C     | -2.218051 | -1.031099 | -0.269826 | C     | -2.216003 | -1.033055 | -0.269539 |
| C     | -3.905580 | -1.466513 | 1.505256  | C     | -3.906301 | -1.470168 | 1.503181  |
| H     | -4.534453 | -2.174973 | 2.033765  | H     | -4.535274 | -2.179257 | 2.030686  |
| C     | -3.950702 | -0.144143 | 1.802375  | C     | -3.953628 | -0.147612 | 1.799884  |
| H     | -4.633096 | 0.230655  | 2.558166  | H     | -4.637953 | 0.226637  | 2.554170  |
| C     | -3.111670 | 0.802440  | 1.117801  | C     | -3.114536 | 0.799890  | 1.116407  |
| C     | -2.105789 | 0.316764  | 0.195920  | C     | -2.106333 | 0.315440  | 0.196043  |
| C     | -3.292997 | 2.171735  | 1.275275  | C     | -3.298070 | 2.169077  | 1.273819  |
| H     | -4.074908 | 2.530975  | 1.935318  | H     | -4.081265 | 2.527113  | 1.932949  |
| C     | -2.504115 | 3.099678  | 0.552813  | C     | -2.509475 | 3.098194  | 0.552527  |
| H     | -2.713571 | 4.160213  | 0.634193  | H     | -2.720552 | 4.158396  | 0.633725  |
| C     | -1.396948 | 2.674966  | -0.181395 | C     | -1.400532 | 2.674949  | -0.180328 |
| C     | -1.091430 | 1.271604  | -0.247232 | C     | -1.092797 | 1.271760  | -0.245863 |
| C     | -0.518713 | 3.643713  | -0.808798 | C     | -0.523310 | 3.645142  | -0.806914 |
| H     | -0.851679 | 4.675086  | -0.840959 | H     | -0.857424 | 4.676127  | -0.838523 |
| C     | 0.717562  | 3.293751  | -1.332011 | C     | 0.713832  | 3.296867  | -1.330010 |
| H     | 1.357426  | 4.041589  | -1.786597 | H     | 1.352737  | 4.045656  | -1.784313 |
| C     | 1.157708  | 1.959916  | -1.199739 | C     | 1.155705  | 1.963562  | -1.197697 |
| C     | 0.252526  | 0.929598  | -0.613831 | C     | 0.251941  | 0.931930  | -0.611782 |
| C     | 2.380180  | 1.373619  | -1.467080 | C     | 2.378812  | 1.378867  | -1.465667 |
| H     | 3.245565  | 1.863553  | -1.892652 | H     | 3.242639  | 1.869784  | -1.893272 |
| H     | -2.553870 | -4.771665 | -1.428557 | H     | -2.544947 | -4.774898 | -1.427083 |
| C     | 0.974230  | -0.233103 | -0.473151 | C     | 0.975431  | -0.229885 | -0.471560 |
| C     | 3.486763  | -0.440109 | -0.057438 | C     | 3.487853  | -0.436383 | -0.058419 |
| C     | 3.580750  | 0.189040  | 1.191012  | C     | 3.590718  | 0.200461  | 1.185607  |
| C     | 4.437281  | -1.407032 | -0.395534 | C     | 4.429374  | -1.413593 | -0.392716 |
| C     | 4.601987  | -0.142148 | 2.077856  | C     | 4.611734  | -0.133244 | 2.072101  |
| H     | 2.848887  | 0.940611  | 1.467680  | H     | 2.866499  | 0.960544  | 1.459325  |
| C     | 5.462665  | -1.740886 | 0.491764  | C     | 5.454387  | -1.750111 | 0.494254  |
| H     | 4.376687  | -1.903964 | -1.358451 | H     | 4.362194  | -1.916146 | -1.352195 |
| C     | 5.547952  | -1.109493 | 1.730812  | C     | 5.548540  | -1.111090 | 1.728981  |
| H     | 4.660434  | 0.353409  | 3.040692  | H     | 4.677325  | 0.368606  | 3.031208  |
| H     | 6.191488  | -2.493934 | 0.212985  | H     | 6.176197  | -2.510936 | 0.218414  |
| H     | 6.342615  | -1.367529 | 2.421705  | H     | 6.343096  | -1.371034 | 2.419268  |
| H     | 0.635370  | -1.152834 | -0.021392 | H     | 0.637922  | -1.150726 | -0.021034 |
| C     | 2.368206  | -0.070149 | -1.029572 | C     | 2.368620  | -0.065098 | -1.029307 |
| H     | 2.479624  | -0.725088 | -1.909380 | H     | 2.479114  | -0.718874 | -1.909936 |
| ***** |           |           |           | ***** |           |           |           |

|                   |           |           |           |          |          |           |           |
|-------------------|-----------|-----------|-----------|----------|----------|-----------|-----------|
| C1234-t3-n-hexane |           |           |           | 1C234-t7 |          |           |           |
| C                 | -2.478028 | -3.732461 | -1.117375 | C        | 5.518034 | 1.007644  | 0.096408  |
| C                 | -1.708913 | -2.826396 | -1.862384 | C        | 4.464794 | 1.722538  | -0.509380 |
| H                 | -1.220672 | -3.154247 | -2.773558 | H        | 4.637544 | 2.714385  | -0.909825 |
| C                 | -3.169074 | -3.280301 | 0.006820  | C        | 5.303394 | -0.278432 | 0.538126  |
| H                 | -3.807187 | -3.961390 | 0.560400  | H        | 6.117304 | -0.857584 | 0.961077  |
| C                 | -1.581618 | -1.510287 | -1.457102 | C        | 3.184018 | 1.146322  | -0.600180 |
| H                 | -1.021179 | -0.820466 | -2.070462 | H        | 2.399090 | 1.698329  | -1.097105 |
| C                 | -3.088090 | -1.945897 | 0.425264  | C        | 4.022643 | -0.897319 | 0.409430  |
| C                 | -2.219959 | -1.027943 | -0.270355 | C        | 2.916022 | -0.127363 | -0.092822 |

|       |           |           |           |       |           |           |           |
|-------|-----------|-----------|-----------|-------|-----------|-----------|-----------|
| C     | -3.900184 | -1.462545 | 1.510034  | C     | 3.861935  | -2.298496 | 0.665732  |
| H     | -4.527702 | -2.170653 | 2.040736  | H     | 4.712098  | -2.857544 | 1.041426  |
| C     | -3.942586 | -0.140813 | 1.808167  | C     | 2.696888  | -2.934649 | 0.356738  |
| H     | -4.621315 | 0.234083  | 2.567253  | H     | 2.608266  | -4.009610 | 0.470325  |
| C     | -3.105268 | 0.805153  | 1.121505  | C     | 1.543534  | -2.202727 | -0.103366 |
| C     | -2.103973 | 0.318588  | 0.195990  | C     | 1.592696  | -0.754210 | -0.160084 |
| C     | -3.283536 | 2.174253  | 1.279765  | C     | 0.358111  | -2.898049 | -0.454577 |
| H     | -4.063136 | 2.534507  | 1.942115  | H     | 0.368877  | -3.982607 | -0.438132 |
| C     | -2.495269 | 3.101036  | 0.555502  | C     | -0.789867 | -2.217298 | -0.805780 |
| H     | -2.702454 | 4.162003  | 0.637890  | H     | -1.689687 | -2.749532 | -1.091619 |
| C     | -1.391593 | 2.675049  | -0.181958 | C     | -0.793378 | -0.806513 | -0.707184 |
| C     | -1.089349 | 1.271783  | -0.249738 | C     | 0.360041  | -0.079977 | -0.322811 |
| C     | -0.512293 | 3.641971  | -0.810330 | C     | -1.412399 | 1.442334  | -0.488676 |
| H     | -0.843926 | 4.673842  | -0.842557 | H     | 6.499206  | 1.460039  | 0.187093  |
| C     | 0.722234  | 3.290405  | -1.334500 | C     | -3.273108 | -0.296487 | -0.288463 |
| H     | 1.363033  | 4.037350  | -1.789336 | C     | -4.543271 | -0.810056 | 1.713268  |
| C     | 1.160230  | 1.955903  | -1.203832 | C     | -4.414861 | -0.550685 | -1.051744 |
| C     | 0.253107  | 0.926955  | -0.618727 | C     | -5.679080 | -1.062006 | 0.941363  |
| C     | 2.381658  | 1.367569  | -1.470896 | C     | -5.611932 | -0.931516 | -0.442941 |
| H     | 3.249834  | 1.856581  | -1.891776 | H     | -4.368971 | -0.450852 | -2.131812 |
| H     | -2.563782 | -4.766165 | -1.431261 | H     | -6.488262 | -1.125227 | -1.051665 |
| C     | 0.972130  | -0.237168 | -0.478892 | C     | -0.072707 | 1.326575  | -0.102820 |
| C     | 3.483908  | -0.444830 | -0.057787 | C     | 0.556913  | 2.424742  | 0.516157  |
| C     | 3.571595  | 0.182521  | 1.191538  | C     | -0.162279 | 3.652246  | 0.653958  |
| C     | 4.438641  | -1.407565 | -0.393965 | C     | -1.469584 | 3.773040  | 0.206155  |
| C     | 4.590962  | -0.146422 | 2.080382  | C     | -2.124031 | 2.667200  | -0.364280 |
| H     | 2.835269  | 0.930302  | 1.466193  | H     | 1.558038  | 2.349117  | 0.913699  |
| C     | 5.462265  | -1.739101 | 0.495450  | H     | 0.329929  | 4.497354  | 1.121515  |
| H     | 4.382309  | -1.903726 | -1.357722 | H     | -1.995638 | 4.714795  | 0.313424  |
| C     | 5.541265  | -1.109367 | 1.735031  | H     | -3.159185 | 2.732690  | -0.677357 |
| H     | 4.644407  | 0.347476  | 3.044370  | C     | -3.351638 | -0.431141 | 1.103592  |
| H     | 6.194505  | -2.489384 | 0.218083  | H     | -6.607166 | -1.357639 | 1.417483  |
| H     | 6.334548  | -1.365697 | 2.428157  | H     | -4.587770 | -0.909413 | 2.792220  |
| H     | 0.631309  | -1.155701 | -0.026270 | H     | -2.472558 | -0.237620 | 1.709147  |
| C     | 2.367566  | -0.076128 | -1.032716 | C     | -1.965392 | 0.115825  | -0.954146 |
| H     | 2.481169  | -0.732505 | -1.911595 | H     | -2.154094 | 0.161658  | -2.039936 |
| ***** |           |           |           | ***** |           |           |           |

|               |          |           |           |              |          |           |           |
|---------------|----------|-----------|-----------|--------------|----------|-----------|-----------|
| 1C234-t7-CCI4 |          |           |           | 1C234-t6-DCM |          |           |           |
| C             | 5.518671 | 1.007857  | 0.100351  | C            | 5.495690 | 1.001302  | 0.120257  |
| C             | 4.465622 | 1.724026  | -0.505241 | C            | 4.436336 | 1.733490  | -0.443387 |
| H             | 4.638515 | 2.716774  | -0.903317 | H            | 4.610214 | 2.735153  | -0.820032 |
| C             | 5.303686 | -0.279149 | 0.540556  | C            | 5.281526 | -0.303029 | 0.515992  |
| H             | 6.117275 | -0.859005 | 0.963078  | H            | 6.102400 | -0.901412 | 0.897090  |
| C             | 3.184584 | 1.147895  | -0.597585 | C            | 3.174019 | 1.177673  | -0.536279 |
| H             | 2.400125 | 1.701646  | -1.093302 | H            | 2.388255 | 1.746157  | -1.011536 |
| C             | 4.022462 | -0.897632 | 0.410211  | C            | 4.007455 | -0.903560 | 0.392810  |
| C             | 2.916000 | -0.126713 | -0.092053 | C            | 2.901447 | -0.129150 | -0.070971 |
| C             | 3.861974 | -2.299547 | 0.665168  | C            | 3.841051 | -2.306688 | 0.633002  |
| H             | 4.711896 | -2.858863 | 1.040879  | H            | 4.690397 | -2.877685 | 0.992331  |
| C             | 2.696875 | -2.935418 | 0.354051  | C            | 2.669313 | -2.921983 | 0.331306  |
| H             | 2.608010 | -4.010570 | 0.465410  | H            | 2.570797 | -3.997755 | 0.429565  |
| C             | 1.543796 | -2.202520 | -0.105839 | C            | 1.522440 | -2.176865 | -0.104825 |
| C             | 1.592275 | -0.753476 | -0.160475 | C            | 1.584214 | -0.748743 | -0.166926 |
| C             | 0.358933 | -2.898357 | -0.459191 | C            | 0.337445 | -2.866064 | -0.451549 |

|       |           |           |           |       |           |           |           |
|-------|-----------|-----------|-----------|-------|-----------|-----------|-----------|
| H     | 0.370230  | -3.982868 | -0.444177 | H     | 0.338136  | -3.950049 | -0.414961 |
| C     | -0.788975 | -2.217092 | -0.810560 | C     | -0.794042 | -2.180662 | -0.840691 |
| H     | -1.687598 | -2.749772 | -1.099349 | H     | -1.690947 | -2.709347 | -1.143443 |
| C     | -0.793575 | -0.806228 | -0.709821 | C     | -0.785910 | -0.784676 | -0.768175 |
| C     | 0.359358  | -0.079308 | -0.323626 | C     | 0.345748  | -0.062387 | -0.360122 |
| C     | -1.413464 | 1.442162  | -0.490755 | C     | -1.433602 | 1.463986  | -0.535545 |
| H     | 6.499814  | 1.460084  | 0.192176  | H     | 6.480426  | 1.445927  | 0.207757  |
| C     | -3.272793 | -0.297341 | -0.287284 | C     | -3.244626 | -0.289738 | -0.376438 |
| C     | -4.540023 | -0.811273 | 1.716996  | C     | -4.423362 | -0.848110 | 1.789273  |
| C     | -4.415678 | -0.551653 | -1.049349 | C     | -4.425189 | -0.549692 | -1.075234 |
| C     | -5.677185 | -1.063326 | 0.946452  | C     | -5.586717 | -1.099861 | 1.078104  |
| C     | -5.611961 | -0.932720 | -0.438457 | C     | -5.588948 | -0.945419 | -0.422021 |
| H     | -4.371442 | -0.451871 | -2.129350 | H     | -4.431215 | -0.440621 | -2.156076 |
| H     | -6.489141 | -1.126432 | -1.045927 | H     | -6.498210 | -1.146238 | -0.973697 |
| C     | -0.073937 | 1.327025  | -0.103657 | C     | -0.090041 | 1.337626  | -0.122086 |
| C     | 0.554949  | 2.425892  | 0.515723  | C     | 0.517705  | 2.422299  | 0.523957  |
| C     | -0.164486 | 3.653562  | 0.652074  | C     | -0.189079 | 3.614462  | 0.681530  |
| C     | -1.471459 | 3.773979  | 0.202355  | C     | -1.497400 | 3.745033  | 0.209245  |
| C     | -2.125253 | 2.667277  | -0.368255 | C     | -2.131667 | 2.655878  | -0.390417 |
| H     | 1.555788  | 2.351820  | 0.914224  | H     | 1.519765  | 2.348993  | 0.921770  |
| H     | 0.327279  | 4.498943  | 1.119589  | H     | 0.286206  | 4.449158  | 1.184729  |
| H     | -1.997758 | 4.715778  | 0.307954  | H     | -2.027655 | 4.682452  | 0.332889  |
| H     | -3.159386 | 2.733589  | -0.684477 | H     | -3.163673 | 2.729358  | -0.716600 |
| C     | -3.349054 | -0.432033 | 1.105162  | C     | -3.249920 | -0.450544 | 1.138197  |
| H     | -6.604558 | -1.359072 | 1.423894  | H     | -6.496556 | -1.405163 | 1.579065  |
| H     | -4.582801 | -0.910648 | 2.796002  | H     | -4.419664 | -0.958794 | 2.868969  |
| H     | -2.469641 | -0.238613 | 1.710369  | H     | -2.341994 | -0.247292 | 1.690757  |
| C     | -1.966294 | 0.115459  | -0.955762 | C     | -1.970593 | 0.134270  | -1.039800 |
| H     | -2.156894 | 0.160995  | -2.040814 | H     | -2.136446 | 0.184072  | -2.123831 |
| ***** |           |           |           | ***** |           |           |           |

|               |           |           |           |                   |           |           |           |
|---------------|-----------|-----------|-----------|-------------------|-----------|-----------|-----------|
| 1C234-t6-DMSO |           |           |           | 1C234-t7-n-hexane |           |           |           |
| C             | 5.494878  | 1.003043  | 0.125110  | C                 | 5.518638  | 1.007733  | 0.099163  |
| C             | 4.435769  | 1.735618  | -0.438792 | C                 | 4.465502  | 1.723621  | -0.506423 |
| H             | 4.609539  | 2.737971  | -0.813535 | H                 | 4.638352  | 2.716149  | -0.905087 |
| C             | 5.280842  | -0.302036 | 0.519074  | C                 | 5.303740  | -0.279051 | 0.539797  |
| H             | 6.101526  | -0.900520 | 0.900302  | H                 | 6.117425  | -0.858755 | 0.962364  |
| C             | 3.173617  | 1.179385  | -0.533702 | C                 | 3.184497  | 1.147489  | -0.598288 |
| H             | 2.388326  | 1.748583  | -1.008839 | H                 | 2.399903  | 1.700860  | -1.094222 |
| C             | 4.006931  | -0.902896 | 0.393718  | C                 | 4.022584  | -0.897598 | 0.409958  |
| C             | 2.900987  | -0.128229 | -0.070349 | C                 | 2.916057  | -0.126889 | -0.092260 |
| C             | 3.841051  | -2.306557 | 0.632028  | C                 | 3.862050  | -2.299344 | 0.665321  |
| H             | 4.690267  | -2.877637 | 0.991443  | H                 | 4.712051  | -2.858589 | 1.040985  |
| C             | 2.669763  | -2.922113 | 0.328257  | C                 | 2.696915  | -2.935270 | 0.354789  |
| H             | 2.571780  | -3.998052 | 0.424798  | H                 | 2.608069  | -4.010375 | 0.466676  |
| C             | 1.522925  | -2.176748 | -0.108007 | C                 | 1.543752  | -2.202575 | -0.105083 |
| C             | 1.583930  | -0.748322 | -0.168275 | C                 | 1.592395  | -0.753646 | -0.160266 |
| C             | 0.338692  | -2.866407 | -0.457194 | C                 | 0.358722  | -2.898317 | -0.457795 |
| H             | 0.340202  | -3.950430 | -0.422870 | H                 | 0.369881  | -3.982835 | -0.442323 |
| C             | -0.792878 | -2.180982 | -0.846407 | C                 | -0.789216 | -2.217162 | -0.809112 |
| H             | -1.688610 | -2.709954 | -1.152074 | H                 | -1.688136 | -2.749771 | -1.097102 |
| C             | -0.785934 | -0.784961 | -0.771465 | C                 | -0.793541 | -0.806301 | -0.708987 |
| C             | 0.345083  | -0.062328 | -0.361778 | C                 | 0.359531  | -0.079455 | -0.323285 |
| C             | -1.435048 | 1.463159  | -0.538044 | C                 | -1.413183 | 1.442210  | -0.490129 |
| H             | 6.479268  | 1.448012  | 0.214349  | H                 | 6.499810  | 1.459978  | 0.190612  |

|       |           |           |           |       |           |           |           |
|-------|-----------|-----------|-----------|-------|-----------|-----------|-----------|
| C     | -3.243539 | -0.291438 | -0.374535 | C     | -3.272936 | -0.297109 | -0.287551 |
| C     | -4.414831 | -0.849643 | 1.793339  | C     | -4.541231 | -0.810740 | 1.715965  |
| C     | -4.428865 | -0.550217 | -1.071312 | C     | -4.415377 | -0.551613 | -1.050122 |
| C     | -5.582826 | -1.100029 | 1.084238  | C     | -5.677907 | -1.062980 | 0.944895  |
| C     | -5.588982 | -0.944363 | -0.415752 | C     | -5.611953 | -0.932625 | -0.439903 |
| H     | -4.437278 | -0.439903 | -2.151934 | H     | -4.370525 | -0.452001 | -2.130144 |
| H     | -6.500474 | -1.143631 | -0.964372 | H     | -6.488793 | -1.126497 | -1.047820 |
| C     | -0.091686 | 1.337419  | -0.123341 | C     | -0.073610 | 1.326933  | -0.103356 |
| C     | 0.515187  | 2.422732  | 0.522791  | C     | 0.555492  | 2.425661  | 0.515899  |
| C     | -0.192064 | 3.614892  | 0.679280  | C     | -0.163854 | 3.653317  | 0.652546  |
| C     | -1.500086 | 3.744950  | 0.205433  | C     | -1.470913 | 3.773830  | 0.203286  |
| C     | -2.133502 | 2.655211  | -0.394413 | C     | -2.124910 | 2.667289  | -0.367219 |
| H     | 1.517197  | 2.350698  | 0.920917  | H     | 1.556385  | 2.351234  | 0.914212  |
| H     | 0.282768  | 4.450076  | 1.182030  | H     | 0.328039  | 4.498634  | 1.120049  |
| H     | -2.030365 | 4.682574  | 0.327298  | H     | -1.997155 | 4.715622  | 0.309260  |
| H     | -3.164718 | 2.728929  | -0.723021 | H     | -3.159295 | 2.733440  | -0.682660 |
| C     | -3.245143 | -0.453674 | 1.139975  | C     | -3.349991 | -0.431575 | 1.104818  |
| H     | -6.491225 | -1.404949 | 1.587923  | H     | -6.605526 | -1.358690 | 1.421884  |
| H     | -4.408690 | -0.961669 | 2.872913  | H     | -4.584623 | -0.909933 | 2.794966  |
| H     | -2.334993 | -0.253260 | 1.690175  | H     | -2.470827 | -0.237973 | 1.710304  |
| C     | -1.971649 | 0.133019  | -1.041614 | C     | -1.966072 | 0.115557  | -0.955239 |
| H     | -2.140245 | 0.182253  | -2.125092 | H     | -2.156118 | 0.161165  | -2.040471 |
| ***** |           |           |           | ***** |           |           |           |

| 12C34-t4 |           |           |           | 12C34-t4-CCI4 |           |           |           |
|----------|-----------|-----------|-----------|---------------|-----------|-----------|-----------|
| C        | 3.173934  | 2.853179  | 1.169160  | C             | 3.169328  | 2.856836  | 1.171379  |
| C        | 2.805608  | 4.110450  | 0.703906  | C             | 2.801025  | 4.113656  | 0.703855  |
| H        | 3.404712  | 4.980017  | 0.948991  | H             | 3.399280  | 4.983867  | 0.948715  |
| C        | 2.403147  | 1.716329  | 0.848895  | C             | 2.399379  | 1.719097  | 0.851364  |
| H        | 2.638250  | 0.767167  | 1.307237  | H             | 2.635107  | 0.770699  | 1.310983  |
| C        | 1.631796  | 4.262279  | -0.048070 | C             | 1.627743  | 4.264204  | -0.050331 |
| H        | 1.313017  | 5.245269  | -0.375409 | H             | 1.309038  | 5.246650  | -0.379255 |
| C        | 4.248322  | -1.913518 | -0.139575 | C             | 4.249871  | -1.910784 | -0.133957 |
| C        | 3.141734  | -1.061090 | -0.330893 | C             | 3.142777  | -1.059035 | -0.326782 |
| C        | 4.061404  | -3.253308 | 0.182515  | C             | 4.063383  | -3.251598 | 0.185603  |
| H        | 4.916439  | -3.902359 | 0.333401  | H             | 4.918622  | -3.900140 | 0.337458  |
| C        | 2.764134  | -3.778136 | 0.269658  | C             | 2.765936  | -3.778076 | 0.268899  |
| H        | 2.610659  | -4.831327 | 0.475185  | H             | 2.612907  | -4.831722 | 0.472222  |
| C        | 1.612334  | -2.939622 | 0.061451  | C             | 1.613884  | -2.939764 | 0.059483  |
| C        | 1.798781  | -1.547323 | -0.154248 | C             | 1.799432  | -1.546641 | -0.153763 |
| C        | 0.308577  | -3.507931 | 0.008368  | C             | 0.310683  | -3.509754 | 0.002758  |
| H        | 0.196599  | -4.572955 | 0.179252  | H             | 0.199453  | -4.575216 | 0.171054  |
| C        | -0.788329 | -2.734930 | -0.328396 | C             | -0.786512 | -2.736753 | -0.334756 |
| H        | -1.767340 | -3.186578 | -0.445012 | H             | -1.764293 | -3.189977 | -0.455335 |
| C        | -0.618883 | -1.359859 | -0.507595 | C             | -0.618247 | -1.360993 | -0.510980 |
| C        | 0.631792  | -0.733375 | -0.304383 | C             | 0.631658  | -0.733519 | -0.305037 |
| C        | -0.866772 | 0.950262  | -0.882653 | C             | -0.867695 | 0.949086  | -0.885288 |
| H        | 4.046040  | 2.741298  | 1.803323  | H             | 4.040613  | 2.746049  | 1.806855  |
| C        | -2.961500 | -0.338529 | -0.202956 | C             | -2.960274 | -0.340326 | -0.202025 |
| C        | -4.174782 | -0.127240 | 1.887288  | C             | -4.170042 | -0.127837 | 1.890939  |
| C        | -4.178214 | -0.523787 | -0.864205 | C             | -4.178117 | -0.526996 | -0.861391 |
| C        | -5.385412 | -0.312576 | 1.216731  | C             | -5.382027 | -0.314272 | 1.222364  |
| C        | -5.384029 | -0.511200 | -0.161122 | C             | -5.382841 | -0.514231 | -0.155822 |
| H        | -4.184198 | -0.680435 | -1.938425 | H             | -4.185945 | -0.684684 | -1.935292 |
| H        | -6.318524 | -0.657626 | -0.691516 | H             | -6.318166 | -0.661518 | -0.684479 |

|       |           |           |           |       |           |           |           |
|-------|-----------|-----------|-----------|-------|-----------|-----------|-----------|
| C     | 0.436972  | 0.712313  | -0.392242 | C     | 0.435645  | 0.712280  | -0.392777 |
| C     | 1.247741  | 1.825268  | -0.002094 | C     | 1.245068  | 1.826326  | -0.002028 |
| C     | 0.812258  | 3.124948  | -0.377920 | C     | 0.809319  | 3.125622  | -0.379879 |
| C     | -0.448510 | 3.305649  | -1.013476 | C     | -0.450563 | 3.305288  | -1.018263 |
| C     | -1.304179 | 2.236355  | -1.208620 | C     | -1.305244 | 2.234676  | -1.213807 |
| H     | -0.755452 | 4.309451  | -1.285873 | H     | -0.757574 | 4.308470  | -1.292734 |
| H     | -2.301391 | 2.393216  | -1.605200 | H     | -2.301202 | 2.390612  | -1.613859 |
| C     | -2.974752 | -0.140072 | 1.184007  | C     | -2.970981 | -0.140798 | 1.185086  |
| H     | -6.320056 | -0.302328 | 1.766047  | H     | -6.315757 | -0.303911 | 1.773227  |
| H     | -4.167555 | 0.027606  | 2.960578  | H     | -4.160851 | 0.027857  | 2.964076  |
| H     | -2.038589 | 0.004783  | 1.712449  | H     | -2.034420 | 0.004995  | 1.712689  |
| H     | 5.250000  | -1.519621 | -0.268831 | H     | 5.251464  | -1.515621 | -0.259906 |
| H     | 3.299670  | -0.053952 | -0.687183 | H     | 3.301492  | -0.051122 | -0.680519 |
| C     | -1.649407 | -0.347759 | -0.974021 | C     | -1.649673 | -0.349328 | -0.976247 |
| H     | -1.884885 | -0.562284 | -2.026071 | H     | -1.887268 | -0.563482 | -2.027492 |
| ***** |           |           |           | ***** |           |           |           |

| 12C34-t4-DCM |           |           |           | 12C34-t4-DMSO |           |           |           |
|--------------|-----------|-----------|-----------|---------------|-----------|-----------|-----------|
| C            | 3.153884  | 2.869063  | 1.177094  | C             | 3.143819  | 2.877179  | 1.180410  |
| C            | 2.782905  | 4.124345  | 0.706463  | C             | 2.770618  | 4.131420  | 0.708354  |
| H            | 3.377289  | 4.996901  | 0.952270  | H             | 3.362360  | 5.005556  | 0.954837  |
| C            | 2.388849  | 1.727998  | 0.855628  | C             | 2.382226  | 1.733878  | 0.857903  |
| H            | 2.627958  | 0.781047  | 1.316473  | H             | 2.623838  | 0.787749  | 1.319122  |
| C            | 1.611601  | 4.270072  | -0.052633 | C             | 1.600507  | 4.273867  | -0.053449 |
| H            | 1.290722  | 5.250864  | -0.384196 | H             | 1.277805  | 5.253552  | -0.386425 |
| C            | 4.254666  | -1.900611 | -0.122766 | C             | 4.257883  | -1.893490 | -0.116702 |
| C            | 3.145735  | -1.051439 | -0.318015 | C             | 3.147670  | -1.046124 | -0.313067 |
| C            | 4.070699  | -3.243512 | 0.191173  | C             | 4.075854  | -3.237595 | 0.193927  |
| H            | 4.927113  | -3.889980 | 0.344946  | H             | 4.933167  | -3.882606 | 0.348615  |
| C            | 2.774138  | -3.774381 | 0.266603  | C             | 2.780114  | -3.771289 | 0.265005  |
| H            | 2.623243  | -4.829136 | 0.465397  | H             | 2.630783  | -4.826731 | 0.461149  |
| C            | 1.620549  | -2.938167 | 0.054971  | C             | 1.625369  | -2.936715 | 0.052311  |
| C            | 1.802689  | -1.543315 | -0.153025 | C             | 1.805092  | -1.540868 | -0.152641 |
| C            | 0.319403  | -3.512797 | -0.009598 | C             | 0.325649  | -3.514347 | -0.016671 |
| H            | 0.211093  | -4.579346 | 0.153192  | H             | 0.219445  | -4.581556 | 0.142951  |
| C            | -0.779019 | -2.741646 | -0.348766 | C             | -0.773718 | -2.744736 | -0.356689 |
| H            | -1.754047 | -3.198497 | -0.477450 | H             | -1.747095 | -3.203789 | -0.489873 |
| C            | -0.614744 | -1.364334 | -0.518760 | C             | -0.612162 | -1.366525 | -0.523162 |
| C            | 0.632611  | -0.733202 | -0.307035 | C             | 0.633481  | -0.732861 | -0.308194 |
| C            | -0.870269 | 0.945022  | -0.891954 | C             | -0.871992 | 0.942271  | -0.895771 |
| H            | 4.023593  | 2.761870  | 1.815278  | H             | 4.012753  | 2.772351  | 1.819997  |
| C            | -2.956361 | -0.347630 | -0.200647 | C             | -2.953849 | -0.352835 | -0.199987 |
| C            | -4.156265 | -0.141033 | 1.899680  | C             | -4.147800 | -0.151920 | 1.904800  |
| C            | -4.177614 | -0.530292 | -0.855452 | C             | -4.177224 | -0.531150 | -0.852274 |
| C            | -5.371843 | -0.323412 | 1.235721  | C             | -5.365546 | -0.330024 | 1.243360  |
| C            | -5.379100 | -0.518394 | -0.143730 | C             | -5.376744 | -0.519965 | -0.136994 |
| H            | -4.190781 | -0.683887 | -1.929682 | H             | -4.193648 | -0.680677 | -1.926935 |
| H            | -6.316997 | -0.662536 | -0.668597 | H             | -6.316245 | -0.660809 | -0.659836 |
| C            | 0.432323  | 0.712416  | -0.394659 | C             | 0.430234  | 0.712549  | -0.395746 |
| C            | 1.237024  | 1.829906  | -0.002276 | C             | 1.231775  | 1.832296  | -0.002377 |
| C            | 0.798459  | 3.127604  | -0.383778 | C             | 0.791001  | 3.128879  | -0.385792 |
| C            | -0.459230 | 3.302874  | -1.028590 | C             | -0.465443 | 3.301103  | -1.034198 |
| C            | -1.309979 | 2.228863  | -1.225656 | C             | -1.313486 | 2.224944  | -1.232251 |
| H            | -0.767390 | 4.304436  | -1.307446 | H             | -0.774551 | 4.301669  | -1.315464 |
| H            | -2.303510 | 2.380963  | -1.633101 | H             | -2.305722 | 2.374396  | -1.643788 |

|       |           |           |           |       |           |           |           |
|-------|-----------|-----------|-----------|-------|-----------|-----------|-----------|
| C     | -2.960238 | -0.153164 | 1.187603  | C     | -2.953627 | -0.163395 | 1.189141  |
| H     | -6.303009 | -0.313957 | 1.790887  | H     | -6.295177 | -0.321308 | 1.801078  |
| H     | -4.141784 | 0.010419  | 2.973358  | H     | -4.130141 | -0.004618 | 2.979008  |
| H     | -2.021464 | -0.010973 | 1.712488  | H     | -2.013345 | -0.024926 | 1.712465  |
| H     | 5.255591  | -1.501694 | -0.241660 | H     | 5.258258  | -1.492131 | -0.231692 |
| H     | 3.304388  | -0.041364 | -0.665479 | H     | 3.305798  | -0.034729 | -0.656853 |
| C     | -1.649270 | -0.355109 | -0.981809 | C     | -1.648786 | -0.359130 | -0.985028 |
| H     | -1.891632 | -0.569485 | -2.031392 | H     | -1.893762 | -0.573888 | -2.033676 |
| ***** |           |           |           | ***** |           |           |           |

|                   |           |           |           |                   |             |             |             |
|-------------------|-----------|-----------|-----------|-------------------|-------------|-------------|-------------|
| 12C34-t4-n-hexane |           |           |           | P1234-t3          |             |             |             |
| C                 | 3.170833  | 2.855640  | 1.170755  | P1234-triplet-opt |             |             |             |
| C                 | 2.802689  | 4.112607  | 0.703700  | C                 | -2.46798300 | -3.82835000 | -1.00006800 |
| H                 | 3.401285  | 4.982596  | 0.948523  | C                 | -1.85471400 | -2.88993100 | -1.82559300 |
| C                 | 2.400479  | 1.718215  | 0.850807  | H                 | -1.39387500 | -3.19462600 | -2.75772200 |
| H                 | 2.635925  | 0.769635  | 1.310195  | C                 | -3.10222000 | -3.40736600 | 0.16386300  |
| C                 | 1.629222  | 4.263603  | -0.049913 | H                 | -3.62960600 | -4.12064300 | 0.78835100  |
| H                 | 1.310638  | 5.246214  | -0.378487 | C                 | -1.81351400 | -1.53289300 | -1.44239800 |
| C                 | 4.249386  | -1.911723 | -0.135342 | H                 | -1.32710100 | -0.82332100 | -2.09786800 |
| C                 | 3.142465  | -1.059736 | -0.327822 | C                 | -3.11907000 | -2.03532900 | 0.53633700  |
| C                 | 4.062701  | -3.252283 | 0.184867  | C                 | -2.36089100 | -1.09264600 | -0.24158300 |
| H                 | 4.917846  | -3.901012 | 0.336472  | C                 | -3.95536700 | -1.56651500 | 1.56927900  |
| C                 | 2.765226  | -3.778295 | 0.269120  | H                 | -4.53962300 | -2.27294500 | 2.14753600  |
| H                 | 2.612016  | -4.831819 | 0.472983  | C                 | -4.16212200 | -0.16128500 | 1.73978600  |
| C                 | 1.613297  | -2.939836 | 0.060000  | H                 | -4.92927200 | 0.18689100  | 2.42254900  |
| C                 | 1.799155  | -1.546922 | -0.153863 | C                 | -3.39344300 | 0.77054400  | 1.05178300  |
| C                 | 0.309905  | -3.509339 | 0.004209  | C                 | -2.30140700 | 0.31965400  | 0.20043500  |
| H                 | 0.198416  | -4.574682 | 0.173158  | C                 | -3.61691100 | 2.17737200  | 1.21102500  |
| C                 | -0.787184 | -2.736232 | -0.333102 | H                 | -4.46981200 | 2.50396100  | 1.79619300  |
| H                 | -1.765286 | -3.189038 | -0.452689 | C                 | -2.78537800 | 3.07954900  | 0.62252400  |
| C                 | -0.618535 | -1.360653 | -0.510075 | H                 | -2.98248400 | 4.14354500  | 0.70027400  |
| C                 | 0.631617  | -0.733520 | -0.304825 | C                 | -1.60548900 | 2.65529700  | -0.05885400 |
| C                 | -0.867427 | 0.949475  | -0.884549 | C                 | -1.30858100 | 1.25184000  | -0.16966500 |
| H                 | 4.042316  | 2.744500  | 1.805902  | C                 | -0.75147000 | 3.63663900  | -0.65334700 |
| C                 | -2.960663 | -0.339668 | -0.202224 | H                 | -1.07910600 | 4.67079500  | -0.61855400 |
| C                 | -4.171473 | -0.126989 | 1.889949  | C                 | 0.42593800  | 3.31665400  | -1.26068300 |
| C                 | -4.178158 | -0.526380 | -0.862107 | H                 | 1.04244900  | 4.07732100  | -1.72536800 |
| C                 | -5.383069 | -0.313511 | 1.220841  | C                 | 0.90295700  | 1.96135200  | -1.19374700 |
| C                 | -5.383216 | -0.513584 | -0.157227 | C                 | 0.06065900  | 0.92302100  | -0.60593300 |
| H                 | -4.185430 | -0.684169 | -1.936029 | C                 | 2.17415300  | 1.53264500  | -1.53206700 |
| H                 | -6.318279 | -0.660936 | -0.686336 | H                 | 2.93491900  | 2.16372400  | -1.97137600 |
| C                 | 0.436008  | 0.712274  | -0.392588 | H                 | -2.47575600 | -4.87732700 | -1.27383000 |
| C                 | 1.245883  | 1.825976  | -0.002014 | C                 | 0.75220300  | -0.26535300 | -0.41370600 |
| C                 | 0.810339  | 3.125413  | -0.379396 | P                 | 2.33545200  | -0.23787600 | -1.26807600 |
| C                 | -0.449785 | 3.305471  | -1.017040 | C                 | 3.65055400  | -0.45331600 | 0.02079500  |
| C                 | -1.304828 | 2.235230  | -1.212438 | C                 | 3.62471700  | 0.24013800  | 1.23865900  |
| H                 | -0.756713 | 4.308829  | -1.290990 | C                 | 4.70062000  | -1.33960700 | -0.23850600 |
| H                 | -2.301089 | 2.391512  | -1.611605 | C                 | 4.63431400  | 0.04763900  | 2.17655700  |
| C                 | -2.972105 | -0.139987 | 1.184800  | H                 | 2.81299000  | 0.92738300  | 1.44841600  |
| H                 | -6.317071 | -0.303108 | 1.771246  | C                 | 5.71394000  | -1.52982200 | 0.70251800  |
| H                 | -4.162850 | 0.028841  | 2.963073  | H                 | 4.72514800  | -1.88267000 | -1.17711500 |
| H                 | -2.035729 | 0.005887  | 1.712679  | C                 | 5.68127900  | -0.83729100 | 1.90966900  |
| H                 | 5.251026  | -1.516941 | -0.262138 | H                 | 4.60596500  | 0.58711300  | 3.11698400  |
| H                 | 3.301078  | -0.052052 | -0.682261 | H                 | 6.52380300  | -2.21921300 | 0.49116700  |
| C                 | -1.649662 | -0.348791 | -0.975626 | H                 | 6.46656100  | -0.98517800 | 2.64263600  |

|   |           |           |           |   |            |             |            |
|---|-----------|-----------|-----------|---|------------|-------------|------------|
| H | -1.886695 | -0.562987 | -2.027071 | H | 0.34638400 | -1.15251100 | 0.04638500 |
|   | *****     |           |           |   | *****      |             |            |

| P1234-CCl4-t3 |             |             |             | P1234-DCM-t3 |             |             |             |
|---------------|-------------|-------------|-------------|--------------|-------------|-------------|-------------|
| C             | -2.46654800 | -3.83062100 | -1.00143400 | C            | -2.46793000 | -3.83254800 | -1.00196900 |
| C             | -1.85331200 | -2.89167700 | -1.82691600 | C            | -1.85422100 | -2.89362900 | -1.82767400 |
| H             | -1.39197600 | -3.19615500 | -2.75887500 | H            | -1.39318100 | -3.19838700 | -2.75969400 |
| C             | -3.10168400 | -3.41006700 | 0.16270400  | C            | -3.10314600 | -3.41190900 | 0.16267900  |
| H             | -3.62895100 | -4.12356600 | 0.78694500  | H            | -3.63067200 | -4.12521900 | 0.78678300  |
| C             | -1.81287900 | -1.53426500 | -1.44353000 | C            | -1.81311200 | -1.53583500 | -1.44401200 |
| H             | -1.32616500 | -0.82490900 | -2.09910500 | H            | -1.32523900 | -0.82725000 | -2.09968200 |
| C             | -3.11945900 | -2.03762500 | 0.53490900  | C            | -3.12053200 | -2.03896400 | 0.53469100  |
| C             | -2.36154700 | -1.09428600 | -0.24296500 | C            | -2.36232600 | -1.09551100 | -0.24350500 |
| C             | -3.95698800 | -1.56968100 | 1.56772800  | C            | -3.95834600 | -1.57128800 | 1.56792000  |
| H             | -4.54092600 | -2.27667500 | 2.14551600  | H            | -4.54214700 | -2.27828000 | 2.14570800  |
| C             | -4.16614400 | -0.16443000 | 1.73772000  | C            | -4.16859800 | -0.16575200 | 1.73768300  |
| H             | -4.93474300 | 0.18254400  | 2.41935800  | H            | -4.93804000 | 0.18066300  | 2.41851000  |
| C             | -3.39757600 | 0.76803000  | 1.04994500  | C            | -3.39951600 | 0.76673100  | 1.04998700  |
| C             | -2.30389300 | 0.31811500  | 0.19956700  | C            | -2.30522100 | 0.31704800  | 0.19954200  |
| C             | -3.62345500 | 2.17500900  | 1.20822400  | C            | -3.62631300 | 2.17402500  | 1.20838300  |
| H             | -4.47765600 | 2.50078000  | 1.79188900  | H            | -4.48038800 | 2.49925300  | 1.79241600  |
| C             | -2.79218300 | 3.07839200  | 0.62045200  | C            | -2.79552500 | 3.07827400  | 0.62044000  |
| H             | -2.99109800 | 4.14203600  | 0.69720000  | H            | -2.99498100 | 4.14171300  | 0.69725100  |
| C             | -1.61014800 | 2.65502100  | -0.05874400 | C            | -1.61278100 | 2.65499900  | -0.05870500 |
| C             | -1.31157300 | 1.25178800  | -0.16921400 | C            | -1.31337300 | 1.25181900  | -0.16915500 |
| C             | -0.75594800 | 3.63808600  | -0.65115800 | C            | -0.75897300 | 3.63938600  | -0.65066400 |
| H             | -1.08428000 | 4.67194700  | -0.61571400 | H            | -1.08784600 | 4.67293800  | -0.61452000 |
| C             | 0.42299000  | 3.31948800  | -1.25701400 | C            | 0.42064200  | 3.32166600  | -1.25638600 |
| H             | 1.03974600  | 4.08102500  | -1.71993400 | H            | 1.03724800  | 4.08371300  | -1.71857900 |
| C             | 0.90069800  | 1.96414500  | -1.19004700 | C            | 0.89886400  | 1.96624600  | -1.18897600 |
| C             | 0.05888400  | 0.92468200  | -0.60307200 | C            | 0.05782700  | 0.92601300  | -0.60173600 |
| C             | 2.17294600  | 1.53718800  | -1.52741800 | C            | 2.17197500  | 1.54077600  | -1.52589700 |
| H             | 2.93400200  | 2.16922200  | -1.96495300 | H            | 2.93272600  | 2.17355100  | -1.96301600 |
| H             | -2.47369300 | -4.87958800 | -1.27521400 | H            | -2.47551300 | -4.88148300 | -1.27575200 |
| C             | 0.75134300  | -0.26291600 | -0.40924000 | C            | 0.75120800  | -0.26074500 | -0.40633600 |
| P             | 2.33534900  | -0.23300500 | -1.26175800 | P            | 2.33583500  | -0.22875700 | -1.25773500 |
| C             | 3.65383400  | -0.45203000 | 0.02214900  | C            | 3.65708300  | -0.45081700 | 0.02194900  |
| C             | 3.62392000  | 0.22792400  | 1.24784800  | C            | 3.63174600  | 0.23030100  | 1.24748900  |
| C             | 4.71131700  | -1.32640100 | -0.24911700 | C            | 4.71176300  | -1.32837000 | -0.25168900 |
| C             | 4.63731400  | 0.03421600  | 2.18194800  | C            | 4.64701800  | 0.03454200  | 2.17968900  |
| H             | 2.80695600  | 0.90571200  | 1.46788500  | H            | 2.81782100  | 0.91096500  | 1.47005400  |
| C             | 5.72853200  | -1.51740000 | 0.68796200  | C            | 5.73072000  | -1.52148900 | 0.68356900  |
| H             | 4.73968400  | -1.85963700 | -1.19318000 | H            | 4.73790900  | -1.86231000 | -1.19533300 |
| C             | 5.69201400  | -0.83827500 | 1.90308300  | C            | 5.69883600  | -0.84135100 | 1.89875100  |
| H             | 4.60581800  | 0.56298100  | 3.12825700  | H            | 4.61926400  | 0.56426200  | 3.12547600  |
| H             | 6.54403700  | -2.19708100 | 0.46739900  | H            | 6.54390600  | -2.20326700 | 0.46139400  |
| H             | 6.48005600  | -0.98707500 | 2.63281300  | H            | 6.48818900  | -0.99169200 | 2.62660900  |
| H             | 0.34622900  | -1.15094400 | 0.04985600  | H            | 0.34681500  | -1.14954700 | 0.05200000  |
|               | *****       |             |             |              | *****       |             |             |

| P1234-DMSO-t3 |             |             |             | P1234-n-hexane-t3 |             |             |             |
|---------------|-------------|-------------|-------------|-------------------|-------------|-------------|-------------|
| C             | -2.46998000 | -3.83311200 | -1.00149000 | C                 | -2.46660500 | -3.83024200 | -1.00120500 |
| C             | -1.85562800 | -2.89459000 | -1.82736100 | C                 | -1.85337700 | -2.89136900 | -1.82667100 |
| H             | -1.39484700 | -3.19978500 | -2.75936700 | H                 | -1.39204900 | -3.19586400 | -2.75862800 |

|       |             |             |             |       |             |             |             |
|-------|-------------|-------------|-------------|-------|-------------|-------------|-------------|
| C     | -3.10504800 | -3.41203700 | 0.16331300  | C     | -3.10166400 | -3.40963000 | 0.16285000  |
| H     | -3.63303700 | -4.12498600 | 0.78737800  | H     | -3.62894300 | -4.12310900 | 0.78712400  |
| C     | -1.81361600 | -1.53661200 | -1.44370600 | C     | -1.81291500 | -1.53402000 | -1.44334300 |
| H     | -1.32480800 | -0.82866800 | -2.09942500 | H     | -1.32629700 | -0.82459600 | -2.09889600 |
| C     | -3.12164300 | -2.03883300 | 0.53516100  | C     | -3.11937000 | -2.03726500 | 0.53508300  |
| C     | -2.36286000 | -1.09572600 | -0.24327400 | C     | -2.36142500 | -1.09401800 | -0.24276500 |
| C     | -3.95924200 | -1.57082400 | 1.56861200  | C     | -3.95675900 | -1.56919100 | 1.56786300  |
| H     | -4.54323800 | -2.27747000 | 2.14656000  | H     | -4.54075900 | -2.27611200 | 2.14569900  |
| C     | -4.16917300 | -0.16503300 | 1.73831100  | C     | -4.16555900 | -0.16395800 | 1.73791800  |
| H     | -4.93871100 | 0.18161800  | 2.41884600  | H     | -4.93394600 | 0.18320500  | 2.41972100  |
| C     | -3.39943600 | 0.76704400  | 1.05061600  | C     | -3.39699000 | 0.76841700  | 1.05012700  |
| C     | -2.30532400 | 0.31694700  | 0.19984900  | C     | -2.30352700 | 0.31836500  | 0.19966200  |
| C     | -3.62579200 | 2.17454800  | 1.20941900  | C     | -3.62251900 | 2.17535700  | 1.20850900  |
| H     | -4.47923200 | 2.49980000  | 1.79430200  | H     | -4.47657900 | 2.50126100  | 1.79232200  |
| C     | -2.79515500 | 3.07884800  | 0.62102900  | C     | -2.79117500 | 3.07853600  | 0.62067300  |
| H     | -2.99418700 | 4.14230300  | 0.69822800  | H     | -2.98983600 | 4.14223700  | 0.69753500  |
| C     | -1.61276000 | 2.65510900  | -0.05889400 | C     | -1.60943500 | 2.65505100  | -0.05877100 |
| C     | -1.31351500 | 1.25184500  | -0.16933500 | C     | -1.31111100 | 1.25178800  | -0.16927200 |
| C     | -0.75921300 | 3.63968700  | -0.65139100 | C     | -0.75522400 | 3.63782300  | -0.65145400 |
| H     | -1.08812400 | 4.67315200  | -0.61507600 | H     | -1.08344200 | 4.67173800  | -0.61614300 |
| C     | 0.42028400  | 3.32193100  | -1.25755700 | C     | 0.42349300  | 3.31900200  | -1.25747800 |
| H     | 1.03676700  | 4.08391800  | -1.71995100 | H     | 1.04023500  | 4.08040100  | -1.72065300 |
| C     | 0.89848200  | 1.96643400  | -1.18972800 | C     | 0.90108500  | 1.96367200  | -1.19053700 |
| C     | 0.05776300  | 0.92619600  | -0.60182300 | C     | 0.05916000  | 0.92439500  | -0.60348100 |
| C     | 2.17178500  | 1.54127800  | -1.52664600 | C     | 2.17315300  | 1.53641000  | -1.52804000 |
| H     | 2.93230500  | 2.17413500  | -1.96409700 | H     | 2.93419900  | 2.16828100  | -1.96580600 |
| H     | -2.47822600 | -4.88205500 | -1.27516500 | H     | -2.47378100 | -4.87921600 | -1.27496800 |
| C     | 0.75140900  | -0.26024800 | -0.40569400 | C     | 0.75145200  | -0.26334700 | -0.40993000 |
| P     | 2.33620800  | -0.22784300 | -1.25699500 | P     | 2.33532500  | -0.23386300 | -1.26274500 |
| C     | 3.65833200  | -0.45059300 | 0.02135800  | C     | 3.65324100  | -0.45225800 | 0.02201500  |
| C     | 3.63821100  | 0.23688300  | 1.24359700  | C     | 3.62347100  | 0.22915500  | 1.24684100  |
| C     | 4.70799800  | -1.33520800 | -0.24940500 | C     | 4.71008900  | -1.32775900 | -0.24774000 |
| C     | 4.65359000  | 0.04026200  | 2.17570700  | C     | 4.63631100  | 0.03573200  | 2.18149600  |
| H     | 2.82867100  | 0.92347200  | 1.46403900  | H     | 2.80688500  | 0.90782500  | 1.46553800  |
| C     | 5.72693100  | -1.52938000 | 0.68587300  | C     | 5.72675100  | -1.51851400 | 0.68990300  |
| H     | 4.73081300  | -1.87370000 | -1.19050300 | H     | 4.73817000  | -1.86206800 | -1.19121900 |
| C     | 5.70021700  | -0.84304100 | 1.89787100  | C     | 5.69034500  | -0.83793300 | 1.90412000  |
| H     | 4.63003000  | 0.57506100  | 3.11870100  | H     | 4.60491200  | 0.56565300  | 3.12717800  |
| H     | 6.53617500  | -2.21652300 | 0.46605800  | H     | 6.54178800  | -2.19914800 | 0.47048500  |
| H     | 6.48962900  | -0.99400700 | 2.62546800  | H     | 6.47799100  | -0.98651500 | 2.63434100  |
| H     | 0.34720400  | -1.14926800 | 0.05245200  | H     | 0.34620200  | -1.15122500 | 0.04932200  |
| ***** |             |             |             | ***** |             |             |             |

|          |            |             |             |               |            |             |             |
|----------|------------|-------------|-------------|---------------|------------|-------------|-------------|
| 1P234-t7 |            |             |             | 1P234-CC14-t7 |            |             |             |
| C        | 5.64026900 | 0.94035000  | -0.26669400 | C             | 5.64156000 | 0.94050400  | -0.26871700 |
| C        | 4.51786400 | 1.64774200  | -0.76322400 | C             | 4.51858300 | 1.64811200  | -0.76478700 |
| H        | 4.65609400 | 2.62686700  | -1.20817800 | H             | 4.65677900 | 2.62715000  | -1.20988700 |
| C        | 5.47763200 | -0.32775000 | 0.23805500  | C             | 5.47926400 | -0.32772700 | 0.23686100  |
| H        | 6.33520900 | -0.89397500 | 0.58674000  | H             | 6.33707100 | -0.89382500 | 0.58504800  |
| C        | 3.25927300 | 1.10255700  | -0.69908900 | C             | 3.25969500 | 1.10307300  | -0.69916100 |
| H        | 2.42090000 | 1.65067700  | -1.10546400 | H             | 2.42131000 | 1.65176500  | -1.10483100 |
| C        | 4.19967100 | -0.93974200 | 0.28697400  | C             | 4.20077500 | -0.93953200 | 0.28683600  |
| C        | 3.03849300 | -0.19402100 | -0.14167200 | C             | 3.03915700 | -0.19358800 | -0.14123900 |
| C        | 4.04022400 | -2.27837300 | 0.71230200  | C             | 4.04191000 | -2.27854400 | 0.71251400  |
| H        | 4.91011700 | -2.82866100 | 1.05495700  | H             | 4.91180300 | -2.82891100 | 1.05480200  |

|       |             |             |             |       |             |             |             |
|-------|-------------|-------------|-------------|-------|-------------|-------------|-------------|
| C     | 2.81051900  | -2.89197000 | 0.64737900  | C     | 2.81201100  | -2.89248900 | 0.64782200  |
| H     | 2.70810400  | -3.93704300 | 0.92014700  | H     | 2.70973900  | -3.93759400 | 0.92020700  |
| C     | 1.65473600  | -2.18328600 | 0.22677000  | C     | 1.65590500  | -2.18350400 | 0.22738000  |
| C     | 1.75047000  | -0.79659700 | -0.05332000 | C     | 1.75105000  | -0.79639300 | -0.05215300 |
| C     | 0.41692600  | -2.87753100 | 0.01157700  | C     | 0.41868300  | -2.87887800 | 0.01151200  |
| H     | 0.38193900  | -3.94360300 | 0.20504700  | H     | 0.38442400  | -3.94507500 | 0.20384200  |
| C     | -0.70598900 | -2.22979100 | -0.58368700 | C     | -0.70452300 | -2.23115800 | -0.58400400 |
| H     | -1.57601200 | -2.81805300 | -0.85492600 | H     | -1.57338700 | -2.82054400 | -0.85642100 |
| C     | -0.68239900 | -0.87984600 | -0.77158800 | C     | -0.68159400 | -0.88077200 | -0.77041000 |
| C     | 0.47686000  | -0.09227500 | -0.27841400 | C     | 0.47704600  | -0.09239900 | -0.27670400 |
| C     | -1.22597100 | 1.58160200  | -0.39178600 | C     | -1.22559500 | 1.58213200  | -0.39124400 |
| H     | 6.62526900  | 1.39080100  | -0.30985500 | H     | 6.62649100  | 1.39094500  | -0.31294800 |
| C     | -3.48774000 | -0.25329100 | -0.39886700 | C     | -3.48959800 | -0.25357200 | -0.39896500 |
| C     | -4.62600000 | -0.77119300 | 1.67810100  | C     | -4.62984300 | -0.77176700 | 1.67737400  |
| C     | -4.68402900 | -0.47675500 | -1.08958000 | C     | -4.68542800 | -0.47619900 | -1.09121100 |
| C     | -5.81436800 | -0.99480100 | 0.97906500  | C     | -5.81798000 | -0.99461900 | 0.97695900  |
| C     | -5.84249100 | -0.84828100 | -0.40495100 | C     | -5.84486200 | -0.84751900 | -0.40742800 |
| H     | -4.70836500 | -0.35869800 | -2.16798800 | H     | -4.70999200 | -0.35832600 | -2.16958600 |
| H     | -6.76225300 | -1.02029500 | -0.95302800 | H     | -6.76409100 | -1.01889700 | -0.95646700 |
| P     | -2.00044000 | 0.23782700  | -1.39724800 | P     | -2.00064000 | 0.23681600  | -1.39393900 |
| C     | 0.08630100  | 1.21493500  | 0.08808600  | C     | 0.08630000  | 1.21501700  | 0.08947600  |
| C     | 0.79036900  | 2.15758300  | 0.89960000  | C     | 0.79005000  | 2.15782900  | 0.90118600  |
| C     | 0.23640300  | 3.39658900  | 1.16021600  | C     | 0.23665000  | 3.39773700  | 1.16055900  |
| C     | -1.02025100 | 3.75377600  | 0.64050600  | C     | -1.01941800 | 3.75550800  | 0.63910200  |
| C     | -1.74887000 | 2.83341200  | -0.13247800 | C     | -1.74825900 | 2.83468500  | -0.13382100 |
| H     | 1.74343000  | 1.88709300  | 1.33409400  | H     | 1.74244400  | 1.88752800  | 1.33731400  |
| H     | 0.77516300  | 4.10087400  | 1.78459400  | H     | 0.77519400  | 4.10210800  | 1.78494500  |
| H     | -1.43203900 | 4.73546200  | 0.84367500  | H     | -1.43074200 | 4.73760100  | 0.84097000  |
| H     | -2.72587400 | 3.10947900  | -0.51531900 | H     | -2.72460100 | 3.11153200  | -0.51768700 |
| C     | -3.47082400 | -0.40468700 | 0.99469900  | C     | -3.47367800 | -0.40540900 | 0.99483900  |
| H     | -6.71298100 | -1.28105400 | 1.51427800  | H     | -6.71713400 | -1.28072000 | 1.51123300  |
| H     | -4.60196700 | -0.88315500 | 2.75665100  | H     | -4.60660300 | -0.88422300 | 2.75581800  |
| H     | -2.55259000 | -0.23425400 | 1.54541000  | H     | -2.55626700 | -0.23594000 | 1.54726500  |
| ***** |             |             |             | ***** |             |             |             |

| IP234-DCM-t7 |             |             |             | IP234-DMSO-t7 |             |             |             |
|--------------|-------------|-------------|-------------|---------------|-------------|-------------|-------------|
| C            | 5.62500800  | 0.98511800  | -0.00089700 | C             | 5.62590600  | 0.98685600  | -0.00108700 |
| C            | 4.57033600  | 1.67369000  | -0.57089600 | C             | 4.57082100  | 1.67595000  | -0.56988600 |
| H            | 4.72008400  | 2.66774300  | -0.97680100 | H             | 4.72012400  | 2.67061300  | -0.97443800 |
| C            | 5.41382200  | -0.32013600 | 0.47794400  | C             | 5.41509500  | -0.31906900 | 0.47675700  |
| H            | 6.23689600  | -0.89212300 | 0.89149300  | H             | 6.23839100  | -0.89126400 | 0.88944000  |
| C            | 3.27134400  | 1.09468300  | -0.62989500 | C             | 3.27177000  | 1.09665900  | -0.62895900 |
| H            | 2.47969200  | 1.65084100  | -1.11052300 | H             | 2.47987800  | 1.65370400  | -1.10818500 |
| C            | 4.12652900  | -0.93346700 | 0.40452700  | C             | 4.12767000  | -0.93236200 | 0.40366600  |
| C            | 3.00523200  | -0.18251400 | -0.09476000 | C             | 3.00592200  | -0.18123100 | -0.09484000 |
| C            | 3.95694800  | -2.28933500 | 0.74822400  | C             | 3.95856600  | -2.28848300 | 0.74730100  |
| H            | 4.80714500  | -2.85057900 | 1.11990900  | H             | 4.80875700  | -2.84963000 | 1.11897600  |
| C            | 2.73878800  | -2.94597300 | 0.50793900  | C             | 2.74063800  | -2.94551700 | 0.50682200  |
| H            | 2.66280000  | -4.01743600 | 0.65442900  | H             | 2.66535200  | -4.01700700 | 0.65309300  |
| C            | 1.62299200  | -2.23435100 | 0.04687000  | C             | 1.62461900  | -2.23407100 | 0.04583900  |
| C            | 1.70009000  | -0.80478700 | -0.10531200 | C             | 1.70100300  | -0.80403900 | -0.10547700 |
| C            | 0.43185700  | -2.94351000 | -0.32265000 | C             | 0.43413300  | -2.94386900 | -0.32484200 |
| H            | 0.42375600  | -4.02317800 | -0.22347200 | H             | 0.42661200  | -4.02358000 | -0.22663400 |
| C            | -0.65498100 | -2.27568100 | -0.84343900 | C             | -0.65308900 | -2.27623900 | -0.84555000 |
| H            | -1.52183600 | -2.82344500 | -1.19442800 | H             | -1.51899500 | -2.82459600 | -1.19788800 |

|       |             |             |             |       |             |             |             |
|-------|-------------|-------------|-------------|-------|-------------|-------------|-------------|
| C     | -0.66062300 | -0.86959800 | -0.82852200 | C     | -0.65981800 | -0.87000500 | -0.82877500 |
| C     | 0.44040900  | -0.11450400 | -0.34176700 | C     | 0.44064600  | -0.11437300 | -0.34149100 |
| C     | -1.23899800 | 1.60378400  | -0.50984000 | C     | -1.23988500 | 1.60320900  | -0.50840300 |
| H     | 6.60983000  | 1.43311900  | 0.06054400  | H     | 6.61067900  | 1.43489200  | 0.06054800  |
| C     | -3.45762000 | -0.26873700 | -0.31022600 | C     | -3.45840500 | -0.27036300 | -0.31047800 |
| C     | -4.45585000 | -0.78800100 | 1.83688300  | C     | -4.45549700 | -0.79975000 | 1.83496800  |
| C     | -4.70097900 | -0.46905800 | -0.92089600 | C     | -4.70387700 | -0.45964500 | -0.92046000 |
| C     | -5.69392300 | -0.98511300 | 1.21944600  | C     | -5.69584600 | -0.98546100 | 1.21830000  |
| C     | -5.81565300 | -0.82547900 | -0.15880600 | C     | -5.81917800 | -0.81522900 | -0.15870500 |
| H     | -4.79952000 | -0.34627400 | -1.99413200 | H     | -4.80399700 | -0.32912700 | -1.99257500 |
| H     | -6.77368100 | -0.97739800 | -0.64314400 | H     | -6.77883100 | -0.95849700 | -0.64234700 |
| P     | -2.02747100 | 0.20312700  | -1.39125800 | P     | -2.02771300 | 0.20216200  | -1.38997800 |
| C     | 0.06392200  | 1.25223800  | -0.03583300 | C     | 0.06328700  | 1.25207000  | -0.03464300 |
| C     | 0.76113400  | 2.20389200  | 0.75299500  | C     | 0.76010800  | 2.20393700  | 0.75434100  |
| C     | 0.20715000  | 3.45555700  | 0.98565000  | C     | 0.20556900  | 3.45547800  | 0.98752700  |
| C     | -1.04167000 | 3.80620700  | 0.45246800  | C     | -1.04351600 | 3.80571900  | 0.45453800  |
| C     | -1.76844300 | 2.86592700  | -0.29595100 | C     | -1.77000200 | 2.86518000  | -0.29419500 |
| H     | 1.71379600  | 1.95113500  | 1.19657700  | H     | 1.71314300  | 1.95199800  | 1.19758800  |
| H     | 0.74737300  | 4.16988500  | 1.59718200  | H     | 0.74564000  | 4.16996200  | 1.59896200  |
| H     | -1.45501300 | 4.79128700  | 0.63464400  | H     | -1.45724100 | 4.79058400  | 0.63685000  |
| H     | -2.74927000 | 3.12415800  | -0.68091600 | H     | -2.75080500 | 3.12337300  | -0.67922800 |
| C     | -3.34442000 | -0.43244700 | 1.07812000  | C     | -3.34340500 | -0.44481900 | 1.07655700  |
| H     | -6.55778400 | -1.26216900 | 1.81313900  | H     | -6.56008900 | -1.26214900 | 1.81151800  |
| H     | -4.35837700 | -0.91198400 | 2.90973000  | H     | -4.35678500 | -0.93232500 | 2.90664200  |
| H     | -2.38823900 | -0.28091000 | 1.56639100  | H     | -2.38554700 | -0.30257400 | 1.56440800  |
| ***** |             |             |             | ***** |             |             |             |

| 1P234-n-hexane-t7 |             |             |             | 12P34-t5 |             |             |             |
|-------------------|-------------|-------------|-------------|----------|-------------|-------------|-------------|
| C                 | 5.64129900  | 0.94036400  | -0.26839600 | C        | 3.00506900  | 2.81549800  | 1.38286400  |
| C                 | 4.51842900  | 1.64794400  | -0.76455800 | C        | 2.66452500  | 4.09866800  | 0.91769100  |
| H                 | 4.65664200  | 2.62697300  | -1.20968300 | H        | 3.22295800  | 4.96623300  | 1.24877200  |
| C                 | 5.47892700  | -0.32783300 | 0.23703900  | C        | 2.30906000  | 1.70138200  | 0.95191800  |
| H                 | 6.33669100  | -0.89397200 | 0.58530500  | H        | 2.56111400  | 0.73254700  | 1.35764100  |
| C                 | 3.25959700  | 1.10290300  | -0.69917800 | C        | 1.57011300  | 4.25203200  | 0.06852800  |
| H                 | 2.42121500  | 1.65146900  | -1.10500500 | H        | 1.26136000  | 5.24185300  | -0.25022300 |
| C                 | 4.20053300  | -0.93966100 | 0.28683200  | C        | 4.44626200  | -1.52518500 | -0.19051700 |
| C                 | 3.03900200  | -0.19373900 | -0.14132800 | C        | 3.27908600  | -0.82737000 | -0.41872600 |
| C                 | 4.04153500  | -2.27859800 | 0.71242700  | C        | 4.40738800  | -2.85585400 | 0.29462000  |
| H                 | 4.91141200  | -2.82901000 | 1.05473600  | H        | 5.32564900  | -3.39595400 | 0.48903100  |
| C                 | 2.81165000  | -2.89243900 | 0.64773000  | C        | 3.16867200  | -3.49120600 | 0.44884900  |
| H                 | 2.70933000  | -3.93754100 | 0.92017000  | H        | 3.12842700  | -4.53485400 | 0.74394000  |
| C                 | 1.65560400  | -2.18347800 | 0.22731100  | C        | 1.96116600  | -2.81832400 | 0.18088200  |
| C                 | 1.75090100  | -0.79645000 | -0.05233700 | C        | 1.99386000  | -1.40937500 | -0.16241200 |
| C                 | 0.41824300  | -2.87857000 | 0.01163300  | C        | 0.73034200  | -3.51389000 | 0.16656800  |
| H                 | 0.38378200  | -3.94473900 | 0.20419600  | H        | 0.72523500  | -4.56619500 | 0.43249000  |
| C                 | -0.70488500 | -2.23082600 | -0.58386900 | C        | -0.44714800 | -2.89777900 | -0.25320600 |
| H                 | -1.57398100 | -2.81999200 | -0.85603800 | H        | -1.36238800 | -3.46901600 | -0.34805400 |
| C                 | -0.68179300 | -0.88052800 | -0.77056900 | C        | -0.43111800 | -1.52069100 | -0.55223900 |
| C                 | 0.47699100  | -0.09236700 | -0.27695900 | C        | 0.74534000  | -0.73775200 | -0.36599900 |
| C                 | -1.22561400 | 1.58211700  | -0.39129800 | C        | -0.79510800 | 0.94613300  | -1.06736500 |
| H                 | 6.62625000  | 1.39079200  | -0.31245200 | H        | 3.81195900  | 2.69694600  | 2.09712200  |
| C                 | -3.48925300 | -0.25344300 | -0.39893900 | C        | -3.14010200 | -0.43688300 | -0.16339300 |
| C                 | -4.62918000 | -0.77156800 | 1.67746500  | C        | -4.02304600 | -0.18939000 | 2.08088100  |
| C                 | -4.68512100 | -0.47640200 | -1.09095500 | C        | -4.44825200 | -0.56612300 | -0.64702700 |
| C                 | -5.81729400 | -0.99473500 | 0.97727100  | C        | -5.32511300 | -0.30553300 | 1.58836900  |

|       |             |             |             |       |             |             |             |
|-------|-------------|-------------|-------------|-------|-------------|-------------|-------------|
| C     | -5.84435700 | -0.84782800 | -0.40704900 | C     | -5.53593500 | -0.49306400 | 0.22294900  |
| H     | -4.70957000 | -0.35853500 | -2.16934300 | H     | -4.61414400 | -0.72462100 | -1.70758800 |
| H     | -6.76365300 | -1.01946200 | -0.95592400 | H     | -6.54433500 | -0.58632400 | -0.16489900 |
| P     | -2.00059400 | 0.23710800  | -1.39453900 | P     | -1.74447200 | -0.58361400 | -1.37797300 |
| C     | 0.08633000  | 1.21503400  | 0.08925500  | C     | 0.46396500  | 0.69466600  | -0.46998400 |
| C     | 0.79019700  | 2.15776200  | 0.90093000  | C     | 1.23255200  | 1.81023900  | 0.01319300  |
| C     | 0.23676600  | 3.39754300  | 1.16051600  | C     | 0.81347400  | 3.13498600  | -0.36147400 |
| C     | -1.01938200 | 3.75526800  | 0.63936800  | C     | -0.38442200 | 3.31605000  | -1.09771000 |
| C     | -1.74824600 | 2.83456200  | -0.13355000 | C     | -1.20584600 | 2.24250900  | -1.40314700 |
| H     | 1.74268900  | 1.88735000  | 1.33676600  | H     | -0.67677500 | 4.32322800  | -1.37563900 |
| H     | 0.77539200  | 4.10186000  | 1.78491000  | H     | -2.15694900 | 2.40386100  | -1.89732100 |
| H     | -1.43074200 | 4.73731500  | 0.84144600  | C     | -2.93722700 | -0.25456700 | 1.21357900  |
| H     | -2.72470500 | 3.11130700  | -0.51721200 | H     | -6.16897500 | -0.25497300 | 2.26727300  |
| C     | -3.47320600 | -0.40509600 | 0.99481200  | H     | -3.85572300 | -0.04672900 | 3.14297700  |
| H     | -6.71634600 | -1.28093800 | 1.51168500  | H     | -1.92955000 | -0.16052000 | 1.60309300  |
| H     | -4.60582900 | -0.88384000 | 2.75594200  | H     | 5.40051200  | -1.05619200 | -0.40114800 |
| H     | -2.55570300 | -0.23527700 | 1.54696200  | H     | 3.33336300  | 0.16985800  | -0.83400900 |
| ***** |             |             |             | ***** |             |             |             |

| 12P34-CCL4-t5 |             |             |             | 12P34-DCM-t5 |             |             |             |
|---------------|-------------|-------------|-------------|--------------|-------------|-------------|-------------|
| C             | 2.71948000  | 2.85679100  | 1.62914300  | C            | 3.09286100  | 2.77741100  | 1.49769900  |
| C             | 2.50278300  | 4.10803300  | 1.05405200  | C            | 2.81471600  | 4.06938100  | 1.02672300  |
| H             | 3.03343700  | 4.97916600  | 1.42102300  | H            | 3.40334100  | 4.91314300  | 1.36866500  |
| C             | 2.05163800  | 1.73331500  | 1.13426800  | C            | 2.35783600  | 1.68422000  | 1.03951700  |
| H             | 2.22876100  | 0.77241700  | 1.59877500  | H            | 2.58467400  | 0.70278000  | 1.43026100  |
| C             | 1.57605300  | 4.23833800  | 0.02393700  | C            | 1.76196500  | 4.26398500  | 0.15024900  |
| H             | 1.36806700  | 5.21558900  | -0.39892200 | H            | 1.50255800  | 5.26360700  | -0.18168800 |
| C             | 4.39339400  | -1.53195600 | 0.03974200  | C            | 4.43312700  | -1.67820700 | -0.20400800 |
| C             | 3.23038700  | -0.81547400 | -0.23862400 | C            | 3.27714000  | -0.91367800 | -0.37477500 |
| C             | 4.31915900  | -2.88113900 | 0.39248100  | C            | 4.34375100  | -3.02901000 | 0.15902300  |
| H             | 5.22008800  | -3.43609700 | 0.62804200  | H            | 5.24371000  | -3.61369700 | 0.31260200  |
| C             | 3.08467700  | -3.51654600 | 0.40662900  | C            | 3.09823100  | -3.62139700 | 0.28494200  |
| H             | 3.02059700  | -4.57576800 | 0.63252400  | H            | 3.01479800  | -4.67783000 | 0.51675500  |
| C             | 1.90015700  | -2.81910000 | 0.09259800  | C            | 1.89966200  | -2.87921700 | 0.07368400  |
| C             | 1.96361400  | -1.41364500 | -0.17076400 | C            | 1.98914100  | -1.46126900 | -0.18787800 |
| C             | 0.66195500  | -3.52398500 | -0.06103400 | C            | 0.64698300  | -3.53912900 | 0.04268400  |
| H             | 0.63760600  | -4.58772600 | 0.14687700  | H            | 0.60473300  | -4.60507700 | 0.23376800  |
| C             | -0.46620800 | -2.88034200 | -0.57848000 | C            | -0.50008100 | -2.84602300 | -0.34319300 |
| H             | -1.35896200 | -3.45900500 | -0.79173400 | H            | -1.43220100 | -3.37872600 | -0.49579500 |
| C             | -0.45589200 | -1.51661900 | -0.80194500 | C            | -0.43903500 | -1.46131000 | -0.52874600 |
| C             | 0.71012400  | -0.70076600 | -0.45462400 | C            | 0.75948600  | -0.70861800 | -0.33199800 |
| C             | -0.81288200 | 0.96463400  | -1.22354700 | C            | -0.72065100 | 1.05587100  | -1.00644700 |
| H             | 3.40737200  | 2.74801800  | 2.45976700  | H            | 3.88646200  | 2.62209900  | 2.21988600  |
| C             | -3.06375100 | -0.46341300 | -0.11024000 | C            | -3.22221500 | -0.42786800 | -0.15238100 |
| C             | -3.67830900 | -0.34916500 | 2.23350600  | C            | -4.31113300 | -0.77866400 | 1.97833800  |
| C             | -4.42222100 | -0.44855400 | -0.44743100 | C            | -4.44197600 | -0.00986100 | -0.70220300 |
| C             | -5.03069700 | -0.32929000 | 1.88609500  | C            | -5.52132800 | -0.34872600 | 1.43150500  |
| C             | -5.40190000 | -0.37923400 | 0.54439600  | C            | -5.58554600 | 0.03568900  | 0.09164600  |
| H             | -4.71520400 | -0.49430100 | -1.49145800 | H            | -4.49770400 | 0.27710400  | -1.74654300 |
| H             | -6.45059400 | -0.36906400 | 0.26827500  | H            | -6.52587000 | 0.36292500  | -0.33675000 |
| P             | -1.83465200 | -0.53384000 | -1.51338800 | P            | -1.72415800 | -0.42424800 | -1.21933400 |
| C             | 0.43333600  | 0.67411200  | -0.49679600 | C            | 0.54316000  | 0.72381400  | -0.42966400 |
| C             | 1.16215900  | 1.82467900  | 0.05700700  | C            | 1.32627200  | 1.82939800  | 0.08527100  |

|       |             |             |             |       |             |             |             |
|-------|-------------|-------------|-------------|-------|-------------|-------------|-------------|
| C     | 0.86602500  | 3.12444900  | -0.46423000 | C     | 0.96351000  | 3.17364600  | -0.30203600 |
| C     | -0.20394000 | 3.29367600  | -1.40507500 | C     | -0.21198800 | 3.41224100  | -1.05469600 |
| C     | -1.06659300 | 2.22702100  | -1.71030600 | C     | -1.07872100 | 2.36148100  | -1.35124900 |
| H     | -0.39562900 | 4.28266400  | -1.80550400 | H     | -0.46190900 | 4.42655900  | -1.34299500 |
| H     | -1.93903700 | 2.40674600  | -2.33004300 | H     | -2.02017500 | 2.55651700  | -1.85271300 |
| C     | -2.70175200 | -0.41598100 | 1.24300400  | C     | -3.16216600 | -0.82325900 | 1.19245100  |
| H     | -5.78929700 | -0.27788400 | 2.65919300  | H     | -6.41273600 | -0.31742500 | 2.04740300  |
| H     | -3.38579700 | -0.31225000 | 3.27729400  | H     | -4.26070700 | -1.07942700 | 3.01866300  |
| H     | -1.65523300 | -0.43329900 | 1.52561500  | H     | -2.22407700 | -1.15500700 | 1.62068500  |
| H     | 5.35508600  | -1.03541700 | -0.02046000 | H     | 5.40360200  | -1.22008800 | -0.35807800 |
| H     | 3.31372900  | 0.22477700  | -0.52100500 | H     | 3.37586400  | 0.12086800  | -0.67087100 |
| ***** |             |             |             | ***** |             |             |             |

| 12P34-DMSO-t4 |             |             |             | 12P34-n-hexane-t5 |             |             |             |
|---------------|-------------|-------------|-------------|-------------------|-------------|-------------|-------------|
| C             | 3.10241100  | 2.77357500  | 1.49905300  | C                 | 2.99825200  | 2.81976100  | 1.38588900  |
| C             | 2.82561400  | 4.06630900  | 1.02897900  | C                 | 2.65663000  | 4.10256000  | 0.91932600  |
| H             | 3.41625700  | 4.90895400  | 1.37012700  | H                 | 3.21299300  | 4.97108900  | 1.25136000  |
| C             | 2.36454700  | 1.68175700  | 1.04159800  | C                 | 2.30453800  | 1.70436200  | 0.95385600  |
| H             | 2.59096100  | 0.69981900  | 1.43141000  | H                 | 2.55731700  | 0.73622600  | 1.36083500  |
| C             | 1.77147400  | 4.26297300  | 0.15429500  | C                 | 1.56350400  | 4.25421800  | 0.06759400  |
| H             | 1.51319100  | 5.26315100  | -0.17680000 | H                 | 1.25405800  | 5.24344000  | -0.25212800 |
| C             | 4.43282700  | -1.68346300 | -0.20872200 | C                 | 4.44876100  | -1.51940400 | -0.18891000 |
| C             | 3.27743100  | -0.91695200 | -0.37622100 | C                 | 3.28039900  | -0.82306900 | -0.41698700 |
| C             | 4.34206900  | -3.03490700 | 0.15208000  | C                 | 4.41174000  | -2.85086100 | 0.29517700  |
| H             | 5.24137800  | -3.62115900 | 0.30331300  | H                 | 5.33078300  | -3.38978700 | 0.48925600  |
| C             | 3.09564500  | -3.62568900 | 0.27891900  | C                 | 3.17368600  | -3.48879200 | 0.44818300  |
| H             | 3.01095000  | -4.68236600 | 0.50905300  | H                 | 3.13495900  | -4.53276900 | 0.74201100  |
| C             | 1.89772700  | -2.88123200 | 0.07094900  | C                 | 1.96509600  | -2.81718300 | 0.18037500  |
| C             | 1.98868100  | -1.46278200 | -0.18816100 | C                 | 1.99564900  | -1.40757100 | -0.16176100 |
| C             | 0.64399200  | -3.53959700 | 0.04064700  | C                 | 0.73558700  | -3.51525200 | 0.16538100  |
| H             | 0.60046000  | -4.60577000 | 0.23000900  | H                 | 0.73210100  | -4.56773800 | 0.43019600  |
| C             | -0.50271300 | -2.84427600 | -0.34253700 | C                 | -0.44304300 | -2.90010900 | -0.25402100 |
| H             | -1.43537700 | -3.37583400 | -0.49509700 | H                 | -1.35725600 | -3.47299500 | -0.34899100 |
| C             | -0.44057900 | -1.45905700 | -0.52559900 | C                 | -0.42899300 | -1.52255400 | -0.55173900 |
| C             | 0.75959200  | -0.70801100 | -0.32891200 | C                 | 0.74612800  | -0.73771800 | -0.36568600 |
| C             | -0.71965400 | 1.05923800  | -0.99870700 | C                 | -0.79549800 | 0.94432700  | -1.07030400 |
| H             | 3.89712100  | 2.61663000  | 2.21964500  | H                 | 3.80400200  | 2.70268900  | 2.10166500  |
| C             | -3.22629300 | -0.42391600 | -0.15324700 | C                 | -3.13963600 | -0.44162100 | -0.16251100 |
| C             | -4.33108000 | -0.80936500 | 1.96344200  | C                 | -4.02132700 | -0.19119500 | 2.08204200  |
| C             | -4.43740400 | 0.02362800  | -0.69954000 | C                 | -4.44785200 | -0.57028500 | -0.64597800 |
| C             | -5.53228600 | -0.34958800 | 1.42084900  | C                 | -5.32381700 | -0.30755700 | 1.58993900  |
| C             | -5.58408300 | 0.06705100  | 0.08993900  | C                 | -5.53539700 | -0.49622300 | 0.22477300  |
| H             | -4.48402300 | 0.33585100  | -1.73696800 | H                 | -4.61512800 | -0.72879600 | -1.70626700 |
| H             | -6.51739400 | 0.41757800  | -0.33523100 | H                 | -6.54392200 | -0.58953900 | -0.16262000 |
| P             | -1.72449400 | -0.41961600 | -1.21397000 | P                 | -1.74359500 | -0.58671300 | -1.37735000 |
| C             | 0.54532600  | 0.72458400  | -0.42493000 | C                 | 0.46292400  | 0.69451800  | -0.47078200 |
| C             | 1.33145900  | 1.82885900  | 0.08909400  | C                 | 1.22935600  | 1.81132400  | 0.01300700  |
| C             | 0.97031000  | 3.17402300  | -0.29697400 | C                 | 0.80921300  | 3.13559900  | -0.36348800 |
| C             | -0.20621600 | 3.41502100  | -1.04778300 | C                 | -0.38724600 | 3.31509300  | -1.10265600 |
| C             | -1.07538000 | 2.36589000  | -1.34324000 | C                 | -1.20718700 | 2.23997400  | -1.40869700 |
| H             | -0.45488100 | 4.42978400  | -1.33553500 | H                 | -0.68018900 | 4.32158400  | -1.38216300 |
| H             | -2.01668000 | 2.56293300  | -1.84398400 | H                 | -2.15706500 | 2.40022200  | -1.90552900 |
| C             | -3.17863600 | -0.85152600 | 1.18233600  | C                 | -2.93578600 | -0.25765500 | 1.21398100  |
| H             | -6.42640100 | -0.32035800 | 2.03284300  | H                 | -6.16735100 | -0.25594000 | 2.26914300  |
| H             | -4.29038100 | -1.13546800 | 2.99650100  | H                 | -3.85344400 | -0.04747100 | 3.14384900  |

|       |             |             |             |       |             |             |             |
|-------|-------------|-------------|-------------|-------|-------------|-------------|-------------|
| H     | -2.24783300 | -1.20652000 | 1.60768900  | H     | -1.92811000 | -0.16349900 | 1.60356400  |
| H     | 5.40373300  | -1.22639400 | -0.36312900 | H     | 5.40241700  | -1.04864400 | -0.39835000 |
| H     | 3.37764600  | 0.11814300  | -0.66994700 | H     | 3.33366400  | 0.17449600  | -0.83159300 |
| ***** |             |             |             | ***** |             |             |             |

| 1-A-13-D-P1234-t4 |           |           |           | 1-A-13-D-P1234-t4-CC14 |           |           |           |
|-------------------|-----------|-----------|-----------|------------------------|-----------|-----------|-----------|
| C                 | 2.255721  | -3.653940 | 0.358814  | C                      | 2.310643  | -3.716713 | 0.393018  |
| C                 | 1.732805  | -2.767427 | 1.281912  | C                      | 1.764311  | -2.844798 | 1.297844  |
| C                 | 2.969653  | -3.170181 | -0.734279 | H                      | 1.298713  | -3.221273 | 2.197731  |
| H                 | 3.452599  | -3.861569 | -1.415282 | C                      | 2.986766  | -3.221881 | -0.738762 |
| C                 | 1.872013  | -1.366453 | 1.095279  | H                      | 3.455537  | -3.907234 | -1.435659 |
| C                 | 3.048794  | -1.787899 | -1.006844 | C                      | 1.877192  | -1.410154 | 1.091466  |
| C                 | 2.332767  | -0.866468 | -0.191018 | C                      | 3.021109  | -1.825773 | -1.027916 |
| C                 | 3.794735  | -1.306187 | -2.119998 | C                      | 2.316306  | -0.911596 | -0.174174 |
| H                 | 4.334201  | -2.014653 | -2.737905 | C                      | 3.759873  | -1.340251 | -2.126585 |
| C                 | 3.863366  | 0.035683  | -2.359119 | H                      | 4.302462  | -2.045701 | -2.745299 |
| H                 | 4.507603  | 0.423230  | -3.141049 | C                      | 3.905684  | 0.042533  | -2.332986 |
| C                 | 3.058417  | 0.956268  | -1.631449 | H                      | 4.619462  | 0.415011  | -3.059856 |
| C                 | 2.124453  | 0.472720  | -0.663627 | C                      | 3.147931  | 0.946242  | -1.594709 |
| C                 | 3.185154  | 2.359099  | -1.837143 | C                      | 2.160710  | 0.453116  | -0.635939 |
| H                 | 3.911356  | 2.723215  | -2.554565 | C                      | 3.322003  | 2.358246  | -1.732353 |
| C                 | 2.437066  | 3.226002  | -1.085387 | H                      | 4.099551  | 2.720393  | -2.397246 |
| H                 | 2.596472  | 4.296318  | -1.172492 | C                      | 2.546651  | 3.231672  | -1.033093 |
| C                 | 1.383574  | 2.773863  | -0.246725 | H                      | 2.717781  | 4.300520  | -1.103245 |
| C                 | 1.090357  | 1.375016  | -0.178362 | C                      | 1.423675  | 2.768155  | -0.265508 |
| C                 | 0.574187  | 3.709622  | 0.469577  | C                      | 1.156515  | 1.381687  | -0.185518 |
| H                 | 0.853238  | 4.757881  | 0.442986  | C                      | 0.607477  | 3.726174  | 0.430503  |
| C                 | -0.529758 | 3.303294  | 1.162562  | H                      | 0.925039  | 4.763714  | 0.405873  |
| H                 | -1.125264 | 4.019017  | 1.719648  | C                      | -0.494341 | 3.366850  | 1.141953  |
| C                 | -0.986454 | 1.948551  | 1.073199  | H                      | -1.065968 | 4.091379  | 1.709702  |
| C                 | -0.197740 | 0.978506  | 0.314037  | C                      | -0.964703 | 2.014553  | 1.041608  |
| C                 | -2.178882 | 1.454184  | 1.572634  | C                      | -0.172910 | 1.021810  | 0.294495  |
| H                 | 2.169389  | -4.719827 | 0.527096  | C                      | -2.191931 | 1.558661  | 1.463345  |
| C                 | -0.897436 | -0.244210 | 0.147597  | H                      | -2.906496 | 2.150885  | 2.019468  |
| P                 | -2.412717 | -0.279772 | 1.169722  | H                      | 2.244466  | -4.785696 | 0.559810  |
| C                 | -3.836420 | -0.329791 | -0.037344 | C                      | -0.904212 | -0.140512 | 0.047453  |
| C                 | -3.897682 | 0.505941  | -1.158999 | P                      | -2.402856 | -0.171397 | 1.077104  |
| C                 | -4.877558 | -1.230721 | 0.199443  | C                      | -3.866937 | -0.293219 | -0.037502 |
| C                 | -4.983873 | 0.439098  | -2.025948 | C                      | -4.016745 | 0.523583  | -1.166879 |
| H                 | -3.090755 | 1.204098  | -1.351620 | C                      | -4.853114 | -1.237455 | 0.266148  |
| C                 | -5.969775 | -1.295634 | -0.668006 | C                      | -5.140751 | 0.394175  | -1.976334 |
| H                 | -4.831946 | -1.885626 | 1.063511  | H                      | -3.253301 | 1.252441  | -1.413219 |
| C                 | -6.023318 | -0.461255 | -1.780887 | C                      | -5.981255 | -1.361545 | -0.546095 |
| H                 | -5.021189 | 1.086854  | -2.895298 | H                      | -4.738914 | -1.877946 | 1.133566  |
| H                 | -6.772062 | -1.999742 | -0.475561 | C                      | -6.125093 | -0.546967 | -1.665935 |
| H                 | -6.868345 | -0.512050 | -2.458791 | H                      | -5.249008 | 1.025414  | -2.851146 |
| H                 | 1.314210  | -3.146541 | 2.202988  | H                      | -6.740266 | -2.097005 | -0.304935 |
| N                 | 1.699088  | -0.546673 | 2.170964  | H                      | -6.998814 | -0.645596 | -2.300211 |
| C                 | 0.876038  | -0.945363 | 3.309589  | N                      | 1.630880  | -0.575728 | 2.166976  |

|       |           |           |           |       |           |           |           |
|-------|-----------|-----------|-----------|-------|-----------|-----------|-----------|
| H     | 0.470131  | -0.040303 | 3.761822  | C     | 2.508034  | 0.552308  | 2.478150  |
| H     | 0.041980  | -1.559156 | 2.980027  | H     | 1.932810  | 1.472518  | 2.611267  |
| H     | 1.466874  | -1.477336 | 4.064795  | H     | 3.044536  | 0.341027  | 3.411988  |
| C     | 2.504317  | 0.650953  | 2.413732  | H     | 3.233330  | 0.702863  | 1.684529  |
| H     | 1.870716  | 1.535482  | 2.484007  | C     | 0.821629  | -1.009808 | 3.298386  |
| H     | 3.028556  | 0.512414  | 3.366260  | H     | 0.404276  | -0.124032 | 3.782324  |
| H     | 3.234105  | 0.791551  | 1.623728  | H     | -0.007396 | -1.630904 | 2.965327  |
| H     | -2.876899 | 2.034071  | 2.161348  | H     | 1.411428  | -1.557224 | 4.046286  |
| C     | -0.615611 | -1.277330 | -0.748854 | C     | -0.637389 | -1.191914 | -0.842261 |
| N     | -0.431613 | -2.151382 | -1.497793 | N     | -0.546470 | -2.066512 | -1.601910 |
| ***** |           |           |           | ***** |           |           |           |

| 1-A-13-D-P1234-t4-DCM |           |           |           | 1-A-13-D-P1234-t4-DMSO |           |           |           |
|-----------------------|-----------|-----------|-----------|------------------------|-----------|-----------|-----------|
| C                     | 2.346870  | -3.644512 | 0.294934  | C                      | 2.349565  | -3.646487 | 0.300481  |
| C                     | 1.795015  | -2.787416 | 1.228890  | C                      | 1.796505  | -2.787955 | 1.232594  |
| H                     | 1.395054  | -3.194921 | 2.145639  | H                      | 1.401378  | -3.194271 | 2.151945  |
| C                     | 3.045644  | -3.123878 | -0.793315 | C                      | 3.046364  | -3.127324 | -0.790232 |
| H                     | 3.561759  | -3.789513 | -1.475259 | H                      | 3.566526  | -3.793467 | -1.468557 |
| C                     | 1.898955  | -1.379062 | 1.069280  | C                      | 1.898033  | -1.379815 | 1.069956  |
| C                     | 3.076322  | -1.739104 | -1.046986 | C                      | 3.073292  | -1.743766 | -1.047464 |
| C                     | 2.342108  | -0.844316 | -0.210587 | C                      | 2.339391  | -0.846952 | -0.211460 |
| C                     | 3.806185  | -1.224996 | -2.158841 | C                      | 3.801858  | -1.231632 | -2.161824 |
| H                     | 4.362120  | -1.914350 | -2.783521 | H                      | 4.359298  | -1.922283 | -2.783731 |
| C                     | 3.843166  | 0.119340  | -2.385287 | C                      | 3.837888  | 0.111755  | -2.392514 |
| H                     | 4.474550  | 0.530864  | -3.165104 | H                      | 4.469091  | 0.521654  | -3.173254 |
| C                     | 3.025987  | 1.013321  | -1.635211 | C                      | 3.022090  | 1.007755  | -1.642248 |
| C                     | 2.109381  | 0.496430  | -0.661066 | C                      | 2.107020  | 0.492694  | -0.664285 |
| C                     | 3.132536  | 2.416948  | -1.818698 | C                      | 3.130686  | 2.409997  | -1.827724 |
| H                     | 3.850342  | 2.801006  | -2.533985 | H                      | 3.848786  | 2.791741  | -2.543913 |
| C                     | 2.379797  | 3.266974  | -1.045201 | C                      | 2.381097  | 3.263661  | -1.053252 |
| H                     | 2.530311  | 4.339670  | -1.113558 | H                      | 2.535290  | 4.335717  | -1.122259 |
| C                     | 1.341347  | 2.787120  | -0.208998 | C                      | 1.343893  | 2.786839  | -0.215173 |
| C                     | 1.068580  | 1.381393  | -0.155219 | C                      | 1.068930  | 1.381248  | -0.158112 |
| C                     | 0.524691  | 3.704590  | 0.525461  | C                      | 0.530270  | 3.707364  | 0.519850  |
| H                     | 0.796199  | 4.755137  | 0.514608  | H                      | 0.805724  | 4.756834  | 0.508664  |
| C                     | -0.569563 | 3.279452  | 1.219847  | C                      | -0.563638 | 3.286312  | 1.216611  |
| H                     | -1.167945 | 3.979556  | 1.793198  | H                      | -1.158450 | 3.988051  | 1.791537  |
| C                     | -1.009741 | 1.918752  | 1.112168  | C                      | -1.006898 | 1.926064  | 1.110720  |
| C                     | -0.208953 | 0.966516  | 0.340608  | C                      | -0.207844 | 0.970786  | 0.340858  |
| C                     | -2.194306 | 1.408240  | 1.609477  | C                      | -2.192119 | 1.419504  | 1.609759  |
| H                     | -2.891743 | 1.973946  | 2.212947  | H                      | -2.885706 | 1.987451  | 2.215598  |
| H                     | 2.303703  | -4.714010 | 0.456048  | H                      | 2.312171  | -4.715401 | 0.466856  |
| C                     | -0.899517 | -0.263934 | 0.165046  | C                      | -0.901362 | -0.259473 | 0.169737  |
| P                     | -2.416999 | -0.324922 | 1.188597  | P                      | -2.417557 | -0.315315 | 1.197102  |
| C                     | -3.833127 | -0.352556 | -0.031189 | C                      | -3.832642 | -0.348752 | -0.023945 |
| C                     | -3.880655 | 0.490273  | -1.149612 | C                      | -3.899578 | 0.515992  | -1.124956 |
| C                     | -4.885628 | -1.245484 | 0.191963  | C                      | -4.863730 | -1.271559 | 0.178276  |
| C                     | -4.961708 | 0.439156  | -2.025522 | C                      | -4.977658 | 0.456747  | -2.004311 |
| H                     | -3.067618 | 1.183993  | -1.333941 | H                      | -3.104740 | 1.234835  | -1.292219 |
| C                     | -5.973305 | -1.295317 | -0.683967 | C                      | -5.948075 | -1.330560 | -0.701624 |
| H                     | -4.855479 | -1.906107 | 1.052439  | H                      | -4.820525 | -1.947635 | 1.026092  |
| C                     | -6.011972 | -0.453534 | -1.792920 | C                      | -6.005680 | -0.467054 | -1.793087 |
| H                     | -4.987833 | 1.093746  | -2.890042 | H                      | -5.019558 | 1.129609  | -2.854029 |
| H                     | -6.783650 | -1.992264 | -0.500194 | H                      | -6.741620 | -2.050350 | -0.533631 |
| H                     | -6.853094 | -0.491784 | -2.476231 | H                      | -6.844789 | -0.511274 | -2.478415 |

|       |           |           |           |       |           |           |           |
|-------|-----------|-----------|-----------|-------|-----------|-----------|-----------|
| N     | 1.720308  | -0.588690 | 2.164182  | N     | 1.720151  | -0.587835 | 2.163767  |
| C     | 0.958041  | -1.049984 | 3.324813  | C     | 2.506858  | 0.621248  | 2.420450  |
| H     | 0.554949  | -0.171882 | 3.828894  | H     | 1.854078  | 1.488491  | 2.524464  |
| H     | 0.129390  | -1.679571 | 3.012439  | H     | 3.043299  | 0.470945  | 3.361858  |
| H     | 1.598413  | -1.590039 | 4.029530  | H     | 3.223757  | 0.792981  | 1.625370  |
| C     | 2.504783  | 0.621073  | 2.423056  | C     | 0.964314  | -1.049661 | 3.328769  |
| H     | 1.851493  | 1.488207  | 2.524317  | H     | 0.561140  | -0.171696 | 3.833056  |
| H     | 3.039610  | 0.471732  | 3.365883  | H     | 0.137288  | -1.683895 | 3.021709  |
| H     | 3.223291  | 0.793675  | 1.629504  | H     | 1.610408  | -1.585298 | 4.031072  |
| C     | -0.645657 | -1.265198 | -0.765908 | C     | -0.657959 | -1.257299 | -0.765103 |
| N     | -0.514664 | -2.116310 | -1.556277 | N     | -0.539396 | -2.105177 | -1.562226 |
| ***** |           |           |           | ***** |           |           |           |

|                            |           |           |           |                   |           |           |           |
|----------------------------|-----------|-----------|-----------|-------------------|-----------|-----------|-----------|
| 1-A-13-D-P1234-t4-n-hexane |           |           |           | 3-A-12-D-P1234-t4 |           |           |           |
| C                          | 2.309686  | -3.715918 | 0.394933  | C                 | 3.298332  | 2.980126  | 0.405715  |
| C                          | 1.765181  | -2.843269 | 1.299956  | C                 | 2.440361  | 2.506552  | -0.585328 |
| H                          | 1.300499  | -3.218877 | 2.200721  | C                 | 3.860983  | 2.091079  | 1.329170  |
| C                          | 2.984410  | -3.221945 | -0.738157 | H                 | 4.563706  | 2.465730  | 2.064762  |
| H                          | 3.451107  | -3.908004 | -1.435739 | C                 | 2.121945  | 1.085805  | -0.590441 |
| C                          | 1.877920  | -1.408953 | 1.092004  | H                 | 1.489605  | 0.696036  | -1.369675 |
| C                          | 3.019383  | -1.826132 | -1.028172 | C                 | 3.571432  | 0.694876  | 1.320712  |
| C                          | 2.315899  | -0.911371 | -0.174386 | C                 | 2.593897  | 0.204841  | 0.385803  |
| C                          | 3.756942  | -1.341390 | -2.128005 | C                 | 4.267003  | -0.217431 | 2.133001  |
| H                          | 4.298476  | -2.047302 | -2.747081 | H                 | 5.018528  | 0.152253  | 2.821386  |
| C                          | 3.902552  | 0.041015  | -2.335398 | C                 | 4.118718  | -1.608510 | 1.938200  |
| H                          | 4.615462  | 0.413018  | -3.063370 | H                 | 4.785004  | -2.296491 | 2.448172  |
| C                          | 3.145816  | 0.945409  | -1.596858 | C                 | 3.155185  | -2.118749 | 1.070633  |
| C                          | 2.159830  | 0.452893  | -0.636577 | C                 | 2.222186  | -1.203472 | 0.422246  |
| C                          | 3.319878  | 2.357087  | -1.735328 | C                 | 3.078145  | -3.511304 | 0.789390  |
| H                          | 4.096406  | 2.718942  | -2.401573 | H                 | 3.808303  | -4.173215 | 1.243229  |
| C                          | 2.545477  | 3.230875  | -1.035367 | C                 | 2.123817  | -4.000370 | -0.053746 |
| H                          | 2.716658  | 4.299681  | -1.106213 | H                 | 2.097731  | -5.053354 | -0.310820 |
| C                          | 1.423116  | 2.767801  | -0.266745 | C                 | 1.075628  | -3.151022 | -0.534849 |
| C                          | 1.155919  | 1.381618  | -0.185653 | C                 | 1.055516  | -1.779068 | -0.204170 |
| C                          | 0.606930  | 3.726301  | 0.428843  | C                 | 0.032293  | -3.733500 | -1.342501 |
| H                          | 0.924695  | 4.763790  | 0.403476  | H                 | 0.154663  | -4.769617 | -1.641218 |
| C                          | -0.494890 | 3.367689  | 1.140371  | C                 | -1.064303 | -3.040173 | -1.743488 |
| H                          | -1.066595 | 4.092706  | 1.707444  | H                 | -1.822412 | -3.491593 | -2.372209 |
| C                          | -0.965418 | 2.015293  | 1.041222  | C                 | -1.257410 | -1.714624 | -1.240252 |
| C                          | -0.173370 | 1.021709  | 0.295216  | C                 | -0.210571 | -1.080161 | -0.427232 |
| C                          | -2.192710 | 1.560007  | 1.463131  | C                 | -2.417739 | -0.960195 | -1.356898 |
| H                          | -2.907431 | 2.153024  | 2.018210  | H                 | 3.563551  | 4.026028  | 0.463080  |
| H                          | 2.242758  | -4.784783 | 0.562052  | C                 | -0.634051 | 0.104808  | 0.138509  |
| C                          | -0.904209 | -0.141036 | 0.049750  | P                 | -2.174423 | 0.655049  | -0.575820 |
| P                          | -2.403227 | -0.170694 | 1.078791  | C                 | -3.425795 | 0.815855  | 0.768598  |
| C                          | -3.866297 | -0.293094 | -0.037185 | C                 | -3.481615 | -0.079008 | 1.845907  |
| C                          | -4.013823 | 0.521653  | -1.168257 | C                 | -4.344069 | 1.868268  | 0.698487  |
| C                          | -4.853727 | -1.235812 | 0.266729  | C                 | -4.446646 | 0.081082  | 2.834894  |
| C                          | -5.136786 | 0.391825  | -1.978960 | H                 | -2.772078 | -0.895919 | 1.906512  |
| H                          | -3.249093 | 1.249050  | -1.414902 | C                 | -5.313093 | 2.022495  | 1.690255  |
| C                          | -5.980857 | -1.360357 | -0.546752 | H                 | -4.304098 | 2.564927  | -0.131429 |
| H                          | -4.741015 | -1.874981 | 1.135330  | C                 | -5.363866 | 1.130954  | 2.758013  |
| C                          | -6.122407 | -0.547755 | -1.668213 | H                 | -4.485688 | -0.614796 | 3.665487  |
| H                          | -5.243139 | 1.021382  | -2.855231 | H                 | -6.024191 | 2.838246  | 1.626191  |
| H                          | -6.740806 | -2.094804 | -0.305395 | H                 | -6.115592 | 1.250876  | 3.530028  |

|       |           |           |           |       |           |           |           |
|-------|-----------|-----------|-----------|-------|-----------|-----------|-----------|
| H     | -6.995293 | -0.646837 | -2.303592 | H     | -0.050266 | 0.714149  | 0.810407  |
| N     | 1.632030  | -0.572568 | 2.166594  | N     | 1.836161  | 3.332719  | -1.514543 |
| C     | 2.512134  | 0.553020  | 2.477618  | C     | 1.272679  | 2.799506  | -2.753170 |
| H     | 1.938854  | 1.473943  | 2.614482  | H     | 0.755138  | 3.603913  | -3.273944 |
| H     | 3.051842  | 0.339052  | 3.409208  | H     | 2.046259  | 2.396579  | -3.420107 |
| H     | 3.234855  | 0.704324  | 1.681801  | H     | 0.539235  | 2.019335  | -2.552668 |
| C     | 0.821829  | -1.004649 | 3.297678  | C     | 2.158500  | 4.751158  | -1.506833 |
| H     | 0.404802  | -0.118085 | 3.780614  | H     | 3.198005  | 4.943323  | -1.809056 |
| H     | -0.007657 | -1.625108 | 2.964485  | H     | 1.495356  | 5.272537  | -2.195619 |
| H     | 1.410302  | -1.552168 | 4.046802  | H     | 2.008824  | 5.168935  | -0.509118 |
| C     | -0.636079 | -1.195410 | -0.836543 | C     | -3.568130 | -1.343261 | -2.067628 |
| N     | -0.543636 | -2.073168 | -1.592132 | N     | -4.528906 | -1.650286 | -2.641753 |
| ***** |           |           |           | ***** |           |           |           |

| 3-A-12-D-P1234-t3-CCI4 |           |           |           | 3-A-12-D-P1234-t3-DCM |           |           |           |
|------------------------|-----------|-----------|-----------|-----------------------|-----------|-----------|-----------|
| C                      | 3.537841  | 2.771109  | 0.368750  | C                     | 3.490619  | 2.808875  | 0.358348  |
| C                      | 2.589177  | 2.355921  | -0.613113 | C                     | 2.552074  | 2.377498  | -0.626537 |
| C                      | 4.037902  | 1.874458  | 1.282410  | C                     | 4.000557  | 1.922785  | 1.277947  |
| H                      | 4.797680  | 2.199615  | 1.985561  | H                     | 4.752118  | 2.262580  | 1.982869  |
| C                      | 2.156065  | 1.027286  | -0.576335 | C                     | 2.139322  | 1.040859  | -0.587052 |
| H                      | 1.464262  | 0.677147  | -1.322578 | H                     | 1.456100  | 0.677854  | -1.335359 |
| C                      | 3.627085  | 0.524555  | 1.306054  | C                     | 3.610325  | 0.567052  | 1.304692  |
| C                      | 2.601634  | 0.108309  | 0.397659  | C                     | 2.595352  | 0.132802  | 0.392790  |
| C                      | 4.291117  | -0.429121 | 2.134906  | C                     | 4.285977  | -0.373968 | 2.139505  |
| H                      | 5.058127  | -0.083056 | 2.819449  | H                     | 5.045318  | -0.013366 | 2.825021  |
| C                      | 4.027315  | -1.754811 | 1.994309  | C                     | 4.043652  | -1.704651 | 2.003395  |
| H                      | 4.594246  | -2.498392 | 2.543351  | H                     | 4.620680  | -2.437607 | 2.555906  |
| C                      | 2.988182  | -2.207056 | 1.115390  | C                     | 3.014080  | -2.175021 | 1.122923  |
| C                      | 2.145018  | -1.271008 | 0.441525  | C                     | 2.158304  | -1.252407 | 0.442616  |
| C                      | 2.824976  | -3.589935 | 0.885115  | C                     | 2.871739  | -3.560523 | 0.895828  |
| H                      | 3.498417  | -4.286068 | 1.372800  | H                     | 3.554651  | -4.245456 | 1.385833  |
| C                      | 1.862880  | -4.049063 | 0.008113  | C                     | 1.916844  | -4.036979 | 0.019564  |
| H                      | 1.796732  | -5.106292 | -0.224773 | H                     | 1.866778  | -5.095761 | -0.209484 |
| C                      | 0.905143  | -3.171881 | -0.531788 | C                     | 0.945472  | -3.175386 | -0.522637 |
| C                      | 0.956783  | -1.777834 | -0.216720 | C                     | 0.977375  | -1.779056 | -0.213484 |
| C                      | -0.157032 | -3.711376 | -1.334093 | C                     | -0.110041 | -3.733387 | -1.318489 |
| H                      | -0.102354 | -4.757140 | -1.615011 | H                     | -0.041591 | -4.779208 | -1.595552 |
| C                      | -1.218100 | -2.938749 | -1.738037 | C                     | -1.185621 | -2.976539 | -1.721716 |
| H                      | -2.010073 | -3.357446 | -2.347777 | H                     | -1.972448 | -3.412536 | -2.326100 |
| C                      | -1.309230 | -1.603314 | -1.301305 | C                     | -1.294749 | -1.642379 | -1.290945 |
| C                      | -0.251242 | -1.019947 | -0.451021 | C                     | -0.241181 | -1.039141 | -0.449022 |
| C                      | -2.422537 | -0.744137 | -1.505449 | C                     | -2.421707 | -0.796664 | -1.491890 |
| H                      | 3.901711  | 3.788840  | 0.382426  | H                     | 3.839814  | 3.831662  | 0.370060  |
| C                      | -0.631419 | 0.194223  | 0.129576  | C                     | -0.637489 | 0.173040  | 0.127627  |
| P                      | -2.213486 | 0.688353  | -0.457330 | P                     | -2.218615 | 0.655352  | -0.464245 |
| C                      | -3.473270 | 0.881480  | 0.860866  | C                     | -3.474419 | 0.870936  | 0.855016  |
| C                      | -3.090723 | 0.981710  | 2.206527  | C                     | -3.099695 | 0.878054  | 2.206791  |
| C                      | -4.826731 | 1.000668  | 0.507868  | C                     | -4.813566 | 1.094999  | 0.498724  |
| C                      | -4.058441 | 1.171591  | 3.188864  | C                     | -4.064349 | 1.078728  | 3.190575  |
| H                      | -2.047060 | 0.887447  | 2.482996  | H                     | -2.066383 | 0.708411  | 2.485524  |
| C                      | -5.787848 | 1.178431  | 1.497282  | C                     | -5.772697 | 1.282330  | 1.488918  |
| H                      | -5.129446 | 0.940259  | -0.531653 | H                     | -5.107080 | 1.115875  | -0.545005 |
| C                      | -5.405477 | 1.268414  | 2.837127  | C                     | -5.399269 | 1.277890  | 2.834522  |
| H                      | -3.762268 | 1.236272  | 4.229749  | H                     | -3.775276 | 1.073458  | 4.235329  |
| H                      | -6.834164 | 1.249963  | 1.223742  | H                     | -6.808876 | 1.438049  | 1.212035  |

|       |           |           |           |       |           |           |           |
|-------|-----------|-----------|-----------|-------|-----------|-----------|-----------|
| H     | -6.156192 | 1.414745  | 3.605283  | H     | -6.146985 | 1.432677  | 3.603797  |
| H     | -0.021746 | 0.798273  | 0.778219  | H     | -0.035533 | 0.786504  | 0.774840  |
| N     | 2.116837  | 3.251017  | -1.558450 | N     | 2.071306  | 3.261714  | -1.575081 |
| C     | 1.264244  | 2.763957  | -2.633247 | C     | 1.238070  | 2.758282  | -2.658523 |
| H     | 0.926762  | 3.610038  | -3.229779 | H     | 0.892728  | 3.597793  | -3.259303 |
| H     | 1.781931  | 2.056149  | -3.296533 | H     | 1.776149  | 2.059732  | -3.315079 |
| H     | 0.378408  | 2.266685  | -2.229200 | H     | 0.356967  | 2.245808  | -2.263528 |
| C     | 2.806968  | 4.517619  | -1.770444 | C     | 2.739144  | 4.542851  | -1.781641 |
| H     | 3.844312  | 4.382508  | -2.106975 | H     | 3.781359  | 4.426289  | -2.108451 |
| H     | 2.273043  | 5.084486  | -2.531316 | H     | 2.201307  | 5.097867  | -2.548063 |
| H     | 2.815602  | 5.122857  | -0.860612 | H     | 2.728103  | 5.147887  | -0.872011 |
| C     | -3.543227 | -1.022755 | -2.284663 | C     | -3.537217 | -1.096546 | -2.265770 |
| N     | -4.480830 | -1.240253 | -2.942146 | N     | -4.471322 | -1.338116 | -2.922355 |
| ***** |           |           |           | ***** |           |           |           |

|                        |           |           |           |                            |           |           |           |
|------------------------|-----------|-----------|-----------|----------------------------|-----------|-----------|-----------|
| 3-A-12-D-P1234-t3-DMSO |           |           |           | 3-A-12-D-P1234-t3-n-hexane |           |           |           |
| C                      | 3.479440  | 2.818861  | 0.354525  | C                          | 3.546584  | 2.765261  | 0.367027  |
| C                      | 2.541834  | 2.383418  | -0.629647 | C                          | 2.595513  | 2.351741  | -0.613252 |
| C                      | 3.992940  | 1.935689  | 1.275125  | C                          | 4.045564  | 1.867750  | 1.280145  |
| H                      | 4.743263  | 2.279359  | 1.979384  | H                          | 4.807171  | 2.191028  | 1.982191  |
| C                      | 2.134656  | 1.044680  | -0.588897 | C                          | 2.158706  | 1.024684  | -0.575127 |
| H                      | 1.452486  | 0.678426  | -1.336632 | H                          | 1.464469  | 0.676235  | -1.319831 |
| C                      | 3.607796  | 0.578419  | 1.303582  | C                          | 3.631146  | 0.518853  | 1.304930  |
| C                      | 2.594518  | 0.139436  | 0.392035  | C                          | 2.603065  | 0.104773  | 0.398469  |
| C                      | 4.287135  | -0.359061 | 2.139572  | C                          | 4.293425  | -0.435983 | 2.133562  |
| H                      | 5.045059  | 0.005375  | 2.824605  | H                          | 5.062156  | -0.091737 | 2.817102  |
| C                      | 4.050230  | -1.691127 | 2.005132  | C                          | 4.025835  | -1.760957 | 1.993693  |
| H                      | 4.630300  | -2.421135 | 2.558261  | H                          | 4.591272  | -2.505740 | 2.542700  |
| C                      | 3.022457  | -2.166316 | 1.125239  | C                          | 2.984597  | -2.211016 | 1.116132  |
| C                      | 2.163015  | -1.247413 | 0.443667  | C                          | 2.143444  | -1.273549 | 0.442575  |
| C                      | 2.886071  | -3.552657 | 0.898656  | C                          | 2.818472  | -3.593741 | 0.886276  |
| H                      | 3.572080  | -4.234470 | 1.388568  | H                          | 3.490665  | -4.291093 | 1.374002  |
| C                      | 1.933056  | -4.033801 | 0.022871  | C                          | 1.855479  | -4.050860 | 0.009381  |
| H                      | 1.887755  | -5.092836 | -0.205669 | H                          | 1.787068  | -5.107953 | -0.223601 |
| C                      | 0.957398  | -3.176435 | -0.519134 | C                          | 0.899732  | -3.171760 | -0.530765 |
| C                      | 0.983866  | -1.779535 | -0.211339 | C                          | 0.953983  | -1.777947 | -0.215500 |
| C                      | -0.096806 | -3.739520 | -1.312422 | C                          | -0.163742 | -3.709398 | -1.333102 |
| H                      | -0.024995 | -4.785407 | -1.588155 | H                          | -0.111009 | -4.755361 | -1.613746 |
| C                      | -1.176384 | -2.986815 | -1.714989 | C                          | -1.223064 | -2.935072 | -1.736940 |
| H                      | -1.961972 | -3.427583 | -2.317605 | H                          | -2.016172 | -3.351647 | -2.346646 |
| C                      | -1.290023 | -1.652972 | -1.285895 | C                          | -1.311540 | -1.599115 | -1.300116 |
| C                      | -0.237733 | -1.044605 | -0.446430 | C                          | -0.252613 | -1.017673 | -0.449849 |
| C                      | -2.420702 | -0.810540 | -1.485802 | C                          | -2.423217 | -0.738599 | -1.504934 |
| H                      | 3.825198  | 3.842767  | 0.365184  | H                          | 3.912946  | 3.782127  | 0.379700  |
| C                      | -0.638186 | 0.166870  | 0.129935  | C                          | -0.630047 | 0.197591  | 0.129827  |
| P                      | -2.218259 | 0.647041  | -0.464013 | P                          | -2.212590 | 0.692642  | -0.456659 |
| C                      | -3.475548 | 0.868987  | 0.852361  | C                          | -3.473593 | 0.884013  | 0.860503  |
| C                      | -3.105109 | 0.868276  | 2.205416  | C                          | -3.090488 | 1.011615  | 2.203684  |
| C                      | -4.811916 | 1.104584  | 0.492359  | C                          | -4.829469 | 0.975979  | 0.508424  |
| C                      | -4.071987 | 1.070914  | 3.186853  | C                          | -4.059191 | 1.201626  | 3.184883  |
| H                      | -2.073633 | 0.692656  | 2.487081  | H                          | -2.045037 | 0.937837  | 2.479764  |
| C                      | -5.773277 | 1.293964  | 1.480159  | C                          | -5.791340 | 1.154332  | 1.496948  |
| H                      | -5.101302 | 1.135225  | -0.552303 | H                          | -5.133247 | 0.892617  | -0.529195 |
| C                      | -5.404415 | 1.280496  | 2.827136  | C                          | -5.408168 | 1.271736  | 2.834387  |
| H                      | -3.786295 | 1.060190  | 4.232444  | H                          | -3.762256 | 1.287215  | 4.224063  |

|       |           |           |           |       |           |           |           |
|-------|-----------|-----------|-----------|-------|-----------|-----------|-----------|
| H     | -6.807170 | 1.459683  | 1.200631  | H     | -6.839192 | 1.204416  | 1.224441  |
| H     | -6.153590 | 1.437433  | 3.594497  | H     | -6.159782 | 1.418278  | 3.601653  |
| H     | -0.038180 | 0.782481  | 0.776991  | H     | -0.019257 | 0.800585  | 0.778342  |
| N     | 2.056372  | 3.265213  | -1.577696 | N     | 2.124146  | 3.247623  | -1.558700 |
| C     | 1.229564  | 2.756240  | -2.663911 | C     | 1.266354  | 2.762807  | -2.630115 |
| H     | 0.879145  | 3.593870  | -3.264245 | H     | 0.930520  | 3.609435  | -3.226881 |
| H     | 1.775140  | 2.063082  | -3.320008 | H     | 1.778887  | 2.051757  | -3.293968 |
| H     | 0.351774  | 2.236352  | -2.271556 | H     | 0.379656  | 2.269754  | -2.222639 |
| C     | 2.722857  | 4.546990  | -1.789326 | C     | 2.816322  | 4.512510  | -1.772035 |
| H     | 3.761698  | 4.430120  | -2.126354 | H     | 3.853238  | 4.375484  | -2.109325 |
| H     | 2.177385  | 5.102721  | -2.549751 | H     | 2.282927  | 5.080026  | -2.532859 |
| H     | 2.720744  | 5.150543  | -0.879015 | H     | 2.826862  | 5.118471  | -0.862605 |
| C     | -3.535617 | -1.116274 | -2.256329 | C     | -3.544808 | -1.014727 | -2.284601 |
| N     | -4.470054 | -1.365069 | -2.910756 | N     | -4.483385 | -1.229140 | -2.941276 |
| ***** |           |           |           | ***** |           |           |           |

|                   |           |           |           |                        |           |           |           |
|-------------------|-----------|-----------|-----------|------------------------|-----------|-----------|-----------|
| 1-A-11-D-P1234-t3 |           |           |           | 1-A-11-D-P1234-t3-CC14 |           |           |           |
| C                 | -3.537591 | -1.887173 | -0.338848 | C                      | -3.547991 | -1.885425 | -0.337709 |
| C                 | -2.544487 | -1.437298 | -1.259086 | C                      | -2.547530 | -1.442084 | -1.253208 |
| H                 | -2.298838 | -2.032613 | -2.127139 | H                      | -2.303951 | -2.038082 | -2.121296 |
| C                 | -3.882698 | -1.008954 | 0.686388  | C                      | -3.892532 | -1.001309 | 0.686413  |
| H                 | -4.695360 | -1.236194 | 1.362347  | H                      | -4.710572 | -1.222092 | 1.357937  |
| C                 | -1.858558 | -0.245962 | -1.070005 | C                      | -1.856742 | -0.253159 | -1.063216 |
| H                 | -1.120022 | 0.040189  | -1.805767 | C                      | -3.223912 | 0.238731  | 0.861281  |
| C                 | -3.220644 | 0.235094  | 0.861034  | C                      | -2.101359 | 0.584503  | 0.029506  |
| C                 | -2.101089 | 0.585863  | 0.026743  | C                      | -3.706630 | 1.196837  | 1.769818  |
| C                 | -3.705449 | 1.191507  | 1.768293  | H                      | -4.552430 | 0.959610  | 2.404646  |
| H                 | -4.549046 | 0.951867  | 2.405294  | C                      | -3.159671 | 2.489819  | 1.787524  |
| C                 | -3.162723 | 2.486154  | 1.782907  | H                      | -3.600759 | 3.243381  | 2.431445  |
| H                 | -3.604986 | 3.238989  | 2.427256  | C                      | -2.040229 | 2.844536  | 1.009668  |
| C                 | -2.043751 | 2.845116  | 1.005250  | C                      | -1.370715 | 1.829897  | 0.251235  |
| C                 | -1.370751 | 1.832891  | 0.249789  | C                      | -1.561136 | 4.189730  | 0.979874  |
| C                 | -1.566831 | 4.190411  | 0.977235  | H                      | -2.095456 | 4.949404  | 1.539017  |
| H                 | -2.103236 | 4.949539  | 1.535285  | C                      | -0.489642 | 4.520412  | 0.182960  |
| C                 | -0.493512 | 4.521725  | 0.184104  | H                      | -0.192037 | 5.557061  | 0.066430  |
| H                 | -0.195997 | 5.558691  | 0.069067  | C                      | 0.259472  | 3.522544  | -0.472094 |
| C                 | 0.258781  | 3.525382  | -0.469471 | C                      | -0.089939 | 2.125338  | -0.291490 |
| C                 | -0.089767 | 2.128606  | -0.290719 | C                      | 1.346541  | 3.877305  | -1.337034 |
| C                 | 1.348100  | 3.881240  | -1.330378 | H                      | 1.527107  | 4.932004  | -1.516817 |
| H                 | 1.529252  | 4.936142  | -1.508340 | C                      | 2.126401  | 2.935855  | -1.934726 |
| C                 | 2.129531  | 2.940344  | -1.926883 | H                      | 2.924200  | 3.219733  | -2.611490 |
| H                 | 2.929385  | 3.225980  | -2.600601 | C                      | 1.984439  | 1.546851  | -1.568879 |
| C                 | 1.987181  | 1.551079  | -1.565259 | C                      | 0.927718  | 1.149802  | -0.663695 |
| C                 | 0.928883  | 1.152493  | -0.662620 | C                      | 2.859719  | 0.518040  | -1.911915 |
| C                 | 2.862984  | 0.522427  | -1.906352 | H                      | 3.699919  | 0.638674  | -2.582791 |
| H                 | 3.705525  | 0.643201  | -2.574162 | C                      | 1.114182  | -0.169711 | -0.188377 |
| C                 | 1.112142  | -0.166573 | -0.188327 | P                      | 2.389076  | -1.048321 | -1.172309 |
| P                 | 2.387471  | -1.043957 | -1.170298 | C                      | 3.755848  | -1.450340 | 0.022339  |
| C                 | 3.752483  | -1.449501 | 0.025740  | C                      | 4.300095  | -0.498833 | 0.895360  |
| C                 | 4.282377  | -0.505221 | 0.914585  | C                      | 4.252058  | -2.757499 | 0.040034  |
| C                 | 4.262537  | -2.750963 | 0.027041  | C                      | 5.323163  | -0.853224 | 1.769566  |
| C                 | 5.304917  | -0.861220 | 1.788127  | H                      | 3.918528  | 0.516038  | 0.892276  |
| H                 | 3.888830  | 0.504976  | 0.923766  | C                      | 5.280240  | -3.111657 | 0.915542  |
| C                 | 5.290693  | -3.106569 | 0.901447  | H                      | 3.832372  | -3.500603 | -0.629703 |
| H                 | 3.852425  | -3.488173 | -0.655083 | C                      | 5.815914  | -2.160393 | 1.779965  |

|       |           |           |           |       |           |           |           |
|-------|-----------|-----------|-----------|-------|-----------|-----------|-----------|
| C     | 5.811909  | -2.162543 | 1.781806  | H     | 5.736346  | -0.112019 | 2.444881  |
| H     | 5.706695  | -0.125636 | 2.476454  | H     | 5.656796  | -4.128484 | 0.922864  |
| H     | 5.678293  | -4.119335 | 0.895929  | H     | 6.612584  | -2.433916 | 2.462805  |
| H     | 6.608414  | -2.437371 | 2.464427  | H     | -1.117392 | 0.028635  | -1.799928 |
| N     | -4.126033 | -3.131131 | -0.485645 | N     | -4.146149 | -3.120497 | -0.487200 |
| C     | -3.964551 | -3.881139 | -1.723086 | C     | -5.251352 | -3.483208 | 0.385425  |
| H     | -2.909534 | -4.070602 | -1.935826 | H     | -6.141838 | -2.859453 | 0.219628  |
| H     | -4.451222 | -4.849071 | -1.612038 | H     | -5.521779 | -4.522274 | 0.205047  |
| H     | -4.409089 | -3.372208 | -2.590164 | H     | -4.959210 | -3.391799 | 1.434944  |
| C     | -5.215019 | -3.505158 | 0.399694  | C     | -3.961455 | -3.886852 | -1.713115 |
| H     | -6.117229 | -2.894139 | 0.245354  | H     | -2.903375 | -4.087054 | -1.898279 |
| H     | -5.474197 | -4.548724 | 0.226166  | H     | -4.460118 | -4.848273 | -1.603076 |
| H     | -4.909948 | -3.407301 | 1.445058  | H     | -4.380893 | -3.382115 | -2.594226 |
| C     | 0.462871  | -0.769864 | 0.888536  | C     | 0.481086  | -0.770342 | 0.897583  |
| N     | -0.031106 | -1.286301 | 1.808653  | N     | 0.008945  | -1.289581 | 1.828418  |
| ***** |           |           |           | ***** |           |           |           |

| 1-A-11-D-P1234-t3-DCM |           |           |           | 1-A-11-D-P1234-t3-DMSO |           |           |           |
|-----------------------|-----------|-----------|-----------|------------------------|-----------|-----------|-----------|
| C                     | -3.566607 | -1.876343 | -0.334156 | C                      | -3.515410 | -1.955243 | -0.418745 |
| C                     | -2.559338 | -1.443615 | -1.246604 | C                      | -2.493910 | -1.543666 | -1.282878 |
| H                     | -2.322139 | -2.039851 | -2.116213 | H                      | -2.201981 | -2.151746 | -2.126814 |
| C                     | -3.904963 | -0.985730 | 0.690960  | C                      | -3.899989 | -1.041957 | 0.633730  |
| H                     | -4.729064 | -1.196651 | 1.358166  | H                      | -4.719330 | -1.291284 | 1.293353  |
| C                     | -1.859360 | -0.260035 | -1.055678 | C                      | -1.830803 | -0.326633 | -1.071662 |
| H                     | -1.118195 | 0.014353  | -1.793616 | H                      | -1.067240 | -0.042496 | -1.782279 |
| C                     | -3.225920 | 0.248429  | 0.865530  | C                      | -3.249646 | 0.188133  | 0.829019  |
| C                     | -2.100858 | 0.585168  | 0.033688  | C                      | -2.125089 | 0.540643  | 0.008044  |
| C                     | -3.701791 | 1.208088  | 1.778267  | C                      | -3.740059 | 1.108789  | 1.802038  |
| H                     | -4.549792 | 0.975368  | 2.411685  | H                      | -4.588436 | 0.824630  | 2.414179  |
| C                     | -3.146566 | 2.499534  | 1.798281  | C                      | -3.235115 | 2.417924  | 1.853095  |
| H                     | -3.584411 | 3.255826  | 2.440753  | H                      | -3.726699 | 3.167298  | 2.463882  |
| C                     | -2.027603 | 2.845177  | 1.018629  | C                      | -2.138293 | 2.784381  | 1.075931  |
| C                     | -1.365236 | 1.826116  | 0.253669  | C                      | -1.427455 | 1.771630  | 0.279339  |
| C                     | -1.541887 | 4.189200  | 0.986549  | C                      | -1.721131 | 4.146749  | 0.981001  |
| H                     | -2.071740 | 4.950612  | 1.547387  | H                      | -2.273922 | 4.896817  | 1.536992  |
| C                     | -0.471774 | 4.517250  | 0.185414  | C                      | -0.683777 | 4.509150  | 0.174370  |
| H                     | -0.171546 | 5.552880  | 0.067989  | H                      | -0.416382 | 5.553538  | 0.056789  |
| C                     | 0.270231  | 3.516396  | -0.473127 | C                      | 0.135820  | 3.516838  | -0.474009 |
| C                     | -0.085249 | 2.119244  | -0.292542 | C                      | -0.156682 | 2.144158  | -0.292390 |
| C                     | 1.354017  | 3.869646  | -1.344004 | C                      | 1.227567  | 3.946027  | -1.301271 |
| H                     | 1.534165  | 4.924171  | -1.524838 | H                      | 1.334399  | 5.011310  | -1.477150 |
| C                     | 2.130221  | 2.928067  | -1.945566 | C                      | 2.081069  | 3.066102  | -1.895333 |
| H                     | 2.924771  | 3.209381  | -2.626838 | H                      | 2.862799  | 3.397422  | -2.567979 |
| C                     | 1.987152  | 1.539748  | -1.574732 | C                      | 1.997797  | 1.681806  | -1.531606 |
| C                     | 0.930989  | 1.143365  | -0.667317 | C                      | 0.917458  | 1.224937  | -0.643091 |
| C                     | 2.864123  | 0.512147  | -1.917262 | C                      | 2.938295  | 0.717520  | -1.822468 |
| H                     | 3.702949  | 0.633647  | -2.589725 | H                      | 3.799624  | 0.874728  | -2.457876 |
| C                     | 1.121078  | -0.174842 | -0.191606 | C                      | 1.156079  | -0.066545 | -0.163360 |
| P                     | 2.396877  | -1.053630 | -1.176998 | P                      | 2.475596  | -0.856355 | -1.130712 |
| C                     | 3.762181  | -1.456362 | 0.017409  | C                      | 3.818611  | -1.375945 | 0.019083  |
| C                     | 4.324443  | -0.498525 | 0.872883  | C                      | 4.393134  | -0.491483 | 0.943769  |
| C                     | 4.237782  | -2.771308 | 0.055119  | C                      | 4.266170  | -2.700389 | -0.040431 |
| C                     | 5.344519  | -0.854744 | 1.750511  | C                      | 5.402218  | -0.932281 | 1.794912  |
| H                     | 3.961467  | 0.522999  | 0.853250  | H                      | 4.051113  | 0.535533  | 0.998109  |
| C                     | 5.262463  | -3.127161 | 0.934625  | C                      | 5.279564  | -3.137814 | 0.814488  |

|       |           |           |           |       |           |           |           |
|-------|-----------|-----------|-----------|-------|-----------|-----------|-----------|
| H     | 3.806908  | -3.519078 | -0.602063 | H     | 3.825732  | -3.389748 | -0.751837 |
| C     | 5.815870  | -2.169904 | 1.781843  | C     | 5.846969  | -2.255416 | 1.730730  |
| H     | 5.772879  | -0.108666 | 2.410675  | H     | 5.842639  | -0.244667 | 2.508002  |
| H     | 5.623438  | -4.149263 | 0.957196  | H     | 5.620948  | -4.165237 | 0.762727  |
| H     | 6.610572  | -2.444522 | 2.466355  | H     | 6.633417  | -2.594592 | 2.395254  |
| N     | -4.179831 | -3.101724 | -0.483318 | N     | -4.154117 | -3.159033 | -0.543245 |
| C     | -3.995192 | -3.874257 | -1.707278 | C     | -5.314173 | -3.501262 | 0.279640  |
| H     | -2.937737 | -4.080011 | -1.887646 | H     | -6.161632 | -2.836496 | 0.082584  |
| H     | -4.500242 | -4.831795 | -1.595262 | H     | -5.617997 | -4.518930 | 0.047181  |
| H     | -4.408375 | -3.368445 | -2.590161 | H     | -5.072433 | -3.457657 | 1.343717  |
| C     | -5.311074 | -3.439706 | 0.368954  | C     | -3.788325 | -4.057418 | -1.631804 |
| H     | -6.183774 | -2.798401 | 0.181476  | H     | -2.713666 | -4.257248 | -1.621188 |
| H     | -5.597919 | -4.473353 | 0.184815  | H     | -4.314434 | -5.001001 | -1.510226 |
| H     | -5.040210 | -3.350934 | 1.424086  | H     | -4.050591 | -3.633727 | -2.608661 |
| C     | 0.499802  | -0.779712 | 0.896892  | C     | 0.530981  | -0.749302 | 0.886660  |
| N     | 0.047850  | -1.310535 | 1.832090  | N     | 0.123960  | -1.356354 | 1.791973  |
| ***** |           |           |           | ***** |           |           |           |

|                            |           |           |           |                   |           |           |           |
|----------------------------|-----------|-----------|-----------|-------------------|-----------|-----------|-----------|
| 1-A-11-D-P1234-t3-n-hexane |           |           |           | 3-A-10-D-P1234-t3 |           |           |           |
| C                          | -3.546208 | -1.886089 | -0.337982 | C                 | -3.363670 | -2.065592 | -1.583226 |
| C                          | -2.546426 | -1.441805 | -1.253785 | C                 | -2.211841 | -1.463253 | -2.104579 |
| H                          | -2.301922 | -2.037955 | -2.121522 | C                 | -4.024615 | -1.485763 | -0.509502 |
| C                          | -3.891439 | -1.002779 | 0.685866  | C                 | -1.659279 | -0.342048 | -1.513756 |
| H                          | -4.708826 | -1.224575 | 1.357863  | H                 | -0.796576 | 0.118757  | -1.967235 |
| C                          | -1.856569 | -0.252400 | -1.063870 | C                 | -3.440277 | -0.337149 | 0.153114  |
| H                          | -1.117022 | 0.030015  | -1.800114 | C                 | -2.200602 | 0.207835  | -0.332679 |
| C                          | -3.223906 | 0.237909  | 0.860882  | C                 | -4.067710 | 0.266331  | 1.268834  |
| C                          | -2.101435 | 0.584429  | 0.029227  | H                 | -4.925822 | -0.203529 | 1.727757  |
| C                          | -3.707344 | 1.195864  | 1.768829  | C                 | -3.607965 | 1.472581  | 1.739540  |
| H                          | -4.553006 | 0.958291  | 2.403739  | H                 | -4.148111 | 1.986988  | 2.527823  |
| C                          | -3.161079 | 2.489011  | 1.786131  | C                 | -2.419846 | 2.071228  | 1.239856  |
| H                          | -3.602512 | 3.242466  | 2.430020  | C                 | -1.595647 | 1.351432  | 0.334665  |
| C                          | -2.041452 | 2.844524  | 1.008632  | C                 | -2.060187 | 3.384953  | 1.651235  |
| C                          | -1.371040 | 1.830287  | 0.251163  | H                 | -2.717247 | 3.924821  | 2.323998  |
| C                          | -1.562907 | 4.189769  | 0.979112  | C                 | -0.925356 | 3.975844  | 1.147735  |
| H                          | -2.097712 | 4.949359  | 1.537938  | H                 | -0.693196 | 5.008456  | 1.385405  |
| C                          | -0.491122 | 4.520574  | 0.182872  | C                 | -0.004241 | 3.232487  | 0.382641  |
| H                          | -0.193669 | 5.557305  | 0.066454  | C                 | -0.261527 | 1.850511  | 0.087961  |
| C                          | 0.258715  | 3.522979  | -0.471765 | C                 | 1.222341  | 3.857169  | -0.036815 |
| C                          | -0.090190 | 2.125850  | -0.291104 | H                 | 1.338304  | 4.920444  | 0.141687  |
| C                          | 1.346002  | 3.877851  | -1.336207 | C                 | 2.222241  | 3.141677  | -0.630554 |
| H                          | 1.526589  | 4.932564  | -1.515903 | H                 | 3.138557  | 3.622565  | -0.952624 |
| C                          | 2.126064  | 2.936406  | -1.933690 | C                 | 2.096932  | 1.733497  | -0.760753 |
| H                          | 2.924053  | 3.220566  | -2.610148 | C                 | 0.879502  | 1.050315  | -0.311048 |
| C                          | 1.984293  | 1.547392  | -1.568368 | C                 | 3.117157  | 0.858652  | -1.205178 |
| C                          | 0.927703  | 1.150269  | -0.663136 | H                 | -3.784850 | -2.928247 | -2.082206 |
| C                          | 2.859473  | 0.518502  | -1.911261 | C                 | 1.031329  | -0.329944 | -0.243504 |
| H                          | 3.699775  | 0.638968  | -2.582025 | P                 | 2.584112  | -0.835835 | -0.951681 |
| C                          | 1.113889  | -0.169046 | -0.187592 | C                 | 3.647670  | -1.682359 | 0.293877  |
| P                          | 2.388428  | -1.047711 | -1.171519 | C                 | 3.130495  | -2.108376 | 1.524424  |
| C                          | 3.755539  | -1.449813 | 0.022839  | C                 | 4.985002  | -1.958120 | -0.027525 |
| C                          | 4.298384  | -0.498959 | 0.897297  | C                 | 3.948153  | -2.782706 | 2.428158  |
| C                          | 4.253511  | -2.756233 | 0.038632  | H                 | 2.100353  | -1.890326 | 1.781198  |
| C                          | 5.321808  | -0.853265 | 1.770998  | C                 | 5.800011  | -2.618828 | 0.885872  |
| H                          | 3.915166  | 0.515284  | 0.895659  | H                 | 5.392873  | -1.642754 | -0.981866 |

|       |           |           |           |       |           |           |           |
|-------|-----------|-----------|-----------|-------|-----------|-----------|-----------|
| C     | 5.282106  | -3.110305 | 0.913577  | C     | 5.282552  | -3.037179 | 2.112730  |
| H     | 3.834594  | -3.498778 | -0.632221 | H     | 3.545100  | -3.101411 | 3.383263  |
| C     | 5.816369  | -2.159683 | 1.779445  | H     | 6.838214  | -2.810214 | 0.639202  |
| H     | 5.733813  | -0.112560 | 2.447603  | H     | 5.917434  | -3.559581 | 2.819494  |
| H     | 5.660024  | -4.126656 | 0.919450  | H     | 0.270561  | -1.031439 | 0.054351  |
| H     | 6.613324  | -2.433168 | 2.461993  | C     | 4.367335  | 1.241431  | -1.695267 |
| N     | -4.142579 | -3.122694 | -0.487193 | N     | 5.413601  | 1.542475  | -2.107831 |
| C     | -3.960233 | -3.887019 | -1.714381 | H     | -1.769087 | -1.862179 | -3.010101 |
| H     | -2.902393 | -4.085808 | -1.902652 | N     | -5.247476 | -2.001848 | -0.044155 |
| H     | -4.457239 | -4.849376 | -1.604304 | C     | -5.526017 | -3.411546 | -0.273480 |
| H     | -4.382631 | -3.381997 | -2.594049 | H     | -6.333805 | -3.719223 | 0.395008  |
| C     | -5.244969 | -3.487613 | 0.387526  | H     | -5.848402 | -3.622567 | -1.305227 |
| H     | -6.137605 | -2.866205 | 0.223620  | H     | -4.643055 | -4.009773 | -0.049560 |
| H     | -5.513286 | -4.527508 | 0.208316  | C     | -6.447584 | -1.168712 | -0.168413 |
| H     | -4.950678 | -3.395071 | 1.436376  | H     | -6.935758 | -1.343875 | -1.138950 |
| C     | 0.478770  | -0.769501 | 0.897658  | H     | -7.159696 | -1.416144 | 0.623587  |
| N     | 0.003562  | -1.287610 | 1.827394  | H     | -6.196479 | -0.113826 | -0.102061 |
| ***** |           |           |           | ***** |           |           |           |

| 3-A-10-D-P1234-t3-CCl4 |           |           |           | 3-A-10-D-P1234-t3-DCM |           |           |           |
|------------------------|-----------|-----------|-----------|-----------------------|-----------|-----------|-----------|
| C                      | -3.360780 | -2.055813 | -1.598942 | C                     | -3.358049 | -2.052737 | -1.607615 |
| C                      | -2.211040 | -1.449883 | -2.122097 | C                     | -2.209015 | -1.445007 | -2.131767 |
| C                      | -4.018131 | -1.482946 | -0.519130 | C                     | -4.013608 | -1.484404 | -0.524196 |
| C                      | -1.655124 | -0.333204 | -1.528145 | C                     | -1.651237 | -0.330665 | -1.536765 |
| H                      | -0.794568 | 0.129875  | -1.983616 | H                     | -0.791373 | 0.132992  | -1.993290 |
| C                      | -3.431046 | -0.337284 | 0.145381  | C                     | -3.424930 | -0.339991 | 0.140769  |
| C                      | -2.194183 | 0.210978  | -0.341985 | C                     | -2.190232 | 0.211098  | -0.348425 |
| C                      | -4.056539 | 0.259822  | 1.268804  | C                     | -4.049525 | 0.253149  | 1.269174  |
| H                      | -4.914565 | -0.213224 | 1.724329  | H                     | -4.907271 | -0.221957 | 1.722845  |
| C                      | -3.600150 | 1.461171  | 1.745578  | C                     | -3.597368 | 1.452544  | 1.749014  |
| H                      | -4.138606 | 1.970661  | 2.537833  | H                     | -4.135682 | 1.959087  | 2.542878  |
| C                      | -2.412229 | 2.064214  | 1.243753  | C                     | -2.410683 | 2.059623  | 1.244376  |
| C                      | -1.591241 | 1.352206  | 0.330243  | C                     | -1.590564 | 1.352573  | 0.325878  |
| C                      | -2.056010 | 3.376226  | 1.659576  | C                     | -2.059365 | 3.371847  | 1.660531  |
| H                      | -2.712728 | 3.910298  | 2.337229  | H                     | -2.717116 | 3.902243  | 2.339868  |
| C                      | -0.924656 | 3.975356  | 1.156682  | C                     | -0.931103 | 3.978099  | 1.157462  |
| H                      | -0.695910 | 5.007272  | 1.399985  | H                     | -0.707187 | 5.010485  | 1.402452  |
| C                      | -0.002578 | 3.237112  | 0.387045  | C                     | -0.006695 | 3.243185  | 0.386978  |
| C                      | -0.258344 | 1.858982  | 0.082145  | C                     | -0.259470 | 1.866596  | 0.076883  |
| C                      | 1.225439  | 3.865694  | -0.022419 | C                     | 1.221378  | 3.875400  | -0.015702 |
| H                      | 1.339558  | 4.927927  | 0.162767  | H                     | 1.332548  | 4.937332  | 0.172311  |
| C                      | 2.230668  | 3.153892  | -0.616145 | C                     | 2.232221  | 3.166164  | -0.607862 |
| H                      | 3.147547  | 3.640256  | -0.928274 | H                     | 3.148614  | 3.657998  | -0.913031 |
| C                      | 2.105112  | 1.749714  | -0.758553 | C                     | 2.108620  | 1.764896  | -0.755979 |
| C                      | 0.883929  | 1.063753  | -0.320813 | C                     | 0.885547  | 1.076042  | -0.326399 |
| C                      | 3.128428  | 0.873280  | -1.205190 | C                     | 3.136206  | 0.886192  | -1.200692 |
| H                      | -3.782791 | -2.916631 | -2.100077 | H                     | -3.779849 | -2.912838 | -2.109840 |
| C                      | 1.035321  | -0.318079 | -0.260485 | C                     | 1.038867  | -0.306685 | -0.266848 |
| P                      | 2.593222  | -0.820757 | -0.949644 | P                     | 2.598791  | -0.807811 | -0.943395 |
| C                      | 3.635788  | -1.691998 | 0.295946  | C                     | 3.630268  | -1.697854 | 0.296609  |
| C                      | 3.121166  | -2.057009 | 1.547538  | C                     | 3.122383  | -2.028301 | 1.561032  |
| C                      | 4.951118  | -2.043571 | -0.042295 | C                     | 4.928714  | -2.095791 | -0.056402 |
| C                      | 3.923101  | -2.743915 | 2.456099  | C                     | 3.917497  | -2.724678 | 2.468712  |
| H                      | 2.106725  | -1.784654 | 1.814495  | H                     | 2.118976  | -1.726191 | 1.837176  |
| C                      | 5.751201  | -2.717121 | 0.875403  | C                     | 5.722017  | -2.779652 | 0.860103  |

|       |           |           |           |       |           |           |           |
|-------|-----------|-----------|-----------|-------|-----------|-----------|-----------|
| H     | 5.352684  | -1.782887 | -1.015611 | H     | 5.320885  | -1.868739 | -1.041899 |
| C     | 5.237681  | -3.072340 | 2.123962  | C     | 5.216818  | -3.097947 | 2.122319  |
| H     | 3.523585  | -3.015612 | 3.426926  | H     | 3.524182  | -2.970657 | 3.448695  |
| H     | 6.772839  | -2.969421 | 0.615154  | H     | 6.730047  | -3.070861 | 0.588048  |
| H     | 5.859834  | -3.604821 | 2.834369  | H     | 5.832678  | -3.638853 | 2.831651  |
| H     | 0.274785  | -1.021876 | 0.032086  | H     | 0.279745  | -1.012164 | 0.025194  |
| C     | 4.375095  | 1.258796  | -1.694033 | C     | 4.380896  | 1.273558  | -1.684391 |
| N     | 5.418980  | 1.568800  | -2.110087 | N     | 5.425724  | 1.589728  | -2.097948 |
| H     | -1.773525 | -1.843981 | -3.032337 | H     | -1.774630 | -1.837633 | -3.044236 |
| N     | -5.234727 | -2.005251 | -0.047859 | N     | -5.225178 | -2.011471 | -0.047806 |
| C     | -6.440243 | -1.176001 | -0.156753 | C     | -6.434848 | -1.185056 | -0.146186 |
| H     | -6.935438 | -1.350739 | -1.123174 | H     | -6.933609 | -1.358525 | -1.110511 |
| H     | -7.142799 | -1.430446 | 0.640909  | H     | -7.131092 | -1.446259 | 0.654269  |
| H     | -6.194278 | -0.119995 | -0.089606 | H     | -6.193386 | -0.128235 | -0.075962 |
| C     | -5.509668 | -3.415957 | -0.282927 | C     | -5.498658 | -3.422227 | -0.290982 |
| H     | -6.312753 | -3.728637 | 0.388377  | H     | -6.300036 | -3.738749 | 0.380082  |
| H     | -5.836799 | -3.621067 | -1.313740 | H     | -5.827493 | -3.620132 | -1.322099 |
| H     | -4.623399 | -4.012235 | -0.067197 | H     | -4.611137 | -4.018818 | -0.081184 |
| ***** |           |           |           | ***** |           |           |           |

|                        |           |           |           |                            |           |           |           |
|------------------------|-----------|-----------|-----------|----------------------------|-----------|-----------|-----------|
| 3-A-10-D-P1234-t3-DMSO |           |           |           | 3-A-10-D-P1234-t3-n-hexane |           |           |           |
| C                      | -3.357208 | -2.053652 | -1.608725 | C                          | -3.360787 | -2.058149 | -1.595829 |
| C                      | -2.207994 | -1.445934 | -2.132996 | C                          | -2.210862 | -1.452683 | -2.118915 |
| C                      | -4.012683 | -1.486103 | -0.524766 | C                          | -4.018854 | -1.483912 | -0.517248 |
| C                      | -1.649866 | -0.331868 | -1.538247 | C                          | -1.655740 | -0.334997 | -1.525805 |
| H                      | -0.789771 | 0.131356  | -1.994908 | H                          | -0.794947 | 0.127783  | -1.981082 |
| C                      | -3.423701 | -0.341658 | 0.139860  | C                          | -3.432543 | -0.337364 | 0.146551  |
| C                      | -2.189529 | 0.210127  | -0.349977 | C                          | -2.195261 | 0.210376  | -0.340622 |
| C                      | -4.048282 | 0.250841  | 1.269356  | C                          | -4.058571 | 0.261131  | 1.268399  |
| H                      | -4.905955 | -0.224635 | 1.722691  | H                          | -4.916614 | -0.211334 | 1.724543  |
| C                      | -3.597851 | 1.450147  | 1.749484  | C                          | -3.601763 | 1.463435  | 1.743820  |
| H                      | -4.136373 | 1.956174  | 2.543405  | H                          | -4.140615 | 1.973928  | 2.535229  |
| C                      | -2.411786 | 2.058497  | 1.243560  | C                          | -2.413729 | 2.065669  | 1.242370  |
| C                      | -1.591419 | 1.352413  | 0.324243  | C                          | -1.592109 | 1.352183  | 0.330526  |
| C                      | -2.062768 | 3.371425  | 1.658467  | C                          | -2.056977 | 3.378027  | 1.657212  |
| H                      | -2.721409 | 3.901173  | 2.337334  | H                          | -2.713802 | 3.913227  | 2.333893  |
| C                      | -0.935588 | 3.979948  | 1.155041  | C                          | -0.924945 | 3.975657  | 1.154225  |
| H                      | -0.713843 | 5.012873  | 1.399387  | H                          | -0.695622 | 5.007725  | 1.396471  |
| C                      | -0.009845 | 3.245637  | 0.385441  | C                          | -0.002975 | 3.236445  | 0.385574  |
| C                      | -0.261048 | 1.869005  | 0.074940  | C                          | -0.258968 | 1.857641  | 0.082622  |
| C                      | 1.217941  | 3.879129  | -0.015456 | C                          | 1.224931  | 3.864289  | -0.025490 |
| H                      | 1.327690  | 4.941177  | 0.172462  | H                          | 1.339365  | 4.926728  | 0.158432  |
| C                      | 2.230998  | 3.170492  | -0.606445 | C                          | 2.229304  | 3.151775  | -0.618962 |
| H                      | 3.146883  | 3.664390  | -0.909976 | H                          | 3.146164  | 3.637104  | -0.932725 |
| C                      | 2.108685  | 1.769998  | -0.754924 | C                          | 2.103707  | 1.746903  | -0.759265 |
| C                      | 0.885341  | 1.080048  | -0.327349 | C                          | 0.883086  | 1.061490  | -0.319406 |
| C                      | 3.138104  | 0.890331  | -1.198019 | C                          | 3.126410  | 0.870715  | -1.205509 |
| H                      | -3.778698 | -2.913832 | -2.110945 | H                          | -3.782453 | -2.919568 | -2.096281 |
| C                      | 1.039911  | -0.302896 | -0.266498 | C                          | 1.034580  | -0.320038 | -0.257660 |
| P                      | 2.599840  | -0.803801 | -0.940062 | P                          | 2.591590  | -0.823358 | -0.950083 |
| C                      | 3.630199  | -1.698981 | 0.296438  | C                          | 3.637494  | -1.690366 | 0.295955  |
| C                      | 3.125918  | -2.022140 | 1.564394  | C                          | 3.124509  | -2.058064 | 1.547310  |
| C                      | 4.923957  | -2.107597 | -0.062248 | C                          | 4.954373  | -2.036001 | -0.042106 |
| C                      | 3.921138  | -2.720659 | 2.470494  | C                          | 3.929120  | -2.742211 | 2.455555  |
| H                      | 2.125136  | -1.714796 | 1.844127  | H                          | 2.109123  | -1.789404 | 1.814482  |

|       |           |           |           |       |           |           |           |
|-------|-----------|-----------|-----------|-------|-----------|-----------|-----------|
| C     | 5.717228  | -2.793986 | 0.852604  | C     | 5.757146  | -2.706622 | 0.875308  |
| H     | 5.311738  | -1.889079 | -1.051396 | H     | 5.355235  | -1.772052 | -1.014841 |
| C     | 5.216293  | -3.103868 | 2.118758  | C     | 5.245025  | -3.064947 | 2.123478  |
| H     | 3.530813  | -2.961558 | 3.452855  | H     | 3.530665  | -3.015975 | 3.426273  |
| H     | 6.721139  | -3.094826 | 0.575951  | H     | 6.780055  | -2.953917 | 0.615171  |
| H     | 5.831728  | -3.647087 | 2.826611  | H     | 5.869378  | -3.595155 | 2.833689  |
| H     | 0.281520  | -1.008933 | 0.026058  | H     | 0.273960  | -1.023453 | 0.035688  |
| C     | 4.382457  | 1.278375  | -1.678719 | C     | 4.373710  | 1.255775  | -1.694704 |
| N     | 5.428265  | 1.597031  | -2.089645 | N     | 5.417835  | 1.564344  | -2.110404 |
| H     | -1.774074 | -1.839116 | -3.045487 | H     | -1.772406 | -1.847703 | -3.028287 |
| N     | -5.222696 | -2.014569 | -0.046827 | N     | -5.236334 | -2.005381 | -0.046716 |
| C     | -6.433690 | -1.188963 | -0.141925 | C     | -6.441251 | -1.176008 | -0.158749 |
| H     | -6.933360 | -1.361981 | -1.105698 | H     | -6.935047 | -1.351420 | -1.125871 |
| H     | -7.128053 | -1.452446 | 0.659248  | H     | -7.145464 | -1.429183 | 0.637966  |
| H     | -6.193700 | -0.131910 | -0.070319 | H     | -6.194822 | -0.120065 | -0.092215 |
| C     | -5.496094 | -3.425112 | -0.293630 | C     | -5.511214 | -3.416193 | -0.279885 |
| H     | -6.296965 | -3.743102 | 0.377168  | H     | -6.314793 | -3.728069 | 0.391293  |
| H     | -5.825610 | -3.619796 | -1.324948 | H     | -5.837645 | -3.623102 | -1.310676 |
| H     | -4.608327 | -4.022243 | -0.086317 | H     | -4.625143 | -4.012193 | -0.062571 |
| ***** |           |           |           | ***** |           |           |           |

|                   |           |           |           |                        |           |           |           |
|-------------------|-----------|-----------|-----------|------------------------|-----------|-----------|-----------|
| 1-D-13-A-1P234-t5 |           |           |           | 1-D-13-A-1P234-t4-CCl4 |           |           |           |
| C                 | 5.173916  | 0.634314  | -0.243561 | C                      | -5.170389 | -0.634654 | -0.229641 |
| C                 | 4.161189  | 1.233583  | -0.962773 | C                      | -4.157891 | -1.235923 | -0.947345 |
| H                 | 4.319380  | 2.166746  | -1.487615 | H                      | -4.315039 | -2.174351 | -1.463033 |
| C                 | 4.988246  | -0.633906 | 0.332550  | C                      | -4.986854 | 0.638545  | 0.337518  |
| H                 | 5.807535  | -1.126074 | 0.843960  | H                      | -5.806031 | 1.131946  | 0.847719  |
| C                 | 2.882607  | 0.582848  | -1.077750 | C                      | -2.881865 | -0.580674 | -1.070703 |
| C                 | 3.731514  | -1.306854 | 0.241258  | C                      | -3.729897 | 1.311143  | 0.243894  |
| C                 | 2.615530  | -0.625261 | -0.342823 | C                      | -2.613583 | 0.629741  | -0.337650 |
| C                 | 3.572013  | -2.645991 | 0.665858  | C                      | -3.570766 | 2.651742  | 0.666052  |
| H                 | 4.430246  | -3.164471 | 1.079340  | H                      | -4.428971 | 3.170929  | 1.078568  |
| C                 | 2.386795  | -3.337519 | 0.433589  | C                      | -2.384952 | 3.341602  | 0.435210  |
| H                 | 2.333463  | -4.404857 | 0.618380  | H                      | -2.330559 | 4.408724  | 0.621184  |
| C                 | 1.250796  | -2.669913 | -0.052181 | C                      | -1.248192 | 2.673027  | -0.048810 |
| C                 | 1.321044  | -1.237702 | -0.241908 | C                      | -1.319620 | 1.241456  | -0.239562 |
| C                 | 0.041190  | -3.346945 | -0.410830 | C                      | -0.037405 | 3.351074  | -0.402801 |
| H                 | 0.017760  | -4.429310 | -0.344570 | H                      | -0.012545 | 4.433039  | -0.331216 |
| C                 | -1.044893 | -2.655951 | -0.893720 | C                      | 1.048163  | 2.659847  | -0.886719 |
| H                 | -1.917468 | -3.194688 | -1.247078 | H                      | 1.922266  | 3.198226  | -1.236724 |
| C                 | -1.059366 | -1.242856 | -0.848344 | C                      | 1.059377  | 1.246092  | -0.846756 |
| C                 | 0.067482  | -0.539233 | -0.375498 | C                      | -0.067419 | 0.541092  | -0.375102 |
| C                 | -1.425194 | 1.289926  | -0.693494 | C                      | 1.420020  | -1.289684 | -0.706163 |
| H                 | 6.136532  | 1.126360  | -0.157930 | H                      | -6.130823 | -1.129470 | -0.137320 |
| C                 | -3.789163 | -0.302561 | -0.314900 | C                      | 3.788453  | 0.301178  | -0.312745 |
| C                 | -4.791438 | -0.824946 | 1.830070  | C                      | 4.784543  | 0.796129  | 1.841897  |
| C                 | -5.065106 | -0.041374 | -0.827077 | C                      | 5.066974  | 0.060639  | -0.829170 |
| C                 | -6.058862 | -0.549036 | 1.313808  | C                      | 6.055172  | 0.542342  | 1.320994  |
| C                 | -6.194338 | -0.156701 | -0.015347 | C                      | 6.195068  | 0.173973  | -0.014949 |
| H                 | -5.175902 | 0.248040  | -1.867073 | H                      | 5.181549  | -0.212063 | -1.873184 |
| H                 | -7.176810 | 0.050807  | -0.424861 | H                      | 7.179548  | -0.017138 | -0.427468 |
| P                 | -2.341761 | -0.109501 | -1.471325 | P                      | 2.342148  | 0.113338  | -1.470546 |
| C                 | -0.228508 | 0.851319  | -0.071360 | C                      | 0.225165  | -0.851519 | -0.078209 |
| C                 | 0.470281  | 1.768087  | 0.789028  | C                      | -0.472564 | -1.772128 | 0.780465  |
| C                 | 0.144711  | 3.139808  | 0.680546  | C                      | -0.153260 | -3.145305 | 0.656369  |

|       |           |           |           |       |           |           |           |
|-------|-----------|-----------|-----------|-------|-----------|-----------|-----------|
| C     | -0.932299 | 3.562318  | -0.081112 | C     | 0.920501  | -3.565171 | -0.111457 |
| C     | -1.759072 | 2.631266  | -0.732673 | C     | 1.750785  | -2.631608 | -0.756298 |
| H     | 0.689435  | 3.866712  | 1.267392  | H     | -0.698496 | -3.875614 | 1.238193  |
| H     | -1.175031 | 4.617993  | -0.118636 | H     | 1.159312  | -4.621338 | -0.157827 |
| H     | -2.641270 | 2.967923  | -1.264998 | H     | 2.632646  | -2.967136 | -1.289924 |
| C     | -3.664648 | -0.701128 | 1.022168  | C     | 3.658937  | 0.674978  | 1.031334  |
| H     | -6.935379 | -0.646293 | 1.944710  | H     | 6.930475  | 0.637492  | 1.953829  |
| H     | -4.683073 | -1.137370 | 2.863163  | H     | 4.672634  | 1.088882  | 2.880285  |
| H     | -2.683787 | -0.923005 | 1.427531  | H     | 2.676052  | 0.878407  | 1.441532  |
| N     | 1.384500  | 1.333736  | 1.731274  | N     | -1.374189 | -1.344351 | 1.734480  |
| C     | 2.337344  | 2.269264  | 2.306230  | C     | -1.092424 | -0.187250 | 2.585658  |
| H     | 3.149201  | 1.699220  | 2.760189  | H     | -1.967695 | 0.462297  | 2.655771  |
| H     | 2.760878  | 2.904558  | 1.528710  | H     | -0.832697 | -0.535331 | 3.594062  |
| H     | 1.886443  | 2.901569  | 3.085411  | H     | -0.259312 | 0.386895  | 2.193326  |
| C     | 1.103794  | 0.180831  | 2.586869  | C     | -2.314392 | -2.286330 | 2.323795  |
| H     | 1.979795  | -0.467664 | 2.659328  | H     | -3.118239 | -1.720169 | 2.795791  |
| H     | 0.840196  | 0.530373  | 3.594768  | H     | -2.749837 | -2.921120 | 1.552653  |
| H     | 0.273683  | -0.397259 | 2.193754  | H     | -1.845533 | -2.918135 | 3.091406  |
| C     | 2.010636  | 1.084278  | -2.073168 | C     | -2.020081 | -1.071540 | -2.078902 |
| N     | 1.388838  | 1.522464  | -2.951948 | N     | -1.411602 | -1.498782 | -2.973143 |
| ***** |           |           |           | ***** |           |           |           |

| 1-D-13-A-1P234-t4-DCM |           |           |           | 1-D-13-A-1P234-t4-DMSO |           |           |           |
|-----------------------|-----------|-----------|-----------|------------------------|-----------|-----------|-----------|
| C                     | -5.165307 | -0.638641 | -0.213919 | C                      | -5.162455 | -0.640822 | -0.210443 |
| C                     | -4.152900 | -1.242565 | -0.929282 | C                      | -4.150183 | -1.243967 | -0.926709 |
| H                     | -4.307769 | -2.188250 | -1.432251 | H                      | -4.303988 | -2.191529 | -1.426475 |
| C                     | -4.985202 | 0.641004  | 0.341517  | C                      | -4.984151 | 0.640258  | 0.342870  |
| H                     | -5.804229 | 1.135026  | 0.850982  | H                      | -5.802979 | 1.132699  | 0.853992  |
| C                     | -2.880353 | -0.581717 | -1.062946 | C                      | -2.879404 | -0.580305 | -1.063178 |
| C                     | -3.728841 | 1.314082  | 0.244274  | C                      | -3.728442 | 1.314355  | 0.244952  |
| C                     | -2.611913 | 0.632972  | -0.334019 | C                      | -2.611334 | 0.634534  | -0.333430 |
| C                     | -3.570542 | 2.656761  | 0.663256  | C                      | -3.570404 | 2.657244  | 0.664724  |
| H                     | -4.428441 | 3.176112  | 1.075909  | H                      | -4.427907 | 3.175820  | 1.079022  |
| C                     | -2.384847 | 3.345328  | 0.433084  | C                      | -2.384904 | 3.345876  | 0.435385  |
| H                     | -2.329651 | 4.412156  | 0.620540  | H                      | -2.329443 | 4.412230  | 0.625398  |
| C                     | -1.246945 | 2.676022  | -0.049082 | C                      | -1.246464 | 2.677096  | -0.047105 |
| C                     | -1.318886 | 1.244897  | -0.239635 | C                      | -1.318646 | 1.246385  | -0.239164 |
| C                     | -0.035471 | 3.355277  | -0.399281 | C                      | -0.034418 | 3.356780  | -0.394749 |
| H                     | -0.009367 | 4.436769  | -0.322115 | H                      | -0.007402 | 4.437958  | -0.314036 |
| C                     | 1.050107  | 2.664011  | -0.883549 | C                      | 1.051394  | 2.665664  | -0.878944 |
| H                     | 1.925802  | 3.202296  | -1.229622 | H                      | 1.928163  | 3.204176  | -1.221930 |
| C                     | 1.058865  | 1.249434  | -0.847423 | C                      | 1.059065  | 1.250671  | -0.845194 |
| C                     | -0.067518 | 0.543242  | -0.375948 | C                      | -0.067771 | 0.544064  | -0.375213 |
| C                     | 1.415602  | -1.288888 | -0.716638 | C                      | 1.413553  | -1.288997 | -0.718423 |
| H                     | -6.122554 | -1.137404 | -0.112153 | H                      | -6.118054 | -1.141852 | -0.105171 |
| C                     | 3.788835  | 0.301443  | -0.310862 | C                      | 3.790449  | 0.300343  | -0.309444 |
| C                     | 4.779094  | 0.782804  | 1.849781  | C                      | 4.780964  | 0.772031  | 1.853174  |
| C                     | 5.068779  | 0.066538  | -0.827000 | C                      | 5.070500  | 0.071270  | -0.828256 |
| C                     | 6.051636  | 0.535872  | 1.329132  | C                      | 6.053819  | 0.531696  | 1.329847  |
| C                     | 6.195204  | 0.177063  | -0.009493 | C                      | 6.197365  | 0.180575  | -0.011020 |
| H                     | 5.186897  | -0.201043 | -1.871867 | H                      | 5.188724  | -0.191389 | -1.874329 |
| H                     | 7.180787  | -0.009639 | -0.421180 | H                      | 7.183063  | -0.001524 | -0.424395 |
| P                     | 2.343395  | 0.116864  | -1.468908 | P                      | 2.344064  | 0.117700  | -1.465618 |
| C                     | 0.222075  | -0.850795 | -0.084058 | C                      | 0.219883  | -0.850741 | -0.085585 |
| C                     | -0.474997 | -1.774475 | 0.773362  | C                      | -0.478364 | -1.775498 | 0.770307  |

|       |           |           |           |       |           |           |           |
|-------|-----------|-----------|-----------|-------|-----------|-----------|-----------|
| C     | -0.162304 | -3.149412 | 0.634497  | C     | -0.168929 | -3.151228 | 0.625583  |
| C     | 0.909369  | -3.567078 | -0.137539 | C     | 0.903144  | -3.568236 | -0.146379 |
| C     | 1.743715  | -2.631508 | -0.775779 | C     | 1.740419  | -2.632088 | -0.780531 |
| H     | -0.708094 | -3.882389 | 1.212138  | H     | -0.715898 | -3.885045 | 1.200895  |
| H     | 1.145225  | -4.623585 | -0.190104 | H     | 1.137921  | -4.624893 | -0.200649 |
| H     | 2.626823  | -2.966094 | -1.308072 | H     | 2.625097  | -2.966444 | -1.310426 |
| C     | 3.654952  | 0.665077  | 1.035993  | C     | 3.656245  | 0.655858  | 1.039674  |
| H     | 6.925385  | 0.628132  | 1.964412  | H     | 6.927821  | 0.622635  | 1.964907  |
| H     | 4.664227  | 1.066942  | 2.890116  | H     | 4.666061  | 1.049528  | 2.895229  |
| H     | 2.671273  | 0.861880  | 1.447387  | H     | 2.672595  | 0.846747  | 1.453808  |
| N     | -1.363613 | -1.353736 | 1.738354  | N     | -1.362664 | -1.357411 | 1.738522  |
| C     | -2.295000 | -2.300255 | 2.338671  | C     | -2.292349 | -2.305272 | 2.341150  |
| H     | -3.092613 | -1.736133 | 2.822823  | H     | -3.087366 | -1.741403 | 2.829504  |
| H     | -2.738342 | -2.935826 | 1.572938  | H     | -2.738434 | -2.939953 | 1.576361  |
| H     | -1.812641 | -2.929931 | 3.098141  | H     | -1.806163 | -2.935227 | 3.097349  |
| C     | -1.086374 | -0.188926 | 2.581956  | C     | -1.087851 | -0.189984 | 2.580032  |
| H     | -1.960355 | 0.463379  | 2.639833  | H     | -1.962215 | 0.461989  | 2.634124  |
| H     | -0.839879 | -0.532162 | 3.594226  | H     | -0.845524 | -0.532146 | 3.593235  |
| H     | -0.245589 | 0.377655  | 2.195231  | H     | -0.245044 | 0.374986  | 2.195492  |
| C     | -2.027035 | -1.062501 | -2.081209 | C     | -2.028440 | -1.053665 | -2.086029 |
| N     | -1.427903 | -1.477872 | -2.988476 | N     | -1.430729 | -1.459197 | -2.999243 |
| ***** |           |           |           | ***** |           |           |           |

|                            |           |           |           |                   |           |           |           |
|----------------------------|-----------|-----------|-----------|-------------------|-----------|-----------|-----------|
| 1-D-13-A-1P234-t4-n-hexane |           |           |           | 3-D-13-A-1P234-t3 |           |           |           |
| C                          | 5.171187  | 0.633651  | -0.232276 | C                 | -5.376922 | 1.432711  | -0.524204 |
| C                          | 4.158720  | 1.234813  | -0.950111 | C                 | -4.362805 | 1.845885  | 0.308797  |
| H                          | 4.316235  | 2.172244  | -1.467497 | H                 | -4.380337 | 2.822981  | 0.774374  |
| C                          | 4.987042  | -0.638682 | 0.336448  | C                 | -5.384694 | 0.118861  | -1.029338 |
| H                          | 5.806218  | -1.132129 | 0.846655  | H                 | -6.213952 | -0.229762 | -1.633768 |
| C                          | 2.882081  | 0.580609  | -1.071978 | C                 | -3.274522 | 0.952608  | 0.627516  |
| C                          | 3.729948  | -1.311029 | 0.243421  | C                 | -4.305647 | -0.782849 | -0.760422 |
| C                          | 2.613793  | -0.629382 | -0.338493 | C                 | -3.155062 | -0.324921 | -0.047611 |
| C                          | 3.570479  | -2.651287 | 0.666161  | C                 | -4.380741 | -2.136318 | -1.150445 |
| H                          | 4.428648  | -3.170535 | 1.078709  | H                 | -5.266784 | -2.481401 | -1.672054 |
| C                          | 2.384590  | -3.341126 | 0.435352  | C                 | -3.391796 | -3.035836 | -0.785400 |
| H                          | 2.330113  | -4.408258 | 0.621222  | H                 | -3.518271 | -4.094623 | -0.983550 |
| C                          | 1.248079  | -2.672490 | -0.048909 | C                 | -2.208238 | -2.596799 | -0.166990 |
| C                          | 1.319660  | -1.240885 | -0.239792 | C                 | -2.012933 | -1.183541 | 0.049780  |
| C                          | 0.037304  | -3.350133 | -0.403501 | C                 | -1.205552 | -3.523036 | 0.269462  |
| H                          | 0.012454  | -4.432158 | -0.332694 | H                 | -1.402671 | -4.583813 | 0.161632  |
| C                          | -1.048201 | -2.658785 | -0.887407 | C                 | -0.038388 | -3.081808 | 0.847337  |
| H                          | -1.922168 | -3.197056 | -1.237928 | H                 | 0.683393  | -3.795083 | 1.230273  |
| C                          | -1.059627 | -1.245160 | -0.846843 | C                 | 0.257578  | -1.705856 | 0.852745  |
| C                          | 0.067354  | -0.540563 | -0.375161 | C                 | -0.666803 | -0.754926 | 0.357779  |
| C                          | -1.420800 | 1.290096  | -0.703878 | C                 | 1.283343  | 0.623775  | 0.592810  |
| H                          | 6.132161  | 1.127725  | -0.141297 | H                 | -6.192827 | 2.106468  | -0.759364 |
| C                          | -3.788601 | -0.300910 | -0.313015 | C                 | 3.110242  | -1.596072 | 0.294901  |
| C                          | -4.785728 | -0.799054 | 1.840353  | C                 | 3.935676  | -2.277506 | -1.880046 |
| C                          | -5.066843 | -0.059051 | -0.829395 | C                 | 4.347841  | -1.935496 | 0.851878  |
| C                          | -6.055994 | -0.543742 | 1.319513  | C                 | 5.169522  | -2.609360 | -1.315637 |
| C                          | -6.195228 | -0.173125 | -0.015795 | C                 | 5.374763  | -2.438224 | 0.050474  |
| H                          | -5.180769 | 0.215040  | -1.873130 | H                 | 4.507140  | -1.808715 | 1.917743  |
| H                          | -7.179500 | 0.019028  | -0.428356 | H                 | 6.328911  | -2.698549 | 0.495436  |
| P                          | -2.342115 | -0.112156 | -1.470588 | P                 | 1.801581  | -0.925265 | 1.436082  |
| C                          | -0.225562 | 0.851745  | -0.077084 | C                 | -0.048292 | 0.529402  | 0.093976  |

|       |           |           |           |       |           |           |           |
|-------|-----------|-----------|-----------|-------|-----------|-----------|-----------|
| C     | 0.472552  | 1.771664  | 0.781743  | C     | -0.527763 | 1.613838  | -0.672671 |
| C     | 0.152237  | 3.144589  | 0.660380  | C     | 0.235278  | 2.749421  | -0.855238 |
| C     | -0.922120 | 3.565017  | -0.106290 | C     | 1.526814  | 2.879288  | -0.275232 |
| C     | -1.751946 | 2.631956  | -0.752166 | C     | 2.039347  | 1.767911  | 0.441353  |
| H     | 0.697534  | 3.874296  | 1.242963  | H     | -0.168974 | 3.548400  | -1.460872 |
| H     | -1.161447 | 4.621137  | -0.151236 | H     | 3.036844  | 1.802209  | 0.858643  |
| H     | -2.633811 | 2.967762  | -1.285597 | C     | 2.913177  | -1.774787 | -1.081368 |
| C     | -3.659856 | -0.677071 | 1.030415  | H     | 5.963992  | -3.002539 | -1.940309 |
| H     | -6.931572 | -0.639581 | 1.951879  | H     | 3.771931  | -2.412929 | -2.943725 |
| H     | -4.674356 | -1.093737 | 2.878268  | H     | 1.956971  | -1.522563 | -1.526005 |
| H     | -2.677150 | -0.881926 | 1.440330  | H     | -1.497805 | 1.560275  | -1.147978 |
| N     | 1.376519  | 1.342629  | 1.733655  | N     | 2.261299  | 4.035480  | -0.420575 |
| C     | 2.318615  | 2.283607  | 2.320704  | C     | 3.608043  | 4.123369  | 0.124070  |
| H     | 3.123852  | 1.716936  | 2.789841  | H     | 4.002300  | 5.121011  | -0.059465 |
| H     | 2.752171  | 2.918505  | 1.548546  | H     | 3.611644  | 3.952822  | 1.205690  |
| H     | 1.852587  | 2.915524  | 3.090208  | H     | 4.285868  | 3.396964  | -0.340944 |
| C     | 1.094585  | 0.186515  | 2.585816  | C     | 1.740535  | 5.146618  | -1.202273 |
| H     | 1.970018  | -0.462728 | 2.657081  | H     | 0.774466  | 5.486392  | -0.815194 |
| H     | 0.833458  | 0.535047  | 3.593902  | H     | 2.437063  | 5.980824  | -1.143455 |
| H     | 0.262378  | -0.388650 | 2.193016  | H     | 1.613732  | 4.881796  | -2.259592 |
| C     | 2.018790  | 1.073297  | -2.078230 | C     | -2.486833 | 1.308305  | 1.741892  |
| N     | 1.408569  | 1.502420  | -2.970221 | N     | -1.925208 | 1.656073  | 2.699701  |
| ***** |           |           |           | ***** |           |           |           |

| 3-D-13-A-1P234-t3-CCI4 |           |           |           | 3-D-13-A-1P234-t3-DCM |           |           |           |
|------------------------|-----------|-----------|-----------|-----------------------|-----------|-----------|-----------|
| C                      | -5.377443 | 1.425634  | -0.529484 | C                     | -5.372948 | 1.432802  | -0.537865 |
| C                      | -4.365108 | 1.840638  | 0.304352  | C                     | -4.362261 | 1.847108  | 0.297981  |
| H                      | -4.383138 | 2.819654  | 0.765826  | H                     | -4.378272 | 2.828391  | 0.754601  |
| C                      | -5.383584 | 0.110478  | -1.033310 | C                     | -5.381531 | 0.116089  | -1.039691 |
| H                      | -6.211647 | -0.239536 | -1.638330 | H                     | -6.208738 | -0.232313 | -1.646490 |
| C                      | -3.276642 | 0.946673  | 0.625533  | C                     | -3.277795 | 0.949067  | 0.623479  |
| C                      | -4.302908 | -0.789095 | -0.762799 | C                     | -4.302560 | -0.784788 | -0.766563 |
| C                      | -3.153474 | -0.329841 | -0.048969 | C                     | -3.153965 | -0.327509 | -0.050549 |
| C                      | -4.376016 | -2.143341 | -1.151342 | C                     | -4.376765 | -2.139656 | -1.154879 |
| H                      | -5.261127 | -2.490547 | -1.672935 | H                     | -5.261031 | -2.486189 | -1.678005 |
| C                      | -3.385842 | -3.041836 | -0.783647 | C                     | -3.388199 | -3.039311 | -0.784374 |
| H                      | -3.511612 | -4.100827 | -0.980923 | H                     | -3.515284 | -4.098033 | -0.981895 |
| C                      | -2.203310 | -2.601227 | -0.164332 | C                     | -2.206009 | -2.600149 | -0.162890 |
| C                      | -2.009617 | -1.186629 | 0.050233  | C                     | -2.010930 | -1.185251 | 0.051568  |
| C                      | -1.199643 | -3.526290 | 0.272267  | C                     | -1.203920 | -3.526945 | 0.274410  |
| H                      | -1.394752 | -4.587393 | 0.164347  | H                     | -1.399674 | -4.587745 | 0.165225  |
| C                      | -0.032805 | -3.081905 | 0.848372  | C                     | -0.036689 | -3.083274 | 0.850371  |
| H                      | 0.690788  | -3.793373 | 1.231244  | H                     | 0.686428  | -3.795620 | 1.232566  |
| C                      | 0.260660  | -1.704576 | 0.851458  | C                     | 0.258065  | -1.705276 | 0.853346  |
| C                      | -0.664546 | -0.754899 | 0.356528  | C                     | -0.665860 | -0.753976 | 0.358666  |
| C                      | 1.282860  | 0.629005  | 0.592261  | C                     | 1.282241  | 0.629855  | 0.597938  |
| H                      | -6.192848 | 2.098801  | -0.767527 | H                     | -6.185102 | 2.107964  | -0.780665 |
| C                      | 3.114801  | -1.593052 | 0.293442  | C                     | 3.114888  | -1.596248 | 0.292618  |
| C                      | 3.943790  | -2.267516 | -1.882792 | C                     | 3.940010  | -2.272091 | -1.885125 |
| C                      | 4.348353  | -1.942850 | 0.853485  | C                     | 4.350913  | -1.941144 | 0.850723  |
| C                      | 5.173590  | -2.610593 | -1.315363 | C                     | 5.172474  | -2.610561 | -1.319851 |
| C                      | 5.375025  | -2.448017 | 0.052764  | C                     | 5.377035  | -2.444761 | 0.047854  |
| H                      | 4.506125  | -1.822051 | 1.920182  | H                     | 4.512729  | -1.817299 | 1.916362  |
| H                      | 6.326009  | -2.716119 | 0.499690  | H                     | 6.330132  | -2.708364 | 0.492668  |
| P                      | 1.804712  | -0.921176 | 1.431086  | P                     | 1.805079  | -0.924374 | 1.429007  |

|       |           |           |           |       |           |           |           |
|-------|-----------|-----------|-----------|-------|-----------|-----------|-----------|
| C     | -0.049335 | 0.532391  | 0.094608  | C     | -0.050546 | 0.534414  | 0.099965  |
| C     | -0.531382 | 1.617927  | -0.669382 | C     | -0.531302 | 1.621986  | -0.662791 |
| C     | 0.229452  | 2.755044  | -0.851989 | C     | 0.230159  | 2.758734  | -0.844577 |
| C     | 1.523623  | 2.886473  | -0.275006 | C     | 1.526047  | 2.889409  | -0.267296 |
| C     | 2.038065  | 1.773959  | 0.441040  | C     | 2.039366  | 1.774286  | 0.448108  |
| H     | -0.176390 | 3.553990  | -1.456420 | H     | -0.174057 | 3.557414  | -1.450228 |
| H     | 3.036010  | 1.810258  | 0.856847  | H     | 3.038624  | 1.808650  | 0.860771  |
| C     | 2.921356  | -1.762690 | -1.084759 | C     | 2.917979  | -1.768674 | -1.085029 |
| H     | 5.967938  | -3.005083 | -1.939251 | H     | 5.966538  | -3.003235 | -1.945065 |
| H     | 3.783217  | -2.395526 | -2.947798 | H     | 3.777305  | -2.401823 | -2.949494 |
| H     | 1.969000  | -1.501447 | -1.532509 | H     | 1.964320  | -1.510560 | -1.531976 |
| H     | -1.501535 | 1.564486  | -1.144573 | H     | -1.500561 | 1.570567  | -1.140085 |
| N     | 2.256237  | 4.039394  | -0.423596 | N     | 2.258328  | 4.038962  | -0.415690 |
| C     | 3.604183  | 4.131187  | 0.121901  | C     | 3.612022  | 4.126621  | 0.120301  |
| H     | 4.000361  | 5.124908  | -0.075179 | H     | 4.003254  | 5.123684  | -0.066991 |
| H     | 3.606773  | 3.973787  | 1.205332  | H     | 3.622106  | 3.955126  | 1.200941  |
| H     | 4.278168  | 3.397280  | -0.335200 | H     | 4.282817  | 3.399880  | -0.352044 |
| C     | 1.725868  | 5.159130  | -1.189789 | C     | 1.736720  | 5.154671  | -1.197115 |
| H     | 0.765512  | 5.496005  | -0.787103 | H     | 0.771508  | 5.492255  | -0.808482 |
| H     | 2.424728  | 5.990872  | -1.133019 | H     | 2.434554  | 5.986358  | -1.135731 |
| H     | 1.586108  | 4.901320  | -2.246486 | H     | 1.611389  | 4.888449  | -2.253066 |
| C     | -2.494380 | 1.300329  | 1.744111  | C     | -2.501604 | 1.295330  | 1.747846  |
| N     | -1.940795 | 1.645051  | 2.708044  | N     | -1.953383 | 1.630110  | 2.718906  |
| ***** |           |           |           | ***** |           |           |           |

| 3-D-13-A-1P234-t3-DMSO |           |           |           | 3-D-13-A-1P234-t3-n-hexane |           |           |           |
|------------------------|-----------|-----------|-----------|----------------------------|-----------|-----------|-----------|
| C                      | -5.371922 | 1.436840  | -0.534162 | C                          | -5.377848 | 1.425607  | -0.527915 |
| C                      | -4.361699 | 1.848418  | 0.303565  | C                          | -4.365200 | 1.840419  | 0.305703  |
| H                      | -4.376933 | 2.829148  | 0.761350  | H                          | -4.383386 | 2.818979  | 0.768151  |
| C                      | -5.381988 | 0.120994  | -1.039180 | C                          | -5.383909 | 0.110778  | -1.032227 |
| H                      | -6.209115 | -0.224517 | -1.647613 | H                          | -6.212152 | -0.239151 | -1.637101 |
| C                      | -3.279044 | 0.947842  | 0.627501  | C                          | -3.276367 | 0.946885  | 0.626095  |
| C                      | -4.303795 | -0.781330 | -0.768281 | C                          | -4.303227 | -0.788900 | -0.762231 |
| C                      | -3.155371 | -0.326743 | -0.050702 | C                          | -3.153610 | -0.329635 | -0.048680 |
| C                      | -4.378084 | -2.135473 | -1.160497 | C                          | -4.376388 | -2.142992 | -1.151057 |
| H                      | -5.261954 | -2.480456 | -1.685137 | H                          | -5.261643 | -2.490040 | -1.672556 |
| C                      | -3.389880 | -3.036261 | -0.791805 | C                          | -3.386170 | -3.041482 | -0.783940 |
| H                      | -3.517218 | -4.094339 | -0.992423 | H                          | -3.511876 | -4.100466 | -0.981352 |
| C                      | -2.207608 | -2.599038 | -0.168720 | C                          | -2.203511 | -2.600912 | -0.164885 |
| C                      | -2.012518 | -1.184676 | 0.049377  | C                          | -2.009821 | -1.186480 | 0.049982  |
| C                      | -1.205545 | -3.527009 | 0.266632  | C                          | -1.199767 | -3.525917 | 0.271597  |
| H                      | -1.400928 | -4.587530 | 0.154376  | H                          | -1.394976 | -4.587017 | 0.163756  |
| C                      | -0.038336 | -3.084512 | 0.843780  | C                          | -0.032942 | -3.081761 | 0.847900  |
| H                      | 0.684788  | -3.797941 | 1.223970  | H                          | 0.690535  | -3.793333 | 1.230795  |
| C                      | 0.256577  | -1.706133 | 0.849868  | C                          | 0.260631  | -1.704615 | 0.851257  |
| C                      | -0.667468 | -0.753653 | 0.357114  | C                          | -0.664653 | -0.754973 | 0.356342  |
| C                      | 1.280615  | 0.630162  | 0.598310  | C                          | 1.282952  | 0.628466  | 0.591574  |
| H                      | -6.182730 | 2.113595  | -0.776733 | H                          | -6.193617 | 2.098651  | -0.765165 |
| C                      | 3.116732  | -1.596454 | 0.293791  | C                          | 3.114488  | -1.592984 | 0.293702  |
| C                      | 3.945537  | -2.275881 | -1.881528 | C                          | 3.943642  | -2.268388 | -1.882085 |
| C                      | 4.354144  | -1.933585 | 0.853774  | C                          | 4.348297  | -1.941761 | 0.853728  |
| C                      | 5.179437  | -2.606633 | -1.314535 | C                          | 5.173680  | -2.610329 | -1.314657 |
| C                      | 5.382849  | -2.435118 | 0.052805  | C                          | 5.375168  | -2.446783 | 0.053271  |
| H                      | 4.515644  | -1.805008 | 1.918858  | H                          | 4.505822  | -1.820324 | 1.920406  |
| H                      | 6.337107  | -2.692328 | 0.498733  | H                          | 6.326339  | -2.714173 | 0.500266  |

|       |           |           |           |       |           |           |           |
|-------|-----------|-----------|-----------|-------|-----------|-----------|-----------|
| P     | 1.803756  | -0.925843 | 1.426160  | P     | 1.804371  | -0.921201 | 1.431604  |
| C     | -0.052763 | 0.535521  | 0.100871  | C     | -0.049170 | 0.531942  | 0.093919  |
| C     | -0.533824 | 1.624482  | -0.660151 | C     | -0.531161 | 1.617182  | -0.670411 |
| C     | 0.227908  | 2.760983  | -0.841799 | C     | 0.229820  | 2.754167  | -0.853199 |
| C     | 1.525168  | 2.890808  | -0.265610 | C     | 1.523665  | 2.885498  | -0.276113 |
| C     | 2.038377  | 1.774605  | 0.449178  | C     | 2.038054  | 1.773392  | 0.440116  |
| H     | -0.176113 | 3.559813  | -1.447284 | H     | -0.176049 | 3.553122  | -1.457638 |
| H     | 3.038629  | 1.807672  | 0.859491  | H     | 3.035861  | 1.809699  | 0.856294  |
| C     | 2.920826  | -1.774379 | -1.083397 | C     | 2.921037  | -1.763674 | -1.084314 |
| H     | 5.975598  | -2.997470 | -1.938144 | H     | 5.968165  | -3.004826 | -1.938392 |
| H     | 3.783914  | -2.409745 | -2.945497 | H     | 3.782983  | -2.397290 | -2.946986 |
| H     | 1.966353  | -1.522071 | -1.531997 | H     | 1.968358  | -1.503382 | -1.531913 |
| H     | -1.503236 | 1.574248  | -1.137264 | H     | -1.501432 | 1.563541  | -1.145322 |
| N     | 2.257555  | 4.038867  | -0.414802 | N     | 2.256556  | 4.038937  | -0.424702 |
| C     | 3.613128  | 4.125354  | 0.118151  | C     | 3.603566  | 4.131075  | 0.122251  |
| H     | 4.002009  | 5.124026  | -0.064443 | H     | 4.000381  | 5.124529  | -0.075394 |
| H     | 3.625684  | 3.947657  | 1.197546  | H     | 3.605041  | 3.974878  | 1.205957  |
| H     | 4.283299  | 3.402108  | -0.360163 | H     | 4.278210  | 3.396582  | -0.333094 |
| C     | 1.740310  | 5.151671  | -1.204603 | C     | 1.725655  | 5.158717  | -1.189828 |
| H     | 0.774282  | 5.492426  | -0.821347 | H     | 0.765629  | 5.495758  | -0.786233 |
| H     | 2.439397  | 5.982200  | -1.144945 | H     | 2.424586  | 5.990550  | -1.133627 |
| H     | 1.618760  | 4.879142  | -2.259162 | H     | 1.584722  | 4.901528  | -2.246616 |
| C     | -2.504800 | 1.285212  | 1.755557  | C     | -2.493006 | 1.301151  | 1.743796  |
| N     | -1.956891 | 1.608409  | 2.731033  | N     | -1.938054 | 1.646497  | 2.706636  |
| ***** |           |           |           | ***** |           |           |           |

|                   |           |           |           |                        |           |           |           |
|-------------------|-----------|-----------|-----------|------------------------|-----------|-----------|-----------|
| 2-D-10-A-12P34-t3 |           |           |           | 2-D-10-A-12P34-t3-CCl4 |           |           |           |
| C                 | -2.555194 | -2.671906 | 0.478767  | C                      | -2.599969 | -2.645272 | 0.480567  |
| C                 | -2.216952 | -3.948357 | -0.040390 | C                      | -2.284371 | -3.920930 | -0.055722 |
| H                 | -2.866382 | -4.796926 | 0.119188  | H                      | -2.943690 | -4.761787 | 0.102140  |
| C                 | -1.686205 | -1.570115 | 0.209962  | C                      | -1.713495 | -1.553957 | 0.220294  |
| H                 | -1.849556 | -0.626324 | 0.698506  | H                      | -1.865968 | -0.612024 | 0.716219  |
| C                 | -1.038053 | -4.122759 | -0.733915 | C                      | -1.110856 | -4.106473 | -0.755371 |
| H                 | -0.769514 | -5.111765 | -1.087746 | H                      | -0.858024 | -5.096075 | -1.118736 |
| C                 | -3.605229 | 1.615976  | -1.031594 | C                      | -3.577059 | 1.677108  | -1.008815 |
| C                 | -2.395847 | 0.911870  | -1.145326 | C                      | -2.379985 | 0.954327  | -1.123563 |
| C                 | -3.650953 | 2.877781  | -0.463738 | C                      | -3.599201 | 2.944744  | -0.451758 |
| H                 | -4.590471 | 3.407616  | -0.367766 | H                      | -4.530368 | 3.488990  | -0.354267 |
| C                 | -2.452943 | 3.520713  | -0.055701 | C                      | -2.388252 | 3.569869  | -0.053979 |
| C                 | -1.181311 | 2.848412  | -0.202329 | C                      | -1.127996 | 2.874088  | -0.197279 |
| C                 | -1.172065 | 1.489013  | -0.657890 | C                      | -1.145367 | 1.512131  | -0.645291 |
| C                 | 0.045643  | 3.510658  | 0.037059  | C                      | 0.111253  | 3.515120  | 0.035968  |
| H                 | 0.022339  | 4.544149  | 0.363299  | H                      | 0.111456  | 4.550173  | 0.358182  |
| C                 | 1.261191  | 2.900523  | -0.229581 | C                      | 1.313960  | 2.879993  | -0.231791 |
| H                 | 2.180726  | 3.470541  | -0.159989 | H                      | 2.244812  | 3.431796  | -0.165484 |
| C                 | 1.283810  | 1.547232  | -0.583179 | C                      | 1.309804  | 1.525694  | -0.583382 |
| C                 | 0.082431  | 0.815350  | -0.674473 | C                      | 0.096653  | 0.813064  | -0.666763 |
| C                 | 1.647167  | -0.897613 | -1.310122 | C                      | 1.627542  | -0.923232 | -1.315296 |
| C                 | 3.820626  | 0.232664  | 0.150205  | C                      | 3.823772  | 0.173302  | 0.150827  |
| C                 | 4.267839  | -0.186036 | 2.494864  | C                      | 4.250917  | -0.326177 | 2.483896  |
| C                 | 5.185838  | 0.083273  | -0.119546 | C                      | 5.197814  | 0.090125  | -0.102132 |
| C                 | 5.626200  | -0.347346 | 2.214606  | C                      | 5.619758  | -0.417719 | 2.220600  |
| C                 | 6.084046  | -0.213044 | 0.906775  | C                      | 6.091999  | -0.210049 | 0.927335  |
| H                 | 5.549055  | 0.207060  | -1.134469 | H                      | 5.571294  | 0.265813  | -1.105454 |
| H                 | 7.139189  | -0.326857 | 0.684048  | H                      | 7.154101  | -0.272128 | 0.717999  |

|       |           |           |           |       |           |           |           |
|-------|-----------|-----------|-----------|-------|-----------|-----------|-----------|
| P     | 2.695844  | 0.614747  | -1.277397 | P     | 2.704901  | 0.566603  | -1.277923 |
| C     | 0.333196  | -0.627587 | -0.893982 | C     | 0.318702  | -0.633649 | -0.888124 |
| C     | -0.527850 | -1.722459 | -0.595776 | C     | -0.560912 | -1.715552 | -0.591101 |
| C     | -0.141195 | -3.040823 | -0.993556 | C     | -0.198157 | -3.036394 | -1.006713 |
| C     | 1.132369  | -3.247677 | -1.562254 | C     | 1.068624  | -3.259254 | -1.586515 |
| C     | 2.033291  | -2.195979 | -1.668844 | C     | 1.989381  | -2.223501 | -1.689082 |
| H     | 1.424666  | -4.248998 | -1.858619 | H     | 1.340214  | -4.262663 | -1.894865 |
| H     | 3.039752  | -2.384831 | -2.026572 | H     | 2.989576  | -2.427523 | -2.055657 |
| C     | 3.370271  | 0.100055  | 1.470494  | C     | 3.358395  | -0.034387 | 1.456624  |
| H     | 6.323281  | -0.568495 | 3.015156  | H     | 6.312829  | -0.643961 | 3.023145  |
| H     | 3.909367  | -0.280878 | 3.514083  | H     | 3.880735  | -0.480549 | 3.491515  |
| H     | 2.318144  | 0.232094  | 1.696493  | H     | 2.298042  | 0.040134  | 1.670573  |
| H     | -2.364988 | -0.013561 | -1.700740 | H     | -2.369848 | 0.017930  | -1.660541 |
| N     | -3.676562 | -2.480067 | 1.240517  | N     | -3.715029 | -2.443636 | 1.245210  |
| C     | -4.494112 | -3.619537 | 1.640573  | C     | -4.582150 | -3.567635 | 1.587144  |
| H     | -3.884067 | -4.384430 | 2.128963  | H     | -4.017515 | -4.354991 | 2.094169  |
| H     | -5.254339 | -3.283770 | 2.341700  | H     | -5.368719 | -3.221502 | 2.252007  |
| H     | -4.993653 | -4.072050 | 0.777146  | H     | -5.045398 | -3.992221 | 0.691096  |
| C     | -4.068604 | -1.155257 | 1.724166  | C     | -4.049848 | -1.124585 | 1.785008  |
| H     | -5.124180 | -1.178149 | 1.988938  | H     | -5.071005 | -1.147954 | 2.157400  |
| H     | -3.494931 | -0.870435 | 2.613354  | H     | -3.385367 | -0.855526 | 2.612688  |
| H     | -3.925820 | -0.397453 | 0.954139  | H     | -3.981069 | -0.355800 | 1.014135  |
| C     | -2.506482 | 4.829614  | 0.467785  | C     | -2.420682 | 4.883324  | 0.456023  |
| N     | -2.551308 | 5.906737  | 0.906092  | N     | -2.453930 | 5.966591  | 0.883070  |
| H     | -4.516713 | 1.175725  | -1.422758 | H     | -4.498508 | 1.245418  | -1.385042 |
| ***** |           |           |           | ***** |           |           |           |

|                       |           |           |           |                        |           |           |           |
|-----------------------|-----------|-----------|-----------|------------------------|-----------|-----------|-----------|
| 2-D-10-A-12P34-t3-DCM |           |           |           | 2-D-10-A-12P34-t3-DMSO |           |           |           |
| C                     | -2.640983 | -2.619409 | 0.478624  | C                      | -2.653309 | -2.603604 | 0.484190  |
| C                     | -2.347963 | -3.892935 | -0.076519 | C                      | -2.357958 | -3.896279 | -0.060162 |
| H                     | -3.019999 | -4.724892 | 0.073871  | H                      | -3.031559 | -4.725363 | 0.099815  |
| C                     | -1.739609 | -1.537680 | 0.225831  | C                      | -1.764778 | -1.544468 | 0.211135  |
| H                     | -1.877069 | -0.600716 | 0.735961  | H                      | -1.934113 | -0.583257 | 0.665227  |
| C                     | -1.181180 | -4.087856 | -0.784604 | C                      | -1.204767 | -4.093079 | -0.763168 |
| H                     | -0.945573 | -5.076375 | -1.161984 | H                      | -0.971394 | -5.084811 | -1.134989 |
| C                     | -3.550153 | 1.737015  | -0.984662 | C                      | -3.544907 | 1.820585  | -0.963280 |
| C                     | -2.365104 | 0.996040  | -1.101454 | C                      | -2.350816 | 1.061543  | -1.100753 |
| C                     | -3.548998 | 3.009150  | -0.437066 | C                      | -3.515393 | 3.080812  | -0.421187 |
| H                     | -4.471885 | 3.566890  | -0.336512 | H                      | -4.422706 | 3.658073  | -0.295195 |
| C                     | -2.325410 | 3.616381  | -0.049501 | C                      | -2.260254 | 3.661824  | -0.042324 |
| C                     | -1.076895 | 2.897766  | -0.189873 | C                      | -1.015441 | 2.934234  | -0.213262 |
| C                     | -1.119978 | 1.534331  | -0.632181 | C                      | -1.093982 | 1.558843  | -0.646010 |
| C                     | 0.173751  | 3.517957  | 0.038904  | C                      | 0.235107  | 3.538184  | -0.020605 |
| H                     | 0.195862  | 4.553374  | 0.359411  | H                      | 0.285514  | 4.578673  | 0.278183  |
| C                     | 1.363964  | 2.859635  | -0.230577 | C                      | 1.420115  | 2.844556  | -0.315997 |
| H                     | 2.305144  | 3.393954  | -0.166053 | H                      | 2.367517  | 3.372036  | -0.294673 |
| C                     | 1.334317  | 1.505454  | -0.582386 | C                      | 1.365318  | 1.499683  | -0.638707 |
| C                     | 0.109906  | 0.811436  | -0.659476 | C                      | 0.116676  | 0.804325  | -0.672087 |
| C                     | 1.608135  | -0.945278 | -1.323531 | C                      | 1.583228  | -0.972119 | -1.325362 |
| C                     | 3.824594  | 0.115948  | 0.152875  | C                      | 3.804716  | 0.078385  | 0.157427  |
| C                     | 4.233070  | -0.454116 | 2.473634  | C                      | 4.155183  | -0.443604 | 2.500109  |
| C                     | 5.204332  | 0.088464  | -0.081085 | C                      | 5.187866  | 0.012776  | -0.047283 |
| C                     | 5.608758  | -0.486687 | 2.229805  | C                      | 5.534357  | -0.512412 | 2.285159  |
| C                     | 6.093104  | -0.216118 | 0.952403  | C                      | 6.049629  | -0.284538 | 1.011055  |
| H                     | 5.586869  | 0.307972  | -1.072151 | H                      | 5.594540  | 0.196207  | -1.036267 |

|       |           |           |           |       |           |           |           |
|-------|-----------|-----------|-----------|-------|-----------|-----------|-----------|
| H     | 7.159587  | -0.235270 | 0.757981  | H     | 7.119043  | -0.332742 | 0.838706  |
| P     | 2.713151  | 0.522030  | -1.277612 | P     | 2.727159  | 0.470804  | -1.307276 |
| C     | 0.304600  | -0.637655 | -0.885245 | C     | 0.297180  | -0.642650 | -0.886029 |
| C     | -0.592975 | -1.707184 | -0.591918 | C     | -0.613935 | -1.717832 | -0.589682 |
| C     | -0.253495 | -3.029210 | -1.026613 | C     | -0.273616 | -3.039608 | -1.015640 |
| C     | 1.006462  | -3.266299 | -1.617872 | C     | 0.987757  | -3.298420 | -1.609132 |
| C     | 1.945982  | -2.246237 | -1.714621 | C     | 1.921108  | -2.287821 | -1.710023 |
| H     | 1.258196  | -4.270668 | -1.939381 | H     | 1.226220  | -4.306687 | -1.927899 |
| H     | 2.939815  | -2.464017 | -2.090115 | H     | 2.915017  | -2.502459 | -2.087723 |
| C     | 3.346496  | -0.156199 | 1.442630  | C     | 3.296147  | -0.151098 | 1.443860  |
| H     | 6.296990  | -0.718646 | 3.034787  | H     | 6.201252  | -0.740205 | 3.109100  |
| H     | 3.853121  | -0.660358 | 3.468164  | H     | 3.751125  | -0.618196 | 3.491257  |
| H     | 2.280955  | -0.131197 | 1.642302  | H     | 2.227564  | -0.098815 | 1.621118  |
| H     | -2.376056 | 0.050958  | -1.622533 | H     | -2.392682 | 0.112463  | -1.614489 |
| N     | -3.745855 | -2.413030 | 1.253103  | N     | -3.763213 | -2.404382 | 1.256429  |
| C     | -4.629415 | -3.528781 | 1.585365  | C     | -4.671126 | -3.509623 | 1.559398  |
| H     | -4.069200 | -4.337470 | 2.061115  | H     | -4.142736 | -4.320631 | 2.066770  |
| H     | -5.394457 | -3.183013 | 2.274422  | H     | -5.459238 | -3.148886 | 2.213729  |
| H     | -5.117728 | -3.920780 | 0.688161  | H     | -5.129108 | -3.903880 | 0.647715  |
| C     | -4.065397 | -1.094688 | 1.802919  | C     | -4.071915 | -1.080239 | 1.784671  |
| H     | -5.077038 | -1.117361 | 2.199033  | H     | -5.022726 | -1.119040 | 2.308194  |
| H     | -3.380536 | -0.829964 | 2.614680  | H     | -3.300756 | -0.746988 | 2.485953  |
| H     | -4.012936 | -0.325582 | 1.030832  | H     | -4.143986 | -0.345263 | 0.976037  |
| C     | -2.334227 | 4.934038  | 0.446327  | C     | -2.247449 | 4.965423  | 0.483082  |
| N     | -2.349045 | 6.023769  | 0.860761  | N     | -2.243802 | 6.046813  | 0.918535  |
| H     | -4.481178 | 1.313833  | -1.345654 | H     | -4.483517 | 1.398025  | -1.302535 |
| ***** |           |           |           | ***** |           |           |           |

|                            |           |           |           |                   |           |           |           |
|----------------------------|-----------|-----------|-----------|-------------------|-----------|-----------|-----------|
| 2-D-10-A-12P34-t3-n-hexane |           |           |           | 2-D-12-A-12P34-t3 |           |           |           |
| C                          | -2.582435 | -2.657475 | 0.475997  | C                 | -2.626294 | -2.235249 | 0.539237  |
| C                          | -2.259204 | -3.931248 | -0.060222 | C                 | -2.452604 | -3.483940 | -0.112562 |
| H                          | -2.916162 | -4.774878 | 0.093435  | H                 | -3.185091 | -4.270009 | -0.001806 |
| C                          | -1.704433 | -1.560366 | 0.213016  | C                 | -1.639017 | -1.221583 | 0.355232  |
| H                          | -1.858732 | -0.620804 | 0.713024  | H                 | -1.700505 | -0.305390 | 0.913998  |
| C                          | -1.085454 | -4.109655 | -0.761188 | C                 | -1.316544 | -3.719268 | -0.858497 |
| H                          | -0.828318 | -5.097175 | -1.127246 | H                 | -1.165549 | -4.695251 | -1.305704 |
| C                          | -3.585733 | 1.659592  | -1.018006 | C                 | -3.283581 | 2.274655  | -0.424183 |
| C                          | -2.384386 | 0.943137  | -1.130500 | C                 | -2.148872 | 1.460924  | -0.709425 |
| C                          | -3.616725 | 2.924949  | -0.456560 | C                 | -3.095660 | 3.535359  | 0.190198  |
| H                          | -4.550956 | 3.464182  | -0.360792 | H                 | -3.960520 | 4.150559  | 0.410282  |
| C                          | -2.410541 | 3.555461  | -0.052206 | C                 | -1.829851 | 3.989505  | 0.476405  |
| C                          | -1.146063 | 2.867804  | -0.195149 | H                 | -1.692868 | 4.974851  | 0.907622  |
| C                          | -1.154100 | 1.507129  | -0.647269 | C                 | -0.665862 | 3.194298  | 0.200882  |
| C                          | 0.088803  | 3.515642  | 0.042512  | C                 | -0.847380 | 1.866411  | -0.320710 |
| H                          | 0.081427  | 4.549760  | 0.367599  | C                 | 0.634096  | 3.712894  | 0.369888  |
| C                          | 1.296016  | 2.888915  | -0.224826 | H                 | 0.742641  | 4.724675  | 0.747190  |
| H                          | 2.223194  | 3.446490  | -0.155461 | C                 | 1.758665  | 2.996751  | -0.024653 |
| C                          | 1.301043  | 1.535634  | -0.579904 | H                 | 2.738872  | 3.458561  | -0.005971 |
| C                          | 0.092065  | 0.816281  | -0.667768 | C                 | 1.599414  | 1.671136  | -0.446180 |
| C                          | 1.633987  | -0.909905 | -1.317484 | C                 | 0.329325  | 1.061058  | -0.474119 |
| C                          | 3.821506  | 0.193664  | 0.153077  | C                 | 1.664676  | -0.749584 | -1.318143 |
| C                          | 4.250532  | -0.295424 | 2.487918  | C                 | 4.025228  | 0.084302  | 0.062418  |
| C                          | 5.194339  | 0.099061  | -0.102395 | C                 | 4.542598  | -0.554306 | 2.342387  |
| C                          | 5.617875  | -0.399140 | 2.222005  | C                 | 5.367105  | -0.116025 | -0.280287 |
| C                          | 6.088577  | -0.202347 | 0.926522  | C                 | 5.877375  | -0.762960 | 1.988786  |

|       |           |           |           |       |           |           |           |
|-------|-----------|-----------|-----------|-------|-----------|-----------|-----------|
| H     | 5.566794  | 0.267312  | -1.107404 | C     | 6.288488  | -0.544086 | 0.676967  |
| H     | 7.149732  | -0.273369 | 0.715154  | H     | 5.693896  | 0.069424  | -1.298181 |
| P     | 2.702386  | 0.586765  | -1.275668 | H     | 7.325161  | -0.696652 | 0.397751  |
| C     | 0.323376  | -0.628557 | -0.892371 | P     | 2.864781  | 0.642250  | -1.277589 |
| C     | -0.550180 | -1.715676 | -0.597832 | C     | 0.412395  | -0.382968 | -0.793081 |
| C     | -0.178982 | -3.034183 | -1.012335 | C     | -0.539773 | -1.410074 | -0.525902 |
| C     | 1.089873  | -3.249370 | -1.590606 | C     | -0.318779 | -2.718755 | -1.059614 |
| C     | 2.004121  | -2.208165 | -1.691329 | C     | 0.897338  | -3.006444 | -1.720677 |
| H     | 1.367985  | -4.251080 | -1.898744 | C     | 1.894056  | -2.047598 | -1.800065 |
| H     | 3.006252  | -2.405863 | -2.056143 | H     | 1.061252  | -4.001924 | -2.118104 |
| C     | 3.357776  | -0.002839 | 1.461099  | H     | 2.852830  | -2.301835 | -2.239206 |
| H     | 6.311144  | -0.625926 | 3.024239  | C     | 3.622168  | -0.135399 | 1.386446  |
| H     | 3.881610  | -0.440842 | 3.497344  | H     | 6.592422  | -1.088893 | 2.735946  |
| H     | 2.298564  | 0.081642  | 1.676879  | H     | 4.220791  | -0.717342 | 3.365251  |
| H     | -2.366593 | 0.009904  | -1.672862 | H     | 2.588618  | 0.030107  | 1.669412  |
| N     | -3.695200 | -2.465269 | 1.247062  | H     | -2.288378 | 0.558233  | -1.283483 |
| C     | -4.527488 | -3.600667 | 1.633356  | N     | -3.713191 | -1.983724 | 1.332177  |
| H     | -3.921648 | -4.389247 | 2.086329  | C     | -3.857193 | -0.715129 | 2.048056  |
| H     | -5.264485 | -3.269725 | 2.360573  | H     | -3.912134 | 0.128075  | 1.355439  |
| H     | -5.054013 | -4.017187 | 0.768163  | H     | -4.775744 | -0.743272 | 2.628139  |
| C     | -4.073147 | -1.142698 | 1.747401  | H     | -3.019868 | -0.558315 | 2.733257  |
| H     | -5.122481 | -1.164505 | 2.034116  | C     | -4.778217 | -2.973504 | 1.448820  |
| H     | -3.479332 | -0.866632 | 2.625624  | H     | -5.585876 | -2.559995 | 2.046583  |
| H     | -3.943373 | -0.380738 | 0.979108  | H     | -5.175828 | -3.232662 | 0.463737  |
| C     | -2.451802 | 4.866630  | 0.463738  | H     | -4.416180 | -3.887142 | 1.932298  |
| N     | -2.491702 | 5.947448  | 0.895801  | C     | -4.582735 | 1.819467  | -0.750442 |
| H     | -4.503382 | 1.224843  | -1.400111 | N     | -5.642959 | 1.411024  | -1.002710 |
| ***** |           |           |           | ***** |           |           |           |

| 2-D-12-A-12P34-t2-CCl4 |           |           |           | 2-D-12-A-12P34-t2-DCM |           |           |           |
|------------------------|-----------|-----------|-----------|-----------------------|-----------|-----------|-----------|
| C                      | -2.660412 | -2.306886 | 0.498555  | C                     | -2.631195 | -2.329701 | 0.498855  |
| C                      | -2.492119 | -3.505808 | -0.220181 | C                     | -2.461193 | -3.519692 | -0.237603 |
| H                      | -3.202529 | -4.313622 | -0.120096 | H                     | -3.162534 | -4.335347 | -0.136768 |
| C                      | -1.690312 | -1.264439 | 0.317187  | C                     | -1.674181 | -1.275684 | 0.315304  |
| H                      | -1.766955 | -0.366587 | 0.906712  | H                     | -1.756081 | -0.382729 | 0.911761  |
| C                      | -1.385772 | -3.681943 | -1.041978 | C                     | -1.362306 | -3.677511 | -1.072020 |
| H                      | -1.248392 | -4.628832 | -1.552181 | H                     | -1.221878 | -4.618312 | -1.592755 |
| C                      | -3.206169 | 2.478125  | -0.397760 | C                     | -3.223946 | 2.466350  | -0.398015 |
| C                      | -2.125299 | 1.596276  | -0.646446 | C                     | -2.137249 | 1.589712  | -0.642505 |
| C                      | -2.988393 | 3.702508  | 0.257800  | C                     | -3.017685 | 3.689580  | 0.264531  |
| H                      | -3.823776 | 4.361734  | 0.458557  | H                     | -3.857039 | 4.343719  | 0.464733  |
| C                      | -1.700400 | 4.068932  | 0.610777  | C                     | -1.734131 | 4.061469  | 0.625927  |
| H                      | -1.522279 | 5.030945  | 1.077439  | H                     | -1.564528 | 5.021822  | 1.098755  |
| C                      | -0.587187 | 3.222931  | 0.340799  | C                     | -0.613947 | 3.224007  | 0.354938  |
| C                      | -0.814147 | 1.921415  | -0.231297 | C                     | -0.830279 | 1.923067  | -0.222884 |
| C                      | 0.731191  | 3.676357  | 0.558158  | C                     | 0.700314  | 3.687429  | 0.575324  |
| H                      | 0.883161  | 4.659721  | 0.989434  | H                     | 0.844662  | 4.669749  | 1.011140  |
| C                      | 1.824429  | 2.924668  | 0.122421  | C                     | 1.800191  | 2.946089  | 0.136415  |
| H                      | 2.823356  | 3.343332  | 0.170063  | H                     | 2.795202  | 3.373378  | 0.187027  |
| C                      | 1.618140  | 1.645028  | -0.385211 | C                     | 1.604152  | 1.666804  | -0.377131 |
| C                      | 0.320894  | 1.065171  | -0.431627 | C                     | 0.311973  | 1.076769  | -0.427399 |
| C                      | 1.604670  | -0.706195 | -1.409813 | C                     | 1.606261  | -0.676713 | -1.422687 |
| C                      | 3.991881  | 0.002718  | 0.052279  | C                     | 3.982173  | 0.026629  | 0.058370  |
| C                      | 4.447857  | -1.035736 | 2.194626  | C                     | 4.424945  | -0.968310 | 2.224731  |
| C                      | 5.368600  | 0.146126  | -0.153373 | C                     | 5.360489  | 0.094328  | -0.175138 |

|       |           |           |           |       |           |           |           |
|-------|-----------|-----------|-----------|-------|-----------|-----------|-----------|
| C     | 5.820813  | -0.887399 | 1.981470  | C     | 5.799726  | -0.898454 | 1.982586  |
| C     | 6.280146  | -0.296931 | 0.807335  | C     | 6.266313  | -0.367652 | 0.782545  |
| H     | 5.729501  | 0.604593  | -1.068041 | H     | 5.728230  | 0.509238  | -1.107624 |
| H     | 7.344444  | -0.180666 | 0.635398  | H     | 7.331643  | -0.310593 | 0.588975  |
| P     | 2.853251  | 0.626429  | -1.278135 | P     | 2.848858  | 0.661156  | -1.271693 |
| C     | 0.356081  | -0.360427 | -0.822155 | C     | 0.356930  | -0.344838 | -0.829254 |
| C     | -0.607636 | -1.392536 | -0.583945 | C     | -0.598169 | -1.386633 | -0.594925 |
| C     | -0.401434 | -2.669570 | -1.220840 | C     | -0.386101 | -2.656165 | -1.246789 |
| C     | 0.781933  | -2.906930 | -1.946141 | C     | 0.795934  | -2.877447 | -1.980961 |
| C     | 1.801008  | -1.951839 | -1.995049 | C     | 1.809024  | -1.915433 | -2.022098 |
| H     | 0.925322  | -3.875039 | -2.413749 | H     | 0.943877  | -3.839225 | -2.460154 |
| H     | 2.743341  | -2.191076 | -2.476043 | H     | 2.751224  | -2.144170 | -2.508508 |
| C     | 3.539465  | -0.594559 | 1.237361  | C     | 3.522129  | -0.510387 | 1.269392  |
| H     | 6.526356  | -1.233197 | 2.728677  | H     | 6.500693  | -1.257031 | 2.727959  |
| H     | 4.087378  | -1.496596 | 3.107776  | H     | 4.058731  | -1.380686 | 3.158481  |
| H     | 2.476137  | -0.718259 | 1.409728  | H     | 2.457512  | -0.572309 | 1.466024  |
| H     | -2.312006 | 0.679942  | -1.185320 | H     | -2.316767 | 0.672226  | -1.181801 |
| N     | -3.722876 | -2.115251 | 1.351656  | N     | -3.679390 | -2.160557 | 1.370709  |
| C     | -4.671068 | -3.197405 | 1.579255  | C     | -4.621458 | -3.250915 | 1.593114  |
| H     | -4.196723 | -4.060846 | 2.062817  | H     | -4.138912 | -4.114834 | 2.066598  |
| H     | -5.473811 | -2.839881 | 2.220326  | H     | -5.422052 | -2.903437 | 2.241840  |
| H     | -5.114193 | -3.531056 | 0.637012  | H     | -5.066327 | -3.578677 | 0.650101  |
| C     | -3.800641 | -0.939533 | 2.213497  | C     | -3.749369 | -0.999664 | 2.254973  |
| H     | -4.755526 | -0.949295 | 2.734642  | H     | -4.681013 | -1.041032 | 2.814272  |
| H     | -2.999141 | -0.925886 | 2.962108  | H     | -2.918796 | -0.981771 | 2.969874  |
| H     | -3.751130 | -0.017592 | 1.631268  | H     | -3.742039 | -0.067120 | 1.687199  |
| C     | -4.519293 | 2.122492  | -0.814322 | C     | -4.529614 | 2.108594  | -0.832265 |
| N     | -5.590307 | 1.830119  | -1.147767 | N     | -5.594189 | 1.815705  | -1.186955 |
| ***** |           |           |           | ***** |           |           |           |

|                        |           |           |           |                            |           |           |           |
|------------------------|-----------|-----------|-----------|----------------------------|-----------|-----------|-----------|
| 2-D-12-A-12P34-t2-DMSO |           |           |           | 2-D-12-A-12P34-t3-n-hexane |           |           |           |
| C                      | -2.625408 | -2.335220 | 0.496119  | C                          | -2.613696 | -2.259910 | 0.532437  |
| C                      | -2.452730 | -3.523657 | -0.243306 | C                          | -2.437265 | -3.499560 | -0.137628 |
| H                      | -3.151541 | -4.341502 | -0.142770 | H                          | -3.162262 | -4.292552 | -0.028314 |
| C                      | -1.671642 | -1.278044 | 0.312908  | C                          | -1.641341 | -1.232869 | 0.342327  |
| H                      | -1.753825 | -0.387261 | 0.912517  | H                          | -1.703771 | -0.325397 | 0.915501  |
| C                      | -1.354980 | -3.676879 | -1.079661 | C                          | -1.311297 | -3.714307 | -0.904099 |
| H                      | -1.212253 | -4.616338 | -1.602193 | H                          | -1.159497 | -4.682016 | -1.368577 |
| C                      | -3.230354 | 2.461689  | -0.399903 | C                          | -3.288646 | 2.293383  | -0.423174 |
| C                      | -2.141288 | 1.587190  | -0.643263 | C                          | -2.155881 | 1.473904  | -0.698642 |
| C                      | -3.028113 | 3.684390  | 0.265319  | C                          | -3.102099 | 3.544582  | 0.215788  |
| H                      | -3.869087 | 4.336309  | 0.465748  | H                          | -3.965828 | 4.162532  | 0.432711  |
| C                      | -1.746223 | 4.058412  | 0.629689  | C                          | -1.838905 | 3.985179  | 0.527403  |
| H                      | -1.579709 | 5.017769  | 1.105411  | H                          | -1.702245 | 4.962144  | 0.977526  |
| C                      | -0.623485 | 3.223929  | 0.358286  | C                          | -0.675105 | 3.190406  | 0.247569  |
| C                      | -0.836114 | 1.923358  | -0.221586 | C                          | -0.857139 | 1.870931  | -0.295770 |
| C                      | 0.689144  | 3.690891  | 0.580410  | C                          | 0.624554  | 3.705660  | 0.429991  |
| H                      | 0.830394  | 4.672697  | 1.018131  | H                          | 0.732864  | 4.710483  | 0.825452  |
| C                      | 1.791399  | 2.953017  | 0.140972  | C                          | 1.749170  | 2.995185  | 0.024519  |
| H                      | 2.785114  | 3.383092  | 0.192912  | H                          | 2.729946  | 3.455299  | 0.053928  |
| C                      | 1.599128  | 1.673780  | -0.374418 | C                          | 1.589440  | 1.677450  | -0.422168 |
| C                      | 0.308559  | 1.080082  | -0.426328 | C                          | 0.319979  | 1.066095  | -0.460739 |
| C                      | 1.607330  | -0.668843 | -1.423418 | C                          | 1.655572  | -0.726802 | -1.337851 |
| C                      | 3.980965  | 0.036413  | 0.060448  | C                          | 4.018845  | 0.087865  | 0.059277  |
| C                      | 4.424957  | -0.930227 | 2.239668  | C                          | 4.530230  | -0.622675 | 2.319686  |

|       |           |           |           |       |           |           |           |
|-------|-----------|-----------|-----------|-------|-----------|-----------|-----------|
| C     | 5.357792  | 0.067250  | -0.189643 | C     | 5.369489  | -0.060787 | -0.275633 |
| C     | 5.798168  | -0.898607 | 1.980380  | C     | 5.874762  | -0.777735 | 1.974073  |
| C     | 6.263332  | -0.400495 | 0.765661  | C     | 6.293220  | -0.497134 | 0.676111  |
| H     | 5.724939  | 0.457873  | -1.132752 | H     | 5.701585  | 0.169818  | -1.282438 |
| H     | 7.327362  | -0.372445 | 0.559204  | H     | 7.336684  | -0.609158 | 0.403281  |
| P     | 2.846933  | 0.671664  | -1.267797 | P     | 2.855706  | 0.662886  | -1.270808 |
| C     | 0.357022  | -0.340316 | -0.830474 | C     | 0.402743  | -0.370806 | -0.802750 |
| C     | -0.596150 | -1.384934 | -0.598303 | C     | -0.547306 | -1.403994 | -0.547120 |
| C     | -0.381069 | -2.652618 | -1.252850 | C     | -0.322983 | -2.704146 | -1.101705 |
| C     | 0.802058  | -2.870481 | -1.986974 | C     | 0.889790  | -2.976631 | -1.776088 |
| C     | 1.813244  | -1.906304 | -2.025217 | C     | 1.885165  | -2.014738 | -1.844676 |
| H     | 0.952469  | -3.831228 | -2.467409 | H     | 1.053976  | -3.965107 | -2.190264 |
| H     | 2.756487  | -2.132389 | -2.510913 | H     | 2.841910  | -2.260354 | -2.292793 |
| C     | 3.522245  | -0.467215 | 1.286449  | C     | 3.608040  | -0.194601 | 1.369236  |
| H     | 6.498991  | -1.260674 | 2.724145  | H     | 6.591137  | -1.111036 | 2.716645  |
| H     | 4.060000  | -1.316059 | 3.185146  | H     | 4.202271  | -0.834853 | 3.331459  |
| H     | 2.458918  | -0.498347 | 1.497136  | H     | 2.566906  | -0.072708 | 1.646648  |
| H     | -2.318128 | 0.669584  | -1.183217 | H     | -2.293674 | 0.573078  | -1.276236 |
| N     | -3.672830 | -2.171949 | 1.369774  | N     | -3.684063 | -2.034355 | 1.352230  |
| C     | -4.598403 | -3.274469 | 1.606221  | C     | -4.699493 | -3.067650 | 1.533838  |
| H     | -4.099252 | -4.128976 | 2.079141  | H     | -4.261970 | -3.973302 | 1.964492  |
| H     | -5.397250 | -2.934262 | 2.260719  | H     | -5.467663 | -2.698113 | 2.207124  |
| H     | -5.047229 | -3.612824 | 0.669024  | H     | -5.168138 | -3.324078 | 0.579522  |
| C     | -3.741585 | -1.017407 | 2.263560  | C     | -3.850416 | -0.761817 | 2.055861  |
| H     | -4.682424 | -1.052015 | 2.807615  | H     | -4.789854 | -0.783288 | 2.600933  |
| H     | -2.921618 | -1.016238 | 2.990828  | H     | -3.037587 | -0.600451 | 2.769703  |
| H     | -3.714047 | -0.081195 | 1.703416  | H     | -3.877047 | 0.075906  | 1.355449  |
| C     | -4.533437 | 2.103177  | -0.839484 | C     | -4.584012 | 1.868171  | -0.794263 |
| N     | -5.595526 | 1.809417  | -1.201554 | N     | -5.646768 | 1.497778  | -1.094298 |
| ***** |           |           |           | ***** |           |           |           |

ST2: Energy Difference (eV) between Singlet and nearest low lying triplet:

| System         | $\Delta E_{st}$ | System         | $\Delta E_{st}$ |
|----------------|-----------------|----------------|-----------------|
| C1234          | 0.195           | P1234          | 0.262           |
| C1234-CCl4     | 0.164           | P1234-CCl4     | 0.234           |
| C1234-DCM      | 0.165           | P1234-DCM      | 0.234           |
| C1234-DMSO     | 0.165           | P1234-DMSO     | 0.234           |
| C1234-n-hexane | 0.168           | P1234-n-hexane | 0.238           |
| 1C234          | 0.031           | 1P234          | 0.089           |
| 1C234-CCl4     | 0.004           | 1P234-CCl4     | 0.075           |
| 1C234-DCM      | 0.106           | 1P234-DCM      | 0.073           |
| 1C234-DMSO     | 0.105           | 1P234-DMSO     | 0.072           |
| 1C234-n-hexane | 0.008           | 1P234-n-hexane | 0.077           |
| 12C34          | 0.105           | 12P34          | 0.064           |
| 12C34-CCl4     | 0.037           | 12P34-CCl4     | 0.006           |

|                         |       |                         |        |
|-------------------------|-------|-------------------------|--------|
| 12C34-DCM               | 0.039 | 12P34-DCM               | 0.002  |
| 12C34-DMSO              | 0.040 | 12P34-DMSO              | 0.023  |
| 12C34-n-hexane          | 0.046 | 12P34-n-hexane          | 0.015  |
| 1-A-13-D-P1234          | 0.033 | 1-D-13-A-1P234          | 0.009  |
| 1-A-13-D-P1234-CCl4     | 0.012 | 1-D-13-A-1P234-CCL4     | 0.087  |
| 1-A-13-D-P1234-DCM      | 0.017 | 1-D-13-A-1P234-DCM      | 0.084  |
| 1-A-13-D-P1234-DMSO     | 0.017 | 1-D-13-A-1P234-DMSO     | 0.081  |
| 1-A-13-D-P1234-n-hexane | 0.016 | 1-D-13-A-1P234-n-hexane | 0.090  |
| 3-A-12-D-P1234          | 0.008 | 3-D-13-A-1P234          | 0.301  |
| 3-A-12-D-P1234-CCl4     | 0.216 | 3-D-13-A-1P234-CCl4     | 0.254  |
| 3-A-12-D-P1234-DCM      | 0.216 | 3-D-13-A-1P234-DCM      | 0.246  |
| 3-A-12-D-P1234-DMSO     | 0.214 | 3-D-13-A-1P234-DMSO     | 0.245  |
| 3-A-12-D-P1234-n-hexane | 0.219 | 3-D-13-A-1P234-n-hexane | 0.261  |
| 1-A-11-D-P1234          | 0.238 | 2-D-10-A-12P34          | 0.114  |
| 1-A-11-D-P1234-CCl4     | 0.195 | 2-D-10-A-12P34-CCl4     | 0.053  |
| 1-A-11-D-P1234-DCM      | 0.182 | 2-D-10-A-12P34-DCM      | 0.038  |
| 1-A-11-D-P1234-DMSO     | 0.178 | 2-D-10-A-12P34-DMSO     | 0.0307 |
| 1-A-11-D-P1234-n-hexane | 0.202 | 2-D-10-A-12P34-n-hexane | 0.062  |
| 3-A-10-D-P1234          | 0.261 | 2-D-12-A-12P34          | 0.048  |
| 3-A-10-D-P1234-CCl4     | 0.244 | 2-D-12-A-12P34-CCl4     | 0.627  |
| 3-A-10-D-P1234-DCM      | 0.257 | 2-D-12-A-12P34-DCM      | 0.619  |
| 3-A-10-D-P1234-DMSO     | 0.260 | 2-D-12-A-12P34-DMSO     | 0.620  |
| 3-A-10-D-P1234-n-hexane | 0.246 | 2-D-12-A-12P34-n-hexane | 0.006  |

ST3: Value of Spin Orbit Coupling Matrix Element calculated at CAM-B3LYP/cc-PVTZ level of theory.

| SYSTEM | CCl4 | DCM  | DMSO | n-hexane | Vacuum |
|--------|------|------|------|----------|--------|
| C1234  | 0.17 | 0.19 | 0.20 | 0.16     | 0.15   |
| 1C234  | 0.11 | 0.32 | 0.33 | 0.06     | 0.11   |
| 12C34  | 0.09 | 0.11 | 0.11 | 0.09     | 0.10   |
| P1234  | 1.10 | 1.11 | 1.11 | 1.11     | 1.15   |
| 1P234  | 0.31 | 0.34 | 0.36 | 0.29     | 0.19   |

|                |      |      |      |      |      |
|----------------|------|------|------|------|------|
| 12P34          | 1.25 | 1.25 | 1.08 | 1.26 | 1.31 |
| 1-A-13-D-P1234 | 0.46 | 0.52 | 0.54 | 0.44 | 0.42 |
| 3-A-12-D-P1234 | 1.11 | 1.18 | 1.20 | 1.11 | 0.44 |
| 1-A-11-D-P1234 | 1.32 | 1.13 | 1.06 | 1.35 | 1.42 |
| 3-A-10-D-P1234 | 1.00 | 0.97 | 0.95 | 1.01 | 1.10 |
| 1-D-13-A-1P234 | 1.09 | 1.14 | 1.15 | 1.09 | 0.69 |
| 3-D-13-A-1P234 | 0.47 | 0.47 | 0.48 | 0.47 | 0.46 |
| 2-D-10-A-12P34 | 0.74 | 0.76 | 0.77 | 0.74 | 0.73 |
| 2-D-12-A-12P34 | 0.34 | 0.35 | 0.37 | 0.85 | 0.81 |

ST4: Value of Rate of Inter System Crossing (in sec<sup>-1</sup>).

| SYSTEM         | CCl4     | DCM      | DMSO     | n-hexane | Vacuum   |
|----------------|----------|----------|----------|----------|----------|
| C1234          | 9.88E+06 | 9.10E+06 | 8.99E+06 | 5.58E+06 | 6.72E+06 |
| 1C234          | 7.68E+05 | 7.38E+06 | 8.51E+06 | 2.36E+05 | 1.99E+06 |
| 12C34          | 1.84E+06 | 4.72E+06 | 4.53E+06 | 8.68E+05 | 1.90E+06 |
| P1234          | 5.03E+08 | 5.27E+08 | 5.32E+08 | 4.89E+08 | 5.51E+08 |
| 1P234          | 2.42E+07 | 6.18E+07 | 4.06E+07 | 9.33E+06 | 1.06E+07 |
| 12P34          | 3.67E+09 | 7.65E+07 | 5.17E+07 | 4.76E+08 | 6.76E+08 |
| 1-A-13-D-P1234 | 1.77E+07 | 3.36E+07 | 2.11E+08 | 1.83E+07 | 2.96E+08 |
| 3-A-12-D-P1234 | 5.30E+07 | 6.02E+07 | 6.15E+07 | 6.61E+07 | 1.27E+07 |
| 1-A-11-D-P1234 | 5.66E+08 | 4.40E+08 | 5.55E+08 | 6.30E+08 | 5.90E+08 |
| 3-A-10-D-P1234 | 4.32E+07 | 3.95E+07 | 3.84E+07 | 4.39E+07 | 5.17E+07 |
| 1-D-13-A-1P234 | 1.03E+09 | 7.44E+08 | 6.29E+08 | 7.99E+08 | 7.75E+07 |
| 3-D-13-A-1P234 | 5.37E+07 | 4.76E+07 | 6.28E+07 | 3.52E+07 | 3.98E+07 |

|                |          |          |          |          |          |
|----------------|----------|----------|----------|----------|----------|
| 2-D-10-A-12P34 | 3.08E+08 | 4.61E+08 | 6.17E+08 | 2.12E+08 | 1.47E+08 |
| 2-D-12-A-12P34 | 1.10E+07 | 1.69E+08 | 1.41E+07 | 2.54E+08 | 6.75E+07 |

ST5:  $S_0 \rightarrow S_n$  and  $S_0 \rightarrow T_n$  excitation energy Ex. En. (in eV), wavelength WL (in nm) and Oscillator Strength (unitless) calculated at CAM-B3LYP/cc-PVTZ level of theory.

#### 12C34-OPA-CCl4

| Singlets          |        |        |        | Triplets          |        |        |        |
|-------------------|--------|--------|--------|-------------------|--------|--------|--------|
|                   | Ex.En  | WL     | OS     |                   | Ex.En  | WL     | OS     |
| Excited State 5:  | 3.6375 | 340.85 | 0.4633 | Excited State 1:  | 2.0239 | 612.59 | 0.0000 |
| Excited State 11: | 4.2643 | 290.75 | 0.0035 | Excited State 2:  | 2.6438 | 468.96 | 0.0000 |
| Excited State 12: | 4.3394 | 285.72 | 0.0008 | Excited State 3:  | 3.5101 | 353.22 | 0.0000 |
| Excited State 14: | 4.4066 | 281.36 | 0.0130 | Excited State 4:  | 3.6007 | 344.33 | 0.0000 |
| Excited State 15: | 4.8990 | 253.08 | 0.0091 | Excited State 6:  | 3.7850 | 327.57 | 0.0000 |
| Excited State 16: | 5.0329 | 246.35 | 0.2860 | Excited State 7:  | 3.8835 | 319.26 | 0.0000 |
| Excited State 17: | 5.2256 | 237.27 | 0.0149 | Excited State 8:  | 4.0673 | 304.83 | 0.0000 |
| Excited State 18: | 5.3332 | 232.48 | 0.4923 | Excited State 9:  | 4.0886 | 303.25 | 0.0000 |
| Excited State 19: | 5.4046 | 229.41 | 0.9805 | Excited State 10: | 4.2305 | 293.07 | 0.0000 |
| Excited State 20: | 5.5449 | 223.60 | 0.1789 | Excited State 13: | 4.3570 | 284.57 | 0.0000 |

#### 12C34-OPA-DCM

| Singlets          |        |        |        | Triplets         |        |        |        |
|-------------------|--------|--------|--------|------------------|--------|--------|--------|
|                   | Ex.En  | WL     | OS     |                  | Ex.En  | WL     | OS     |
| Excited State 5:  | 3.6432 | 340.32 | 0.4561 | Excited State 1: | 2.0299 | 610.78 | 0.0000 |
| Excited State 11: | 4.2683 | 290.48 | 0.0032 | Excited State 2: | 2.6485 | 468.13 | 0.0000 |
| Excited State 12: | 4.3423 | 285.53 | 0.0008 | Excited State 3: | 3.5153 | 352.70 | 0.0000 |
| Excited State 14: | 4.4097 | 281.16 | 0.0122 | Excited State 4: | 3.6038 | 344.03 | 0.0000 |
| Excited State 15: | 4.9025 | 252.90 | 0.0089 | Excited State 6: | 3.7873 | 327.37 | 0.0000 |

|                   |        |        |        |                   |        |        |        |
|-------------------|--------|--------|--------|-------------------|--------|--------|--------|
| Excited State 16: | 5.0418 | 245.91 | 0.2814 | Excited State 7:  | 3.8850 | 319.14 | 0.0000 |
| Excited State 17: | 5.2280 | 237.15 | 0.0141 | Excited State 8:  | 4.0708 | 304.57 | 0.0000 |
| Excited State 18: | 5.3405 | 232.16 | 0.4039 | Excited State 9:  | 4.0890 | 303.21 | 0.0000 |
| Excited State 19: | 5.4126 | 229.06 | 1.0583 | Excited State 10: | 4.2344 | 292.80 | 0.0000 |
| Excited State 20: | 5.5591 | 223.03 | 0.0826 | Excited State 13: | 4.3609 | 284.31 | 0.0000 |

12C34-OPA-DMSO

| Singlets          |        |        |        | Triplets          |        |        |        |
|-------------------|--------|--------|--------|-------------------|--------|--------|--------|
|                   | Ex.En  | WL     | OS     |                   | Ex.En  | WL     | OS     |
| Excited State 5:  | 3.6448 | 340.17 | 0.4546 | Excited State 1:  | 2.0324 | 610.03 | 0.0000 |
| Excited State 11: | 4.2698 | 290.37 | 0.0030 | Excited State 2:  | 2.6504 | 467.79 | 0.0000 |
| Excited State 12: | 4.3436 | 285.44 | 0.0008 | Excited State 3:  | 3.5175 | 352.48 | 0.0000 |
| Excited State 14: | 4.4112 | 281.07 | 0.0120 | Excited State 4:  | 3.6051 | 343.92 | 0.0000 |
| Excited State 15: | 4.9035 | 252.85 | 0.0091 | Excited State 6:  | 3.7882 | 327.29 | 0.0000 |
| Excited State 16: | 5.0444 | 245.78 | 0.2801 | Excited State 7:  | 3.8857 | 319.08 | 0.0000 |
| Excited State 17: | 5.2290 | 237.11 | 0.0142 | Excited State 8:  | 4.0724 | 304.45 | 0.0000 |
| Excited State 18: | 5.3427 | 232.06 | 0.3801 | Excited State 9:  | 4.0893 | 303.19 | 0.0000 |
| Excited State 19: | 5.4143 | 228.99 | 1.0808 | Excited State 10: | 4.2361 | 292.68 | 0.0000 |
| Excited State 20: | 5.5613 | 222.94 | 0.0441 | Excited State 13: | 4.3627 | 284.19 | 0.0000 |

12C34-OPA

| Singlets          |        |        |        | Triplets         |        |        |        |
|-------------------|--------|--------|--------|------------------|--------|--------|--------|
|                   | Ex.En  | WL     | OS     |                  | Ex.En  | WL     | OS     |
| Excited State 5:  | 3.7027 | 334.85 | 0.3385 | Excited State 1: | 2.0187 | 614.17 | 0.0000 |
| Excited State 11: | 4.2653 | 290.68 | 0.0026 | Excited State 2: | 2.6399 | 469.66 | 0.0000 |
| Excited State 12: | 4.3466 | 285.25 | 0.0001 | Excited State 3: | 3.5056 | 353.68 | 0.0000 |
| Excited State 14: | 4.4264 | 280.10 | 0.0081 | Excited State 4: | 3.5980 | 344.59 | 0.0000 |
| Excited State 15: | 4.9009 | 252.98 | 0.0034 | Excited State 6: | 3.7830 | 327.74 | 0.0000 |
| Excited State 16: | 5.1103 | 242.62 | 0.2291 | Excited State 7: | 3.8825 | 319.34 | 0.0000 |
| Excited State 17: | 5.2470 | 236.30 | 0.0107 | Excited State 8: | 4.0646 | 305.03 | 0.0000 |

|                   |        |        |        |                   |        |        |        |
|-------------------|--------|--------|--------|-------------------|--------|--------|--------|
| Excited State 18: | 5.3487 | 231.80 | 0.0600 | Excited State 9:  | 4.0887 | 303.24 | 0.0000 |
| Excited State 19: | 5.4659 | 226.83 | 0.3610 | Excited State 10: | 4.2273 | 293.29 | 0.0000 |
| Excited State 20: | 5.5683 | 222.66 | 0.3573 | Excited State 13: | 4.3538 | 284.77 | 0.0000 |

12C34-OPA-n-hexane

| Singlets          |        |        |        | Triplets          |        |        |        |
|-------------------|--------|--------|--------|-------------------|--------|--------|--------|
|                   | Ex.En  | WL     | OS     |                   | Ex.En  | WL     | OS     |
| Excited State 5:  | 3.6465 | 340.01 | 0.4449 | Excited State 1:  | 2.0229 | 612.91 | 0.0000 |
| Excited State 11: | 4.2643 | 290.75 | 0.0034 | Excited State 2:  | 2.6430 | 469.10 | 0.0000 |
| Excited State 12: | 4.3405 | 285.64 | 0.0006 | Excited State 3:  | 3.5092 | 353.31 | 0.0000 |
| Excited State 14: | 4.4093 | 281.19 | 0.0123 | Excited State 4:  | 3.6002 | 344.38 | 0.0000 |
| Excited State 15: | 4.8992 | 253.07 | 0.0078 | Excited State 6:  | 3.7846 | 327.60 | 0.0000 |
| Excited State 16: | 5.0435 | 245.83 | 0.2792 | Excited State 7:  | 3.8833 | 319.28 | 0.0000 |
| Excited State 17: | 5.2286 | 237.13 | 0.0138 | Excited State 8:  | 4.0667 | 304.88 | 0.0000 |
| Excited State 18: | 5.3375 | 232.29 | 0.3397 | Excited State 9:  | 4.0885 | 303.25 | 0.0000 |
| Excited State 19: | 5.4160 | 228.92 | 0.9806 | Excited State 10: | 4.2298 | 293.12 | 0.0000 |
| Excited State 20: | 5.5452 | 223.59 | 0.2174 | Excited State 13: | 4.3563 | 284.61 | 0.0000 |

12P34-geo-opt-abs

| Singlets          |        |        |        | Triplets          |        |        |        |
|-------------------|--------|--------|--------|-------------------|--------|--------|--------|
|                   | Ex.En  | WL     | OS     |                   | Ex.En  | WL     | OS     |
| Excited State 6:  | 3.6210 | 342.41 | 0.2286 | Excited State 1:  | 2.0131 | 615.89 | 0.0000 |
| Excited State 10: | 4.0919 | 303.00 | 0.0613 | Excited State 2:  | 2.6097 | 475.08 | 0.0000 |
| Excited State 13: | 4.2283 | 293.23 | 0.0080 | Excited State 3:  | 3.4445 | 359.95 | 0.0000 |
| Excited State 14: | 4.3941 | 282.16 | 0.0294 | Excited State 4:  | 3.5414 | 350.10 | 0.0000 |
| Excited State 15: | 4.6730 | 265.32 | 0.0387 | Excited State 5:  | 3.5573 | 348.53 | 0.0000 |
| Excited State 16: | 4.8970 | 253.18 | 0.2502 | Excited State 7:  | 3.7736 | 328.56 | 0.0000 |
| Excited State 17: | 4.9460 | 250.67 | 0.2851 | Excited State 8:  | 3.9750 | 311.91 | 0.0000 |
| Excited State 18: | 5.0057 | 247.69 | 0.0656 | Excited State 9:  | 4.0121 | 309.02 | 0.0000 |
| Excited State 19: | 5.0668 | 244.70 | 0.0326 | Excited State 11: | 4.1775 | 296.79 | 0.0000 |

Excited State 20: 5.1656 240.02 0.0714 Excited State 12: 4.1963 295.46 0.0000

12P34-geo-opt-abs-CCl4

| Singlets          |        |        |        | Triplets          |        |        |        |
|-------------------|--------|--------|--------|-------------------|--------|--------|--------|
|                   | Ex.En  | WL     | OS     |                   | Ex.En  | WL     | OS     |
| Excited State 6:  | 3.5698 | 347.32 | 0.3255 | Excited State 1:  | 2.0153 | 615.23 | 0.0000 |
| Excited State 10: | 4.0804 | 303.85 | 0.1071 | Excited State 2:  | 2.6124 | 474.60 | 0.0000 |
| Excited State 13: | 4.2245 | 293.49 | 0.0123 | Excited State 3:  | 3.4490 | 359.47 | 0.0000 |
| Excited State 14: | 4.3671 | 283.91 | 0.0517 | Excited State 4:  | 3.5447 | 349.77 | 0.0000 |
| Excited State 15: | 4.6649 | 265.78 | 0.0867 | Excited State 5:  | 3.5633 | 347.95 | 0.0000 |
| Excited State 16: | 4.8513 | 255.57 | 0.4272 | Excited State 7:  | 3.7744 | 328.49 | 0.0000 |
| Excited State 17: | 4.8744 | 254.36 | 0.4732 | Excited State 8:  | 3.9752 | 311.89 | 0.0000 |
| Excited State 18: | 4.9997 | 247.98 | 0.0496 | Excited State 9:  | 4.0139 | 308.88 | 0.0000 |
| Excited State 19: | 5.0709 | 244.50 | 0.0177 | Excited State 11: | 4.1793 | 296.66 | 0.0000 |
| Excited State 20: | 5.1610 | 240.23 | 0.1132 | Excited State 12: | 4.2009 | 295.14 | 0.0000 |

12P34-geo-opt-abs-DCM

| Singlets          |        |        |        | Triplets          |        |        |        |
|-------------------|--------|--------|--------|-------------------|--------|--------|--------|
|                   | Ex.En  | WL     | OS     |                   | Ex.En  | WL     | OS     |
| Excited State 6:  | 3.5717 | 347.13 | 0.3184 | Excited State 1:  | 2.0177 | 614.49 | 0.0000 |
| Excited State 10: | 4.0868 | 303.38 | 0.1005 | Excited State 2:  | 2.6155 | 474.04 | 0.0000 |
| Excited State 13: | 4.2256 | 293.41 | 0.0125 | Excited State 3:  | 3.4539 | 358.97 | 0.0000 |
| Excited State 14: | 4.3717 | 283.61 | 0.0495 | Excited State 4:  | 3.5478 | 349.46 | 0.0000 |
| Excited State 15: | 4.6666 | 265.69 | 0.0725 | Excited State 5:  | 3.5697 | 347.32 | 0.0000 |
| Excited State 16: | 4.8577 | 255.23 | 0.4474 | Excited State 7:  | 3.7754 | 328.40 | 0.0000 |
| Excited State 17: | 4.8816 | 253.98 | 0.4560 | Excited State 8:  | 3.9754 | 311.88 | 0.0000 |
| Excited State 18: | 5.0118 | 247.39 | 0.0527 | Excited State 9:  | 4.0162 | 308.71 | 0.0000 |
| Excited State 19: | 5.0885 | 243.66 | 0.0102 | Excited State 11: | 4.1816 | 296.50 | 0.0000 |
| Excited State 20: | 5.1820 | 239.26 | 0.1096 | Excited State 12: | 4.2061 | 294.77 | 0.0000 |

12P34-geo-opt-abs-DMSO

| Singlets          |        |        |        | Triplets          |        |        |        |
|-------------------|--------|--------|--------|-------------------|--------|--------|--------|
|                   | Ex.En  | WL     | OS     |                   | Ex.En  | WL     | OS     |
| Excited State 5:  | 3.5716 | 347.13 | 0.3167 | Excited State 1:  | 2.0186 | 614.22 | 0.0000 |
| Excited State 10: | 4.0886 | 303.24 | 0.0988 | Excited State 2:  | 2.6167 | 473.82 | 0.0000 |
| Excited State 13: | 4.2261 | 293.38 | 0.0127 | Excited State 3:  | 3.4558 | 358.78 | 0.0000 |
| Excited State 14: | 4.3732 | 283.51 | 0.0487 | Excited State 4:  | 3.5490 | 349.35 | 0.0000 |
| Excited State 15: | 4.6668 | 265.67 | 0.0676 | Excited State 6:  | 3.5719 | 347.11 | 0.0000 |
| Excited State 16: | 4.8593 | 255.15 | 0.4591 | Excited State 7:  | 3.7759 | 328.36 | 0.0000 |
| Excited State 17: | 4.8834 | 253.89 | 0.4455 | Excited State 8:  | 3.9755 | 311.87 | 0.0000 |
| Excited State 18: | 5.0164 | 247.16 | 0.0557 | Excited State 9:  | 4.0170 | 308.65 | 0.0000 |
| Excited State 19: | 5.0965 | 243.27 | 0.0083 | Excited State 11: | 4.1826 | 296.43 | 0.0000 |
| Excited State 20: | 5.1903 | 238.88 | 0.1071 | Excited State 12: | 4.2083 | 294.62 | 0.0000 |

12P34-geo-opt-abs-n-hexane

| Singlets          |        |        |        | Triplets          |        |        |        |
|-------------------|--------|--------|--------|-------------------|--------|--------|--------|
|                   | Ex.En  | WL     | OS     |                   | Ex.En  | WL     | OS     |
| Excited State 6:  | 3.5771 | 346.60 | 0.3109 | Excited State 1:  | 2.0149 | 615.35 | 0.0000 |
| Excited State 10: | 4.0820 | 303.74 | 0.0992 | Excited State 2:  | 2.6118 | 474.70 | 0.0000 |
| Excited State 13: | 4.2250 | 293.45 | 0.0115 | Excited State 3:  | 3.4482 | 359.56 | 0.0000 |
| Excited State 14: | 4.3711 | 283.65 | 0.0479 | Excited State 4:  | 3.5442 | 349.83 | 0.0000 |
| Excited State 15: | 4.6662 | 265.71 | 0.0773 | Excited State 5:  | 3.5621 | 348.07 | 0.0000 |
| Excited State 16: | 4.8587 | 255.18 | 0.4053 | Excited State 7:  | 3.7743 | 328.50 | 0.0000 |
| Excited State 17: | 4.8844 | 253.84 | 0.4424 | Excited State 8:  | 3.9752 | 311.90 | 0.0000 |
| Excited State 18: | 4.9996 | 247.99 | 0.0488 | Excited State 9:  | 4.0136 | 308.91 | 0.0000 |
| Excited State 19: | 5.0693 | 244.58 | 0.0201 | Excited State 11: | 4.1790 | 296.68 | 0.0000 |
| Excited State 20: | 5.1607 | 240.24 | 0.1065 | Excited State 12: | 4.2000 | 295.20 | 0.0000 |

1C234-OPA-CCl4

| Singlets |       |    |    | Triplets |       |    |    |
|----------|-------|----|----|----------|-------|----|----|
|          | Ex.En | WL | OS |          | Ex.En | WL | OS |

|                   |        |        |        |                   |        |        |        |
|-------------------|--------|--------|--------|-------------------|--------|--------|--------|
| Excited State 8:  | 3.8906 | 318.68 | 0.1454 | Excited State 1:  | 2.3127 | 536.10 | 0.0000 |
| Excited State 9:  | 4.0780 | 304.03 | 0.1074 | Excited State 2:  | 3.0125 | 411.57 | 0.0000 |
| Excited State 12: | 4.4575 | 278.14 | 0.7888 | Excited State 3:  | 3.4653 | 357.79 | 0.0000 |
| Excited State 14: | 4.7230 | 262.51 | 0.1876 | Excited State 4:  | 3.5130 | 352.93 | 0.0000 |
| Excited State 15: | 4.9191 | 252.04 | 0.1126 | Excited State 5:  | 3.6511 | 339.58 | 0.0000 |
| Excited State 16: | 5.0543 | 245.30 | 0.0908 | Excited State 6:  | 3.7823 | 327.80 | 0.0000 |
| Excited State 17: | 5.2532 | 236.02 | 0.1482 | Excited State 7:  | 3.8868 | 318.99 | 0.0000 |
| Excited State 18: | 5.3733 | 230.74 | 0.0061 | Excited State 10: | 4.2906 | 288.97 | 0.0000 |
| Excited State 19: | 5.4678 | 226.75 | 0.0041 | Excited State 11: | 4.3170 | 287.20 | 0.0000 |
| Excited State 20: | 5.6526 | 219.34 | 0.5505 | Excited State 13: | 4.4581 | 278.11 | 0.0000 |

1C234-OPA-DCM

| Singlets          |        |        |        | Triplets          |        |        |        |
|-------------------|--------|--------|--------|-------------------|--------|--------|--------|
|                   | Ex.En  | WL     | OS     |                   | Ex.En  | WL     | OS     |
| Excited State 7:  | 3.8915 | 318.61 | 0.1422 | Excited State 1:  | 2.3196 | 534.51 | 0.0000 |
| Excited State 9:  | 4.0856 | 303.46 | 0.1042 | Excited State 2:  | 3.0150 | 411.23 | 0.0000 |
| Excited State 13: | 4.4645 | 277.71 | 0.7726 | Excited State 3:  | 3.4682 | 357.49 | 0.0000 |
| Excited State 14: | 4.7296 | 262.14 | 0.1857 | Excited State 4:  | 3.5179 | 352.43 | 0.0000 |
| Excited State 15: | 4.9231 | 251.84 | 0.1096 | Excited State 5:  | 3.6525 | 339.45 | 0.0000 |
| Excited State 16: | 5.0562 | 245.21 | 0.0952 | Excited State 6:  | 3.7851 | 327.56 | 0.0000 |
| Excited State 17: | 5.2590 | 235.76 | 0.1431 | Excited State 8:  | 3.8931 | 318.47 | 0.0000 |
| Excited State 18: | 5.3762 | 230.62 | 0.0055 | Excited State 10: | 4.2909 | 288.95 | 0.0000 |
| Excited State 19: | 5.4706 | 226.64 | 0.0039 | Excited State 11: | 4.3209 | 286.94 | 0.0000 |
| Excited State 20: | 5.6581 | 219.13 | 0.5487 | Excited State 12: | 4.4583 | 278.09 | 0.0000 |

1C234-OPA-DMSO

| Singlets         |        |        |        | Triplets         |        |        |        |
|------------------|--------|--------|--------|------------------|--------|--------|--------|
|                  | Ex.En  | WL     | OS     |                  | Ex.En  | WL     | OS     |
| Excited State 7: | 3.8917 | 318.59 | 0.1418 | Excited State 1: | 2.3225 | 533.84 | 0.0000 |
| Excited State 9: | 4.0887 | 303.24 | 0.1032 | Excited State 2: | 3.0160 | 411.09 | 0.0000 |

|                   |        |        |        |                   |        |        |        |
|-------------------|--------|--------|--------|-------------------|--------|--------|--------|
| Excited State 13: | 4.4665 | 277.59 | 0.7690 | Excited State 3:  | 3.4694 | 357.36 | 0.0000 |
| Excited State 14: | 4.7320 | 262.01 | 0.1859 | Excited State 4:  | 3.5200 | 352.23 | 0.0000 |
| Excited State 15: | 4.9244 | 251.77 | 0.1088 | Excited State 5:  | 3.6529 | 339.41 | 0.0000 |
| Excited State 16: | 5.0569 | 245.18 | 0.0977 | Excited State 6:  | 3.7863 | 327.45 | 0.0000 |
| Excited State 17: | 5.2609 | 235.67 | 0.1409 | Excited State 8:  | 3.8958 | 318.25 | 0.0000 |
| Excited State 18: | 5.3772 | 230.57 | 0.0052 | Excited State 10: | 4.2908 | 288.96 | 0.0000 |
| Excited State 19: | 5.4716 | 226.60 | 0.0038 | Excited State 11: | 4.3224 | 286.84 | 0.0000 |
| Excited State 20: | 5.6593 | 219.08 | 0.5475 | Excited State 12: | 4.4585 | 278.08 | 0.0000 |

1C234-OPA

| Singlets          |        |        |        | Triplets          |        |        |        |
|-------------------|--------|--------|--------|-------------------|--------|--------|--------|
|                   | Ex.En  | WL     | OS     |                   | Ex.En  | WL     | OS     |
| Excited State 8:  | 3.9126 | 316.88 | 0.0764 | Excited State 1:  | 2.3072 | 537.37 | 0.0000 |
| Excited State 9:  | 4.0987 | 302.50 | 0.0868 | Excited State 2:  | 3.0104 | 411.85 | 0.0000 |
| Excited State 13: | 4.5418 | 272.98 | 0.5635 | Excited State 3:  | 3.4630 | 358.02 | 0.0000 |
| Excited State 14: | 4.7566 | 260.66 | 0.1063 | Excited State 4:  | 3.5086 | 353.37 | 0.0000 |
| Excited State 15: | 4.9375 | 251.11 | 0.0975 | Excited State 5:  | 3.6498 | 339.70 | 0.0000 |
| Excited State 16: | 5.0647 | 244.80 | 0.0647 | Excited State 6:  | 3.7801 | 327.99 | 0.0000 |
| Excited State 17: | 5.2950 | 234.15 | 0.1242 | Excited State 7:  | 3.8817 | 319.41 | 0.0000 |
| Excited State 18: | 5.3774 | 230.57 | 0.0054 | Excited State 10: | 4.2901 | 289.00 | 0.0000 |
| Excited State 19: | 5.4686 | 226.72 | 0.0043 | Excited State 11: | 4.3138 | 287.41 | 0.0000 |
| Excited State 20: | 5.6963 | 217.66 | 0.2908 | Excited State 12: | 4.4581 | 278.11 | 0.0000 |

1C234-OPA-n-hexane

| Singlets          |        |        |        | Triplets         |        |        |        |
|-------------------|--------|--------|--------|------------------|--------|--------|--------|
|                   | Ex.En  | WL     | OS     |                  | Ex.En  | WL     | OS     |
| Excited State 8:  | 3.8941 | 318.39 | 0.1335 | Excited State 1: | 2.3116 | 536.35 | 0.0000 |
| Excited State 9:  | 4.0805 | 303.85 | 0.1051 | Excited State 2: | 3.0121 | 411.62 | 0.0000 |
| Excited State 13: | 4.4692 | 277.42 | 0.7562 | Excited State 3: | 3.4648 | 357.84 | 0.0000 |
| Excited State 14: | 4.7281 | 262.23 | 0.1739 | Excited State 4: | 3.5121 | 353.02 | 0.0000 |

|                   |        |        |        |                   |        |        |        |
|-------------------|--------|--------|--------|-------------------|--------|--------|--------|
| Excited State 15: | 4.9214 | 251.93 | 0.1110 | Excited State 5:  | 3.6509 | 339.60 | 0.0000 |
| Excited State 16: | 5.0558 | 245.23 | 0.0862 | Excited State 6:  | 3.7818 | 327.84 | 0.0000 |
| Excited State 17: | 5.2592 | 235.75 | 0.1458 | Excited State 7:  | 3.8858 | 319.07 | 0.0000 |
| Excited State 18: | 5.3738 | 230.72 | 0.0059 | Excited State 10: | 4.2905 | 288.97 | 0.0000 |
| Excited State 19: | 5.4678 | 226.75 | 0.0041 | Excited State 11: | 4.3164 | 287.24 | 0.0000 |
| Excited State 20: | 5.6595 | 219.07 | 0.5058 | Excited State 12: | 4.4580 | 278.11 | 0.0000 |

1-D-13-A-1P234-OPA-CCl4

| Singlets          |        |        |        | Triplets          |        |        |        |
|-------------------|--------|--------|--------|-------------------|--------|--------|--------|
|                   | Ex.En  | WL     | OS     |                   | Ex.En  | WL     | OS     |
| Excited State 5:  | 3.4195 | 362.58 | 0.1111 | Excited State 1:  | 2.1368 | 580.22 | 0.0000 |
| Excited State 10: | 3.7301 | 332.39 | 0.0753 | Excited State 2:  | 2.6523 | 467.46 | 0.0000 |
| Excited State 12: | 3.8909 | 318.65 | 0.0016 | Excited State 3:  | 3.2059 | 386.74 | 0.0000 |
| Excited State 14: | 4.0435 | 306.62 | 0.3377 | Excited State 4:  | 3.3328 | 372.01 | 0.0000 |
| Excited State 15: | 4.2758 | 289.96 | 0.4706 | Excited State 6:  | 3.4558 | 358.77 | 0.0000 |
| Excited State 16: | 4.3674 | 283.89 | 0.2159 | Excited State 7:  | 3.4788 | 356.40 | 0.0000 |
| Excited State 17: | 4.5621 | 271.77 | 0.1057 | Excited State 8:  | 3.6070 | 343.73 | 0.0000 |
| Excited State 18: | 4.7433 | 261.39 | 0.0815 | Excited State 9:  | 3.6637 | 338.42 | 0.0000 |
| Excited State 19: | 4.8689 | 254.64 | 0.0237 | Excited State 11: | 3.7546 | 330.22 | 0.0000 |
| Excited State 20: | 4.9444 | 250.76 | 0.0122 | Excited State 13: | 4.0295 | 307.69 | 0.0000 |

1-D-13-A-1P234-OPA-DCM

| Singlets          |        |        |        | Triplets         |        |        |        |
|-------------------|--------|--------|--------|------------------|--------|--------|--------|
|                   | Ex.En  | WL     | OS     |                  | Ex.En  | WL     | OS     |
| Excited State 5:  | 3.3963 | 365.05 | 0.1075 | Excited State 1: | 2.1389 | 579.65 | 0.0000 |
| Excited State 10: | 3.7226 | 333.06 | 0.0721 | Excited State 2: | 2.6408 | 469.49 | 0.0000 |
| Excited State 12: | 3.8762 | 319.86 | 0.0019 | Excited State 3: | 3.2052 | 386.82 | 0.0000 |
| Excited State 14: | 4.0368 | 307.13 | 0.2564 | Excited State 4: | 3.3126 | 374.28 | 0.0000 |
| Excited State 15: | 4.2718 | 290.24 | 0.5111 | Excited State 6: | 3.4602 | 358.32 | 0.0000 |
| Excited State 16: | 4.3666 | 283.94 | 0.2243 | Excited State 7: | 3.4745 | 356.84 | 0.0000 |

|                   |        |        |        |                   |        |        |        |
|-------------------|--------|--------|--------|-------------------|--------|--------|--------|
| Excited State 17: | 4.5564 | 272.11 | 0.1188 | Excited State 8:  | 3.5965 | 344.74 | 0.0000 |
| Excited State 18: | 4.7295 | 262.15 | 0.0779 | Excited State 9:  | 3.6540 | 339.31 | 0.0000 |
| Excited State 19: | 4.8754 | 254.30 | 0.0198 | Excited State 11: | 3.7526 | 330.40 | 0.0000 |
| Excited State 20: | 4.9593 | 250.01 | 0.0179 | Excited State 13: | 4.0247 | 308.06 | 0.0000 |

1-D-13-A-1P234-OPA-DMSO

| Singlets          |        |        |        | Triplets          |        |        |        |
|-------------------|--------|--------|--------|-------------------|--------|--------|--------|
|                   | Ex.En  | WL     | OS     |                   | Ex.En  | WL     | OS     |
| Excited State 5:  | 3.3844 | 366.34 | 0.1069 | Excited State 1:  | 2.1400 | 579.37 | 0.0000 |
| Excited State 10: | 3.7178 | 333.49 | 0.0712 | Excited State 2:  | 2.6350 | 470.53 | 0.0000 |
| Excited State 12: | 3.8707 | 320.31 | 0.0024 | Excited State 3:  | 3.2044 | 386.92 | 0.0000 |
| Excited State 14: | 4.0324 | 307.47 | 0.2273 | Excited State 4:  | 3.3036 | 375.30 | 0.0000 |
| Excited State 15: | 4.2706 | 290.32 | 0.5248 | Excited State 6:  | 3.4615 | 358.18 | 0.0000 |
| Excited State 16: | 4.3666 | 283.94 | 0.2291 | Excited State 7:  | 3.4703 | 357.27 | 0.0000 |
| Excited State 17: | 4.5512 | 272.42 | 0.1257 | Excited State 8:  | 3.5887 | 345.49 | 0.0000 |
| Excited State 18: | 4.7223 | 262.55 | 0.0769 | Excited State 9:  | 3.6519 | 339.51 | 0.0000 |
| Excited State 19: | 4.8778 | 254.18 | 0.0188 | Excited State 11: | 3.7526 | 330.39 | 0.0000 |
| Excited State 20: | 4.9638 | 249.77 | 0.0181 | Excited State 13: | 4.0212 | 308.32 | 0.0000 |

1-D-13-A-1P234-OPA

| Singlets          |        |        |        | Triplets         |        |        |        |
|-------------------|--------|--------|--------|------------------|--------|--------|--------|
|                   | Ex.En  | WL     | OS     |                  | Ex.En  | WL     | OS     |
| Excited State 6:  | 3.4604 | 358.29 | 0.0737 | Excited State 1: | 2.1347 | 580.80 | 0.0000 |
| Excited State 10: | 3.7493 | 330.69 | 0.0434 | Excited State 2: | 2.6613 | 465.89 | 0.0000 |
| Excited State 12: | 3.9123 | 316.91 | 0.0013 | Excited State 3: | 3.2053 | 386.82 | 0.0000 |
| Excited State 14: | 4.0833 | 303.64 | 0.2035 | Excited State 4: | 3.3490 | 370.21 | 0.0000 |
| Excited State 15: | 4.3280 | 286.47 | 0.3504 | Excited State 5: | 3.4516 | 359.21 | 0.0000 |
| Excited State 16: | 4.4116 | 281.04 | 0.1322 | Excited State 7: | 3.4791 | 356.37 | 0.0000 |
| Excited State 17: | 4.5893 | 270.16 | 0.0972 | Excited State 8: | 3.6105 | 343.40 | 0.0000 |
| Excited State 18: | 4.7664 | 260.12 | 0.0701 | Excited State 9: | 3.6745 | 337.42 | 0.0000 |

Excited State 19: 4.8744 254.36 0.0170 Excited State 11: 3.7591 329.82 0.0000  
 Excited State 20: 4.9626 249.84 0.0034 Excited State 13: 4.0306 307.61 0.0000

1-D-13-A-1P234-OPA-n-hexane

| Singlets          |        |        |        | Triplets          |        |        |        |
|-------------------|--------|--------|--------|-------------------|--------|--------|--------|
|                   | Ex.En  | WL     | OS     |                   | Ex.En  | WL     | OS     |
| Excited State 5:  | 3.4265 | 361.84 | 0.1051 | Excited State 1:  | 2.1364 | 580.33 | 0.0000 |
| Excited State 10: | 3.7333 | 332.10 | 0.0695 | Excited State 2:  | 2.6541 | 467.14 | 0.0000 |
| Excited State 12: | 3.8946 | 318.35 | 0.0015 | Excited State 3:  | 3.2059 | 386.74 | 0.0000 |
| Excited State 14: | 4.0496 | 306.16 | 0.3192 | Excited State 4:  | 3.3361 | 371.64 | 0.0000 |
| Excited State 15: | 4.2837 | 289.43 | 0.4525 | Excited State 6:  | 3.4550 | 358.86 | 0.0000 |
| Excited State 16: | 4.3741 | 283.45 | 0.2010 | Excited State 7:  | 3.4791 | 356.37 | 0.0000 |
| Excited State 17: | 4.5663 | 271.52 | 0.1042 | Excited State 8:  | 3.6080 | 343.64 | 0.0000 |
| Excited State 18: | 4.7473 | 261.17 | 0.0800 | Excited State 9:  | 3.6658 | 338.22 | 0.0000 |
| Excited State 19: | 4.8696 | 254.61 | 0.0228 | Excited State 11: | 3.7553 | 330.16 | 0.0000 |
| Excited State 20: | 4.9464 | 250.66 | 0.0102 | Excited State 13: | 4.0300 | 307.66 | 0.0000 |

1-A-13-D-P1234-OPA-CCl4

| Singlets          |        |        |        | Triplets          |        |         |        |
|-------------------|--------|--------|--------|-------------------|--------|---------|--------|
|                   | Ex.En  | WL     | OS     |                   | Ex.En  | WL      | OS     |
| Excited State 5:  | 2.7437 | 451.89 | 0.0696 | Excited State 1:  | 1.2037 | 1029.99 | 0.0000 |
| Excited State 6:  | 2.8552 | 434.24 | 0.0078 | Excited State 2:  | 2.2413 | 553.17  | 0.0000 |
| Excited State 11: | 3.4968 | 354.57 | 0.1956 | Excited State 3:  | 2.5241 | 491.19  | 0.0000 |
| Excited State 13: | 3.6650 | 338.29 | 0.0797 | Excited State 4:  | 2.7314 | 453.92  | 0.0000 |
| Excited State 15: | 3.7930 | 326.88 | 0.4029 | Excited State 7:  | 2.9599 | 418.88  | 0.0000 |
| Excited State 16: | 3.9170 | 316.53 | 0.1084 | Excited State 8:  | 3.1916 | 388.47  | 0.0000 |
| Excited State 17: | 4.2355 | 292.73 | 0.0736 | Excited State 9:  | 3.4526 | 359.10  | 0.0000 |
| Excited State 18: | 4.3196 | 287.03 | 0.0742 | Excited State 10: | 3.4620 | 358.13  | 0.0000 |
| Excited State 19: | 4.4762 | 276.99 | 0.0704 | Excited State 12: | 3.5596 | 348.31  | 0.0000 |
| Excited State 20: | 4.7617 | 260.38 | 0.3665 | Excited State 14: | 3.7497 | 330.65  | 0.0000 |



|                   | Ex.En  | WL     | OS     |                   | Ex.En  | WL      | OS     |
|-------------------|--------|--------|--------|-------------------|--------|---------|--------|
| Excited State 5:  | 2.7773 | 446.43 | 0.0472 | Excited State 1:  | 1.1905 | 1041.47 | 0.0000 |
| Excited State 6:  | 2.8780 | 430.80 | 0.0062 | Excited State 2:  | 2.2477 | 551.60  | 0.0000 |
| Excited State 11: | 3.5332 | 350.91 | 0.0816 | Excited State 3:  | 2.5287 | 490.30  | 0.0000 |
| Excited State 13: | 3.6858 | 336.39 | 0.0511 | Excited State 4:  | 2.7441 | 451.83  | 0.0000 |
| Excited State 15: | 3.8429 | 322.63 | 0.3046 | Excited State 7:  | 2.9637 | 418.35  | 0.0000 |
| Excited State 16: | 3.9411 | 314.59 | 0.1353 | Excited State 8:  | 3.1953 | 388.02  | 0.0000 |
| Excited State 17: | 4.2596 | 291.07 | 0.0587 | Excited State 9:  | 3.4467 | 359.72  | 0.0000 |
| Excited State 18: | 4.3525 | 284.86 | 0.0462 | Excited State 10: | 3.4541 | 358.95  | 0.0000 |
| Excited State 19: | 4.4933 | 275.93 | 0.0674 | Excited State 12: | 3.5771 | 346.60  | 0.0000 |
| Excited State 20: | 4.7861 | 259.05 | 0.0150 | Excited State 14: | 3.7498 | 330.64  | 0.0000 |

1-A-13-D-P1234-OPA-n-hexane

| Singlets          |        |        |        | Triplets          |        |         |        |
|-------------------|--------|--------|--------|-------------------|--------|---------|--------|
|                   | Ex.En  | WL     | OS     |                   | Ex.En  | WL      | OS     |
| Excited State 5:  | 2.7492 | 450.98 | 0.0661 | Excited State 1:  | 1.2014 | 1031.98 | 0.0000 |
| Excited State 6:  | 2.8595 | 433.59 | 0.0076 | Excited State 2:  | 2.2428 | 552.82  | 0.0000 |
| Excited State 11: | 3.5033 | 353.90 | 0.1738 | Excited State 3:  | 2.5248 | 491.06  | 0.0000 |
| Excited State 13: | 3.6682 | 338.00 | 0.0764 | Excited State 4:  | 2.7337 | 453.54  | 0.0000 |
| Excited State 15: | 3.7997 | 326.30 | 0.3939 | Excited State 7:  | 2.9607 | 418.76  | 0.0000 |
| Excited State 16: | 3.9200 | 316.28 | 0.1104 | Excited State 8:  | 3.1922 | 388.40  | 0.0000 |
| Excited State 17: | 4.2396 | 292.44 | 0.0711 | Excited State 9:  | 3.4515 | 359.22  | 0.0000 |
| Excited State 18: | 4.3246 | 286.69 | 0.0690 | Excited State 10: | 3.4606 | 358.27  | 0.0000 |
| Excited State 19: | 4.4788 | 276.82 | 0.0707 | Excited State 12: | 3.5630 | 347.98  | 0.0000 |
| Excited State 20: | 4.7707 | 259.89 | 0.3115 | Excited State 14: | 3.7501 | 330.62  | 0.0000 |

1P234-geo-opt-abs-CCl4

| Singlets         |        |        |        | Triplets         |        |        |        |
|------------------|--------|--------|--------|------------------|--------|--------|--------|
|                  | Ex.En  | WL     | OS     |                  | Ex.En  | WL     | OS     |
| Excited State 8: | 3.8370 | 323.13 | 0.0694 | Excited State 1: | 2.2635 | 547.75 | 0.0000 |

|                   |        |        |        |                   |        |        |        |
|-------------------|--------|--------|--------|-------------------|--------|--------|--------|
| Excited State 9:  | 3.9369 | 314.93 | 0.1088 | Excited State 2:  | 2.9789 | 416.21 | 0.0000 |
| Excited State 12: | 4.3018 | 288.22 | 0.9589 | Excited State 3:  | 3.3695 | 367.96 | 0.0000 |
| Excited State 14: | 4.5017 | 275.42 | 0.0966 | Excited State 4:  | 3.4566 | 358.68 | 0.0000 |
| Excited State 15: | 4.6709 | 265.44 | 0.0700 | Excited State 5:  | 3.5615 | 348.12 | 0.0000 |
| Excited State 16: | 4.9122 | 252.40 | 0.1292 | Excited State 6:  | 3.7060 | 334.55 | 0.0000 |
| Excited State 17: | 5.0541 | 245.31 | 0.0435 | Excited State 7:  | 3.7624 | 329.53 | 0.0000 |
| Excited State 18: | 5.1154 | 242.37 | 0.0888 | Excited State 10: | 4.0314 | 307.54 | 0.0000 |
| Excited State 19: | 5.1517 | 240.67 | 0.0523 | Excited State 11: | 4.2144 | 294.19 | 0.0000 |
| Excited State 20: | 5.2612 | 235.66 | 0.1396 | Excited State 13: | 4.3246 | 286.69 | 0.0000 |

1P234-geo-opt-abs-DCM

| Singlets          |        |        |        | Triplets          |        |        |        |
|-------------------|--------|--------|--------|-------------------|--------|--------|--------|
|                   | Ex.En  | WL     | OS     |                   | Ex.En  | WL     | OS     |
| Excited State 8:  | 3.8381 | 323.04 | 0.0676 | Excited State 1:  | 2.2672 | 546.86 | 0.0000 |
| Excited State 9:  | 3.9394 | 314.73 | 0.1058 | Excited State 2:  | 2.9813 | 415.88 | 0.0000 |
| Excited State 12: | 4.3107 | 287.62 | 0.9441 | Excited State 3:  | 3.3709 | 367.81 | 0.0000 |
| Excited State 14: | 4.5063 | 275.14 | 0.0937 | Excited State 4:  | 3.4616 | 358.17 | 0.0000 |
| Excited State 15: | 4.6751 | 265.20 | 0.0673 | Excited State 5:  | 3.5630 | 347.98 | 0.0000 |
| Excited State 16: | 4.9152 | 252.25 | 0.1309 | Excited State 6:  | 3.7110 | 334.10 | 0.0000 |
| Excited State 17: | 5.0817 | 243.98 | 0.0432 | Excited State 7:  | 3.7647 | 329.33 | 0.0000 |
| Excited State 18: | 5.1201 | 242.15 | 0.0906 | Excited State 10: | 4.0365 | 307.16 | 0.0000 |
| Excited State 19: | 5.1623 | 240.17 | 0.0456 | Excited State 11: | 4.2176 | 293.97 | 0.0000 |
| Excited State 20: | 5.2788 | 234.87 | 0.1513 | Excited State 13: | 4.3273 | 286.51 | 0.0000 |

1P234-geo-opt-abs-DMSO

| Singlets          |        |        |        | Triplets         |        |        |        |
|-------------------|--------|--------|--------|------------------|--------|--------|--------|
|                   | Ex.En  | WL     | OS     |                  | Ex.En  | WL     | OS     |
| Excited State 8:  | 3.8381 | 323.03 | 0.0675 | Excited State 1: | 2.2687 | 546.50 | 0.0000 |
| Excited State 9:  | 3.9403 | 314.66 | 0.1048 | Excited State 2: | 2.9822 | 415.75 | 0.0000 |
| Excited State 12: | 4.3131 | 287.46 | 0.9415 | Excited State 3: | 3.3712 | 367.77 | 0.0000 |

|                   |        |        |        |                   |        |        |        |
|-------------------|--------|--------|--------|-------------------|--------|--------|--------|
| Excited State 14: | 4.5077 | 275.05 | 0.0927 | Excited State 4:  | 3.4636 | 357.96 | 0.0000 |
| Excited State 15: | 4.6759 | 265.16 | 0.0667 | Excited State 5:  | 3.5635 | 347.93 | 0.0000 |
| Excited State 16: | 4.9162 | 252.19 | 0.1320 | Excited State 6:  | 3.7131 | 333.91 | 0.0000 |
| Excited State 17: | 5.0924 | 243.47 | 0.0434 | Excited State 7:  | 3.7656 | 329.26 | 0.0000 |
| Excited State 18: | 5.1215 | 242.09 | 0.0907 | Excited State 10: | 4.0380 | 307.04 | 0.0000 |
| Excited State 19: | 5.1656 | 240.02 | 0.0435 | Excited State 11: | 4.2189 | 293.88 | 0.0000 |
| Excited State 20: | 5.2856 | 234.57 | 0.1577 | Excited State 13: | 4.3283 | 286.45 | 0.0000 |

1P234-geo-opt-abs

| Singlets          |        |        |        | Triplets          |        |        |        |
|-------------------|--------|--------|--------|-------------------|--------|--------|--------|
|                   | Ex.En  | WL     | OS     |                   | Ex.En  | WL     | OS     |
| Excited State 8:  | 3.8494 | 322.08 | 0.0296 | Excited State 1:  | 2.2604 | 548.50 | 0.0000 |
| Excited State 9:  | 3.9610 | 313.01 | 0.0822 | Excited State 2:  | 2.9765 | 416.54 | 0.0000 |
| Excited State 13: | 4.3863 | 282.66 | 0.6321 | Excited State 3:  | 3.3677 | 368.16 | 0.0000 |
| Excited State 14: | 4.5228 | 274.13 | 0.1265 | Excited State 4:  | 3.4523 | 359.14 | 0.0000 |
| Excited State 15: | 4.7041 | 263.57 | 0.0432 | Excited State 5:  | 3.5597 | 348.30 | 0.0000 |
| Excited State 16: | 4.9243 | 251.78 | 0.0951 | Excited State 6:  | 3.7018 | 334.93 | 0.0000 |
| Excited State 17: | 5.0396 | 246.02 | 0.0242 | Excited State 7:  | 3.7603 | 329.72 | 0.0000 |
| Excited State 18: | 5.1475 | 240.86 | 0.0534 | Excited State 10: | 4.0256 | 307.99 | 0.0000 |
| Excited State 19: | 5.1849 | 239.13 | 0.0415 | Excited State 11: | 4.2119 | 294.36 | 0.0000 |
| Excited State 20: | 5.2607 | 235.68 | 0.0880 | Excited State 12: | 4.3220 | 286.87 | 0.0000 |

1P234-geo-opt-abs-n-hexane

| Singlets          |        |        |        | Triplets         |        |        |        |
|-------------------|--------|--------|--------|------------------|--------|--------|--------|
|                   | Ex.En  | WL     | OS     |                  | Ex.En  | WL     | OS     |
| Excited State 8:  | 3.8391 | 322.95 | 0.0616 | Excited State 1: | 2.2629 | 547.90 | 0.0000 |
| Excited State 9:  | 3.9401 | 314.67 | 0.1058 | Excited State 2: | 2.9784 | 416.28 | 0.0000 |
| Excited State 12: | 4.3138 | 287.41 | 0.9152 | Excited State 3: | 3.3692 | 368.00 | 0.0000 |
| Excited State 14: | 4.5042 | 275.26 | 0.0974 | Excited State 4: | 3.4558 | 358.77 | 0.0000 |
| Excited State 15: | 4.6757 | 265.17 | 0.0655 | Excited State 5: | 3.5612 | 348.16 | 0.0000 |

|                   |        |        |        |                   |        |        |        |
|-------------------|--------|--------|--------|-------------------|--------|--------|--------|
| Excited State 16: | 4.9138 | 252.32 | 0.1236 | Excited State 6:  | 3.7052 | 334.63 | 0.0000 |
| Excited State 17: | 5.0510 | 245.46 | 0.0393 | Excited State 7:  | 3.7620 | 329.57 | 0.0000 |
| Excited State 18: | 5.1203 | 242.14 | 0.0837 | Excited State 10: | 4.0304 | 307.62 | 0.0000 |
| Excited State 19: | 5.1560 | 240.46 | 0.0514 | Excited State 11: | 4.2139 | 294.23 | 0.0000 |
| Excited State 20: | 5.2604 | 235.70 | 0.1303 | Excited State 13: | 4.3241 | 286.73 | 0.0000 |

2-D-10-A-12P34-OPA-CC14

| Singlets          |        |        |        | Triplets          |        |        |        |
|-------------------|--------|--------|--------|-------------------|--------|--------|--------|
|                   | Ex.En  | WL     | OS     |                   | Ex.En  | WL     | OS     |
| Excited State 4:  | 3.2043 | 386.93 | 0.2750 | Excited State 1:  | 1.9451 | 637.41 | 0.0000 |
| Excited State 9:  | 3.7054 | 334.61 | 0.0842 | Excited State 2:  | 2.4760 | 500.74 | 0.0000 |
| Excited State 12: | 4.0057 | 309.52 | 0.1686 | Excited State 3:  | 3.1513 | 393.43 | 0.0000 |
| Excited State 13: | 4.0686 | 304.73 | 0.0640 | Excited State 5:  | 3.3272 | 372.64 | 0.0000 |
| Excited State 15: | 4.1917 | 295.79 | 0.0236 | Excited State 6:  | 3.4541 | 358.94 | 0.0000 |
| Excited State 16: | 4.4506 | 278.58 | 0.1738 | Excited State 7:  | 3.5415 | 350.09 | 0.0000 |
| Excited State 17: | 4.6115 | 268.86 | 0.2999 | Excited State 8:  | 3.5869 | 345.66 | 0.0000 |
| Excited State 18: | 4.8086 | 257.84 | 0.0636 | Excited State 10: | 3.8282 | 323.87 | 0.0000 |
| Excited State 19: | 4.9165 | 252.18 | 0.8793 | Excited State 11: | 3.8579 | 321.37 | 0.0000 |
| Excited State 20: | 4.9686 | 249.54 | 0.0125 | Excited State 14: | 4.0776 | 304.06 | 0.0000 |

2-D-10-A-12P34-OPA-DCM

| Singlets          |        |        |        | Triplets         |        |        |        |
|-------------------|--------|--------|--------|------------------|--------|--------|--------|
|                   | Ex.En  | WL     | OS     |                  | Ex.En  | WL     | OS     |
| Excited State 4:  | 3.1691 | 391.23 | 0.2598 | Excited State 1: | 1.9442 | 637.73 | 0.0000 |
| Excited State 9:  | 3.6835 | 336.59 | 0.0796 | Excited State 2: | 2.4756 | 500.83 | 0.0000 |
| Excited State 12: | 3.9734 | 312.03 | 0.1897 | Excited State 3: | 3.1307 | 396.03 | 0.0000 |
| Excited State 13: | 4.0609 | 305.31 | 0.0564 | Excited State 5: | 3.3113 | 374.42 | 0.0000 |
| Excited State 15: | 4.1865 | 296.15 | 0.0194 | Excited State 6: | 3.4578 | 358.56 | 0.0000 |
| Excited State 16: | 4.4416 | 279.14 | 0.1591 | Excited State 7: | 3.5120 | 353.03 | 0.0000 |
| Excited State 17: | 4.5986 | 269.61 | 0.2837 | Excited State 8: | 3.5765 | 346.67 | 0.0000 |

Excited State 18: 4.8064 257.96 0.0800 Excited State 10: 3.8268 323.99 0.0000  
 Excited State 19: 4.9026 252.90 0.7876 Excited State 11: 3.8372 323.11 0.0000  
 Excited State 20: 4.9577 250.08 0.0023 Excited State 14: 4.0672 304.84 0.0000

2-D-10-A-12P34-OPA-DMSO

| Singlets          |        |        |        | Triplets          |        |        |        |
|-------------------|--------|--------|--------|-------------------|--------|--------|--------|
|                   | Ex.En  | WL     | OS     |                   | Ex.En  | WL     | OS     |
| Excited State 4:  | 3.1529 | 393.23 | 0.2641 | Excited State 1:  | 1.9439 | 637.81 | 0.0000 |
| Excited State 9:  | 3.6733 | 337.52 | 0.0810 | Excited State 2:  | 2.4751 | 500.93 | 0.0000 |
| Excited State 12: | 3.9602 | 313.08 | 0.2022 | Excited State 3:  | 3.1222 | 397.11 | 0.0000 |
| Excited State 13: | 4.0587 | 305.48 | 0.0586 | Excited State 5:  | 3.3056 | 375.08 | 0.0000 |
| Excited State 15: | 4.1830 | 296.40 | 0.0189 | Excited State 6:  | 3.4591 | 358.43 | 0.0000 |
| Excited State 16: | 4.4354 | 279.53 | 0.1603 | Excited State 7:  | 3.5002 | 354.22 | 0.0000 |
| Excited State 17: | 4.5892 | 270.17 | 0.3024 | Excited State 8:  | 3.5739 | 346.91 | 0.0000 |
| Excited State 18: | 4.8030 | 258.14 | 0.1085 | Excited State 10: | 3.8184 | 324.70 | 0.0000 |
| Excited State 19: | 4.8917 | 253.46 | 0.7580 | Excited State 11: | 3.8400 | 322.87 | 0.0000 |
| Excited State 20: | 4.9536 | 250.29 | 0.0042 | Excited State 14: | 4.0655 | 304.97 | 0.0000 |

2-D-10-A-12P34-OPA

| Singlets          |        |        |        | Triplets          |        |        |        |
|-------------------|--------|--------|--------|-------------------|--------|--------|--------|
|                   | Ex.En  | WL     | OS     |                   | Ex.En  | WL     | OS     |
| Excited State 4:  | 3.2861 | 377.30 | 0.2048 | Excited State 1:  | 1.9476 | 636.59 | 0.0000 |
| Excited State 9:  | 3.7544 | 330.24 | 0.0532 | Excited State 2:  | 2.4765 | 500.63 | 0.0000 |
| Excited State 12: | 4.0521 | 305.97 | 0.0603 | Excited State 3:  | 3.1720 | 390.88 | 0.0000 |
| Excited State 14: | 4.1082 | 301.80 | 0.0765 | Excited State 5:  | 3.3431 | 370.87 | 0.0000 |
| Excited State 15: | 4.2218 | 293.67 | 0.0175 | Excited State 6:  | 3.4508 | 359.29 | 0.0000 |
| Excited State 16: | 4.4989 | 275.59 | 0.1227 | Excited State 7:  | 3.5699 | 347.30 | 0.0000 |
| Excited State 17: | 4.6818 | 264.82 | 0.1855 | Excited State 8:  | 3.6027 | 344.14 | 0.0000 |
| Excited State 18: | 4.8331 | 256.53 | 0.0345 | Excited State 10: | 3.8263 | 324.03 | 0.0000 |
| Excited State 19: | 4.9792 | 249.01 | 0.0645 | Excited State 11: | 3.8929 | 318.48 | 0.0000 |

Excited State 20: 5.0099 247.48 0.5014 Excited State 13: 4.0975 302.59 0.0000

2-D-10-A-12P34-OPA-n-hexane

| Singlets          |        |        |        | Triplets          |        |        |        |
|-------------------|--------|--------|--------|-------------------|--------|--------|--------|
|                   | Ex.En  | WL     | OS     |                   | Ex.En  | WL     | OS     |
| Excited State 4:  | 3.2171 | 385.39 | 0.2650 | Excited State 1:  | 1.9455 | 637.29 | 0.0000 |
| Excited State 9:  | 3.7135 | 333.88 | 0.0794 | Excited State 2:  | 2.4762 | 500.70 | 0.0000 |
| Excited State 12: | 4.0150 | 308.80 | 0.1506 | Excited State 3:  | 3.1552 | 392.96 | 0.0000 |
| Excited State 13: | 4.0734 | 304.37 | 0.0654 | Excited State 5:  | 3.3302 | 372.30 | 0.0000 |
| Excited State 15: | 4.1961 | 295.47 | 0.0230 | Excited State 6:  | 3.4535 | 359.01 | 0.0000 |
| Excited State 16: | 4.4580 | 278.11 | 0.1673 | Excited State 7:  | 3.5469 | 349.56 | 0.0000 |
| Excited State 17: | 4.6221 | 268.24 | 0.2788 | Excited State 8:  | 3.5895 | 345.41 | 0.0000 |
| Excited State 18: | 4.8123 | 257.64 | 0.0550 | Excited State 10: | 3.8275 | 323.93 | 0.0000 |
| Excited State 19: | 4.9299 | 251.50 | 0.8332 | Excited State 11: | 3.8640 | 320.87 | 0.0000 |
| Excited State 20: | 4.9717 | 249.38 | 0.0223 | Excited State 14: | 4.0805 | 303.84 | 0.0000 |

3-A-12-D-P1234-OPA-CCl4

| Singlets          |        |        |        | Triplets          |        |         |        |
|-------------------|--------|--------|--------|-------------------|--------|---------|--------|
|                   | Ex.En  | WL     | OS     |                   | Ex.En  | WL      | OS     |
| Excited State 4:  | 2.6665 | 464.97 | 0.0924 | Excited State 1:  | 1.1393 | 1088.21 | 0.0000 |
| Excited State 6:  | 2.9420 | 421.43 | 0.0209 | Excited State 2:  | 2.3225 | 533.84  | 0.0000 |
| Excited State 9:  | 3.3883 | 365.92 | 0.2391 | Excited State 3:  | 2.4508 | 505.88  | 0.0000 |
| Excited State 12: | 3.5764 | 346.67 | 0.3440 | Excited State 5:  | 2.6899 | 460.92  | 0.0000 |
| Excited State 15: | 4.0700 | 304.63 | 0.1157 | Excited State 7:  | 3.1221 | 397.11  | 0.0000 |
| Excited State 16: | 4.1930 | 295.69 | 0.2571 | Excited State 8:  | 3.2449 | 382.09  | 0.0000 |
| Excited State 17: | 4.2377 | 292.57 | 0.1698 | Excited State 10: | 3.4531 | 359.05  | 0.0000 |
| Excited State 18: | 4.4885 | 276.23 | 0.0647 | Excited State 11: | 3.4882 | 355.44  | 0.0000 |
| Excited State 19: | 4.6665 | 265.69 | 0.7803 | Excited State 13: | 3.5835 | 345.98  | 0.0000 |
| Excited State 20: | 4.7205 | 262.65 | 0.0656 | Excited State 14: | 3.7021 | 334.90  | 0.0000 |

3-A-12-D-P1234-OPA-DCM

| Singlets          |        |        |        | Triplets          |        |         |        |
|-------------------|--------|--------|--------|-------------------|--------|---------|--------|
|                   | Ex.En  | WL     | OS     |                   | Ex.En  | WL      | OS     |
| Excited State 4:  | 2.6415 | 469.38 | 0.0843 | Excited State 1:  | 1.1527 | 1075.56 | 0.0000 |
| Excited State 6:  | 2.9138 | 425.50 | 0.0286 | Excited State 2:  | 2.3146 | 535.66  | 0.0000 |
| Excited State 9:  | 3.3666 | 368.28 | 0.2398 | Excited State 3:  | 2.4258 | 511.10  | 0.0000 |
| Excited State 13: | 3.5604 | 348.23 | 0.3199 | Excited State 5:  | 2.6704 | 464.28  | 0.0000 |
| Excited State 15: | 4.0636 | 305.11 | 0.1036 | Excited State 7:  | 3.1075 | 398.98  | 0.0000 |
| Excited State 16: | 4.1789 | 296.69 | 0.2780 | Excited State 8:  | 3.2351 | 383.24  | 0.0000 |
| Excited State 17: | 4.2289 | 293.18 | 0.1711 | Excited State 10: | 3.4595 | 358.39  | 0.0000 |
| Excited State 18: | 4.4702 | 277.36 | 0.0599 | Excited State 11: | 3.4838 | 355.88  | 0.0000 |
| Excited State 19: | 4.6642 | 265.82 | 0.7593 | Excited State 12: | 3.5581 | 348.46  | 0.0000 |
| Excited State 20: | 4.7184 | 262.77 | 0.0505 | Excited State 14: | 3.6953 | 335.52  | 0.0000 |

3-A-12-D-P1234-OPA-DMSO

| Singlets          |        |        |        | Triplets          |        |         |        |
|-------------------|--------|--------|--------|-------------------|--------|---------|--------|
|                   | Ex.En  | WL     | OS     |                   | Ex.En  | WL      | OS     |
| Excited State 4:  | 2.6323 | 471.01 | 0.0819 | Excited State 1:  | 1.1568 | 1071.77 | 0.0000 |
| Excited State 6:  | 2.9062 | 426.63 | 0.0315 | Excited State 2:  | 2.3117 | 536.33  | 0.0000 |
| Excited State 9:  | 3.3595 | 369.06 | 0.2409 | Excited State 3:  | 2.4180 | 512.76  | 0.0000 |
| Excited State 13: | 3.5545 | 348.81 | 0.3128 | Excited State 5:  | 2.6642 | 465.37  | 0.0000 |
| Excited State 15: | 4.0609 | 305.31 | 0.1000 | Excited State 7:  | 3.1029 | 399.57  | 0.0000 |
| Excited State 16: | 4.1740 | 297.04 | 0.2846 | Excited State 8:  | 3.2319 | 383.63  | 0.0000 |
| Excited State 17: | 4.2267 | 293.34 | 0.1730 | Excited State 10: | 3.4620 | 358.13  | 0.0000 |
| Excited State 18: | 4.4635 | 277.77 | 0.0575 | Excited State 11: | 3.4820 | 356.08  | 0.0000 |
| Excited State 19: | 4.6624 | 265.92 | 0.7472 | Excited State 12: | 3.5503 | 349.22  | 0.0000 |
| Excited State 20: | 4.7180 | 262.79 | 0.0531 | Excited State 14: | 3.6947 | 335.57  | 0.0000 |

3-A-12-D-P1234-OPA

| Singlets |    |    | Triplets |    |    |
|----------|----|----|----------|----|----|
| Ex.En    | WL | OS | Ex.En    | WL | OS |

|                   |        |        |        |                   |        |         |        |
|-------------------|--------|--------|--------|-------------------|--------|---------|--------|
| Excited State 5:  | 2.7210 | 455.65 | 0.0671 | Excited State 1:  | 1.1228 | 1104.21 | 0.0000 |
| Excited State 6:  | 2.9950 | 413.97 | 0.0118 | Excited State 2:  | 2.3301 | 532.10  | 0.0000 |
| Excited State 9:  | 3.4454 | 359.85 | 0.1181 | Excited State 3:  | 2.4813 | 499.67  | 0.0000 |
| Excited State 13: | 3.6527 | 339.43 | 0.3185 | Excited State 4:  | 2.7132 | 456.97  | 0.0000 |
| Excited State 15: | 4.0992 | 302.46 | 0.0933 | Excited State 7:  | 3.1390 | 394.98  | 0.0000 |
| Excited State 16: | 4.2462 | 291.99 | 0.1038 | Excited State 8:  | 3.2564 | 380.74  | 0.0000 |
| Excited State 17: | 4.2834 | 289.46 | 0.1459 | Excited State 10: | 3.4473 | 359.66  | 0.0000 |
| Excited State 18: | 4.5272 | 273.86 | 0.0373 | Excited State 11: | 3.4904 | 355.21  | 0.0000 |
| Excited State 19: | 4.7232 | 262.50 | 0.1251 | Excited State 12: | 3.6123 | 343.23  | 0.0000 |
| Excited State 20: | 4.7800 | 259.38 | 0.4510 | Excited State 14: | 3.7222 | 333.09  | 0.0000 |

3-A-12-D-P1234-OPA-n-hexane

| Singlets          |        |        |        | Triplets          |        |         |        |
|-------------------|--------|--------|--------|-------------------|--------|---------|--------|
|                   | Ex.En  | WL     | OS     |                   | Ex.En  | WL      | OS     |
| Excited State 4:  | 2.6754 | 463.42 | 0.0888 | Excited State 1:  | 1.1364 | 1090.98 | 0.0000 |
| Excited State 6:  | 2.9505 | 420.22 | 0.0190 | Excited State 2:  | 2.3239 | 533.51  | 0.0000 |
| Excited State 9:  | 3.3981 | 364.87 | 0.2183 | Excited State 3:  | 2.4561 | 504.80  | 0.0000 |
| Excited State 12: | 3.5870 | 345.64 | 0.3439 | Excited State 5:  | 2.6939 | 460.24  | 0.0000 |
| Excited State 15: | 4.0746 | 304.29 | 0.1126 | Excited State 7:  | 3.1252 | 396.73  | 0.0000 |
| Excited State 16: | 4.2028 | 295.00 | 0.2253 | Excited State 8:  | 3.2469 | 381.86  | 0.0000 |
| Excited State 17: | 4.2438 | 292.15 | 0.1696 | Excited State 10: | 3.4520 | 359.17  | 0.0000 |
| Excited State 18: | 4.4946 | 275.85 | 0.0587 | Excited State 11: | 3.4888 | 355.38  | 0.0000 |
| Excited State 19: | 4.6802 | 264.91 | 0.7298 | Excited State 13: | 3.5888 | 345.48  | 0.0000 |
| Excited State 20: | 4.7239 | 262.46 | 0.0926 | Excited State 14: | 3.7046 | 334.68  | 0.0000 |

2-D-12-A-12P34-OPA-CCl4

| Singlets          |        |        |        | Triplets         |        |        |        |
|-------------------|--------|--------|--------|------------------|--------|--------|--------|
|                   | Ex.En  | WL     | OS     |                  | Ex.En  | WL     | OS     |
| Excited State 3:  | 3.1456 | 394.15 | 0.2336 | Excited State 1: | 1.9479 | 636.50 | 0.0000 |
| Excited State 10: | 3.7018 | 334.93 | 0.1099 | Excited State 2: | 2.5184 | 492.31 | 0.0000 |

|                   |        |        |        |                   |        |        |        |
|-------------------|--------|--------|--------|-------------------|--------|--------|--------|
| Excited State 11: | 3.9290 | 315.56 | 0.0472 | Excited State 4:  | 3.1469 | 393.99 | 0.0000 |
| Excited State 14: | 4.0096 | 309.22 | 0.1037 | Excited State 5:  | 3.3334 | 371.95 | 0.0000 |
| Excited State 16: | 4.2663 | 290.61 | 0.0679 | Excited State 6:  | 3.4237 | 362.13 | 0.0000 |
| Excited State 18: | 4.3974 | 281.95 | 0.2637 | Excited State 7:  | 3.4560 | 358.75 | 0.0000 |
| Excited State 19: | 4.6201 | 268.36 | 0.0991 | Excited State 8:  | 3.5918 | 345.19 | 0.0000 |
| Excited State 20: | 4.7297 | 262.14 | 0.3469 | Excited State 9:  | 3.6737 | 337.49 | 0.0000 |
| Excited State 21: | 4.8597 | 255.13 | 0.0255 | Excited State 12: | 3.9855 | 311.09 | 0.0000 |
| Excited State 22: | 4.9494 | 250.51 | 0.2630 | Excited State 13: | 3.9984 | 310.09 | 0.0000 |
| Excited State 23: | 5.0404 | 245.98 | 0.6446 | Excited State 15: | 4.1653 | 297.66 | 0.0000 |
| Excited State 24: | 5.1004 | 243.09 | 0.2015 | Excited State 17: | 4.2733 | 290.14 | 0.0000 |

2-D-12-A-12P34-OPA-DCM

| Singlets          |        |        |        | Triplets          |        |        |        |
|-------------------|--------|--------|--------|-------------------|--------|--------|--------|
|                   | Ex.En  | WL     | OS     |                   | Ex.En  | WL     | OS     |
| Excited State 3:  | 3.1365 | 395.29 | 0.2253 | Excited State 1:  | 1.9473 | 636.69 | 0.0000 |
| Excited State 10: | 3.6939 | 335.64 | 0.1041 | Excited State 2:  | 2.5175 | 492.50 | 0.0000 |
| Excited State 11: | 3.9273 | 315.70 | 0.0549 | Excited State 4:  | 3.1428 | 394.50 | 0.0000 |
| Excited State 14: | 3.9959 | 310.28 | 0.0951 | Excited State 5:  | 3.3323 | 372.07 | 0.0000 |
| Excited State 15: | 4.2687 | 290.45 | 0.0564 | Excited State 6:  | 3.4109 | 363.50 | 0.0000 |
| Excited State 16: | 4.3951 | 282.09 | 0.2698 | Excited State 7:  | 3.4604 | 358.29 | 0.0000 |
| Excited State 17: | 4.6209 | 268.31 | 0.0889 | Excited State 8:  | 3.5832 | 346.02 | 0.0000 |
| Excited State 18: | 4.7192 | 262.72 | 0.3443 | Excited State 9:  | 3.6633 | 338.45 | 0.0000 |
| Excited State 19: | 4.8687 | 254.66 | 0.0290 | Excited State 12: | 3.9855 | 311.09 | 0.0000 |
| Excited State 20: | 4.9521 | 250.37 | 0.2775 | Excited State 13: | 3.9947 | 310.37 | 0.0000 |

2-D-12-A-12P34-OPA-DMSO

| Singlets          |        |        |        | Triplets         |        |        |        |
|-------------------|--------|--------|--------|------------------|--------|--------|--------|
|                   | Ex.En  | WL     | OS     |                  | Ex.En  | WL     | OS     |
| Excited State 3:  | 3.1374 | 395.18 | 0.2243 | Excited State 1: | 1.9476 | 636.59 | 0.0000 |
| Excited State 10: | 3.6934 | 335.69 | 0.1021 | Excited State 2: | 2.5171 | 492.56 | 0.0000 |

|                   |        |        |        |                   |        |        |        |
|-------------------|--------|--------|--------|-------------------|--------|--------|--------|
| Excited State 11: | 3.9296 | 315.52 | 0.0563 | Excited State 4:  | 3.1432 | 394.46 | 0.0000 |
| Excited State 13: | 3.9938 | 310.44 | 0.0922 | Excited State 5:  | 3.3335 | 371.93 | 0.0000 |
| Excited State 15: | 4.2706 | 290.32 | 0.0514 | Excited State 6:  | 3.4098 | 363.61 | 0.0000 |
| Excited State 16: | 4.3956 | 282.06 | 0.2768 | Excited State 7:  | 3.4622 | 358.11 | 0.0000 |
| Excited State 17: | 4.6231 | 268.18 | 0.0915 | Excited State 8:  | 3.5809 | 346.24 | 0.0000 |
| Excited State 18: | 4.7171 | 262.84 | 0.3446 | Excited State 9:  | 3.6607 | 338.69 | 0.0000 |
| Excited State 19: | 4.8750 | 254.33 | 0.0345 | Excited State 12: | 3.9865 | 311.01 | 0.0000 |
| Excited State 20: | 4.9556 | 250.19 | 0.2901 | Excited State 14: | 3.9957 | 310.29 | 0.0000 |

2-D-12-A-12P34-OPA

| Singlets          |        |        |        | Triplets          |        |        |        |
|-------------------|--------|--------|--------|-------------------|--------|--------|--------|
|                   | Ex.En  | WL     | OS     |                   | Ex.En  | WL     | OS     |
| Excited State 4:  | 3.2080 | 386.48 | 0.1700 | Excited State 1:  | 1.9490 | 636.13 | 0.0000 |
| Excited State 10: | 3.7429 | 331.26 | 0.0697 | Excited State 2:  | 2.5194 | 492.11 | 0.0000 |
| Excited State 11: | 3.9489 | 313.97 | 0.0185 | Excited State 3:  | 3.1598 | 392.38 | 0.0000 |
| Excited State 14: | 4.0544 | 305.80 | 0.0738 | Excited State 5:  | 3.3406 | 371.14 | 0.0000 |
| Excited State 15: | 4.2949 | 288.68 | 0.0287 | Excited State 6:  | 3.4471 | 359.67 | 0.0000 |
| Excited State 16: | 4.4318 | 279.13 | 0.1720 | Excited State 7:  | 3.4548 | 358.88 | 0.0000 |
| Excited State 17: | 4.6497 | 266.65 | 0.0335 | Excited State 8:  | 3.6007 | 344.33 | 0.0000 |
| Excited State 18: | 4.7965 | 258.49 | 0.1912 | Excited State 9:  | 3.6908 | 335.93 | 0.0000 |
| Excited State 19: | 4.8708 | 254.55 | 0.0350 | Excited State 12: | 3.9869 | 310.98 | 0.0000 |
| Excited State 20: | 4.9805 | 248.94 | 0.1145 | Excited State 13: | 4.0123 | 309.01 | 0.0000 |

2-D-12-A-12P34-OPA-n-hexane

| Singlets          |        |        |        | Triplets         |        |        |        |
|-------------------|--------|--------|--------|------------------|--------|--------|--------|
|                   | Ex.En  | WL     | OS     |                  | Ex.En  | WL     | OS     |
| Excited State 4:  | 3.1545 | 393.04 | 0.2243 | Excited State 1: | 1.9482 | 636.41 | 0.0000 |
| Excited State 10: | 3.7076 | 334.40 | 0.1030 | Excited State 2: | 2.5186 | 492.28 | 0.0000 |
| Excited State 11: | 3.9322 | 315.30 | 0.0413 | Excited State 3: | 3.1483 | 393.81 | 0.0000 |
| Excited State 14: | 4.0159 | 308.74 | 0.1006 | Excited State 5: | 3.3341 | 371.87 | 0.0000 |

|                   |        |        |        |                   |        |        |        |
|-------------------|--------|--------|--------|-------------------|--------|--------|--------|
| Excited State 15: | 4.2704 | 290.34 | 0.0622 | Excited State 6:  | 3.4275 | 361.73 | 0.0000 |
| Excited State 16: | 4.4037 | 281.55 | 0.2471 | Excited State 7:  | 3.4553 | 358.83 | 0.0000 |
| Excited State 17: | 4.6241 | 268.13 | 0.0827 | Excited State 8:  | 3.5937 | 345.00 | 0.0000 |
| Excited State 18: | 4.7410 | 261.51 | 0.3297 | Excited State 9:  | 3.6763 | 337.25 | 0.0000 |
| Excited State 19: | 4.8602 | 255.10 | 0.0261 | Excited State 12: | 3.9855 | 311.09 | 0.0000 |
| Excited State 20: | 4.9534 | 250.30 | 0.2252 | Excited State 13: | 4.0005 | 309.92 | 0.0000 |

3-D-13-A-1P234-OPA-CCl4

| Singlets          |        |        |        | Triplets          |        |        |        |
|-------------------|--------|--------|--------|-------------------|--------|--------|--------|
|                   | Ex.En  | WL     | OS     |                   | Ex.En  | WL     | OS     |
| Excited State 4:  | 3.2541 | 381.01 | 0.2313 | Excited State 1:  | 2.1104 | 587.49 | 0.0000 |
| Excited State 7:  | 3.5193 | 352.30 | 0.1587 | Excited State 2:  | 2.6706 | 464.25 | 0.0000 |
| Excited State 12: | 4.0025 | 309.77 | 0.0490 | Excited State 3:  | 3.0004 | 413.22 | 0.0000 |
| Excited State 14: | 4.1600 | 298.04 | 0.4090 | Excited State 5:  | 3.3272 | 372.64 | 0.0000 |
| Excited State 15: | 4.3396 | 285.71 | 0.0887 | Excited State 6:  | 3.4556 | 358.79 | 0.0000 |
| Excited State 16: | 4.5603 | 271.88 | 0.3197 | Excited State 8:  | 3.5199 | 352.24 | 0.0000 |
| Excited State 17: | 4.6850 | 264.64 | 0.1371 | Excited State 9:  | 3.6305 | 341.51 | 0.0000 |
| Excited State 18: | 4.7417 | 261.48 | 0.3970 | Excited State 10: | 3.6569 | 339.04 | 0.0000 |
| Excited State 19: | 4.8070 | 257.92 | 0.0919 | Excited State 11: | 3.9039 | 317.59 | 0.0000 |
| Excited State 20: | 4.8558 | 255.33 | 0.1483 | Excited State 13: | 4.0366 | 307.15 | 0.0000 |

3-D-13-A-1P234-OPA-DCM

| Singlets          |        |        |        | Triplets         |        |        |        |
|-------------------|--------|--------|--------|------------------|--------|--------|--------|
|                   | Ex.En  | WL     | OS     |                  | Ex.En  | WL     | OS     |
| Excited State 4:  | 3.2415 | 382.49 | 0.2301 | Excited State 1: | 2.1117 | 587.13 | 0.0000 |
| Excited State 8:  | 3.5187 | 352.36 | 0.1571 | Excited State 2: | 2.6642 | 465.37 | 0.0000 |
| Excited State 12: | 3.9875 | 310.93 | 0.0361 | Excited State 3: | 2.9956 | 413.88 | 0.0000 |
| Excited State 14: | 4.1696 | 297.35 | 0.3885 | Excited State 5: | 3.3083 | 374.76 | 0.0000 |
| Excited State 15: | 4.3232 | 286.79 | 0.1038 | Excited State 6: | 3.4592 | 358.42 | 0.0000 |
| Excited State 16: | 4.5542 | 272.24 | 0.3251 | Excited State 7: | 3.4901 | 355.24 | 0.0000 |

|                   |        |        |        |                   |        |        |        |
|-------------------|--------|--------|--------|-------------------|--------|--------|--------|
| Excited State 17: | 4.6751 | 265.20 | 0.1666 | Excited State 9:  | 3.6367 | 340.92 | 0.0000 |
| Excited State 18: | 4.7439 | 261.36 | 0.3631 | Excited State 10: | 3.6688 | 337.95 | 0.0000 |
| Excited State 19: | 4.8051 | 258.03 | 0.0812 | Excited State 11: | 3.9007 | 317.85 | 0.0000 |
| Excited State 20: | 4.8673 | 254.73 | 0.1705 | Excited State 13: | 4.0356 | 307.23 | 0.0000 |

3-D-13-A-1P234-OPA-DMSO

| Singlets          |        |        |        | Triplets          |        |        |        |
|-------------------|--------|--------|--------|-------------------|--------|--------|--------|
|                   | Ex.En  | WL     | OS     |                   | Ex.En  | WL     | OS     |
| Excited State 4:  | 3.2391 | 382.77 | 0.2313 | Excited State 1:  | 2.1125 | 586.90 | 0.0000 |
| Excited State 8:  | 3.5193 | 352.30 | 0.1565 | Excited State 2:  | 2.6623 | 465.70 | 0.0000 |
| Excited State 12: | 3.9805 | 311.48 | 0.0327 | Excited State 3:  | 2.9943 | 414.06 | 0.0000 |
| Excited State 14: | 4.1731 | 297.10 | 0.3820 | Excited State 5:  | 3.2997 | 375.74 | 0.0000 |
| Excited State 15: | 4.3170 | 287.20 | 0.1130 | Excited State 6:  | 3.4595 | 358.39 | 0.0000 |
| Excited State 16: | 4.5519 | 272.38 | 0.3314 | Excited State 7:  | 3.4787 | 356.41 | 0.0000 |
| Excited State 17: | 4.6735 | 265.29 | 0.1777 | Excited State 9:  | 3.6394 | 340.68 | 0.0000 |
| Excited State 18: | 4.7444 | 261.33 | 0.3340 | Excited State 10: | 3.6740 | 337.46 | 0.0000 |
| Excited State 19: | 4.8072 | 257.91 | 0.0881 | Excited State 11: | 3.8994 | 317.96 | 0.0000 |
| Excited State 20: | 4.8749 | 254.33 | 0.1777 | Excited State 13: | 4.0355 | 307.23 | 0.0000 |

3-D-13-A-1P234-OPA

| Singlets          |        |        |        | Triplets          |        |        |        |
|-------------------|--------|--------|--------|-------------------|--------|--------|--------|
|                   | Ex.En  | WL     | OS     |                   | Ex.En  | WL     | OS     |
| Excited State 4:  | 3.3121 | 374.34 | 0.1536 | Excited State 1:  | 2.1117 | 587.14 | 0.0000 |
| Excited State 8:  | 3.5548 | 348.78 | 0.1171 | Excited State 2:  | 2.6801 | 462.61 | 0.0000 |
| Excited State 12: | 4.0336 | 307.38 | 0.0394 | Excited State 3:  | 3.0113 | 411.73 | 0.0000 |
| Excited State 14: | 4.1976 | 295.37 | 0.2868 | Excited State 5:  | 3.3421 | 370.98 | 0.0000 |
| Excited State 15: | 4.3839 | 282.82 | 0.0377 | Excited State 6:  | 3.4517 | 359.20 | 0.0000 |
| Excited State 16: | 4.5978 | 269.66 | 0.1399 | Excited State 7:  | 3.5471 | 349.54 | 0.0000 |
| Excited State 17: | 4.7106 | 263.20 | 0.0279 | Excited State 9:  | 3.6270 | 341.84 | 0.0000 |
| Excited State 18: | 4.7925 | 258.70 | 0.3070 | Excited State 10: | 3.6504 | 339.64 | 0.0000 |

Excited State 19: 4.8507 255.60 0.1921 Excited State 11: 3.9072 317.32 0.0000  
 Excited State 20: 4.8863 253.74 0.1324 Excited State 13: 4.0427 306.69 0.0000

3-D-13-A-1P234-OPA-n-hexane

| Singlets          |        |        |        | Triplets          |        |        |        |
|-------------------|--------|--------|--------|-------------------|--------|--------|--------|
|                   | Ex.En  | WL     | OS     |                   | Ex.En  | WL     | OS     |
| Excited State 4:  | 3.2624 | 380.04 | 0.2195 | Excited State 1:  | 2.1104 | 587.49 | 0.0000 |
| Excited State 7:  | 3.5239 | 351.83 | 0.1521 | Excited State 2:  | 2.6721 | 463.99 | 0.0000 |
| Excited State 12: | 4.0074 | 309.38 | 0.0483 | Excited State 3:  | 3.0018 | 413.04 | 0.0000 |
| Excited State 14: | 4.1647 | 297.70 | 0.3901 | Excited State 5:  | 3.3302 | 372.31 | 0.0000 |
| Excited State 15: | 4.3468 | 285.23 | 0.0775 | Excited State 6:  | 3.4548 | 358.87 | 0.0000 |
| Excited State 16: | 4.5665 | 271.51 | 0.2848 | Excited State 8:  | 3.5250 | 351.73 | 0.0000 |
| Excited State 17: | 4.6893 | 264.40 | 0.1110 | Excited State 9:  | 3.6296 | 341.59 | 0.0000 |
| Excited State 18: | 4.7481 | 261.12 | 0.4148 | Excited State 10: | 3.6552 | 339.20 | 0.0000 |
| Excited State 19: | 4.8127 | 257.62 | 0.1003 | Excited State 11: | 3.9044 | 317.55 | 0.0000 |
| Excited State 20: | 4.8590 | 255.17 | 0.1427 | Excited State 13: | 4.0373 | 307.10 | 0.0000 |

1-A-11-D-P1234-OPA-CC14

| Singlets          |        |        |        | Triplets          |        |         |        |
|-------------------|--------|--------|--------|-------------------|--------|---------|--------|
|                   | Ex.En  | WL     | OS     |                   | Ex.En  | WL      | OS     |
| Excited State 4:  | 2.6728 | 463.87 | 0.0364 | Excited State 1:  | 1.1821 | 1048.81 | 0.0000 |
| Excited State 5:  | 2.8563 | 434.08 | 0.2491 | Excited State 2:  | 2.2387 | 553.82  | 0.0000 |
| Excited State 11: | 3.5629 | 347.99 | 0.0732 | Excited State 3:  | 2.4774 | 500.46  | 0.0000 |
| Excited State 13: | 3.7458 | 331.00 | 0.1226 | Excited State 6:  | 2.9059 | 426.66  | 0.0000 |
| Excited State 15: | 3.9092 | 317.16 | 0.1901 | Excited State 7:  | 3.0348 | 408.54  | 0.0000 |
| Excited State 16: | 4.0061 | 309.49 | 0.3966 | Excited State 8:  | 3.2151 | 385.63  | 0.0000 |
| Excited State 17: | 4.3023 | 288.18 | 0.3050 | Excited State 9:  | 3.3346 | 371.81  | 0.0000 |
| Excited State 18: | 4.5965 | 269.74 | 0.0552 | Excited State 10: | 3.4528 | 359.09  | 0.0000 |
| Excited State 19: | 4.6715 | 265.41 | 0.1112 | Excited State 12: | 3.6365 | 340.94  | 0.0000 |
| Excited State 20: | 4.7452 | 261.28 | 0.1196 | Excited State 14: | 3.7477 | 330.82  | 0.0000 |

## 1-A-11-D-P1234-OPA-DCM

| Singlets          |        |        |        | Triplets          |        |         |        |
|-------------------|--------|--------|--------|-------------------|--------|---------|--------|
|                   | Ex.En  | WL     | OS     |                   | Ex.En  | WL      | OS     |
| Excited State 4:  | 2.6714 | 464.12 | 0.0386 | Excited State 1:  | 1.1972 | 1035.66 | 0.0000 |
| Excited State 5:  | 2.8425 | 436.19 | 0.2432 | Excited State 2:  | 2.2193 | 558.67  | 0.0000 |
| Excited State 11: | 3.5564 | 348.62 | 0.0654 | Excited State 3:  | 2.4891 | 498.10  | 0.0000 |
| Excited State 14: | 3.7500 | 330.63 | 0.1370 | Excited State 6:  | 2.8875 | 429.39  | 0.0000 |
| Excited State 15: | 3.9012 | 317.81 | 0.1794 | Excited State 7:  | 3.0307 | 409.09  | 0.0000 |
| Excited State 16: | 3.9985 | 310.08 | 0.3953 | Excited State 8:  | 3.2016 | 387.25  | 0.0000 |
| Excited State 17: | 4.3020 | 288.20 | 0.2979 | Excited State 9:  | 3.3350 | 371.77  | 0.0000 |
| Excited State 18: | 4.5927 | 269.96 | 0.0441 | Excited State 10: | 3.4598 | 358.35  | 0.0000 |
| Excited State 19: | 4.6637 | 265.85 | 0.0699 | Excited State 12: | 3.6403 | 340.59  | 0.0000 |
| Excited State 20: | 4.7386 | 261.65 | 0.1581 | Excited State 13: | 3.7338 | 332.06  | 0.0000 |

## 1-A-11-D-P1234-OPA-DMSO

| Singlets          |        |        |        | Triplets          |        |         |        |
|-------------------|--------|--------|--------|-------------------|--------|---------|--------|
|                   | Ex.En  | WL     | OS     |                   | Ex.En  | WL      | OS     |
| Excited State 4:  | 2.6731 | 463.82 | 0.0385 | Excited State 1:  | 1.2038 | 1029.97 | 0.0000 |
| Excited State 5:  | 2.8400 | 436.57 | 0.2433 | Excited State 2:  | 2.2132 | 560.20  | 0.0000 |
| Excited State 11: | 3.5557 | 348.69 | 0.0622 | Excited State 3:  | 2.4950 | 496.93  | 0.0000 |
| Excited State 14: | 3.7524 | 330.42 | 0.1482 | Excited State 6:  | 2.8813 | 430.31  | 0.0000 |
| Excited State 15: | 3.9007 | 317.85 | 0.1763 | Excited State 7:  | 3.0315 | 408.99  | 0.0000 |
| Excited State 16: | 3.9946 | 310.38 | 0.3910 | Excited State 8:  | 3.1969 | 387.82  | 0.0000 |
| Excited State 17: | 4.3049 | 288.01 | 0.2921 | Excited State 9:  | 3.3349 | 371.78  | 0.0000 |
| Excited State 18: | 4.5916 | 270.02 | 0.0411 | Excited State 10: | 3.4628 | 358.05  | 0.0000 |
| Excited State 19: | 4.6593 | 266.10 | 0.0608 | Excited State 12: | 3.6454 | 340.12  | 0.0000 |
| Excited State 20: | 4.7383 | 261.67 | 0.1666 | Excited State 13: | 3.7289 | 332.50  | 0.0000 |

## 1-A-11-D-P1234-OPA

| Singlets |  |  |  | Triplets |  |  |  |
|----------|--|--|--|----------|--|--|--|
|----------|--|--|--|----------|--|--|--|

|                   | Ex.En  | WL     | OS     |                   | Ex.En  | WL      | OS     |
|-------------------|--------|--------|--------|-------------------|--------|---------|--------|
| Excited State 4:  | 2.7084 | 457.77 | 0.0243 | Excited State 1:  | 1.1682 | 1061.30 | 0.0000 |
| Excited State 5:  | 2.9202 | 424.57 | 0.1806 | Excited State 2:  | 2.2635 | 547.75  | 0.0000 |
| Excited State 11: | 3.5954 | 344.84 | 0.0613 | Excited State 3:  | 2.4708 | 501.79  | 0.0000 |
| Excited State 14: | 3.7711 | 328.78 | 0.0712 | Excited State 6:  | 2.9272 | 423.56  | 0.0000 |
| Excited State 15: | 3.9641 | 312.77 | 0.0798 | Excited State 7:  | 3.0477 | 406.81  | 0.0000 |
| Excited State 16: | 4.0689 | 304.71 | 0.3095 | Excited State 8:  | 3.2304 | 383.81  | 0.0000 |
| Excited State 17: | 4.3464 | 285.26 | 0.2757 | Excited State 9:  | 3.3345 | 371.82  | 0.0000 |
| Excited State 18: | 4.6189 | 268.43 | 0.0372 | Excited State 10: | 3.4467 | 359.72  | 0.0000 |
| Excited State 19: | 4.6930 | 264.19 | 0.0678 | Excited State 12: | 3.6437 | 340.27  | 0.0000 |
| Excited State 20: | 4.7550 | 260.74 | 0.0151 | Excited State 13: | 3.7644 | 329.36  | 0.0000 |

1-A-11-D-P1234-OPA-n-hexane

| Singlets          |        |        |        | Triplets          |        |         |        |
|-------------------|--------|--------|--------|-------------------|--------|---------|--------|
|                   | Ex.En  | WL     | OS     |                   | Ex.En  | WL      | OS     |
| Excited State 4:  | 2.6780 | 462.97 | 0.0344 | Excited State 1:  | 1.1796 | 1051.07 | 0.0000 |
| Excited State 5:  | 2.8658 | 432.64 | 0.2391 | Excited State 2:  | 2.2430 | 552.77  | 0.0000 |
| Excited State 11: | 3.5677 | 347.52 | 0.0722 | Excited State 3:  | 2.4758 | 500.78  | 0.0000 |
| Excited State 13: | 3.7493 | 330.69 | 0.1106 | Excited State 6:  | 2.9096 | 426.12  | 0.0000 |
| Excited State 15: | 3.9179 | 316.46 | 0.1706 | Excited State 7:  | 3.0366 | 408.30  | 0.0000 |
| Excited State 16: | 4.0152 | 308.79 | 0.3885 | Excited State 8:  | 3.2178 | 385.30  | 0.0000 |
| Excited State 17: | 4.3080 | 287.80 | 0.3002 | Excited State 9:  | 3.3346 | 371.82  | 0.0000 |
| Excited State 18: | 4.5999 | 269.54 | 0.0527 | Excited State 10: | 3.4516 | 359.21  | 0.0000 |
| Excited State 19: | 4.6750 | 265.21 | 0.1034 | Excited State 12: | 3.6372 | 340.88  | 0.0000 |
| Excited State 20: | 4.7510 | 260.97 | 0.1052 | Excited State 14: | 3.7506 | 330.57  | 0.0000 |

3-A-10-D-P1234-OPA-CC14

| Singlets         |        |        |        | Triplets         |        |         |        |
|------------------|--------|--------|--------|------------------|--------|---------|--------|
|                  | Ex.En  | WL     | OS     |                  | Ex.En  | WL      | OS     |
| Excited State 4: | 2.7513 | 450.63 | 0.1220 | Excited State 1: | 1.1385 | 1088.97 | 0.0000 |

|                   |        |        |        |                   |        |        |        |
|-------------------|--------|--------|--------|-------------------|--------|--------|--------|
| Excited State 6:  | 3.2106 | 386.18 | 0.1267 | Excited State 2:  | 2.3580 | 525.80 | 0.0000 |
| Excited State 11: | 3.6937 | 335.66 | 0.2207 | Excited State 3:  | 2.5077 | 494.42 | 0.0000 |
| Excited State 13: | 3.8343 | 323.35 | 0.4819 | Excited State 5:  | 2.9311 | 422.99 | 0.0000 |
| Excited State 15: | 4.0398 | 306.91 | 0.0036 | Excited State 7:  | 3.2231 | 384.67 | 0.0000 |
| Excited State 16: | 4.2614 | 290.95 | 0.2471 | Excited State 8:  | 3.3769 | 367.15 | 0.0000 |
| Excited State 17: | 4.4029 | 281.60 | 0.0487 | Excited State 9:  | 3.4544 | 358.92 | 0.0000 |
| Excited State 18: | 4.4576 | 278.14 | 0.0643 | Excited State 10: | 3.5407 | 350.17 | 0.0000 |
| Excited State 19: | 4.5750 | 271.00 | 0.2268 | Excited State 12: | 3.8008 | 326.20 | 0.0000 |
| Excited State 20: | 4.7467 | 261.20 | 0.4397 | Excited State 14: | 3.8769 | 319.80 | 0.0000 |

### 3-A-10-D-P1234-OPA-DCM

| Singlets          |        |        |        | Triplets          |        |         |        |
|-------------------|--------|--------|--------|-------------------|--------|---------|--------|
|                   | Ex.En  | WL     | OS     |                   | Ex.En  | WL      | OS     |
| Excited State 4:  | 2.7461 | 451.49 | 0.1239 | Excited State 1:  | 1.1497 | 1078.37 | 0.0000 |
| Excited State 6:  | 3.1774 | 390.21 | 0.1181 | Excited State 2:  | 2.3550 | 526.47  | 0.0000 |
| Excited State 11: | 3.6677 | 338.05 | 0.2253 | Excited State 3:  | 2.4892 | 498.09  | 0.0000 |
| Excited State 13: | 3.8426 | 322.66 | 0.4569 | Excited State 5:  | 2.9176 | 424.96  | 0.0000 |
| Excited State 15: | 4.0311 | 307.57 | 0.0043 | Excited State 7:  | 3.2261 | 384.32  | 0.0000 |
| Excited State 16: | 4.2401 | 292.41 | 0.2341 | Excited State 8:  | 3.3775 | 367.09  | 0.0000 |
| Excited State 17: | 4.3826 | 282.90 | 0.0453 | Excited State 9:  | 3.4605 | 358.28  | 0.0000 |
| Excited State 18: | 4.4492 | 278.67 | 0.0896 | Excited State 10: | 3.5293 | 351.30  | 0.0000 |
| Excited State 19: | 4.5542 | 272.24 | 0.2282 | Excited State 12: | 3.7969 | 326.54  | 0.0000 |
| Excited State 20: | 4.7364 | 261.77 | 0.2742 | Excited State 14: | 3.8736 | 320.07  | 0.0000 |

### 3-A-10-D-P1234-OPA-DMSO

| Singlets          |        |        |        | Triplets         |        |         |        |
|-------------------|--------|--------|--------|------------------|--------|---------|--------|
|                   | Ex.En  | WL     | OS     |                  | Ex.En  | WL      | OS     |
| Excited State 4:  | 2.7436 | 451.90 | 0.1251 | Excited State 1: | 1.1533 | 1075.05 | 0.0000 |
| Excited State 6:  | 3.1665 | 391.54 | 0.1153 | Excited State 2: | 2.3538 | 526.74  | 0.0000 |
| Excited State 11: | 3.6587 | 338.87 | 0.2274 | Excited State 3: | 2.4836 | 499.21  | 0.0000 |

|                   |        |        |        |                   |        |        |        |
|-------------------|--------|--------|--------|-------------------|--------|--------|--------|
| Excited State 13: | 3.8445 | 322.50 | 0.4499 | Excited State 5:  | 2.9130 | 425.62 | 0.0000 |
| Excited State 15: | 4.0282 | 307.79 | 0.0045 | Excited State 7:  | 3.2269 | 384.22 | 0.0000 |
| Excited State 16: | 4.2333 | 292.88 | 0.2308 | Excited State 8:  | 3.3775 | 367.09 | 0.0000 |
| Excited State 17: | 4.3753 | 283.38 | 0.0433 | Excited State 9:  | 3.4629 | 358.03 | 0.0000 |
| Excited State 18: | 4.4454 | 278.90 | 0.1032 | Excited State 10: | 3.5255 | 351.68 | 0.0000 |
| Excited State 19: | 4.5485 | 272.58 | 0.2247 | Excited State 12: | 3.7951 | 326.69 | 0.0000 |
| Excited State 20: | 4.7324 | 261.99 | 0.2218 | Excited State 14: | 3.8721 | 320.20 | 0.0000 |

### 3-A-10-D-P1234-OPA

| Singlets          |        |        |        | Triplets          |        |         |        |
|-------------------|--------|--------|--------|-------------------|--------|---------|--------|
|                   | Ex.En  | WL     | OS     |                   | Ex.En  | WL      | OS     |
| Excited State 4:  | 2.7915 | 444.14 | 0.0838 | Excited State 1:  | 1.1238 | 1103.26 | 0.0000 |
| Excited State 7:  | 3.2746 | 378.63 | 0.0840 | Excited State 2:  | 2.3603 | 525.28  | 0.0000 |
| Excited State 11: | 3.7547 | 330.21 | 0.0878 | Excited State 3:  | 2.5304 | 489.99  | 0.0000 |
| Excited State 14: | 3.8846 | 319.17 | 0.4497 | Excited State 5:  | 2.9468 | 420.74  | 0.0000 |
| Excited State 15: | 4.0711 | 304.55 | 0.0017 | Excited State 6:  | 3.2183 | 385.25  | 0.0000 |
| Excited State 16: | 4.3213 | 286.91 | 0.1936 | Excited State 8:  | 3.3777 | 367.06  | 0.0000 |
| Excited State 17: | 4.4355 | 279.53 | 0.0323 | Excited State 9:  | 3.4485 | 359.53  | 0.0000 |
| Excited State 18: | 4.4861 | 276.37 | 0.0394 | Excited State 10: | 3.5538 | 348.88  | 0.0000 |
| Excited State 19: | 4.6256 | 268.04 | 0.1938 | Excited State 12: | 3.8044 | 325.90  | 0.0000 |
| Excited State 20: | 4.8106 | 257.73 | 0.1359 | Excited State 13: | 3.8794 | 319.60  | 0.0000 |

### 3-A-10-D-P1234-OPA-n-hexane

| Singlets          |        |        |        | Triplets         |        |         |        |
|-------------------|--------|--------|--------|------------------|--------|---------|--------|
|                   | Ex.En  | WL     | OS     |                  | Ex.En  | WL      | OS     |
| Excited State 4:  | 2.7577 | 449.59 | 0.1159 | Excited State 1: | 1.1362 | 1091.23 | 0.0000 |
| Excited State 6:  | 3.2211 | 384.92 | 0.1209 | Excited State 2: | 2.3585 | 525.70  | 0.0000 |
| Excited State 11: | 3.7045 | 334.69 | 0.1968 | Excited State 3: | 2.5115 | 493.67  | 0.0000 |
| Excited State 13: | 3.8400 | 322.88 | 0.4827 | Excited State 5: | 2.9340 | 422.58  | 0.0000 |
| Excited State 15: | 4.0447 | 306.54 | 0.0032 | Excited State 7: | 3.2223 | 384.77  | 0.0000 |

|                   |        |        |        |                   |        |        |        |
|-------------------|--------|--------|--------|-------------------|--------|--------|--------|
| Excited State 16: | 4.2709 | 290.30 | 0.2394 | Excited State 8:  | 3.3770 | 367.14 | 0.0000 |
| Excited State 17: | 4.4091 | 281.20 | 0.0473 | Excited State 9:  | 3.4533 | 359.03 | 0.0000 |
| Excited State 18: | 4.4621 | 277.86 | 0.0557 | Excited State 10: | 3.5429 | 349.95 | 0.0000 |
| Excited State 19: | 4.5828 | 270.55 | 0.2227 | Excited State 12: | 3.8016 | 326.14 | 0.0000 |
| Excited State 20: | 4.7573 | 260.62 | 0.3980 | Excited State 14: | 3.8775 | 319.76 | 0.0000 |

C1234-OPA-CCl4

| Singlets          |        |        |        | Triplets          |        |         |        |
|-------------------|--------|--------|--------|-------------------|--------|---------|--------|
|                   | Ex.En  | WL     | OS     |                   | Ex.En  | WL      | OS     |
| Excited State 4:  | 3.0131 | 411.48 | 0.0717 | Excited State 1:  | 1.2151 | 1020.36 | 0.0000 |
| Excited State 9:  | 3.6145 | 343.01 | 0.0056 | Excited State 2:  | 2.5040 | 495.14  | 0.0000 |
| Excited State 11: | 3.9036 | 317.62 | 0.4957 | Excited State 3:  | 2.8496 | 435.09  | 0.0000 |
| Excited State 13: | 4.2047 | 294.87 | 0.1096 | Excited State 5:  | 3.2074 | 386.55  | 0.0000 |
| Excited State 15: | 4.5246 | 274.02 | 0.0303 | Excited State 6:  | 3.4819 | 356.08  | 0.0000 |
| Excited State 16: | 4.6597 | 266.08 | 0.4063 | Excited State 7:  | 3.5039 | 353.85  | 0.0000 |
| Excited State 17: | 4.6999 | 263.80 | 0.0680 | Excited State 8:  | 3.5520 | 349.05  | 0.0000 |
| Excited State 18: | 5.1117 | 242.55 | 0.1926 | Excited State 10: | 3.8237 | 324.25  | 0.0000 |
| Excited State 19: | 5.1945 | 238.68 | 0.0344 | Excited State 12: | 4.0898 | 303.15  | 0.0000 |
| Excited State 20: | 5.2641 | 235.53 | 0.0502 | Excited State 14: | 4.4123 | 280.99  | 0.0000 |

C1234-OPA-DCM

| Singlets          |        |        |        | Triplets         |        |         |        |
|-------------------|--------|--------|--------|------------------|--------|---------|--------|
|                   | Ex.En  | WL     | OS     |                  | Ex.En  | WL      | OS     |
| Excited State 4:  | 3.0172 | 410.92 | 0.0703 | Excited State 1: | 1.2212 | 1015.26 | 0.0000 |
| Excited State 9:  | 3.6161 | 342.86 | 0.0067 | Excited State 2: | 2.5085 | 494.25  | 0.0000 |
| Excited State 11: | 3.9093 | 317.15 | 0.4854 | Excited State 3: | 2.8523 | 434.68  | 0.0000 |
| Excited State 13: | 4.2066 | 294.74 | 0.1086 | Excited State 5: | 3.2085 | 386.42  | 0.0000 |
| Excited State 15: | 4.5274 | 273.85 | 0.0318 | Excited State 6: | 3.4861 | 355.66  | 0.0000 |
| Excited State 16: | 4.6642 | 265.82 | 0.3860 | Excited State 7: | 3.5094 | 353.29  | 0.0000 |
| Excited State 17: | 4.7025 | 263.66 | 0.0816 | Excited State 8: | 3.5545 | 348.81  | 0.0000 |

|                   |        |        |        |                   |        |        |        |
|-------------------|--------|--------|--------|-------------------|--------|--------|--------|
| Excited State 18: | 5.1197 | 242.17 | 0.1932 | Excited State 10: | 3.8268 | 323.99 | 0.0000 |
| Excited State 19: | 5.1929 | 238.76 | 0.0303 | Excited State 12: | 4.0890 | 303.21 | 0.0000 |
| Excited State 20: | 5.2556 | 235.91 | 0.0354 | Excited State 14: | 4.4160 | 280.76 | 0.0000 |

C1234-OPA-DMSO

| Singlets          |        |        |        | Triplets          |        |         |        |
|-------------------|--------|--------|--------|-------------------|--------|---------|--------|
|                   | Ex.En  | WL     | OS     |                   | Ex.En  | WL      | OS     |
| Excited State 4:  | 3.0184 | 410.76 | 0.0699 | Excited State 1:  | 1.2238 | 1013.14 | 0.0000 |
| Excited State 9:  | 3.6168 | 342.81 | 0.0072 | Excited State 2:  | 2.5103 | 493.90  | 0.0000 |
| Excited State 11: | 3.9108 | 317.03 | 0.4822 | Excited State 3:  | 2.8534 | 434.52  | 0.0000 |
| Excited State 13: | 4.2070 | 294.71 | 0.1087 | Excited State 5:  | 3.2087 | 386.40  | 0.0000 |
| Excited State 15: | 4.5286 | 273.78 | 0.0332 | Excited State 6:  | 3.4877 | 355.49  | 0.0000 |
| Excited State 16: | 4.6656 | 265.74 | 0.3772 | Excited State 7:  | 3.5116 | 353.07  | 0.0000 |
| Excited State 17: | 4.7034 | 263.60 | 0.0887 | Excited State 8:  | 3.5557 | 348.69  | 0.0000 |
| Excited State 18: | 5.1217 | 242.07 | 0.1953 | Excited State 10: | 3.8282 | 323.87  | 0.0000 |
| Excited State 19: | 5.1925 | 238.78 | 0.0275 | Excited State 12: | 4.0884 | 303.26  | 0.0000 |
| Excited State 20: | 5.2525 | 236.05 | 0.0347 | Excited State 14: | 4.4178 | 280.65  | 0.0000 |

C1234-OPA

| Singlets          |        |        |        | Triplets          |        |         |        |
|-------------------|--------|--------|--------|-------------------|--------|---------|--------|
|                   | Ex.En  | WL     | OS     |                   | Ex.En  | WL      | OS     |
| Excited State 4:  | 3.0424 | 407.52 | 0.0484 | Excited State 1:  | 1.2099 | 1024.77 | 0.0000 |
| Excited State 9:  | 3.6157 | 342.91 | 0.0025 | Excited State 2:  | 2.5001 | 495.91  | 0.0000 |
| Excited State 11: | 3.9695 | 312.34 | 0.3596 | Excited State 3:  | 2.8472 | 435.46  | 0.0000 |
| Excited State 13: | 4.2260 | 293.38 | 0.0847 | Excited State 5:  | 3.2061 | 386.72  | 0.0000 |
| Excited State 15: | 4.5320 | 273.57 | 0.0144 | Excited State 6:  | 3.4785 | 356.43  | 0.0000 |
| Excited State 16: | 4.6980 | 263.91 | 0.1109 | Excited State 7:  | 3.4991 | 354.33  | 0.0000 |
| Excited State 17: | 4.7219 | 262.57 | 0.2471 | Excited State 8:  | 3.5503 | 349.22  | 0.0000 |
| Excited State 18: | 5.1309 | 241.64 | 0.0633 | Excited State 10: | 3.8213 | 324.46  | 0.0000 |
| Excited State 19: | 5.2051 | 238.20 | 0.0187 | Excited State 12: | 4.0899 | 303.15  | 0.0000 |

Excited State 20: 5.2835 234.66 0.0188 Excited State 14: 4.4098 281.15 0.0000

C1234-OPA-n-hexane

| Singlets          |        |        |        | Triplets          |        |         |        |
|-------------------|--------|--------|--------|-------------------|--------|---------|--------|
|                   | Ex.En  | WL     | OS     |                   | Ex.En  | WL      | OS     |
| Excited State 4:  | 3.0174 | 410.90 | 0.0680 | Excited State 1:  | 1.2141 | 1021.23 | 0.0000 |
| Excited State 9:  | 3.6147 | 343.00 | 0.0050 | Excited State 2:  | 2.5032 | 495.29  | 0.0000 |
| Excited State 11: | 3.9126 | 316.89 | 0.4769 | Excited State 3:  | 2.8492 | 435.16  | 0.0000 |
| Excited State 13: | 4.2077 | 294.66 | 0.1050 | Excited State 5:  | 3.2072 | 386.58  | 0.0000 |
| Excited State 15: | 4.5258 | 273.95 | 0.0269 | Excited State 6:  | 3.4812 | 356.15  | 0.0000 |
| Excited State 16: | 4.6668 | 265.67 | 0.3840 | Excited State 7:  | 3.5029 | 353.94  | 0.0000 |
| Excited State 17: | 4.7014 | 263.72 | 0.0718 | Excited State 8:  | 3.5516 | 349.09  | 0.0000 |
| Excited State 18: | 5.1156 | 242.37 | 0.1638 | Excited State 10: | 3.8232 | 324.29  | 0.0000 |
| Excited State 19: | 5.1961 | 238.61 | 0.0313 | Excited State 12: | 4.0899 | 303.15  | 0.0000 |
| Excited State 20: | 5.2673 | 235.38 | 0.0385 | Excited State 14: | 4.4118 | 281.03  | 0.0000 |

P1234-geo-opt-abs

| Singlets          |        |        |        | Triplets          |        |        |        |
|-------------------|--------|--------|--------|-------------------|--------|--------|--------|
|                   | Ex.En  | WL     | OS     |                   | Ex.En  | WL     | OS     |
| Excited State 4:  | 2.9545 | 419.64 | 0.0326 | Excited State 1:  | 1.3143 | 943.31 | 0.0000 |
| Excited State 9:  | 3.5196 | 352.26 | 0.0578 | Excited State 2:  | 2.4670 | 502.58 | 0.0000 |
| Excited State 11: | 3.8896 | 318.75 | 0.4525 | Excited State 3:  | 2.6927 | 460.45 | 0.0000 |
| Excited State 14: | 4.0586 | 305.49 | 0.0985 | Excited State 5:  | 3.1411 | 394.71 | 0.0000 |
| Excited State 15: | 4.2802 | 289.67 | 0.0240 | Excited State 6:  | 3.2556 | 380.83 | 0.0000 |
| Excited State 16: | 4.5853 | 270.40 | 0.0288 | Excited State 7:  | 3.4456 | 359.83 | 0.0000 |
| Excited State 17: | 4.6556 | 266.31 | 0.2724 | Excited State 8:  | 3.4893 | 355.33 | 0.0000 |
| Excited State 18: | 4.6995 | 263.82 | 0.0309 | Excited State 10: | 3.6084 | 343.60 | 0.0000 |
| Excited State 19: | 4.7861 | 259.05 | 0.0184 | Excited State 12: | 3.9350 | 315.08 | 0.0000 |
| Excited State 20: | 5.0377 | 246.11 | 0.1672 | Excited State 13: | 4.0513 | 306.03 | 0.0000 |

P1234-geo-opt-abs-CCl4

| Singlets          |        |        |        | Triplets          |        |        |        |
|-------------------|--------|--------|--------|-------------------|--------|--------|--------|
|                   | Ex.En  | WL     | OS     |                   | Ex.En  | WL     | OS     |
| Excited State 4:  | 2.9295 | 423.23 | 0.0492 | Excited State 1:  | 1.3188 | 940.14 | 0.0000 |
| Excited State 9:  | 3.5021 | 354.03 | 0.1164 | Excited State 2:  | 2.4697 | 502.02 | 0.0000 |
| Excited State 11: | 3.8153 | 324.96 | 0.5614 | Excited State 3:  | 2.6956 | 459.95 | 0.0000 |
| Excited State 13: | 4.0300 | 307.65 | 0.1587 | Excited State 5:  | 3.1435 | 394.42 | 0.0000 |
| Excited State 15: | 4.2631 | 290.83 | 0.0406 | Excited State 6:  | 3.2583 | 380.52 | 0.0000 |
| Excited State 16: | 4.5676 | 271.44 | 0.0955 | Excited State 7:  | 3.4513 | 359.24 | 0.0000 |
| Excited State 17: | 4.6173 | 268.52 | 0.3168 | Excited State 8:  | 3.4915 | 355.10 | 0.0000 |
| Excited State 18: | 4.6880 | 264.47 | 0.0416 | Excited State 10: | 3.6128 | 343.18 | 0.0000 |
| Excited State 19: | 4.8030 | 258.14 | 0.0264 | Excited State 12: | 3.9382 | 314.83 | 0.0000 |
| Excited State 20: | 4.9893 | 248.50 | 0.3535 | Excited State 14: | 4.0518 | 306.00 | 0.0000 |

P1234-geo-opt-abs-DCM

| Singlets          |        |        |        | Triplets          |        |        |        |
|-------------------|--------|--------|--------|-------------------|--------|--------|--------|
|                   | Ex.En  | WL     | OS     |                   | Ex.En  | WL     | OS     |
| Excited State 4:  | 2.9326 | 422.77 | 0.0481 | Excited State 1:  | 1.3239 | 936.53 | 0.0000 |
| Excited State 9:  | 3.5053 | 353.70 | 0.1123 | Excited State 2:  | 2.4722 | 501.51 | 0.0000 |
| Excited State 11: | 3.8212 | 324.46 | 0.5579 | Excited State 3:  | 2.6984 | 459.48 | 0.0000 |
| Excited State 13: | 4.0313 | 307.55 | 0.1503 | Excited State 5:  | 3.1453 | 394.18 | 0.0000 |
| Excited State 15: | 4.2679 | 290.50 | 0.0408 | Excited State 6:  | 3.2613 | 380.17 | 0.0000 |
| Excited State 16: | 4.5699 | 271.30 | 0.0879 | Excited State 7:  | 3.4575 | 358.59 | 0.0000 |
| Excited State 17: | 4.6237 | 268.15 | 0.3148 | Excited State 8:  | 3.4940 | 354.85 | 0.0000 |
| Excited State 18: | 4.6915 | 264.27 | 0.0420 | Excited State 10: | 3.6183 | 342.66 | 0.0000 |
| Excited State 19: | 4.8274 | 256.83 | 0.0254 | Excited State 12: | 3.9417 | 314.54 | 0.0000 |
| Excited State 20: | 4.9885 | 248.54 | 0.3223 | Excited State 14: | 4.0517 | 306.00 | 0.0000 |

P1234-geo-opt-abs-DMSO

| Singlets |       |    |    | Triplets |       |    |    |
|----------|-------|----|----|----------|-------|----|----|
|          | Ex.En | WL | OS |          | Ex.En | WL | OS |

Excited State 4: 2.9336 422.64 0.0479 Excited State 1: 1.3262 934.91 0.0000  
 Excited State 9: 3.5063 353.60 0.1117 Excited State 2: 2.4730 501.36 0.0000  
 Excited State 11: 3.8227 324.34 0.5574 Excited State 3: 2.6993 459.33 0.0000  
 Excited State 13: 4.0309 307.58 0.1478 Excited State 5: 3.1458 394.13 0.0000  
 Excited State 15: 4.2697 290.38 0.0411 Excited State 6: 3.2623 380.05 0.0000  
 Excited State 16: 4.5705 271.27 0.0864 Excited State 7: 3.4600 358.34 0.0000  
 Excited State 17: 4.6260 268.01 0.3137 Excited State 8: 3.4950 354.75 0.0000  
 Excited State 18: 4.6928 264.20 0.0424 Excited State 10: 3.6206 342.44 0.0000  
 Excited State 19: 4.8370 256.33 0.0251 Excited State 12: 3.9431 314.44 0.0000  
 Excited State 20: 4.9872 248.61 0.3131 Excited State 14: 4.0515 306.02 0.0000

P1234-geo-opt-abs-n-hexane

| Singlets          |        |        |        | Triplets          |        |        |        |
|-------------------|--------|--------|--------|-------------------|--------|--------|--------|
|                   | Ex.En  | WL     | OS     |                   | Ex.En  | WL     | OS     |
| Excited State 4:  | 2.9332 | 422.69 | 0.0465 | Excited State 1:  | 1.3179 | 940.74 | 0.0000 |
| Excited State 9:  | 3.5049 | 353.75 | 0.1059 | Excited State 2:  | 2.4692 | 502.12 | 0.0000 |
| Excited State 11: | 3.8250 | 324.14 | 0.5487 | Excited State 3:  | 2.6951 | 460.04 | 0.0000 |
| Excited State 13: | 4.0344 | 307.32 | 0.1477 | Excited State 5:  | 3.1431 | 394.47 | 0.0000 |
| Excited State 15: | 4.2655 | 290.67 | 0.0377 | Excited State 6:  | 3.2577 | 380.58 | 0.0000 |
| Excited State 16: | 4.5709 | 271.25 | 0.0801 | Excited State 7:  | 3.4502 | 359.35 | 0.0000 |
| Excited State 17: | 4.6221 | 268.24 | 0.3145 | Excited State 8:  | 3.4911 | 355.15 | 0.0000 |
| Excited State 18: | 4.6895 | 264.39 | 0.0389 | Excited State 10: | 3.6119 | 343.26 | 0.0000 |
| Excited State 19: | 4.7995 | 258.33 | 0.0252 | Excited State 12: | 3.9376 | 314.88 | 0.0000 |
| Excited State 20: | 4.9973 | 248.10 | 0.3216 | Excited State 14: | 4.0517 | 306.00 | 0.0000 |

ST6: s and p character (in %) obtained from Natural Transition Orbitals (NTO).

| System / Considered Carbon atom | Percentage of S | Percentage of P |
|---------------------------------|-----------------|-----------------|
| C1234 / C26, C27                | 29.17, 29.19    | 70.78, 70.76    |
| 1C234 / C21, C31                | 31.71, 31.56    | 68.25, 68.40    |
| 12C34 / C21, C31                | 31.71, 31.76    | 68.25, 68.20    |
| P1234 / C26, C27                | 30.16, 29.97    | 69.81, 69.98    |
| 1P234 / C21, C32                | 32.09, 31.71    | 67.87, 68.26    |
| 12P34 / C21, C32                | 31.95, 31.86    | 68.01, 68.10    |

ST7: Root Mean Squared Deviation (RMSD) of all HeIC, HeIP, and DAHeIP systems in vacuum and other solvents.

| Systems        | RMSD-Values             |                  |             |              |       |
|----------------|-------------------------|------------------|-------------|--------------|-------|
|                | Vacuum                  | CCl <sub>4</sub> | DCM         | DMSO         | n-hex |
| C1234-P1234    | 0.21                    | 0.21             | 0.21        | 0.21         | 0.21  |
| 1C234-1P234    | 0.28                    | 0.28             | 0.27        | 0.27         | 0.28  |
| 12C34-12P34    | 0.35                    | 0.35             | 0.34        | 0.34         | 0.35  |
| Systems        | Vacuum-CCl <sub>4</sub> | Vacuum-DCM       | Vacuum-DMSO | Vacuum-n-hex |       |
| C1234          | 0.009                   | 0.013            | 0.017       | 0.008        |       |
| 1C234          | 0.007                   | 0.019            | 0.026       | 0.006        |       |
| 12C34          | 0.005                   | 0.016            | 0.022       | 0.004        |       |
| P1234          | 0.008                   | 0.015            | 0.017       | 0.006        |       |
| 1P234          | 0.008                   | 0.02             | 0.023       | 0.006        |       |
| 12P34          | 0.008                   | 0.024            | 0.034       | 0.005        |       |
| 1-A-13-D-P1234 | 0.02                    | 0.03             | 0.03        | 0.01         |       |
| 3-A-12-D-P1234 | 0.03                    | 0.05             | 0.05        | 0.02         |       |
| 1-A-11-D-P1234 | 0.02                    | 0.04             | 0.05        | 0.02         |       |
| 3-A-10-D-P1234 | 0.01                    | 0.03             | 0.03        | 0.01         |       |
| 1-D-13-A-1P234 | 0.022                   | 0.06             | 0.08        | 0.02         |       |
| 3-D-13-A-1P234 | 0.02                    | 0.03             | 0.04        | 0.01         |       |
| 2-D-10-A-12P34 | 0.02                    | 0.04             | 0.06        | 0.01         |       |
| 2-D-12-A-12P34 | 0.18                    | 0.20             | 0.21        | 0.17         |       |

SC1: Python code for calculating rate of inter system crossing ( $k_{ISC}$ ) in ( $\text{sec}^{-1}$ ).

```
# -*- coding: utf-7 -*-
```

```
"""
```

```
Spyder Editor
```

```
This is a temporary script file.
```

```
"""
```

```
import numpy as np
```

```
import pandas as pd
```

```
import scipy.linalg as spl
```

```
from functools import reduce
```

```
def column_to_nxn_matrix(column_matrix, n):
```

```

if len(column_matrix) != n * n:

    print("Error: The column matrix size is incompatible with the desired n x n matrix size.")

    return None

matrix = np.array(column_matrix).reshape((n, n))

return matrix

a = [4]

open("integ-elements.txt","w")

for n in a:

    cm2au = 4.55634E-6

    sec2au = 4.134E+16

    ev2au = 0.0367498

    pi=3.141592654

    nvib = no. of vibrational modes

    deltaeab = energy difference between considered singlet and triplet

    deltaeab = deltaeab * ev2au

    socme = value of calculated socme*cm2au

    socmesq = socme*socme

    eta = 1.0*cm2au

    neg_num = 0.000000000020 # Upper limit of time integration in sec

    m1 = np.add(np.multiply(0.5,nvib),1.0)

    m2 = np.power(2.0,m1)

    kisc1 = np.multiply(m2,socmesq)

    fs = open("/path of the working directory/singlet-ir-text file")

    freqs = np.loadtxt(fs)

    freqs = np.array(freqs)

    freqs = freqs*cm2au

    freqs = np.diag(freqs)

    ft = open("/path of the working directory/triplet-ir-text file ")

```

```

freqt = np.loadtxt(ft)

freqt = np.array(freqt)

freqt = freqt*cm2au

freqt = np.diag(freqt)

j = open("/path of the working directory/duschinsky.dat")

j = np.loadtxt(j)

j = np.array(j)

j = column_to_nxn_matrix(j,nvib)

jdag = np.transpose(j)

d = open("/path of the working directory/displacement.dat")

d = np.loadtxt(d)

ddag = np.asmatrix(d)

d = np.transpose(ddag)

timeau = np.multiply(neg_num,sec2au) # upper limit of time is converted to au

delta = np.divide(timeau,n) # dt = 1E-15 sec = 826800 au

t = np.multiply(delta,-0.9999999) # to start lower limit of time integration in au near zero

integrand = 0.0

for ii in range(n):

    t = np.add(t,delta)

    damping = np.exp(-1.0*eta*eta*t*t)

    freqtt = freqt * t

    st = np.sin(freqtt)

    bt = np.tan(0.5*freqtt)

    sti = np.linalg.inv(st)

    bti = np.linalg.inv(bt)

    p1 = reduce(np.dot,[jdag,freqt,freqt,j])

    p2 = np.dot(freqs,freqs)

    p = np.add(p1,p2)

```

```

q1 = reduce(np.dot,[jdag,freqt,bt,j,freqs])
q2 = reduce(np.dot,[freqs,jdag,freqt,bti,j])
q = np.subtract(q1,q2)
iq = np.dot(1j,q)
piq = np.add(p,iq)
piqi = np.linalg.inv(piq)
c = piqi.real
e = piqi.imag
uprime = reduce(np.dot,[sti,freqs,freqt,e])
vprime = reduce(np.dot,[-1.0,sti,freqs,freqt,c])
iv = np.dot(1j,vprime)
uiv = np.add(uprime,iv)
detuiv = np.linalg.det(uiv)
u = detuiv.real
v = detuiv.imag
asqrtu2v2 = np.power((u*u + v*v),0.25)
ibt = np.dot(1j,bt)
x1 = reduce(np.dot,[jdag,freqt,ibt,j])
x2 = np.add(x1,freqs)
y = np.linalg.inv(x2)
aprime = y.real
bprime = y.imag
f = reduce(np.dot,[ddag,freqt,bt,j,aprime,jdag,freqt,bt,d])
f = np.dot(-1.0,f)
trfs = np.trace(freqs)
k1 = f + trfs*0.5
ek1 = np.exp(k1)
h1 = reduce(np.dot,[ddag,freqt,bt,j,bprime,jdag,freqt,bt,d])

```

```
h1dash = np.multiply(-1.0,h1)
h2 = reduce(np.dot,[ddag,freqt,bt,d])
h = np.subtract(h1dash,h2)
k2 = h + t*deltaeab
z = np.cos(0.5*np.arctan(v/u) + k2)
integrand = integrand + asqrtu2v2*ek1*z*damping
print("rate of intersystem crossing in sec-1")
kisc2 = (kisc1 * integrand * delta* 4.134*1.0E+16)
print(kisc2)
```

---

Fig SF1: Experimentally Studied Phosphahelicene (Yavari et al. *Chem. Eur. J.* **2019**, *25*, 5303-5310)

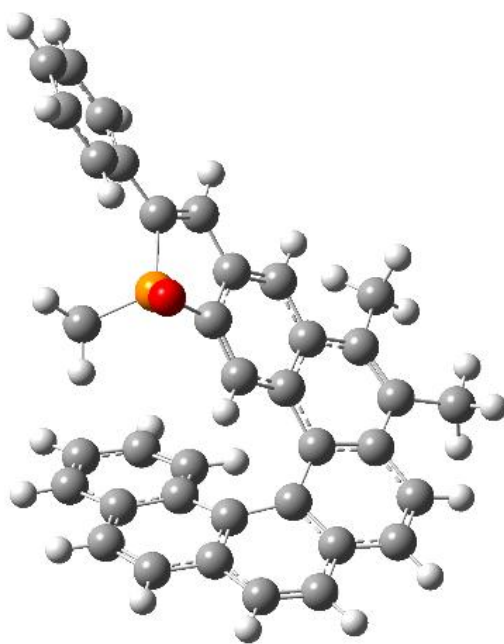

Fig SF2: Vibronic spectra of each excited state and convoluted for all states.

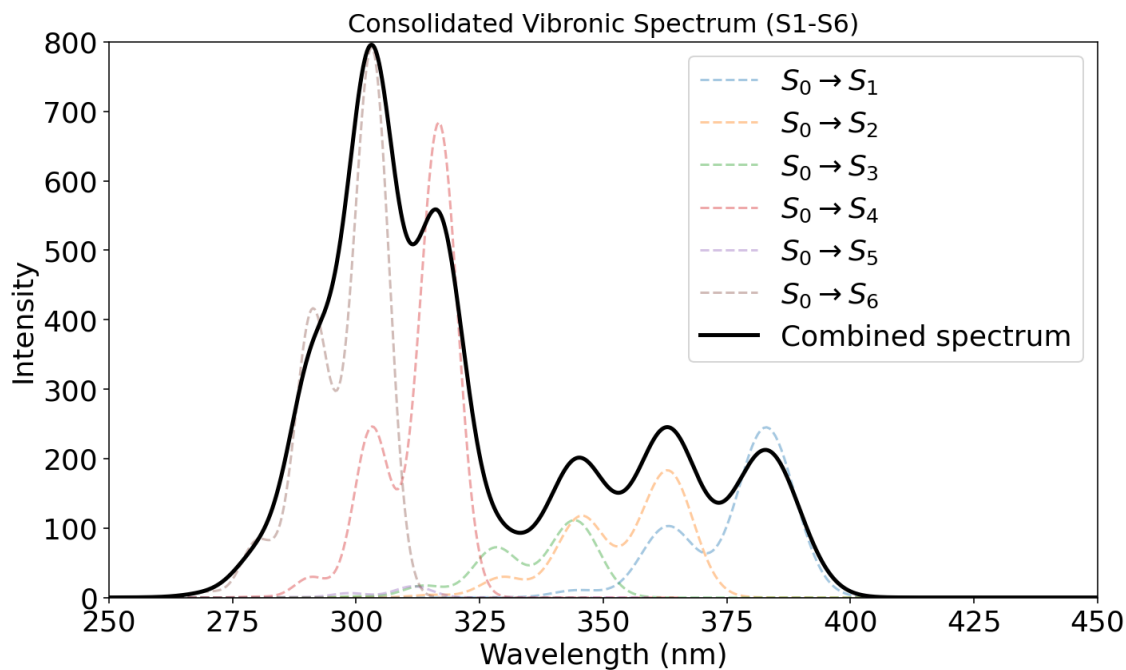

Fig SF3: Merged structure and RMSD value between  $S_0$ - $S_1$  and  $S_0$ - $S_2$  geometries of experimentally studied system considered for benchmarked.

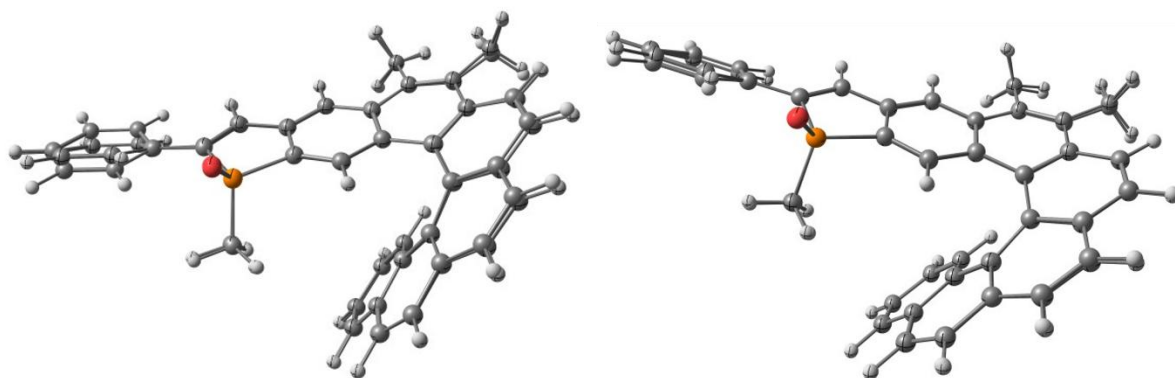

RMSD of  $S_0$ - $S_1$  = 0.22

RMSD of  $S_0$ - $S_2$  = 0.09

ST8: Optimized Cartesian coordinates of experimentally studied P1'  $S_0$  geometry (B3LYP/6-311+G(d,p)) in DCM solvent considered for benchmark

|   |             |             |             |   |             |             |             |
|---|-------------|-------------|-------------|---|-------------|-------------|-------------|
| C | -2.61671300 | -4.04491900 | -0.56140800 | H | -4.76760500 | 4.32873400  | 0.71696300  |
| C | -3.19439500 | -2.76768000 | -0.84940200 | O | 2.58471600  | -1.15924500 | -2.30582200 |
| C | -2.78133800 | -1.61608500 | -0.12953600 | C | 3.72349800  | 0.55388800  | -0.29510000 |

|   |             |             |             |   |             |             |             |
|---|-------------|-------------|-------------|---|-------------|-------------|-------------|
| C | -2.02666800 | -1.83340100 | 1.09903900  | C | 5.18064400  | 0.37265300  | -0.34696700 |
| C | -1.47900300 | -3.12637900 | 1.36454400  | H | 3.54125300  | -2.61604000 | 0.17384100  |
| C | -1.74717600 | -4.20908000 | 0.47044000  | H | -0.61225100 | -0.77868300 | -0.97751200 |
| C | -3.24309900 | -0.32098000 | -0.59706600 | H | 1.09610700  | 3.48948700  | 0.88773700  |
| C | -4.42108800 | -0.30089800 | -1.39593300 | H | -6.04925500 | 0.90909200  | -2.14289000 |
| C | -4.88746400 | -1.49559200 | -2.01491300 | H | -5.28752700 | 2.96872200  | -1.07192100 |
| C | -4.22834000 | -2.67331400 | -1.82523900 | H | -5.75346100 | -1.43975600 | -2.66537300 |
| C | -5.12712000 | 0.92032200  | -1.57195200 | H | -4.53144500 | -3.57171200 | -2.35147400 |
| C | -4.68550700 | 2.07472400  | -0.99341600 | H | -2.36969900 | 0.10815200  | 1.99216600  |
| C | -3.39884500 | 2.13708000  | -0.37874700 | H | -1.13782300 | -0.33709100 | 4.04248700  |
| C | -2.61280500 | 0.95804700  | -0.32369600 | H | -0.03419100 | -2.54395100 | 4.40574600  |
| C | -1.18874600 | 1.13058300  | -0.13114400 | H | -0.31641800 | -4.33443500 | 2.71918700  |
| C | -0.69378900 | 2.37852600  | 0.35392900  | H | -1.30158700 | -5.17712500 | 0.67231200  |
| C | -1.59938800 | 3.47729700  | 0.60551200  | H | -2.89758700 | -4.88600400 | -1.18615200 |
| C | -2.89695900 | 3.38802100  | 0.15123700  | H | -3.40772100 | 5.44547400  | 0.63771600  |
| C | 0.70773300  | 2.55129300  | 0.51437400  | H | -4.13404800 | 4.84961300  | -0.84035600 |
| C | 1.59241800  | 1.55959400  | 0.14813800  | H | -1.83971300 | 5.33021100  | 1.71205700  |
| C | 1.09493300  | 0.34667800  | -0.39336800 | C | 6.02506700  | 1.01643200  | 0.57667400  |
| C | -0.25194900 | 0.13638200  | -0.52863200 | C | 7.40526100  | 0.85737500  | 0.51214400  |
| C | -0.73989700 | -3.34962800 | 2.55152100  | C | 7.97577600  | 0.04530000  | -0.47024800 |
| C | -0.59068400 | -2.35688800 | 3.49442200  | C | 7.15114100  | -0.60710700 | -1.38584300 |
| C | -1.20195300 | -1.10663400 | 3.28143100  | C | 5.76845700  | -0.44845500 | -1.32604800 |
| C | -1.89477200 | -0.85421300 | 2.11523000  | H | 5.59513100  | 1.62991300  | 1.35998200  |
| P | 2.50316800  | -0.70696100 | -0.86529300 | H | 8.03731700  | 1.35927800  | 1.23623500  |
| C | 2.59303800  | -2.09289100 | 0.31269400  | H | 9.05139300  | -0.08099300 | -0.51650800 |
| H | 2.51898100  | -1.73261400 | 1.33997200  | H | 7.58427700  | -1.23949800 | -2.15267000 |
| C | 3.05436200  | 1.62610500  | 0.18971800  | H | 5.13761300  | -0.94705000 | -2.05280700 |
| H | 3.54962000  | 2.51344200  | 0.57146600  | H | 1.77075900  | -2.78109600 | 0.10814100  |
| C | -1.05241700 | 4.71335400  | 1.28562100  | H | -0.38404600 | 4.44090400  | 2.10493400  |
| H | -0.47890100 | 5.34119900  | 0.59423700  |   |             |             |             |
| C | -3.84628100 | 4.56552800  | 0.17672700  |   |             |             |             |

ST9: Benchmarking the methodology for experimentally available absorption data.

i) OPA data of experimentally studied\* HeIP system considered for benchmark.

| Wavelength (in nm) | 276 | 292 | 323 | 345 | 375 | 392 |
|--------------------|-----|-----|-----|-----|-----|-----|
|--------------------|-----|-----|-----|-----|-----|-----|

\* Yavari et al. *Chem. Eur. J.* **2019**, *25*, 5303-5310

ii) OPA data of computationally designed HeIP systems considered for benchmark.

| B3LYP/cc-pVDZ |            |          | B3LYP/aug-cc-pVDZ |            |          | B3LYP/cc-pVTZ |            |          |
|---------------|------------|----------|-------------------|------------|----------|---------------|------------|----------|
| Ex. State     | wavelength | osc.str. | Ex. State         | wavelength | osc.str. | Ex. State     | wavelength | osc.str. |
| 1             | 412.97     | 0.3138   | 1                 | 420.46     | 0.339    | 1             | 419.61     | 0.336    |
| 2             | 403.42     | 0.1269   | 2                 | 408.74     | 0.1048   | 2             | 408.14     | 0.1029   |
| 3             | 364.23     | 0.2198   | 3                 | 370.01     | 0.2052   | 3             | 369.24     | 0.2036   |
| 4             | 359.66     | 0.1384   | 4                 | 366        | 0.124    | 4             | 365.15     | 0.1313   |
| 5             | 355.81     | 0.135    | 5                 | 360.47     | 0.155    | 5             | 360.04     | 0.147    |
| 6             | 343.13     | 0.1185   | 6                 | 348.33     | 0.1287   | 6             | 347.62     | 0.1238   |
| 7             | 334.36     | 0.1641   |                   |            |          |               |            |          |

|    |        |        |    |        |        |    |        |        |
|----|--------|--------|----|--------|--------|----|--------|--------|
| 8  | 325.14 | 0.047  | 7  | 338.72 | 0.15   | 7  | 337.83 | 0.1524 |
| 9  | 322.62 | 0.0972 | 8  | 329.24 | 0.0388 | 8  | 328.6  | 0.0374 |
| 10 | 311.55 | 0.0704 | 9  | 327.27 | 0.0916 | 9  | 326.25 | 0.0956 |
|    |        |        | 10 | 318.12 | 0.0938 | 10 | 316.48 | 0.0848 |

| Cam-B3LYP/cc-pVDZ |            |          | Cam-B3LYP/aug-cc-pVDZ |            |          | Cam-B3LYP/cc-pVTZ |            |          |
|-------------------|------------|----------|-----------------------|------------|----------|-------------------|------------|----------|
| Ex. State         | wavelength | osc.str. | Ex. State             | wavelength | osc.str. | Ex. State         | wavelength | osc.str. |
| 1                 | 360.56     | 0.2551   | 1                     | 366.58     | 0.3119   | 1                 | 365.98     | 0.3127   |
| 2                 | 351.18     | 0.3154   | 2                     | 355.92     | 0.2664   | 2                 | 355.58     | 0.2565   |
| 3                 | 323.97     | 0.2786   | 3                     | 329.34     | 0.2511   | 3                 | 328.74     | 0.2562   |
| 4                 | 308.39     | 0.2107   | 4                     | 313.46     | 0.2485   | 4                 | 312.45     | 0.2474   |
| 5                 | 304.58     | 0.1465   | 5                     | 309.63     | 0.0791   | 5                 | 309.03     | 0.0713   |
| 6                 | 291.64     | 0.5392   | 6                     | 297.31     | 0.5356   | 6                 | 296.33     | 0.5489   |
| 7                 | 278.14     | 0.3416   | 7                     | 283.8      | 0.3565   | 7                 | 282.48     | 0.3431   |
| 8                 | 271.52     | 0.0266   | 8                     | 275.76     | 0.0452   | 8                 | 274.7      | 0.0374   |
| 9                 | 265.59     | 0.2115   | 9                     | 269.31     | 0.2699   | 9                 | 268.41     | 0.2599   |
| 10                | 259.27     | 0.1593   | 10                    | 264.99     | 0.1615   | 10                | 263.54     | 0.1668   |

| M062X/cc-pVDZ |            |          | M062X/aug-cc-pVDZ |            |          | M062X/cc-pVTZ |            |          |
|---------------|------------|----------|-------------------|------------|----------|---------------|------------|----------|
| Ex. State     | wavelength | osc.str. | Ex. State         | wavelength | osc.str. | Ex. State     | wavelength | osc.str. |
| 1             | 361.17     | 0.2539   | 1                 | 367.06     | 0.3112   | 1             | 366.11     | 0.3323   |
| 2             | 350.66     | 0.3764   | 2                 | 355.71     | 0.3166   | 2             | 355.04     | 0.2855   |
| 3             | 322.87     | 0.2181   | 3                 | 328.12     | 0.1981   | 3             | 327.61     | 0.2138   |
| 4             | 309.24     | 0.2686   | 4                 | 314.49     | 0.2917   | 4             | 313.06     | 0.2964   |
| 5             | 304.6      | 0.085    | 5                 | 309.94     | 0.0347   | 5             | 309.02     | 0.0204   |
| 6             | 293.79     | 0.5441   | 6                 | 299.29     | 0.5421   | 6             | 298.03     | 0.5517   |
| 7             | 277.33     | 0.2836   | 7                 | 283.23     | 0.2512   | 7             | 281.69     | 0.2557   |
| 8             | 275.92     | 0.0352   | 8                 | 280.15     | 0.0965   | 8             | 278.55     | 0.0788   |
| 9             | 267.48     | 0.2601   | 9                 | 271.27     | 0.323    | 9             | 269.73     | 0.3265   |
| 10            | 262.25     | 0.1142   | 10                | 268.15     | 0.1039   | 10            | 266.05     | 0.1237   |

| WB97XD/cc-pVDZ |            |          | WB97XD/aug-cc-pVDZ |            |          | WB97XD/cc-pVTZ |            |          |
|----------------|------------|----------|--------------------|------------|----------|----------------|------------|----------|
| Ex. State      | wavelength | osc.str. | Ex. State          | wavelength | osc.str. | Ex. State      | wavelength | osc.str. |

|    |        |        |    |        |        |    |        |        |
|----|--------|--------|----|--------|--------|----|--------|--------|
| 1  | 356.73 | 0.1889 | 1  | 361.66 | 0.2385 | 1  | 361.16 | 0.2386 |
| 2  | 346.41 | 0.3875 | 2  | 350.68 | 0.3475 | 2  | 350.31 | 0.3386 |
| 3  | 321.11 | 0.2768 | 3  | 325.69 | 0.2487 | 3  | 325.21 | 0.2503 |
| 4  | 305.94 | 0.2076 | 4  | 310.31 | 0.2385 | 4  | 309.45 | 0.2387 |
| 5  | 301.5  | 0.1678 | 5  | 305.71 | 0.1127 | 5  | 305.23 | 0.1036 |
| 6  | 287.05 | 0.5631 | 6  | 292.1  | 0.5458 | 6  | 291.12 | 0.5661 |
| 7  | 276.27 | 0.3901 | 7  | 281.06 | 0.4244 | 7  | 280    | 0.4086 |
| 8  | 265.48 | 0.112  | 8  | 268.71 | 0.1275 | 8  | 267.79 | 0.1185 |
| 9  | 259.46 | 0.2127 | 9  | 262.59 | 0.2774 | 9  | 261.79 | 0.2772 |
| 10 | 255.34 | 0.1132 | 10 | 258.94 | 0.2236 | 10 | 257.75 | 0.2087 |

| LCWPBE/cc-pVDZ |            |          | LCWPBE/aug-cc-pVDZ |            |          | LCWPBE/aug-cc-pVTZ |            |          |
|----------------|------------|----------|--------------------|------------|----------|--------------------|------------|----------|
| Ex. State      | wavelength | osc.str. | Ex. State          | wavelength | osc.str. | Ex. State          | wavelength | osc.str. |
| 1              | 336.65     | 0.1176   | 1                  | 341.15     | 0.1423   | 1                  | 340.85     | 0.1542   |
| 2              | 324.77     | 0.4201   | 2                  | 328.95     | 0.4039   | 2                  | 329.27     | 0.3791   |
| 3              | 301.66     | 0.3099   | 3                  | 306.04     | 0.2819   | 3                  | 305.95     | 0.2916   |
| 4              | 288.61     | 0.2279   | 4                  | 292.76     | 0.2399   | 4                  | 292.21     | 0.245    |
| 5              | 282.59     | 0.2589   | 5                  | 286.39     | 0.2261   | 5                  | 286.36     | 0.2055   |
| 6              | 263.42     | 0.4384   | 6                  | 268.55     | 0.3774   | 6                  | 267.88     | 0.4094   |
| 7              | 260.31     | 0.8528   | 7                  | 264.59     | 0.9102   | 7                  | 263.92     | 0.8951   |
| 8              | 248.61     | 0.0571   | 8                  | 251.92     | 0.0587   | 8                  | 251.24     | 0.052    |
| 9              | 239.91     | 0.5516   | 9                  | 242.88     | 0.717    | 9                  | 242.3      | 0.741    |
| 10             | 236.5      | 0.0343   | 10                 | 240.53     | 0.0718   | 10                 | 239.2      | 0.0414   |

ST10: Nearest low lying triplet state optimized for all considered systems in vacuum and four solvent.

| System         | CCl <sub>4</sub> | DCM | DMSO | n-hexane | Vacuum |
|----------------|------------------|-----|------|----------|--------|
| C1234          | 3                | 3   | 3    | 3        | 3      |
| 1C234          | 7                | 6   | 6    | 7        | 7      |
| 12C34          | 4                | 4   | 4    | 4        | 4      |
| P1234          | 3                | 3   | 3    | 3        | 3      |
| 1P234          | 7                | 7   | 7    | 7        | 7      |
| 12P34          | 5                | 5   | 4    | 5        | 5      |
| 1-A-13-D-P1234 | 4                | 4   | 4    | 4        | 4      |
| 3-A-12-D-P1234 | 3                | 3   | 3    | 3        | 4      |
| 1-A-11-D-P1234 | 3                | 3   | 3    | 3        | 3      |
| 3-A-10-D-P1234 | 3                | 3   | 3    | 3        | 3      |

|                |   |   |   |   |   |
|----------------|---|---|---|---|---|
| 1-D-13-A-1P234 | 4 | 4 | 4 | 4 | 5 |
| 3-D-12-A-1P234 | 3 | 3 | 3 | 3 | 3 |
| 2-D-10-A-12P34 | 3 | 3 | 3 | 3 | 3 |
| 2-D-12-A-12P34 | 2 | 2 | 2 | 3 | 3 |
